# Supplementary material for: Copper-responsive gene expression in the methanotroph Methylosinus trichosporium OB3b
Source: Royal Society of Chemistry journal article supplement (doi:10.1039/c5mt00289c), 2016-01-01
Supplement: c5mt00289c1.zip [file c5mt00289c1.zip]

## Sheet: 20140927_jgi_CopDall..txt
File S2. Traits for genes predicted to contain copD domains in the JGI/IMG database on 20140917
gene_oid	TMHMM PredHel	manual	Locus Tag	JGI copC (pfam04234)	JGI Caa3_CtaG (pfam09678)	JGI Cytochrome_CBB3 (PF13442)	JGI YtkA (PF13115)	Gene Symbol	Product Name	DNA Seq Length	AA Seq Length	CuMMO	Genome	Enzymes	COGs	COG Categories	Pfams	TIGRfams	Signal Peptide	Transmembrane Helices
637001825	8		Missing locus_tag:AC_000091.cds1796.1926305..1925433	FALSE	FALSE	FALSE	FALSE	yebZ	predicted inner membrane protein	873	290		Escherichia coli K12- W3110		COG1276	P	pfam05425		No	No
637025272	16		Rv0102	FALSE	TRUE	FALSE	FALSE		PROBABLE CONSERVED INTEGRAL MEMBRANE PROTEIN	1986	661		Mycobacterium tuberculosis H37Rv		COG3336	S	pfam05425 pfam09678		No	Yes
637037280	8		DRA0298	FALSE	FALSE	FALSE	FALSE		hypothetical protein	750	249		Deinococcus radiodurans ATCC BAA-816		COG1276	P	pfam05425		No	Yes
637051437	4		PA1044	FALSE	FALSE	FALSE	FALSE		hypothetical protein	465	154		Pseudomonas aeruginosa PAO1		COG5615	S	pfam05425		No	Yes
637055044	4		PA4610	FALSE	FALSE	FALSE	FALSE		hypothetical protein	435	144		Pseudomonas aeruginosa PAO1				pfam05425		No	Yes
637058992	10		BH2290	FALSE	FALSE	FALSE	FALSE		hypothetical protein	1608	535		Bacillus halodurans C-125		COG1276	P	pfam05425		No	Yes
637064362	8		Z2888	FALSE	FALSE	FALSE	FALSE		putative resistance protein	873	290		Escherichia coli O157:H7 EDL933 (EHEC)		COG1276	P	pfam05425		No	Yes
637072929	16		ML1998	FALSE	TRUE	FALSE	FALSE		possible membrane protein	1980	659		Mycobacterium leprae TN		COG3336	S	pfam05425 pfam09678		No	Yes
637075903	9		mll3323	TRUE	FALSE	FALSE	FALSE		hypothetical protein	1614	537		Mesorhizobium loti MAFF303099		COG1276	P	pfam04234 pfam05425		Yes	Yes
637083187	8		ECs2550	FALSE	FALSE	FALSE	FALSE		putative resistance protein	873	290		Escherichia coli O157:H7 Sakai (EHEC)		COG1276	P	pfam05425		No	No
637094374	16		MT0111	FALSE	TRUE	FALSE	FALSE		hypothetical protein	1986	661		Mycobacterium tuberculosis CDC1551		COG3336	S	pfam05425 pfam09678		No	Yes
637103420	4		BB1299	FALSE	FALSE	FALSE	FALSE		hypothetical protein	453	150		Bordetella bronchiseptica RB50		COG5615	S	pfam05425		No	Yes
637104639	4		BB2497	FALSE	FALSE	FALSE	FALSE		hypothetical protein	447	148		Bordetella bronchiseptica RB50		COG3399	S	pfam05425		No	Yes
637108222	4		BPP1083	FALSE	FALSE	FALSE	FALSE		hypothetical protein	453	150		Bordetella parapertussis 12822		COG5615	S	pfam05425		No	Yes
637108551	4		BPP1423	FALSE	FALSE	FALSE	FALSE		hypothetical protein	447	148		Bordetella parapertussis 12822		COG3399	S	pfam05425		No	Yes
637113298	4		BP2109	FALSE	FALSE	FALSE	FALSE		hypothetical protein	447	148		Bordetella pertussis Tohama I		COG3399	S	pfam05425		No	Yes
637114041	4		BP2917	FALSE	FALSE	FALSE	FALSE		hypothetical protein	453	150		Bordetella pertussis Tohama I		COG5615	S	pfam05425		No	Yes
637116450	4		CT1504	FALSE	FALSE	FALSE	FALSE		hypothetical protein	438	145		Chlorobium tepidum TLS				pfam05425		No	Yes
637119011	16		DIP1805	FALSE	TRUE	FALSE	FALSE		hypothetical protein	2037	678		Corynebacterium diphtheriae gravis NCTC 13129		COG1276 COG3336	P S	pfam05425 pfam09678		No	Yes
637135262	16		MAP2297c	FALSE	TRUE	FALSE	FALSE		hypothetical protein	2070	689		Mycobacterium avium paratuberculosis K-10		COG1276 COG3336	P S	pfam05425 pfam09678		No	Yes
637137441	16		Mb0105	FALSE	TRUE	FALSE	FALSE		PROBABLE CONSERVED INTEGRAL MEMBRANE PROTEIN	1986	661		Mycobacterium bovis AF2122/97		COG3336	S	pfam05425 pfam09678		No	Yes
637144519	4		PP_1124	FALSE	FALSE	FALSE	FALSE		hypothetical protein	465	154		Pseudomonas putida KT2440		COG5615	S	pfam05425		No	Yes
637165871	9		LMOf2365_2093	TRUE	FALSE	FALSE	FALSE		copper resistance domain protein	1626	541		Listeria monocytogenes 4b F2365		COG1276 COG2372	P R	pfam04234 pfam05425		Yes	Yes
637169246	4		MCA0019	FALSE	FALSE	FALSE	FALSE		hypothetical protein	462	153	gMOB	Methylococcus capsulatus Bath		COG5615	S	pfam05425		No	No
637170013	13	ctag	MCA0807	FALSE	TRUE	FALSE	FALSE		copper resistance protein	1680	559	gMOB	Methylococcus capsulatus Bath		COG1276	P	pfam05425		No	No
637180069	9		SMa1198	TRUE	FALSE	FALSE	FALSE		possible Copper export protein	1626	541		Ensifer meliloti 1021		COG1276	P	pfam04234 pfam05425		No	Yes
637200831	8		YPO1785	FALSE	FALSE	FALSE	FALSE		putative copper resistance protein D	885	294		Yersinia pestis CO-92		COG1276	P	pfam05425		No	Yes
637207296	8		SAV4166	TRUE	FALSE	FALSE	FALSE		hypothetical protein	1770	589		Streptomyces avermitilis MA-4680		COG1276	P	pfam04234 pfam05425		No	Yes
637207375	8		SAV4241	TRUE	FALSE	FALSE	FALSE		integral membrane protein	2085	694		Streptomyces avermitilis MA-4680		COG2372	R	pfam04234 pfam05425		Yes	Yes
637209615	5		SAV6449	FALSE	FALSE	FALSE	FALSE		hypothetical protein	1053	350		Streptomyces avermitilis MA-4680		COG1276	P	pfam05425		No	Yes
637212600	8		STM1874	FALSE	FALSE	FALSE	FALSE		putative inner membrane protein	876	291		Salmonella enterica enterica sv Typhimurium LT2		COG1276	P	pfam05425		No	Yes
637217145	8		STY2080	FALSE	FALSE	FALSE	FALSE		putative cation transporter	876	291		Salmonella enterica enterica sv Typhi CT18		COG1276	P	pfam05425		No	Yes
637221889	9		lmo2062	TRUE	FALSE	FALSE	FALSE		hypothetical protein	1626	541		Listeria monocytogenes EGD-e		COG1276	P	pfam04234 pfam05425		Yes	Yes
637224921	9		lin2168	TRUE	FALSE	FALSE	FALSE		hypothetical protein	1626	541		Listeria innocua Clip11262		COG1276 COG2372	P R	pfam04234 pfam05425		Yes	Yes
637240519	8		RSp0659	FALSE	FALSE	FALSE	FALSE	copD	PROBABLE COPPER RESISTANCE D TRANSMEMBRANE PROTEIN	930	309		Ralstonia solanacearum GMI1000		COG1276	P	pfam05425		No	Yes
637266061	7		SCO1826	FALSE	FALSE	FALSE	FALSE		membrane protein	1008	335		Streptomyces coelicolor A3(2)		COG1276	P	pfam05425		No	Yes
637268220	9		SCO3964	TRUE	FALSE	FALSE	FALSE		hypothetical protein	2043	680		Streptomyces coelicolor A3(2)		COG2372	R	pfam04234 pfam05425		Yes	Yes
637268312	8		SCO4053	TRUE	FALSE	FALSE	FALSE		transport integral membrane protein	1770	589		Streptomyces coelicolor A3(2)		COG2372	R	pfam04234 pfam05425		Yes	Yes
637278817	9		BCE_1997	TRUE	FALSE	FALSE	TRUE		hypothetical protein	1635	544		Bacillus cereus ATCC 10987		COG1276	P	pfam04234 pfam05425 pfam13115		Yes	Yes
637302293	9		BA1912	TRUE	FALSE	FALSE	TRUE		hypothetical protein	1635	544		Bacillus anthracis Ames		COG1276	P	pfam04234 pfam05425 pfam13115		Yes	Yes
637310967	8		y2522	FALSE	FALSE	FALSE	FALSE		resistance protein, exporter	885	294		Yersinia pestis KIM 10		COG1276	P	pfam05425		No	Yes
637318618	4		PFL_1278	FALSE	FALSE	FALSE	FALSE		hypothetical protein	465	154		Pseudomonas fluorescens Pf-5		COG5615	S	pfam05425		No	Yes
637319881	8		PFL_2542	FALSE	FALSE	FALSE	FALSE		probable copper resistance protein D	876	291		Pseudomonas fluorescens Pf-5		COG1276	P	pfam05425		No	Yes
637326067	10		OB2413	FALSE	FALSE	FALSE	FALSE		hypothetical protein	1101	366		Oceanobacillus iheyensis HTE831		COG1276	P	pfam05425		No	Yes
637356087	8		c2250	FALSE	FALSE	FALSE	FALSE	yebZ	Hypothetical protein yebZ	873	290		Escherichia coli O6:K2:H1 CFT073 (UPEC)		COG1276	P	pfam05425		No	No
637372452	9		bll4878	TRUE	FALSE	FALSE	FALSE		possible Copper export protein	1668	555		Bradyrhizobium japonicum USDA 110		COG1276	P	pfam04234 pfam05425		No	Yes
637374497	13		bll6908	FALSE	FALSE	FALSE	FALSE		hypothetical protein	1656	551		Bradyrhizobium japonicum USDA 110		COG1276	P	pfam05425		No	Yes
637404809	8		t1003	FALSE	FALSE	FALSE	FALSE		putative cation transporter	876	291		Salmonella enterica enterica sv Typhi Ty2		COG1276	P	pfam05425		No	Yes
637418622	9		BC1838	TRUE	FALSE	FALSE	TRUE		Copper resistance protein	1650	549		Bacillus cereus ATCC 14579		COG1276	P	pfam04234 pfam05425 pfam13115		Yes	Yes
637428383	10		NE2058	FALSE	FALSE	TRUE	FALSE		Cytochrome c, class IC:Cytochrome c, class I	2148	715	bAOB	Nitrosomonas europaea ATCC 19718		COG1276	P	pfam05425 pfam13442		No	Yes
637447538	4		PMT0846	FALSE	FALSE	FALSE	FALSE		hypothetical protein	444	147		Prochlorococcus marinus MIT 9313				pfam05425		No	Yes
637464459	8		plu2687	FALSE	FALSE	FALSE	FALSE		hypothetical protein	894	297		Photorhabdus luminescens laumondii TTO1		COG1276	P	pfam05425		No	Yes
637476066	9		RPA2929	TRUE	FALSE	FALSE	FALSE		hypothetical protein	1581	526		Rhodopseudomonas palustris CGA009		COG1276 COG2372	P R	pfam04234 pfam05425		No	Yes
637486995	4		PSPPH_1405	FALSE	FALSE	FALSE	FALSE		hypothetical protein	465	154		Pseudomonas syringae pv. phaseolicola 1448A		COG5615	S	pfam05425		No	Yes
637492291	8		YP_1607	FALSE	FALSE	FALSE	FALSE	pcoD	putative copper resistance protein D	885	294		Yersinia pestis bv Microtus 91001		COG1276	P	pfam05425		No	Yes
637505025	9		BAS1774	TRUE	FALSE	FALSE	TRUE		hypothetical protein	1635	544		Bacillus anthracis Sterne		COG1276	P	pfam04234 pfam05425 pfam13115		Yes	Yes
637513183	9		BT9727_1753	TRUE	FALSE	FALSE	TRUE		possible copper resistance protein	1635	544		Bacillus thuringiensis sv konkukian 97-27		COG1276	P	pfam04234 pfam05425 pfam13115		Yes	Yes
637527014	17		Lxx23680	FALSE	TRUE	FALSE	FALSE		hypothetical protein	2040	679		Leifsonia xyli xyli CTCB07		COG1276 COG3336	P S	pfam05425 pfam09678		No	Yes
637527112	16		Lxx24960	FALSE	TRUE	FALSE	FALSE		hypothetical protein	2013	670		Leifsonia xyli xyli CTCB07		COG1276 COG3336	P S	pfam05425 pfam09678		No	Yes
637533282	8		YPTB1661	FALSE	FALSE	FALSE	FALSE		putative copper resistance protein D	885	294		Yersinia pseudotuberculosis IP 32953		COG1276	P	pfam05425		No	Yes
637545960	9		BCZK1731	TRUE	FALSE	FALSE	TRUE		possible copper resistance protein	1644	547		Bacillus cereus E33L (ZK)		COG1276	P	pfam04234 pfam05425 pfam13115		Yes	Yes
637561114	8		BMA0252	FALSE	FALSE	FALSE	FALSE		copper resistance protein, putative	927	308		Burkholderia mallei ATCC 23344		COG1276	P	pfam05425		No	Yes
637562842	3		BMA2211	FALSE	FALSE	FALSE	FALSE		hypothetical protein	393	130		Burkholderia mallei ATCC 23344		COG5615	S	pfam05425		No	Yes
637566686	8		BPSL0698	FALSE	FALSE	FALSE	FALSE		putative transmembrane transporter protein	927	308		Burkholderia pseudomallei K96243		COG1276	P	pfam05425		No	Yes
637567056	4		BPSL1071	FALSE	FALSE	FALSE	FALSE		hypothetical protein	459	152		Burkholderia pseudomallei K96243		COG5615	S	pfam05425		No	Yes
637569905	7		BPSS0459	FALSE	FALSE	FALSE	FALSE		copper-resistance membrane protein	945	314		Burkholderia pseudomallei K96243		COG1276	P	pfam05425		No	Yes
637572618	9		nfa1090	FALSE	FALSE	FALSE	FALSE		hypothetical protein	930	309		Nocardia farcinica IFM 10152		COG1276	P	pfam05425		No	Yes
637573840	16		nfa13020	FALSE	TRUE	FALSE	FALSE		hypothetical protein	2052	683		Nocardia farcinica IFM 10152		COG1276 COG3336	P S	pfam05425 pfam09678		No	Yes
637586361	4		PBPRA1652	FALSE	FALSE	FALSE	FALSE		hypothetical protein	444	147		Photobacterium profundum SS9				pfam05425		No	Yes
637601261	8		SPA0995	FALSE	FALSE	FALSE	FALSE		putative cation transporter	876	291		Salmonella enterica enterica sv Paratyphi A, ATCC 9150		COG1276	P	pfam05425		No	Yes
637605770	8		IL1232	FALSE	FALSE	FALSE	FALSE	copD	Copper export protein	846	281		Idiomarina loihiensis L2TR		COG1276	P	pfam05425		No	Yes
637610705	4		ebA6005	FALSE	FALSE	FALSE	FALSE		predicted integral membrane protein	456	151		Aromatoleum aromaticum EbN1		COG5615	S	pfam05425		No	Yes
637640758	8		SC1879	FALSE	FALSE	FALSE	FALSE	yebZ	putative inner membrane protein	876	291		Salmonella enterica enterica sv Choleraesuis SC-B67		COG1276	P	pfam05425		No	Yes
637651838	8		Psyr_1496	FALSE	FALSE	FALSE	FALSE		Copper resistance D	933	310		Pseudomonas syringae pv. syringae B728a		COG1276	P	pfam05425		No	Yes
637654214	4		Psyr_3857	FALSE	FALSE	FALSE	FALSE		hypothetical protein	465	154		Pseudomonas syringae pv. syringae B728a		COG5615	S	pfam05425		No	Yes
637664322	16		jk0532	FALSE	TRUE	FALSE	FALSE		hypothetical protein	2319	772		Corynebacterium jeikeium K411		COG3336	S	pfam05425 pfam09678		No	Yes
637669311	3		Psyc_0620	FALSE	FALSE	FALSE	FALSE		hypothetical protein	441	146		Psychrobacter arcticus 273-4				pfam05425		No	Yes
637684658	16		Tfu_0963	FALSE	TRUE	FALSE	FALSE		hypothetical protein	2079	692		Thermobifida fusca YX		COG1276 COG3336	P S	pfam05425 pfam09678		No	Yes
637691620	4		Reut_A2220	FALSE	FALSE	FALSE	FALSE		integral membrane protein	462	153		Cupriavidus necator JMP134		COG5615	S	pfam05425		No	Yes
637691895	8		Reut_A2486	FALSE	FALSE	FALSE	FALSE		Copper resistance D	912	303		Cupriavidus necator JMP134		COG1276	P	pfam05425		No	Yes
637709478	4		Tbd_0800	FALSE	FALSE	FALSE	FALSE		hypothetical protein	456	151		Thiobacillus denitrificans ATCC 25259		COG5615	S	pfam05425		No	Yes
637722748	4		NP4396A	FALSE	FALSE	FALSE	FALSE		hypothetical protein	429	142		Natronomonas pharaonis Gabara, DSM 2160				pfam05425		No	Yes
637722855	9		NP4610A	TRUE	FALSE	FALSE	FALSE		hypothetical protein	1980	659		Natronomonas pharaonis Gabara, DSM 2160		COG1276	P	pfam04234 pfam05425		Yes	Yes
637735957	8		PSHAb0008	FALSE	FALSE	FALSE	FALSE		Putative copper export protein	903	300		Pseudoalteromonas haloplanktis TAC125		COG1276	P	pfam05425		No	Yes
637738224	14	ctag	Noc_1741	FALSE	FALSE	FALSE	FALSE		Copper resistance D	1653	550	gAOB	Nitrosococcus oceani C-107, ATCC 19707		COG1276	P	pfam05425		No	Yes
637741076	4		Pfl_1224	FALSE	FALSE	FALSE	FALSE		hypothetical protein	465	154		Pseudomonas fluorescens Pf0-1		COG5615	S	pfam05425		No	Yes
637743323	8		Pfl_3447	FALSE	FALSE	FALSE	FALSE		Copper resistance D	858	285		Pseudomonas fluorescens Pf0-1		COG1276	P	pfam05425		No	Yes
637743694	7		Pfl_3813	FALSE	FALSE	FALSE	FALSE		Copper resistance D	864	287		Pseudomonas fluorescens Pf0-1		COG1276	P	pfam05425		No	Yes
637764013	4		Bcep18194_A5697	FALSE	FALSE	FALSE	FALSE		integral membrane protein-like	459	152		Burkholderia cepacia 383		COG5615	S	pfam05425		No	Yes
637764315	8		Bcep18194_A5995	FALSE	FALSE	FALSE	FALSE		Copper resistance D	933	310		Burkholderia cepacia 383		COG1276	P	pfam05425		No	Yes
637767609	8		Bcep18194_B2761	FALSE	FALSE	FALSE	FALSE		Copper resistance protein D	942	313		Burkholderia cepacia 383		COG1276	P	pfam05425		No	Yes
637784854	4		Tcr_0149	FALSE	FALSE	FALSE	FALSE		hypothetical protein	483	160		Thiomicrospira crunogena XCL-2		COG5615	S	pfam05425		No	Yes
637788793	9		GBAA1912	TRUE	FALSE	FALSE	TRUE		hypothetical protein	1635	544		Bacillus anthracis Ames Ancestor A2084		COG1276	P	pfam04234 pfam05425 pfam13115		Yes	Yes
637793021	4		Tmden_0612	FALSE	FALSE	FALSE	FALSE		hypothetical protein	444	147		Sulfurimonas denitrificans DSM 1251		COG3399	S	pfam05425		No	Yes
637812408	10		Nmul_A2320	FALSE	FALSE	TRUE	FALSE		Cytochrome c, class I	2109	702	bAOB	Nitrosospira multiformis ATCC 25196		COG1276	P	pfam05425 pfam13442		No	Yes
637812852	10		Nmul_A2760	FALSE	FALSE	TRUE	FALSE		Cytochrome c, class I	2109	702	bAOB	Nitrosospira multiformis ATCC 25196		COG1276	P	pfam05425 pfam13442		No	Yes
637818838	12		amb0230	FALSE	FALSE	FALSE	FALSE		Putative copper export protein	1584	527		Magnetospirillum magneticum AMB-1		COG1276	P	pfam05425		No	Yes
637832609	4		HCH_02228	FALSE	FALSE	FALSE	FALSE		predicted integral membrane protein	450	149		Hahella chejuensis KCTC 2396		COG5615	S	pfam05425		No	Yes
637839257	8		BTH_II1956	FALSE	FALSE	FALSE	FALSE		copper resistance protein, putative	948	315		Burkholderia thailandensis E264		COG1276	P	pfam05425		No	Yes
637840283	8		BTH_I0610	FALSE	FALSE	FALSE	FALSE		copper resistance protein, putative	927	308		Burkholderia thailandensis E264		COG1276	P	pfam05425		No	Yes
637840614	4		BTH_I0942	FALSE	FALSE	FALSE	FALSE		hypothetical protein	459	152		Burkholderia thailandensis E264		COG5615	S	pfam05425		No	Yes
637853235	8		SG1277	FALSE	FALSE	FALSE	FALSE		putative copper resistance protein	933	310		Sodalis glossinidius morsitans		COG1276	P	pfam05425		No	Yes
637873864	9		CYA_2334	TRUE	FALSE	FALSE	FALSE	copCD	copper resistance protein C/D	1617	538		Synechococcus sp. JA-3-3Ab		COG2372	R	pfam04234 pfam05425		No	Yes
637875916	9		CYB_1516	TRUE	FALSE	FALSE	FALSE		copper resistance protein CopC/D	1626	541		Synechococcus sp. JA-2-3B'a(2-13)		COG2372	R	pfam04234 pfam05425		No	Yes
637880116	16		Francci3_2795	FALSE	TRUE	FALSE	FALSE		copper resistance D	2211	736		Frankia sp. CcI3		COG3336	S	pfam05425 pfam09678		No	Yes
637881502	9		Francci3_4174	TRUE	FALSE	FALSE	FALSE		copper resistance protein CopC	1680	559		Frankia sp. CcI3		COG1276 COG2372	P R	pfam04234 pfam05425		Yes	Yes
637884496	8		RPB_2596	TRUE	FALSE	FALSE	FALSE		Copper resistance protein	1539	512		Rhodopseudomonas palustris HaA2		COG1276	P	pfam04234 pfam05425		No	Yes
637916033	4		Rfer_1219	FALSE	FALSE	FALSE	FALSE		hypothetical protein	477	158		Rhodoferax ferrireducens T118				pfam05425		No	Yes
637925534	9		RPC_2426	TRUE	FALSE	FALSE	FALSE		copper resistance D	1620	539		Rhodopseudomonas palustris BisB18		COG1276 COG2372	P R	pfam04234 pfam05425 pfam05751		No	Yes
637933747	8		UTI89_C2042	FALSE	FALSE	FALSE	FALSE	yebZ	hypothetical protein YebZ	873	290		Escherichia coli UTI89 (UPEC)		COG1276	P	pfam05425		No	Yes
637940004	4		Bpro_0319	FALSE	FALSE	FALSE	FALSE		hypothetical protein	483	160		Polaromonas sp. JS666		COG5615	S	pfam05425		No	Yes
637946301	4		Bxe_A3337	FALSE	FALSE	FALSE	FALSE		hypothetical protein	459	152		Burkholderia xenovorans LB400		COG5615	S	pfam05425		No	Yes
637948978	8		Bxe_A0653	FALSE	FALSE	FALSE	FALSE		Putative copper-resistance transporter, CopD	930	309		Burkholderia xenovorans LB400		COG1276	P	pfam05425		No	Yes
637964478	7		RPD_4272	FALSE	FALSE	FALSE	FALSE		copper resistance D	933	310		Rhodopseudomonas palustris BisB5		COG1276	P	pfam05425		No	Yes
637964907	7		Nham_4397	FALSE	FALSE	FALSE	FALSE		copper resistance D	960	319		Nitrobacter hamburgensis X14		COG1276	P	pfam05425		No	Yes
637970655	8		Nham_2198	TRUE	FALSE	FALSE	FALSE		copper resistance D	1560	519		Nitrobacter hamburgensis X14		COG1276	P	pfam04234 pfam05425		Yes	Yes
637975141	8		Rmet_6115	FALSE	FALSE	FALSE	FALSE		copper resistance D	918	305		Cupriavidus metallidurans CH34		COG1276	P	pfam05425		No	Yes
637981087	8		Rmet_5668	FALSE	FALSE	FALSE	FALSE		copper resistance D	900	299		Cupriavidus metallidurans CH34		COG1276	P	pfam05425		No	Yes
637986048	13		Acid345_4020	FALSE	FALSE	FALSE	FALSE		copper resistance D	1641	546		Candidatus Koribacter versatilis Ellin345		COG1276	P	pfam05425		No	Yes
638000344	4		PSEEN1272	FALSE	FALSE	FALSE	FALSE		hypothetical protein	465	154		Pseudomonas entomophila L48		COG5615	S	pfam05425		No	Yes
638007056	8		TM1040_1742	FALSE	FALSE	FALSE	FALSE		copper resistance D	867	288		Ruegeria sp. TM1040		COG1276	P	pfam05425		No	Yes
638010805	8		Sala_2426	FALSE	FALSE	FALSE	FALSE		copper resistance D	969	322		Sphingopyxis alaskensis RB2256		COG1276	P	pfam05425		No	Yes
638015024	4		Bcen_1746	FALSE	FALSE	FALSE	FALSE		integral membrane protein-like	459	152		Burkholderia cenocepacia AU 1054		COG5615	S	pfam05425		No	Yes
638015336	8		Bcen_2056	FALSE	FALSE	FALSE	FALSE		copper resistance D	933	310		Burkholderia cenocepacia AU 1054		COG1276	P	pfam05425		No	Yes
638018036	8		Bcen_4750	FALSE	FALSE	FALSE	FALSE		copper resistance D	942	313		Burkholderia cenocepacia AU 1054		COG1276	P	pfam05425		No	Yes
638032754	16		Mmcs_3617	FALSE	TRUE	FALSE	FALSE		copper resistance D	1998	665		Mycobacterium sp. MCS		COG1276 COG3336	P S	pfam05425 pfam09678		No	Yes
638034211	9		Mmcs_5053	FALSE	FALSE	FALSE	FALSE		copper resistance D	930	309		Mycobacterium sp. MCS		COG1276	P	pfam05425		No	Yes
638040377	8		YPN_2338	FALSE	FALSE	FALSE	FALSE		copper resistance protein D	885	294		Yersinia pestis Nepal516		COG1276	P	pfam05425		No	Yes
638043249	8		YPA_1160	FALSE	FALSE	FALSE	FALSE		putative copper resistance protein D	885	294		Yersinia pestis Antiqua		COG1276	P	pfam05425		No	Yes
638062919	8		ECP_1784	FALSE	FALSE	FALSE	FALSE		hypothetical protein YebZ (putative copper resistance protein D)	873	290		Escherichia coli O6:K15:H31 536 (UPEC)		COG1276	P	pfam05425		No	Yes
638075576	8		SFV_1842	FALSE	FALSE	FALSE	FALSE		putative resistance protein	873	290		Shigella flexneri 5 8401		COG1276	P	pfam05425		No	No
638087984	16		RHA1_ro01397	FALSE	TRUE	FALSE	FALSE		probable copper resistance transporter	2031	676		Rhodococcus jostii RHA1		COG1276 COG3336	P S	pfam05425 pfam09678		No	Yes
638090575	9		RHA1_ro03992	FALSE	FALSE	FALSE	FALSE		possible copper resistance protein	939	312		Rhodococcus jostii RHA1		COG1276	P	pfam05425		Yes	Yes
638096856	9		FRAAL0092	TRUE	FALSE	FALSE	FALSE		putative transport integral membrane protein; putative Copper resistance domain	1710	569		Frankia alni ACN14a		COG1276 COG2372	P R	pfam04234 pfam05425		Yes	Yes
638100994	15		FRAAL4308	FALSE	TRUE	FALSE	FALSE		hypothetical protein	2364	787		Frankia alni ACN14a		COG3336	S	pfam05425 pfam09678		No	Yes
638125239	8		Mlg_0498	FALSE	FALSE	FALSE	FALSE		copper resistance D domain protein	903	300		Alkalilimnicola ehrlichei MLHE-1		COG1276	P	pfam05425		No	Yes
638125715	4		Mlg_0964	FALSE	FALSE	FALSE	FALSE		hypothetical protein	459	152		Alkalilimnicola ehrlichei MLHE-1		COG5615	S	pfam05425		No	Yes
638126367	4		Mlg_1610	FALSE	FALSE	FALSE	FALSE		hypothetical protein	468	155		Alkalilimnicola ehrlichei MLHE-1		COG5615	S	pfam05425		No	Yes
638127797	14		GbCGDNIH1_0044	FALSE	FALSE	FALSE	FALSE		copper resistance protein D	1653	550		Granulibacter bethesdensis CGDNIH1		COG1276	P	pfam05425		No	Yes
638129104	4		GbCGDNIH1_1311	FALSE	FALSE	FALSE	FALSE		hypothetical protein	480	159		Granulibacter bethesdensis CGDNIH1		COG5615	S	pfam05425		No	Yes
638132531	10		Neut_2313	FALSE	FALSE	TRUE	FALSE		copper resistance D domain protein	2145	714	bAOB	Nitrosomonas eutropha C91		COG1276	P	pfam00578 pfam05425 pfam13442		No	Yes
638144267	8		HNE_1704	FALSE	FALSE	FALSE	FALSE	copD	copper resistance protein D	831	276		Hyphomonas neptunium ATCC 15444		COG1276	P	pfam05425		No	Yes
638150228	4		Bamb_2394	FALSE	FALSE	FALSE	FALSE		integral membrane protein-like protein	459	152		Burkholderia cepacia AMMD		COG5615	S	pfam05425		No	Yes
638150559	8		Bamb_2720	FALSE	FALSE	FALSE	FALSE		copper resistance D domain protein	933	310		Burkholderia cepacia AMMD		COG1276	P	pfam05425		No	Yes
638153036	8		Bamb_5193	FALSE	FALSE	FALSE	FALSE		copper resistance D domain protein	942	313		Burkholderia cepacia AMMD		COG1276	P	pfam05425		No	Yes
638180256	4		Ta0094	FALSE	FALSE	FALSE	FALSE	Ta0094	conserved hypothetical membrane protein	504	167		Thermoplasma acidophilum DSM 1728		COG5615	S	pfam05425		No	Yes
638183641	4		rrnAC2011	FALSE	FALSE	FALSE	FALSE		unknown	432	143		Haloarcula marismortui ATCC 43049				pfam05425		No	No
638190659	5		TVG0170162	FALSE	FALSE	FALSE	FALSE	TVG0170162	hypothetical protein	615	204		Thermoplasma volcanium GSS1		COG5615	S	pfam05425		No	Yes
638375549			Magn03010978	FALSE	FALSE	FALSE	FALSE		COG1276: Putative copper export protein	1590	529		Magnetospirillum magnetotacticum MS-1		COG1276	P	pfam05425		No	Yes
638425336	9		LMOf6854_2124	TRUE	FALSE	FALSE	FALSE		copper resistance domain protein	1626	541		Listeria monocytogenes 1/2a F6854		COG1276 COG2372	P R	pfam04234 pfam05425		Yes	Yes
638428240	9		LMOh7858_2191	TRUE	FALSE	FALSE	FALSE		copper resistance domain protein	1626	541		Listeria monocytogenes 4b H7858		COG1276 COG2372	P R	pfam04234 pfam05425		Yes	Yes
638454166	9		BCE_G9241_1921	TRUE	FALSE	FALSE	TRUE		copper resistance protein	1635	544		Bacillus cereus G9241		COG1276	P	pfam04234 pfam05425 pfam13115		Yes	Yes
638482813	16		BlinB01000873	FALSE	TRUE	FALSE	FALSE		COG3336: Predicted membrane protein	2079	692		Brevibacterium linens BL2		COG1276 COG3336	P S	pfam05425 pfam09678		No	Yes
638484736	16		BlinB01002823	FALSE	TRUE	FALSE	FALSE		COG3336: Predicted membrane protein	1926	641		Brevibacterium linens BL2		COG3336	S	pfam05425 pfam09678		Yes	Yes
638513912	4		Bmal10_03000816	FALSE	FALSE	FALSE	FALSE		Predicted integral membrane protein	435	144		Burkholderia mallei 10399		COG5615	S	pfam05425		No	Yes
638517890	8		Bmal10_03004871	FALSE	FALSE	FALSE	FALSE		Putative copper export protein	927	308		Burkholderia mallei 10399		COG1276	P	pfam05425		No	Yes
638518242	4		BmalG_01000253	FALSE	FALSE	FALSE	FALSE		COG5615: Predicted integral membrane protein	435	144		Burkholderia mallei GB8 horse 4		COG5615	S	pfam05425		No	Yes
638533186	7		Bpse1_03000909	FALSE	FALSE	FALSE	FALSE		Putative copper export protein	945	314		Burkholderia pseudomallei 1655		COG1276	P	pfam05425		No	Yes
638535291	4		Bpse1_03003054	FALSE	FALSE	FALSE	FALSE		Predicted integral membrane protein	435	144		Burkholderia pseudomallei 1655		COG5615	S	pfam05425		No	Yes
638537120	8		Bpse1_03004928	FALSE	FALSE	FALSE	FALSE		Putative copper export protein	927	308		Burkholderia pseudomallei 1655		COG1276	P	pfam05425		No	Yes
638537780	7		Bpse17_02000088	FALSE	FALSE	FALSE	FALSE		Putative copper export protein	945	314		Burkholderia pseudomallei 1710a		COG1276	P	pfam05425		No	Yes
638538976	4		Bpse17_02001328	FALSE	FALSE	FALSE	FALSE		Predicted integral membrane protein	435	144		Burkholderia pseudomallei 1710a		COG5615	S	pfam05425		No	Yes
638539884	8		Bpse17_02002254	FALSE	FALSE	FALSE	FALSE		Putative copper export protein	927	308		Burkholderia pseudomallei 1710a		COG1276	P	pfam05425		No	Yes
638549350	7		BpseP_03000780	FALSE	FALSE	FALSE	FALSE		Putative copper export protein	945	314		Burkholderia pseudomallei Pasteur		COG1276	P	pfam05425		No	Yes
638549732	4		BpseP_03001166	FALSE	FALSE	FALSE	FALSE		Predicted integral membrane protein	435	144		Burkholderia pseudomallei Pasteur		COG5615	S	pfam05425		No	Yes
638553094	8		BpseP_03004597	FALSE	FALSE	FALSE	FALSE		Putative copper export protein	927	308		Burkholderia pseudomallei Pasteur		COG1276	P	pfam05425		No	Yes
638555008	7		BpseS_03000858	FALSE	FALSE	FALSE	FALSE		Putative copper export protein	945	314		Burkholderia pseudomallei S13		COG1276	P	pfam05425		No	Yes
638557060	8		BpseS_03002952	FALSE	FALSE	FALSE	FALSE		Putative copper export protein	927	308		Burkholderia pseudomallei S13		COG1276	P	pfam05425		No	Yes
638557785	4		BpseS_03003693	FALSE	FALSE	FALSE	FALSE		Predicted integral membrane protein	435	144		Burkholderia pseudomallei S13		COG5615	S	pfam05425		No	Yes
638597028	4		BmalF_02000240	FALSE	FALSE	FALSE	FALSE		COG5615: Predicted integral membrane protein	435	144		Burkholderia mallei FMH		COG5615	S	pfam05425		No	Yes
638601266	8		BmalF_02004551	FALSE	FALSE	FALSE	FALSE		hypothetical protein	927	308		Burkholderia mallei FMH		COG1276	P	pfam05425		No	Yes
638601881	4		BmalJ_02000247	FALSE	FALSE	FALSE	FALSE		COG5615: Predicted integral membrane protein	435	144		Burkholderia mallei JHU		COG5615	S	pfam05425		No	Yes
638606075	8		BmalJ_02004521	FALSE	FALSE	FALSE	FALSE		hypothetical protein	927	308		Burkholderia mallei JHU		COG1276	P	pfam05425		No	Yes
638641763	9		RBTH_02454	TRUE	FALSE	FALSE	TRUE		Copper resistance protein	1650	549		Bacillus thuringiensis sv israelensis ATCC 35646		COG1276	P	pfam04234 pfam05425 pfam13115		Yes	Yes
638657986	8		EcolB7_01003383	FALSE	FALSE	FALSE	FALSE		COG1276: Putative copper export protein	873	290		Escherichia coli O148:H28 B7A (CS6:LT+:ST+)(ETEC)		COG1276	P	pfam05425		No	Yes
638662184	8		EcolF_01002936	FALSE	FALSE	FALSE	FALSE		COG1276: Putative copper export protein	873	290		Escherichia coli O139:H28 F11 (ETEC)		COG1276	P	pfam05425		No	Yes
638667795	8		EcolE2_01004123	FALSE	FALSE	FALSE	FALSE		COG1276: Putative copper export protein	873	290		Escherichia coli E22 (EPEC)		COG1276	P	pfam05425		No	Yes
638671416	8		EcolE1_01002908	FALSE	FALSE	FALSE	FALSE		COG1276: Putative copper export protein	873	290		Escherichia coli O111:H9 E110019 (EPEC)		COG1276	P	pfam05425		No	Yes
638676957	8		EcolB_01003719	FALSE	FALSE	FALSE	FALSE		COG1276: Putative copper export protein	873	290		Escherichia coli O111:NM B171 (EPEC2)		COG1276	P	pfam05425		No	Yes
638728725	9		MtubC_01003364	FALSE	FALSE	FALSE	FALSE		hypothetical protein	1044	347		Mycobacterium tuberculosis C				pfam05425		Yes	Yes
638741082	4		PaerC_01000014	FALSE	FALSE	FALSE	FALSE		COG0041: Phosphoribosylcarboxyaminoimidazole (NCAIR) mutase	465	154		Pseudomonas aeruginosa C3719		COG5615	S	pfam05425		No	Yes
638745961	4		PaerC_01005005	FALSE	FALSE	FALSE	FALSE		COG1276: Putative copper export protein	435	144		Pseudomonas aeruginosa C3719				pfam05425		No	Yes
638746732	4		Paer2_01000014	FALSE	FALSE	FALSE	FALSE		COG0041: Phosphoribosylcarboxyaminoimidazole (NCAIR) mutase	465	154		Pseudomonas aeruginosa 2192		COG5615	S	pfam05425		No	Yes
638752053	4		Paer2_01005437	FALSE	FALSE	FALSE	FALSE		COG1276: Putative copper export protein	435	144		Pseudomonas aeruginosa 2192				pfam05425		No	Yes
638755028	8		BcenP_01002214	FALSE	FALSE	FALSE	FALSE		hypothetical protein	933	310		Burkholderia cenocepacia PC184		COG1276	P	pfam05425		No	Yes
638757055	8		BcenP_01004302	FALSE	FALSE	FALSE	FALSE		COG1276: Putative copper export protein	942	313		Burkholderia cenocepacia PC184		COG1276	P	pfam05425		No	Yes
638759571	8		BdolA_01000738	FALSE	FALSE	FALSE	FALSE		hypothetical protein	933	310		Burkholderia dolosa AUO158		COG1276	P	pfam05425		No	Yes
638759875	4		BdolA_01001051	FALSE	FALSE	FALSE	FALSE		COG5615: Predicted integral membrane protein	459	152		Burkholderia dolosa AUO158		COG5615	S	pfam05425		No	Yes
638773935	8		YberA_01000639	FALSE	FALSE	FALSE	FALSE		COG1276: Putative copper export protein	885	294		Yersinia bercovieri ATCC 43970		COG1276	P	pfam05425		No	Yes
638778999	8		YmolA_01002154	FALSE	FALSE	FALSE	FALSE		COG1276: Putative copper export protein	885	294		Yersinia mollaretii ATCC 43969		COG1276	P	pfam05425		No	Yes
638784450	8		YfreA_01003901	FALSE	FALSE	FALSE	FALSE		COG1276: Putative copper export protein	885	294		Yersinia frederiksenii ATCC 33641		COG1276	P	pfam05425		No	Yes
638784927	8		YintA_01000127	FALSE	FALSE	FALSE	FALSE		COG1276: Putative copper export protein	885	294		Yersinia intermedia ATCC 29909		COG1276	P	pfam05425		No	Yes
638849263	7		Bpse110_02000987	FALSE	FALSE	FALSE	FALSE		Putative copper export protein	945	314		Burkholderia pseudomallei 1106b		COG1276	P	pfam05425		No	Yes
638850154	3		Bpse110_02002149	FALSE	FALSE	FALSE	FALSE		Predicted integral membrane protein	393	130		Burkholderia pseudomallei 1106b		COG5615	S	pfam05425		No	Yes
638850441	8		Bpse110_02002438	FALSE	FALSE	FALSE	FALSE		Putative copper export protein	927	308		Burkholderia pseudomallei 1106b		COG1276	P	pfam05425		No	Yes
638868350	8		Ecol1_01003289	FALSE	FALSE	FALSE	FALSE		COG1276: Putative copper export protein	873	290		Escherichia coli 101-1		COG1276	P	pfam05425		No	Yes
638873725	4		Bpse4_03000537	FALSE	FALSE	FALSE	FALSE		Predicted integral membrane protein	435	144		Burkholderia pseudomallei 406e		COG5615	S	pfam05425		No	Yes
638876289	7		Bpse4_03003156	FALSE	FALSE	FALSE	FALSE		Putative copper export protein	945	314		Burkholderia pseudomallei 406e		COG1276	P	pfam05425		No	Yes
638877962	8		Bpse4_03004856	FALSE	FALSE	FALSE	FALSE		Putative copper export protein	927	308		Burkholderia pseudomallei 406e		COG1276	P	pfam05425		No	Yes
638879993	16		JNB_11559	FALSE	TRUE	FALSE	FALSE		hypothetical protein	1935	644		Janibacter sp. HTCC2649		COG1276 COG3336	P S	pfam05425 pfam09678		No	Yes
638883022	7		OB2597_05045	FALSE	FALSE	FALSE	FALSE		hypothetical protein	879	292		Oceanicola batsensis HTCC2597		COG1276	P	pfam05425		No	Yes
638886812	8		OB2597_16692	FALSE	FALSE	FALSE	FALSE		hypothetical protein	879	292		Oceanicola batsensis HTCC2597		COG1276	P	pfam05425		No	Yes
638913521	8		ROS217_02470	FALSE	FALSE	FALSE	FALSE		Putative copper export protein	963	320		Roseovarius sp. 217		COG1276	P	pfam05425		No	Yes
638917398	8		OS145_03918	FALSE	FALSE	FALSE	FALSE		Copper export protein	846	281		Idiomarina baltica OS145		COG1276	P	pfam05425		No	Yes
638932592	8		MED193_21931	FALSE	FALSE	FALSE	FALSE		Putative copper export protein	867	288		Roseobacter sp. MED193		COG1276	P	pfam05425		No	Yes
638944297	8		MED121_06735	FALSE	FALSE	FALSE	FALSE		Putative copper export protein	855	284		Marinomonas sp. MED121		COG1276	P	pfam05425		No	Yes
638969980	4		Bmal2_03000800	FALSE	FALSE	FALSE	FALSE		Predicted integral membrane protein	435	144		Burkholderia mallei 2002721280		COG5615	S	pfam05425		No	Yes
638973693	8		Bmal2_03004578	FALSE	FALSE	FALSE	FALSE		Putative copper export protein	927	308		Burkholderia mallei 2002721280		COG1276	P	pfam05425		No	Yes
638985889	16		A20C1_09479	FALSE	TRUE	FALSE	FALSE		hypothetical protein	1962	653		Agreia sp. PHSC20C1		COG3336	S	pfam05425 pfam09678		No	Yes
638999702	4		MED297_07581	FALSE	FALSE	FALSE	FALSE		hypothetical protein	462	153		Reinekea sp. MED297				pfam05425		No	Yes
639047057	7		OG2516_01411	FALSE	FALSE	FALSE	FALSE		hypothetical protein	879	292		Oceanicola granulosus HTCC2516		COG1276	P	pfam05425		No	Yes
639160541	8		SKA58_18575	FALSE	FALSE	FALSE	FALSE		Copper resistance D	945	314		Sphingomonas sp. SKA58		COG1276	P	pfam05425		No	Yes
639187975	4		PaerPA_01000744	FALSE	FALSE	FALSE	FALSE		hypothetical protein	435	144		Pseudomonas aeruginosa PACS2				pfam05425		No	Yes
639188737	4		PaerPA_01001513	FALSE	FALSE	FALSE	FALSE		Predicted integral membrane protein	465	154		Pseudomonas aeruginosa PACS2		COG5615	S	pfam05425		No	Yes
639303384	16		NCgl2370	FALSE	TRUE	FALSE	FALSE		hypothetical protein	2154	717		Corynebacterium glutamicum Nakagawa ATCC 13032		COG3336	S	pfam05425 pfam09678		No	Yes
639305417	8		BL01860	TRUE	FALSE	FALSE	TRUE	ycnJ	putative copper export protein YcnJ	1647	548		Bacillus licheniformis DSM 13 Novozymes		COG1276	P	pfam04234 pfam05425 pfam13115		Yes	Yes
639309672	8		BLi00480	TRUE	FALSE	FALSE	TRUE	ycnJ	YcnJ	1647	548		Bacillus licheniformis DSM 13 Goettingen		COG1276	P	pfam04234 pfam05425 pfam13115		Yes	Yes
639316947	16		cg2699	FALSE	TRUE	FALSE	FALSE		hypothetical protein	2154	717		Corynebacterium glutamicum Kalinowski ATCC 13032		COG3336	S	pfam05425 pfam09678		No	Yes
639319597	4		RPE_1974	FALSE	FALSE	FALSE	FALSE		Putative copper export protein-like protein	720	239		Rhodopseudomonas palustris BisA53				pfam05425		No	Yes
639326661	4		PA14_50850	FALSE	FALSE	FALSE	FALSE		hypothetical protein	465	154		Pseudomonas aeruginosa UCBPP-PA14		COG5615	S	pfam05425		No	Yes
639327521	4		PA14_61000	FALSE	FALSE	FALSE	FALSE		conserved hypothetical protein	435	144		Pseudomonas aeruginosa UCBPP-PA14				pfam05425		No	Yes
639647017	4		RL1135	FALSE	FALSE	FALSE	FALSE		putative transmembrane copper resistance protein	660	219		Rhizobium leguminosarum bv. viciae 3841				pfam05425		No	Yes
639687500	16		Arth_4446	FALSE	TRUE	FALSE	FALSE		copper resistance D domain protein	2094	697		Arthrobacter sp. FB24		COG1276 COG3336	P S	pfam05425 pfam09678		No	Yes
639691740	16		Arth_3915	FALSE	TRUE	FALSE	FALSE		copper resistance D domain protein	2157	718		Arthrobacter sp. FB24		COG3336	S	pfam05425 pfam09678		No	Yes
639694421	4		Bcen2424_2358	FALSE	FALSE	FALSE	FALSE		integral membrane protein-like protein	459	152		Burkholderia cenocepacia HI2424		COG5615	S	pfam05425		No	Yes
639694734	8		Bcen2424_2667	FALSE	FALSE	FALSE	FALSE		copper resistance D domain protein	933	310		Burkholderia cenocepacia HI2424		COG1276	P	pfam05425		No	Yes
639695476	8		Bcen2424_3417	FALSE	FALSE	FALSE	FALSE		copper resistance D domain protein	942	313		Burkholderia cenocepacia HI2424		COG1276	P	pfam05425		No	Yes
639706999	9		lwe2082	TRUE	FALSE	FALSE	FALSE		copper resistance domain protein	1626	541		Listeria welshimeri sv 6b, SLCC5334		COG1276	P	pfam04234 pfam05425		Yes	Yes
639720647	8		Shewana3_4290	FALSE	FALSE	FALSE	FALSE		copper resistance D domain protein	897	298		Shewanella sp. ANA-3		COG1276	P	pfam05425		No	Yes
639722903	3		Mmc1_2159	FALSE	FALSE	FALSE	FALSE		hypothetical protein	402	133		Magnetococcus sp. MC-1		COG5615	S	pfam05425		No	Yes
639735044	16		MAV_1692	FALSE	TRUE	FALSE	FALSE		ABC-type transporter, permease components	2070	689		Mycobacterium avium 104		COG1276 COG3336	P S	pfam05425 pfam09678		No	Yes
639743136	16		MSMEG_4702	FALSE	TRUE	FALSE	FALSE		ABC-type transporter, permease components	2001	666		Mycobacterium smegmatis MC2 155		COG1276 COG3336	P S	pfam05425 pfam09678		No	Yes
639744847	9		MSMEG_6437	FALSE	FALSE	FALSE	FALSE		copper resistance protein D	930	309		Mycobacterium smegmatis MC2 155		COG1276	P	pfam05425		No	Yes
639748876	9		BALH_1692	TRUE	FALSE	FALSE	TRUE		possible copper resistance protein	1650	549		Bacillus thuringiensis Al Hakam		COG1276	P	pfam04234 pfam05425 pfam13115		Yes	Yes
639766479	4		Cpha266_1897	FALSE	FALSE	FALSE	FALSE		hypothetical protein	438	145		Chlorobium phaeobacteroides DSM 266				pfam05425		No	Yes
639772311	9		Pden_5008	TRUE	FALSE	FALSE	FALSE		copper resistance protein CopC	1542	513		Paracoccus denitrificans PD1222		COG1276	P	pfam04234 pfam05425		No	Yes
639787042	4		azo1894	FALSE	FALSE	FALSE	FALSE		conserved hypothetical membrane protein	456	151		Azoarcus sp. BH72		COG5615	S	pfam05425		No	Yes
639789341	16		Mkms_5682	FALSE	TRUE	FALSE	FALSE		copper resistance D domain protein	1926	641		Mycobacterium sp. KMS		COG1276 COG3336	P S	pfam05425 pfam09678		Yes	Yes
639793368	16		Mkms_3690	FALSE	TRUE	FALSE	FALSE		copper resistance D domain protein	1998	665		Mycobacterium sp. KMS		COG1276 COG3336	P S	pfam05425 pfam09678		No	Yes
639794838	9		Mkms_5141	FALSE	FALSE	FALSE	FALSE		copper resistance D domain protein	930	309		Mycobacterium sp. KMS		COG1276	P	pfam05425		No	Yes
639796597	8		Ping_1389	FALSE	FALSE	FALSE	FALSE		copper resistance D domain protein	891	296		Psychromonas ingrahamii 37		COG1276	P	pfam05425		No	Yes
639802509	16		AAur_3742	FALSE	TRUE	FALSE	FALSE		putative copper resistance protein D family	2256	751		Arthrobacter aurescens TC1		COG1276 COG3336	P S	pfam05425 pfam09678		No	Yes
639803154	16		AAur_pTC10194	FALSE	TRUE	FALSE	FALSE		putative Copper resistance protein, D-family	1863	620		Arthrobacter aurescens TC1		COG1276 COG3336	P S	pfam05425 pfam09678		No	Yes
639803295	16		AAur_pTC20042	FALSE	TRUE	FALSE	FALSE		putative copper resistance membrane protein (CopD)	2106	701		Arthrobacter aurescens TC1		COG1276 COG3336	P S	pfam05425 pfam09678		No	Yes
639807160	16		Mvan_3692	FALSE	TRUE	FALSE	FALSE		copper resistance D domain protein	1929	642		Mycobacterium vanbaalenii PYR-1		COG1276 COG3336	P S	pfam05425 pfam09678		Yes	Yes
639807537	16		Mvan_4073	FALSE	TRUE	FALSE	FALSE		copper resistance D domain protein	2019	672		Mycobacterium vanbaalenii PYR-1		COG1276 COG3336	P S	pfam05425 pfam09678		No	Yes
639809156	9		Mvan_5680	FALSE	FALSE	FALSE	FALSE		copper resistance D domain protein	924	307		Mycobacterium vanbaalenii PYR-1		COG1276	P	pfam05425		Yes	Yes
639829038	16		BCG_0135	FALSE	TRUE	FALSE	FALSE		putative integral membrane protein	1986	661		Mycobacterium bovis BCG Pasteur 1173P2		COG3336	S	pfam05425 pfam09678		No	Yes
639833240	4		Pnap_0247	FALSE	FALSE	FALSE	FALSE		hypothetical protein	444	147		Polaromonas naphthalenivorans CJ2		COG5615	S	pfam05425		No	Yes
639838719	4		Ajs_1629	FALSE	FALSE	FALSE	FALSE		hypothetical protein	480	159		Acidovorax sp. JS42		COG5615	S	pfam05425		No	Yes
639840208	3		Ajs_3166	FALSE	FALSE	FALSE	FALSE		hypothetical protein	447	148		Acidovorax sp. JS42				pfam05425		No	Yes
639844970	4		BMASAVP1_A0696	FALSE	FALSE	FALSE	FALSE		hypothetical protein	459	152		Burkholderia mallei SAVP1		COG5615	S	pfam05425		No	Yes
639846953	8		BMASAVP1_A2695	FALSE	FALSE	FALSE	FALSE		putative copper resistance protein	927	308		Burkholderia mallei SAVP1		COG1276	P	pfam05425		No	Yes
639868380	5		FP2506_04306	FALSE	FALSE	FALSE	FALSE		Putative copper export protein	633	210		Fulvimarina pelagi HTCC2506				pfam05425		No	Yes
639869132	8		FP2506_00025	FALSE	FALSE	FALSE	FALSE		Putative copper export protein	906	301		Fulvimarina pelagi HTCC2506		COG1276	P	pfam05425		No	Yes
640056498	16		PBD2.098	FALSE	TRUE	FALSE	FALSE		putative copper export protein	2031	676		Rhodococcus erythropolis BD2 plasmid pBD2		COG1276 COG3336	P S	pfam05425 pfam09678		No	Yes
640075333	8		YE1797	FALSE	FALSE	FALSE	FALSE		putative copper resistance protein D	885	294		Yersinia enterocolitica enterocolitica 8081		COG1276	P	pfam05425		No	Yes
640086862	4		P9303_13541	FALSE	FALSE	FALSE	FALSE		hypothetical protein	444	147		Prochlorococcus marinus MIT 9303				pfam05425		No	Yes
640090285	4		Mpe_A1714	FALSE	FALSE	FALSE	FALSE		hypothetical protein	477	158		Methylibium petroleiphilum PM1		COG5615	S	pfam05425		No	Yes
640097625	8		BMA10299_A2382	FALSE	FALSE	FALSE	FALSE		putative copper resistance protein	927	308		Burkholderia mallei NCTC 10229		COG1276	P	pfam05425		No	Yes
640097770	4		BMA10299_A2530	FALSE	FALSE	FALSE	FALSE		hypothetical protein	459	152		Burkholderia mallei NCTC 10229		COG5615	S	pfam05425		No	Yes
640126667	8		BURPS668_0739	FALSE	FALSE	FALSE	FALSE		copper resistance family protein	927	308		Burkholderia pseudomallei 668		COG1276	P	pfam05425		No	Yes
640127069	4		BURPS668_1141	FALSE	FALSE	FALSE	FALSE		hypothetical protein	459	152		Burkholderia pseudomallei 668		COG5615	S	pfam05425		No	Yes
640130657	7		BURPS668_A0717	FALSE	FALSE	FALSE	FALSE		putative copper resistance protein D	945	314		Burkholderia pseudomallei 668		COG1276	P	pfam05425		No	Yes
640133981	8		BURPS1106A_0751	FALSE	FALSE	FALSE	FALSE		copper resistance family protein	927	308		Burkholderia pseudomallei 1106a		COG1276	P	pfam05425		No	Yes
640134379	4		BURPS1106A_1149	FALSE	FALSE	FALSE	FALSE		hypothetical protein	459	152		Burkholderia pseudomallei 1106a		COG5615	S	pfam05425		No	Yes
640140928	16		Mjls_3622	FALSE	TRUE	FALSE	FALSE		copper resistance D domain protein	1998	665		Mycobacterium sp. JLS		COG1276 COG3336	P S	pfam05425 pfam09678		No	Yes
640141788	8		Mjls_4480	TRUE	FALSE	FALSE	FALSE		copper resistance protein CopC	1899	632		Mycobacterium sp. JLS		COG2372	R	pfam04234 pfam05425		Yes	Yes
640142749	9		Mjls_5432	FALSE	FALSE	FALSE	FALSE		copper resistance D domain protein	930	309		Mycobacterium sp. JLS		COG1276	P	pfam05425		No	Yes
640143731	8		BURPS1106A_A0625	FALSE	FALSE	FALSE	FALSE		putative copper resistance protein D	948	315		Burkholderia pseudomallei 1106a		COG1276	P	pfam05425		No	Yes
640150739	4		BMA10247_2084	FALSE	FALSE	FALSE	FALSE		hypothetical protein	459	152		Burkholderia mallei NCTC 10247		COG5615	S	pfam05425		No	Yes
640151115	8		BMA10247_2463	FALSE	FALSE	FALSE	FALSE		putative copper resistance protein	927	308		Burkholderia mallei NCTC 10247		COG1276	P	pfam05425		No	Yes
640155117	8		A1S_2941	FALSE	FALSE	FALSE	FALSE		Copper resistance D	894	297		Acinetobacter baumannii ATCC 17978		COG1276	P	pfam05425		No	Yes
640167885	8		HEAR0544	FALSE	FALSE	FALSE	FALSE		COPPER RESISTANCE D TRANSMEMBRANE PROTEIN like	936	311		Herminiimonas arsenicoxydans ULPAs1		COG1276	P	pfam05425		No	Yes
640168864	8		HEAR1548	FALSE	FALSE	FALSE	FALSE	copD	Copper resistance protein D	921	306		Herminiimonas arsenicoxydans ULPAs1		COG1276	P	pfam05425		No	Yes
640170282	3		HEAR3006	FALSE	FALSE	FALSE	FALSE		hypothetical protein	447	148		Herminiimonas arsenicoxydans ULPAs1		COG5615	S	pfam05425		No	Yes
640171423	9		SACE_0677	FALSE	FALSE	FALSE	FALSE		probable copper resistance transporter	1056	351		Saccharopolyspora erythraea NRRL 2338		COG1276	P	pfam05425		No	Yes
640172062	16		SACE_1321	FALSE	TRUE	FALSE	FALSE		probable copper resistance transporter	2025	674		Saccharopolyspora erythraea NRRL 2338		COG1276 COG3336	P S	pfam05425 pfam09678		Yes	Yes
640173721	16		SACE_3011	FALSE	TRUE	FALSE	FALSE		probable copper resistance transporter	1845	614		Saccharopolyspora erythraea NRRL 2338		COG1276 COG3336	P S	pfam05425 pfam09678		No	Yes
640177234	14		SACE_6621	FALSE	TRUE	FALSE	FALSE		probable copper resistance transporter	1908	635		Saccharopolyspora erythraea NRRL 2338		COG3336	S	pfam05425 pfam09678		No	Yes
640179870	4		Dred_0696	FALSE	FALSE	FALSE	FALSE		hypothetical protein	483	160		Desulfotomaculum reducens MI-1		COG5615	S	pfam05425		No	No
640184297	8		Bcep1808_3974	FALSE	FALSE	FALSE	FALSE		copper resistance D domain protein	942	313		Burkholderia vietnamiensis G4		COG1276	P	pfam05425		No	Yes
640188226	4		Bcep1808_2445	FALSE	FALSE	FALSE	FALSE		integral membrane protein-like protein	459	152		Burkholderia vietnamiensis G4		COG5615	S	pfam05425		No	Yes
640188556	7		Bcep1808_2779	FALSE	FALSE	FALSE	FALSE		copper resistance D domain protein	936	311		Burkholderia vietnamiensis G4		COG1276	P	pfam05425		No	Yes
640429107	8		SSON_1308	FALSE	FALSE	FALSE	FALSE		putative resistance protein	873	290		Shigella sonnei Ss046		COG1276	P	pfam05425		No	Yes
640433511	6		SDY_1126	FALSE	FALSE	FALSE	FALSE		putative resistance protein	669	222		Shigella dysenteriae Sd197		COG1276	P	pfam05425		No	Yes
640442665	9		RHE_PF00512	TRUE	FALSE	FALSE	FALSE		putative copper export protein	1602	533		Rhizobium etli CFN 42, DSM 11541		COG1276	P	pfam04234 pfam05425		Yes	Yes
640444896	8		Saro_2141	FALSE	FALSE	FALSE	FALSE		copper resistance D	933	310		Novosphingobium aromaticivorans DSM 12444		COG1276	P	pfam05425		No	Yes
640445702	8		Saro_2924	FALSE	FALSE	FALSE	FALSE		copper resistance D	855	284		Novosphingobium aromaticivorans DSM 12444		COG1276	P	pfam05425		No	Yes
640448606	4		H16_A2516	FALSE	FALSE	FALSE	FALSE	h16_A2516	hypothetical membrane spanning protein	528	175		Ralstonia eutropha H16		COG5615	S	pfam05425		No	Yes
640452005	8		H16_B2182	FALSE	FALSE	FALSE	FALSE	copD	copper resistance protein D, transmembrane component	915	304		Ralstonia eutropha H16		COG1276	P	pfam05425		No	Yes
640455322	8		Mflv_1126	FALSE	FALSE	FALSE	FALSE		copper resistance D domain protein	894	297		Mycobacterium gilvum PYR-GCK		COG1276	P	pfam05425		No	Yes
640456782	16		Mflv_2566	FALSE	TRUE	FALSE	FALSE		copper resistance D domain protein	2031	676		Mycobacterium gilvum PYR-GCK		COG3336	S	pfam05425 pfam09678		Yes	Yes
640457047	16		Mflv_2826	FALSE	TRUE	FALSE	FALSE		copper resistance D domain protein	1941	646		Mycobacterium gilvum PYR-GCK		COG3336	S	pfam05425 pfam09678		No	Yes
640459556	16		Mflv_5328	FALSE	TRUE	FALSE	FALSE		copper resistance D domain protein	1926	641		Mycobacterium gilvum PYR-GCK		COG3336	S	pfam05425 pfam09678		Yes	Yes
640459593	16		Mflv_5367	FALSE	TRUE	FALSE	FALSE		copper resistance D domain protein	1914	637		Mycobacterium gilvum PYR-GCK		COG3336	S	pfam05425 pfam09678		Yes	Yes
640459994	16		cgR_0143	FALSE	TRUE	FALSE	FALSE		Predicted membrane protein	2022	673		Corynebacterium glutamicum R		COG3336	S	pfam05425 pfam09678		No	Yes
640462299	16		cgR_2359	FALSE	TRUE	FALSE	FALSE		Predicted membrane protein	2154	717		Corynebacterium glutamicum R		COG3336	S	pfam05425 pfam09678		No	Yes
640472439	16		Strop_0172	FALSE	TRUE	FALSE	FALSE		copper resistance D domain protein	1956	651		Salinispora tropica CNB-440		COG1276 COG3336	P S	pfam05425 pfam09678		No	Yes
640473390	9		Strop_1122	TRUE	FALSE	FALSE	FALSE		copper resistance protein CopC	1824	607		Salinispora tropica CNB-440		COG1276	P	pfam04234 pfam05425		No	Yes
640478188	8		YPDSF_1338	FALSE	FALSE	FALSE	FALSE		copper resistance protein D	885	294		Yersinia pestis Pestoides F		COG1276	P	pfam05425		No	Yes
640486902	4		PST_0944	FALSE	FALSE	FALSE	FALSE		putative copper export protein	435	144		Pseudomonas stutzeri A1501				pfam05425		No	Yes
640487475	4		PST_1522	FALSE	FALSE	FALSE	FALSE		predicted integral membrane protein	465	154		Pseudomonas stutzeri A1501		COG5615	S	pfam05425		No	Yes
640492594	8		Ent638_2411	FALSE	FALSE	FALSE	FALSE		copper resistance D domain protein	873	290		Enterobacter sp. 638		COG1276	P	pfam05425		No	Yes
640502655	4		Pmen_1426	FALSE	FALSE	FALSE	FALSE		integral membrane protein-like protein	465	154		Pseudomonas mendocina ymp		COG5615	S	pfam05425		No	Yes
640520405	13		BRADO2756	FALSE	FALSE	FALSE	FALSE		putative Copper resistance protein, copD family.	1659	552		Bradyrhizobium sp. ORS278		COG1276	P	pfam05425		No	Yes
640521748	9		BRADO4155	TRUE	FALSE	FALSE	FALSE		putative Copper resistance protein; putative fusion protein containing a copC-like domain (N-ter) and a copD-like domain (C-ter)	1572	523		Bradyrhizobium sp. ORS278		COG1276	P	pfam04234 pfam05425		Yes	Yes
640539029	8		BBta_p0114	FALSE	FALSE	FALSE	FALSE	copD	Copper resistance protein D	930	309		Bradyrhizobium sp. BTAi1		COG1276	P	pfam05425		No	Yes
640542285	16		CMM_2933	FALSE	TRUE	FALSE	FALSE		conserved membrane protein, putative copper export protein	1980	659		Clavibacter michiganensis michiganensis NCPPB 382		COG1276 COG3336	P S	pfam05425 pfam09678		Yes	Yes
640557425	10		BBta_2513	FALSE	FALSE	FALSE	FALSE		hypothetical protein	1866	621		Bradyrhizobium sp. BTAi1		COG1276	P	pfam05425		No	Yes
640560183	13		BBta_5430	FALSE	FALSE	FALSE	FALSE		putative Copper resistance protein, copD family	1659	552		Bradyrhizobium sp. BTAi1		COG1276	P	pfam05425		No	Yes
640582173	8		Swit_2617	FALSE	FALSE	FALSE	FALSE		copper resistance D domain protein	873	290		Sphingomonas wittichii RW1		COG1276	P	pfam05425		No	Yes
640585618	4		Pput_1160	FALSE	FALSE	FALSE	FALSE		integral membrane protein-like protein	465	154		Pseudomonas putida F1		COG5615	S	pfam05425		No	Yes
640595109	9		RoseRS_1500	TRUE	FALSE	FALSE	FALSE		copper resistance protein CopC	1773	590		Roseiflexus sp. RS-1		COG1276	P	pfam04234 pfam05425		Yes	Yes
640598985	4		PsycPRwf_0764	FALSE	FALSE	FALSE	FALSE		hypothetical protein	441	146		Psychrobacter sp. PRwf-1				pfam05425		No	Yes
640600764	16		MRA_0107	FALSE	TRUE	FALSE	FALSE		putative conserved integral membrane protein	1986	661		Mycobacterium tuberculosis H37Ra		COG3336	S	pfam05425 pfam09678		No	Yes
640604843	16		TBFG_10103	FALSE	TRUE	FALSE	FALSE		conserved integral membrane protein	1986	661		Mycobacterium tuberculosis F11 (ExPEC)		COG3336	S	pfam05425 pfam09678		No	Yes
640635835	4		MELB17_15292	FALSE	FALSE	FALSE	FALSE		hypothetical protein	456	151		Marinobacter sp. ELB17		COG5615	S	pfam05425		No	Yes
640636205	8		MELB17_10298	FALSE	FALSE	FALSE	FALSE		Putative copper export protein	903	300		Marinobacter sp. ELB17		COG1276	P	pfam05425		No	Yes
640640126	4		RB2150_17224	FALSE	FALSE	FALSE	FALSE		Putative copper export protein	498	165		Rhodobacterales sp. HTCC2150				pfam05425		No	Yes
640653234	8		RSK20926_14044	FALSE	FALSE	FALSE	FALSE		Putative copper export protein	867	288		Roseobacter sp. SK209-2-6		COG1276	P	pfam05425		No	Yes
640657501	8		BURPS305_4568	FALSE	FALSE	FALSE	FALSE		copper resistance family protein	927	308		Burkholderia pseudomallei MSHR305		COG1276	P	pfam05425		No	Yes
640660901	8		BURPS305_7822	FALSE	FALSE	FALSE	FALSE		putative copper resistance protein D	948	315		Burkholderia pseudomallei MSHR305		COG1276	P	pfam05425		No	Yes
640738300	8		SF1851	FALSE	FALSE	FALSE	FALSE			873	289		Shigella flexneri 2a 301				pfam05425		No	Yes
640742002	8		S1916	FALSE	FALSE	FALSE	FALSE			873	289		Shigella flexneri 2a 2457T				pfam05425		No	Yes
640754732	8		APECO1_893	FALSE	FALSE	FALSE	FALSE	yebZ	hypothetical protein	873	290		Escherichia coli O1:K1:H7 (APEC)		COG1276	P	pfam05425		No	Yes
640799398	8		KPN_02357	FALSE	FALSE	FALSE	FALSE	yebZ	putative resistance protein	870	289		Klebsiella pneumoniae pneumoniae MGH78578		COG1276	P	pfam05425		No	Yes
640802012	8		KPN_pKPN3p05938	FALSE	FALSE	FALSE	FALSE	pcoD	copper resistant protein PcoD	930	309		Klebsiella pneumoniae pneumoniae MGH78578		COG1276	P	pfam05425		No	Yes
640813384	4		PSPA7_4335	FALSE	FALSE	FALSE	FALSE		hypothetical protein	465	154		Pseudomonas aeruginosa PA7		COG5615	S	pfam05425		No	Yes
640814296	4		PSPA7_5250	FALSE	FALSE	FALSE	FALSE		hypothetical protein	435	144		Pseudomonas aeruginosa PA7				pfam05425		No	Yes
640816230	8		mma_0798	FALSE	FALSE	FALSE	FALSE	copD1	copper resistance protein D	933	310		Janthinobacterium sp. Marseille		COG1276	P	pfam05425		No	Yes
640817177	8		mma_1726	FALSE	FALSE	FALSE	FALSE	copD2	copper resistance protein D	921	306		Janthinobacterium sp. Marseille		COG1276	P	pfam05425		No	Yes
640818715	4		mma_3255	FALSE	FALSE	FALSE	FALSE		hypothetical protein	447	148		Janthinobacterium sp. Marseille		COG5615	S	pfam05425		No	Yes
640827944	16		Krad_4275	FALSE	TRUE	FALSE	FALSE		copper resistance D domain protein	2016	671		Kineococcus radiotolerans SRS30216		COG1276 COG3336	P S	pfam05425 pfam09678		No	Yes
640865327	8		YpsIP31758_2338	FALSE	FALSE	FALSE	FALSE	copD	copper resistance protein D	885	294		Yersinia pseudotuberculosis IP 31758		COG1276	P	pfam05425		No	Yes
640871467	4		CCV52592_2050	FALSE	FALSE	FALSE	FALSE		hypothetical protein	444	147		Campylobacter curvus 525.92		COG3399	S	pfam05425		No	Yes
640879666	10		Xaut_0419	TRUE	FALSE	FALSE	FALSE		copper resistance D domain protein	1731	576		Xanthobacter autotrophicus Py2		COG1276	P	pfam04234 pfam05425		No	Yes
640884468	9		RBAM_004200	TRUE	FALSE	FALSE	TRUE	ycnJ	YcnJ	1629	542		Bacillus amyloliquefaciens plantarum FZB42		COG1276	P	pfam04234 pfam05425 pfam13115		Yes	Yes
640894757	9		Rcas_2633	TRUE	FALSE	FALSE	FALSE		copper resistance protein CopC	1842	613		Roseiflexus castenholzii HLO8, DSM 13941		COG1276	P	pfam04234 pfam05425		No	Yes
640899553	8		ESA_01400	FALSE	FALSE	FALSE	FALSE		Putative copper export protein	870	289		Cronobacter sakazakii ATCC BAA-894		COG1276	P	pfam05425		No	Yes
640902400	8		ESA_04252	FALSE	FALSE	FALSE	FALSE		Putative copper export protein	930	309		Cronobacter sakazakii ATCC BAA-894		COG1276	P	pfam05425		No	Yes
640915092	8		CKO_01126	FALSE	FALSE	FALSE	FALSE		Putative copper export protein	873	290		Citrobacter koseri ATCC BAA-895		COG1276	P	pfam05425		No	Yes
640921076	8		EcHS_A1931	FALSE	FALSE	FALSE	FALSE		copper resistance protein D	873	290		Escherichia coli O9 HS		COG1276	P	pfam05425		No	No
640925739	8		EcE24377A_2069	FALSE	FALSE	FALSE	FALSE		copper resistance protein D	873	290		Escherichia coli O139:H28 E24377A (ETEC)		COG1276	P	pfam05425		No	Yes
640930641	16		Krad_4566	FALSE	TRUE	FALSE	FALSE		putative copper resistance protein D	2220	739		Kineococcus radiotolerans SRS30216		COG3336	S	pfam05425 pfam09678		No	Yes
640937482	8		Spro_1944	FALSE	FALSE	FALSE	FALSE		copper resistance D domain protein	882	293		Serratia proteamaculans 568		COG1276	P	pfam05425		No	Yes
640940806	8		APECO1_O1R121	FALSE	FALSE	FALSE	FALSE	pcoD	PcoD	930	309		Escherichia coli O1:K1:H7 (APEC)		COG1276	P	pfam05425		No	Yes
640944993	9		BPUM_0368	TRUE	FALSE	FALSE	TRUE	ycnJ	possible copper (Cu) export protein	1635	544		Bacillus pumilus SAFR-032		COG1276	P	pfam04234 pfam05425 pfam13115		Yes	Yes
640965012	9		LMHG_02367	TRUE	FALSE	FALSE	FALSE		hypothetical protein	1626	541		Listeria monocytogenes FSL N1-017		COG1276 COG2372	P R	pfam04234 pfam05425		Yes	Yes
640967735	9		LMIG_00709	TRUE	FALSE	FALSE	FALSE		hypothetical protein	1626	541		Listeria monocytogenes FSL N3-165		COG1276 COG2372	P R	pfam04234 pfam05425		Yes	Yes
640983124	9		LMSG_02721	TRUE	FALSE	FALSE	FALSE		hypotehtical protein	1626	541		Listeria monocytogenes HPB2262		COG1276 COG2372	P R	pfam04234 pfam05425		Yes	Yes
641104154	8		YPE_1478	FALSE	FALSE	FALSE	FALSE		putative copper resistance protein D	885	294		Yersinia pestis CA88-4125		COG1276	P	pfam05425		No	Yes
641121373	3		VSAK1_23699	FALSE	FALSE	FALSE	FALSE		hypothetical protein	444	147		Vibrio shilonii AK1				pfam05425		No	Yes
641146603	4		MDG893_02780	FALSE	FALSE	FALSE	FALSE		hypothetical protein	456	151		Marinobacter algicola DG893		COG5615	S	pfam05425		No	Yes
641210696	8		SMR0156	FALSE	FALSE	FALSE	FALSE	copD	copper resistance protein	930	309		Serratia marcescens plasmid R478		COG1276	P	pfam05425		No	Yes
641211291	8		LV164	FALSE	FALSE	FALSE	FALSE	pcoD	copper resistant protein PcoD	930	309		Klebsiella pneumoniae CG43 plasmid pLVPK		COG1276	P	pfam05425		No	Yes
641230143	3		Dgeo_1128	FALSE	FALSE	FALSE	FALSE		putative copper resistance protein D	348	115		Deinococcus geothermalis DSM 11300				pfam05425		No	Yes
641241388	16		Franean1_2471	FALSE	TRUE	FALSE	FALSE		hypothetical protein	2160	719		Frankia sp. EAN1pec		COG1276 COG3336	P S	pfam05425 pfam09678		Yes	Yes
641246078	9		Franean1_7241	TRUE	FALSE	FALSE	FALSE		copper resistance protein CopC	1950	649		Frankia sp. EAN1pec		COG1276	P	pfam04234 pfam05425		No	Yes
641249603	4		AM1_0484	FALSE	FALSE	FALSE	FALSE		hypothetical protein	447	148		Acaryochloris marina MBIC11017				pfam05425		No	Yes
641269712	16		Sare_0186	FALSE	TRUE	FALSE	FALSE		copper resistance D domain protein	2040	679		Salinispora arenicola CNS-205		COG1276 COG3336	P S	pfam05425 pfam09678		No	Yes
641270472	9		Sare_0957	TRUE	FALSE	FALSE	FALSE		copper resistance D domain protein	1533	510		Salinispora arenicola CNS-205				pfam04234 pfam05425		Yes	Yes
641270529	9		Sare_1013	TRUE	FALSE	FALSE	FALSE		copper resistance protein CopC	1656	551		Salinispora arenicola CNS-205		COG1276	P	pfam04234 pfam05425		Yes	Yes
641295507	8		Daci_0444	FALSE	FALSE	FALSE	FALSE		copper resistance D domain protein	927	308		Delftia acidovorans SPH-1		COG1276	P	pfam05425		No	Yes
641304241	8		SARI_01072	FALSE	FALSE	FALSE	FALSE		Putative copper export protein	876	291		Salmonella enterica arizonae sv 62:z4,z23 RSK2980		COG1276	P	pfam05425		No	Yes
641307959	8		Bmul_6288	FALSE	FALSE	FALSE	FALSE		copper resistance D domain protein	942	313		Burkholderia multivorans ATCC 17616		COG1276	P	pfam05425		No	Yes
641313044	8		Bmul_0630	FALSE	FALSE	FALSE	FALSE		hypothetical protein	933	310		Burkholderia multivorans ATCC 17616		COG1276	P	pfam05425		No	Yes
641313334	4		Bmul_0921	FALSE	FALSE	FALSE	FALSE		integral membrane protein-like protein	459	152		Burkholderia multivorans ATCC 17616		COG5615	S	pfam05425		No	Yes
641314785	8		Bmul_2341	FALSE	FALSE	FALSE	FALSE		copper resistance D domain protein	954	317		Burkholderia multivorans ATCC 17616		COG1276	P	pfam05425		No	Yes
641317306	9		Nmar_1652	TRUE	FALSE	FALSE	FALSE		copper resistance D domain protein	2784	927	arAOB	Nitrosopumilus maritimus SCM1		COG1276 COG2372 COG4257	P R V	pfam04234 pfam05425		Yes	Yes
641317388	4		Nmar_1734	FALSE	FALSE	FALSE	FALSE		hypothetical protein	498	165	arAOB	Nitrosopumilus maritimus SCM1		COG5615	S	pfam05425		No	Yes
641321734	8		SPAB_01295	FALSE	FALSE	FALSE	FALSE		Putative copper export protein	876	291		Salmonella enterica enterica sv Paratyphi B, SPB7		COG1276	P	pfam05425		No	Yes
641337000	4		GDI3047	FALSE	FALSE	FALSE	FALSE		putative integral membrane protein	453	150		Gluconacetobacter diazotrophicus PAl 5, DSM 5601		COG5615	S	pfam05425		No	Yes
641339568	8		YpAngola_A1622	FALSE	FALSE	FALSE	FALSE	copD	copper resistance protein D	885	294		Yersinia pestis Angola		COG1276	P	pfam05425		No	Yes
641357993	16		RSal33209_2821	FALSE	TRUE	FALSE	FALSE		copper resistance protein D	2106	701		Renibacterium salmoninarum ATCC 33209		COG1276 COG3336	P S	pfam05425 pfam09678		No	Yes
641364555	3		Bpet3799	FALSE	FALSE	FALSE	FALSE		hypothetical protein	405	134		Bordetella petrii Se-1111R, DSM 12804				pfam05425		No	Yes
641365349	8		Bpet4584	FALSE	FALSE	FALSE	FALSE		putative copper resistance protein D	918	305		Bordetella petrii Se-1111R, DSM 12804		COG1276	P	pfam05425		No	Yes
641376969	9		BcerKBAB4_1786	TRUE	FALSE	FALSE	TRUE		copper resistance D domain protein	1644	547		Bacillus weihenstephanensis KBAB4		COG1276	P	pfam04234 pfam05425 pfam13115		Yes	Yes
641431432	4		BAL199_26711	FALSE	FALSE	FALSE	FALSE		hypothetical protein	462	153		Nisaea sp BAL199		COG5615	S	pfam05425		No	Yes
641549425	4		PputGB1_4291	FALSE	FALSE	FALSE	FALSE		hypothetical protein	465	154		Pseudomonas putida GB-1		COG5615	S	pfam05425		No	Yes
641562837	8		Caul_2346	FALSE	FALSE	FALSE	FALSE		copper resistance D domain protein	918	305		Caulobacter sp. K31		COG1276	P	pfam05425		No	Yes
641579286	16		MAB_1557	FALSE	TRUE	FALSE	FALSE		Copper resistance D precursor	2010	669		Mycobacterium abscessus CIP 104536		COG1276 COG3336	P S	pfam05425 pfam09678		No	Yes
641591877	8		ABAYE3207	FALSE	FALSE	FALSE	FALSE	copD	Copper resistance protein D	915	304		Acinetobacter baumannii AYE		COG1276	P	pfam05425		No	Yes
641597502	8		YPK_2436	FALSE	FALSE	FALSE	FALSE		copper resistance D domain protein	885	294		Yersinia pseudotuberculosis YPIII		COG1276	P	pfam05425		No	Yes
641601207	8		EcolC_1792	FALSE	FALSE	FALSE	FALSE		copper resistance D domain protein	873	290		Escherichia coli C ATCC 8739		COG1276	P	pfam05425		No	Yes
641602825	8		EcolC_3413	FALSE	FALSE	FALSE	FALSE		copper resistance D domain protein	930	309		Escherichia coli C ATCC 8739		COG1276	P	pfam05425		No	No
641607450	8		ECDH10B_1981	FALSE	FALSE	FALSE	FALSE	yebZ	predicted inner membrane protein	873	290		Escherichia coli DH10B		COG1276	P	pfam05425		No	No
641616225	8		EcSMS35_1347	FALSE	FALSE	FALSE	FALSE		copper resistance protein D	873	290		Escherichia coli SECEC SMS-3-5		COG1276	P	pfam05425		No	Yes
641620910	4		PputW619_1145	FALSE	FALSE	FALSE	FALSE		hypothetical protein	465	154		Pseudomonas putida W619		COG5615	S	pfam05425		No	Yes
641638968	4		Bcenmc03_2379	FALSE	FALSE	FALSE	FALSE		integral membrane protein-like protein	459	152		Burkholderia cenocepacia MC0-3		COG5615	S	pfam05425		No	Yes
641639289	8		Bcenmc03_2696	FALSE	FALSE	FALSE	FALSE		copper resistance D domain protein	933	310		Burkholderia cenocepacia MC0-3		COG1276	P	pfam05425		No	Yes
641651207	8		Bcenmc03_4099	FALSE	FALSE	FALSE	FALSE		copper resistance D domain protein	942	313		Burkholderia cenocepacia MC0-3		COG1276	P	pfam05425		No	Yes
641673804	16		cu1391	FALSE	TRUE	FALSE	FALSE		hypothetical protein	2301	766		Corynebacterium urealyticum DSM 7109		COG3336	S	pfam05425 pfam09678		No	Yes
641682049	4		BamMC406_2276	FALSE	FALSE	FALSE	FALSE		integral membrane protein-like protein	459	152		Burkholderia ambifaria MC40-6		COG5615	S	pfam05425		No	Yes
641682368	8		BamMC406_2592	FALSE	FALSE	FALSE	FALSE		copper resistance D domain protein	933	310		Burkholderia ambifaria MC40-6		COG1276	P	pfam05425		No	Yes
641683125	8		BamMC406_3356	FALSE	FALSE	FALSE	FALSE		copper resistance D domain protein	921	306		Burkholderia ambifaria MC40-6		COG1276	P	pfam05425		No	Yes
641696397	8		SGR_2083	FALSE	FALSE	FALSE	FALSE		hypothetical protein	1050	349		Streptomyces griseus griseus NBRC 13350		COG1276	P	pfam05425		No	Yes
641697956	8		SGR_3627	TRUE	FALSE	FALSE	FALSE		putative integral membrane protein	1947	648		Streptomyces griseus griseus NBRC 13350		COG2372	R	pfam04234 pfam05425		Yes	Yes
641707428	8		Bind_3474	FALSE	FALSE	FALSE	FALSE		copper resistance D domain protein	951	316		Beijerinckia indica indica ATCC 9039		COG1276	P	pfam05425		No	Yes
641726151	8		SbBS512_E2115	FALSE	FALSE	FALSE	FALSE		copper resistance protein D	873	290		Shigella boydii BS512, CDC 3083-94		COG1276	P	pfam05425		No	Yes
641735578	4		CENSYa_1553	FALSE	FALSE	FALSE	FALSE		copper export protein	510	169	arAOB	Cenarchaeum symbiosum A				pfam05425		No	Yes
641735823	10		CENSYa_1798	TRUE	FALSE	FALSE	FALSE		streptogramin lyase	2784	927	arAOB	Cenarchaeum symbiosum A		COG1276 COG4257	P V	pfam04234 pfam05425 pfam08450		Yes	Yes
641743233	8		Plarl_010100014009	TRUE	FALSE	FALSE	FALSE		YcnJ	1671	556		Paenibacillus larvae larvae BRL-230010		COG1276	P	pfam04234 pfam05425		No	Yes
641762633	9		LmonFSL_020100013081	TRUE	FALSE	FALSE	FALSE		copper resistance domain protein	1626	541		Listeria monocytogenes FSL J2-071		COG1276 COG2372	P R	pfam04234 pfam05425		Yes	Yes
641765298	9		LmonocytoFSL_010100014378	TRUE	FALSE	FALSE	FALSE		copper resistance domain protein	1626	541		Listeria monocytogenes FSL J2-064		COG1276 COG2372	P R	pfam04234 pfam05425		Yes	Yes
641785697	16		MtubH_010100021300	FALSE	TRUE	FALSE	FALSE		conserved integral membrane protein	1986	661		Mycobacterium tuberculosis Haarlem		COG3336	S	pfam05425 pfam09678		No	Yes
641789247	8		YpesF_010100006029	FALSE	FALSE	FALSE	FALSE		copper resistance protein D	885	294		Yersinia pestis FV-1		COG1276	P	pfam05425		No	Yes
641825539	8		YpUG050454_3470	FALSE	FALSE	FALSE	FALSE	copD	copper resistance protein D	885	294		Yersinia pestis bv Antiqua UG05-0454		COG1276	P	pfam05425		No	Yes
641828706	8		YpMG051020_3666	FALSE	FALSE	FALSE	FALSE	copD	copper resistance protein D	885	294		Yersinia pestis bv Orientalis MG05-1020		COG1276	P	pfam05425		No	Yes
641834280	8		YpK1973002_4271	FALSE	FALSE	FALSE	FALSE	copD	copper resistance protein D	885	294		Yersinia pestis bv Mediaevalis K1973002		COG1276	P	pfam05425		No	Yes
641835721	8		YpB42003004_1160	FALSE	FALSE	FALSE	FALSE	copD	copper resistance protein D	885	294		Yersinia pestis bv Antiqua B42003004		COG1276	P	pfam05425		No	Yes
641842838	8		YpE1979001_4310	FALSE	FALSE	FALSE	FALSE	copD	copper resistance protein D	885	294		Yersinia pestis bv Antiqua E1979001		COG1276	P	pfam05425		No	Yes
641845644	4		BmalP_010100000835	FALSE	FALSE	FALSE	FALSE		hypothetical protein	459	152		Burkholderia mallei PRL-20		COG5615	S	pfam05425		No	Yes
641851353	8		BmalP_010100029699	FALSE	FALSE	FALSE	FALSE		copper resistance family protein	927	308		Burkholderia mallei PRL-20		COG1276	P	pfam05425		No	Yes
641858451	8		Sente_010100012606	FALSE	FALSE	FALSE	FALSE		putative cation transporter	876	291		Salmonella enterica enterica sv Kentucky CVM29188		COG1276	P	pfam05425		No	Yes
641876044	8		Sentente_010100018593	FALSE	FALSE	FALSE	FALSE		hypothetical protein	876	291		Salmonella enterica enterica sv Saint Paul SARA29		COG1276	P	pfam05425		No	Yes
641882150	8		Sententer_010100020537	FALSE	FALSE	FALSE	FALSE		putative inner membrane protein	876	291		Salmonella enterica enetrica sv. S4,[5],12:i: CVM23701		COG1276	P	pfam05425		No	Yes
641893043	8		YpF1991016_4274	FALSE	FALSE	FALSE	FALSE	copD	copper resistance protein D	885	294		Yersinia pestis bv Orientalis F1991016		COG1276	P	pfam05425		No	Yes
641899742	8		BthaT_010100011303	FALSE	FALSE	FALSE	FALSE		copper resistance protein, putative	948	315		Burkholderia thailandensis TXDOH		COG1276	P	pfam05425		No	Yes
641900945	8		BthaT_010100017341	FALSE	FALSE	FALSE	FALSE		copper resistance protein, putative	927	308		Burkholderia thailandensis TXDOH		COG1276	P	pfam05425		No	Yes
641901293	4		BthaT_010100019080	FALSE	FALSE	FALSE	FALSE		hypothetical protein	459	152		Burkholderia thailandensis TXDOH		COG5615	S	pfam05425		No	Yes
641905352	8		BuboB_010100005476	FALSE	FALSE	FALSE	FALSE		copper resistance D domain protein	942	313		Burkholderia ubonensis Bu		COG1276	P	pfam05425		No	Yes
641906448	4		BuboB_010100010975	FALSE	FALSE	FALSE	FALSE		integral membrane protein-like	459	152		Burkholderia ubonensis Bu		COG5615	S	pfam05425		No	Yes
641912263	8		BoklE_010100003731	FALSE	FALSE	FALSE	FALSE		copper resistance protein, putative	927	308		Burkholderia oklahomensis EO147		COG1276	P	pfam05425		No	Yes
641912644	4		BoklE_010100005640	FALSE	FALSE	FALSE	FALSE		hypothetical protein	459	152		Burkholderia oklahomensis EO147		COG5615	S	pfam05425		No	Yes
641915800	7		BoklE_010100021529	FALSE	FALSE	FALSE	FALSE		copper resistance protein, putative	948	315		Burkholderia oklahomensis EO147		COG1276	P	pfam05425		No	Yes
641919511	8		BoklC_010100003496	FALSE	FALSE	FALSE	FALSE		copper resistance protein, putative	927	308		Burkholderia oklahomensis C6786		COG1276	P	pfam05425		No	Yes
641919914	4		BoklC_010100005530	FALSE	FALSE	FALSE	FALSE		hypothetical protein	459	152		Burkholderia oklahomensis C6786		COG5615	S	pfam05425		No	Yes
641925590	7		BoklC_010100034085	FALSE	FALSE	FALSE	FALSE		copper resistance protein, putative	948	315		Burkholderia oklahomensis C6786		COG1276	P	pfam05425		No	Yes
641928074	8		BthaB_010100011173	FALSE	FALSE	FALSE	FALSE		copper resistance protein, putative	948	315		Burkholderia thailandensis Bt4		COG1276	P	pfam05425		No	Yes
641929615	4		BthaB_010100018916	FALSE	FALSE	FALSE	FALSE		hypothetical protein	459	152		Burkholderia thailandensis Bt4		COG5615	S	pfam05425		No	Yes
641933982	4		BpseD_010100006574	FALSE	FALSE	FALSE	FALSE		hypothetical protein	459	152		Burkholderia pseudomallei DM98		COG5615	S	pfam05425		No	Yes
641937902	7		BpseD_010100026254	FALSE	FALSE	FALSE	FALSE		putative copper resistance protein D	945	314		Burkholderia pseudomallei DM98		COG1276	P	pfam05425		No	Yes
641942153	4		Bpse14_010100004221	FALSE	FALSE	FALSE	FALSE		copper resistance family protein	525	174		Burkholderia pseudomallei 14				pfam05425		No	Yes
641942591	4		Bpse14_010100006435	FALSE	FALSE	FALSE	FALSE		hypothetical protein	459	152		Burkholderia pseudomallei 14		COG5615	S	pfam05425		No	Yes
641946476	7		Bpse14_010100025888	FALSE	FALSE	FALSE	FALSE		putative copper-resistance membrane protein	945	314		Burkholderia pseudomallei 14		COG1276	P	pfam05425		No	Yes
641950519	4		Bpse9_010100004478	FALSE	FALSE	FALSE	FALSE		copper resistance family protein	479	158		Burkholderia pseudomallei 91				pfam05425		No	Yes
641954906	7		Bpse9_010100026523	FALSE	FALSE	FALSE	FALSE		putative copper resistance protein D	945	314		Burkholderia pseudomallei 91		COG1276	P	pfam05425		No	Yes
641958003	4		Bpse9_010100042203	FALSE	FALSE	FALSE	FALSE		hypothetical protein	459	152		Burkholderia pseudomallei 91		COG5615	S	pfam05425		No	Yes
641958847	4		Bpseu9_010100004206	FALSE	FALSE	FALSE	FALSE		copper resistance family protein	511	169		Burkholderia pseudomallei 9				pfam05425		No	Yes
641959284	4		Bpseu9_010100006395	FALSE	FALSE	FALSE	FALSE		hypothetical protein	459	152		Burkholderia pseudomallei 9		COG5615	S	pfam05425		No	Yes
641963122	7		Bpseu9_010100025670	FALSE	FALSE	FALSE	FALSE		putative copper resistance protein D	945	314		Burkholderia pseudomallei 9		COG1276	P	pfam05425		No	Yes
641966998	8		Bpse38_010100003521	FALSE	FALSE	FALSE	FALSE		copper resistance protein, putative	927	308		Burkholderia thailandensis MSMB43		COG1276	P	pfam05425		No	Yes
641967375	3		Bpse38_010100005422	FALSE	FALSE	FALSE	FALSE		hypothetical protein	393	130		Burkholderia thailandensis MSMB43		COG5615	S	pfam05425		No	Yes
641974568	5		BpseB_010100003984	FALSE	FALSE	FALSE	FALSE		copper resistance family protein	591	196		Burkholderia pseudomallei B7210				pfam05425		No	Yes
641974985	4		BpseB_010100006073	FALSE	FALSE	FALSE	FALSE		hypothetical protein	459	152		Burkholderia pseudomallei B7210		COG5615	S	pfam05425		No	Yes
641978773	7		BpseB_010100025211	FALSE	FALSE	FALSE	FALSE		putative copper-resistance membrane protein	781	259		Burkholderia pseudomallei B7210		COG1276	P	pfam05425		No	Yes
641982789	5		Bpse7_010100004181	FALSE	FALSE	FALSE	FALSE		copper resistance family protein	566	187		Burkholderia pseudomallei 7894				pfam05425		Yes	Yes
641983225	4		Bpse7_010100006412	FALSE	FALSE	FALSE	FALSE		hypothetical protein	459	152		Burkholderia pseudomallei 7894		COG5615	S	pfam05425		No	Yes
641987054	7		Bpse7_010100025732	FALSE	FALSE	FALSE	FALSE		putative copper resistance protein D	945	314		Burkholderia pseudomallei 7894		COG1276	P	pfam05425		No	Yes
641991139	5		Bpse112_010100004134	FALSE	FALSE	FALSE	FALSE		copper resistance family protein	575	190		Burkholderia pseudomallei 112				pfam05425		No	Yes
641991554	4		Bpse112_010100006231	FALSE	FALSE	FALSE	FALSE		hypothetical protein	459	152		Burkholderia pseudomallei 112		COG5615	S	pfam05425		No	Yes
641995374	7		Bpse112_010100025407	FALSE	FALSE	FALSE	FALSE		putative copper-resistance membrane protein	945	314		Burkholderia pseudomallei 112		COG1276	P	pfam05425		No	Yes
641999667	4		BpseN_010100006170	FALSE	FALSE	FALSE	FALSE		hypothetical protein	459	152		Burkholderia pseudomallei NCTC 13177		COG5615	S	pfam05425		No	Yes
642001814	8		BpseN_010100017084	FALSE	FALSE	FALSE	FALSE		copper resistance family protein	927	308		Burkholderia pseudomallei NCTC 13177		COG1276	P	pfam05425		No	Yes
642003395	7		BpseN_010100025081	FALSE	FALSE	FALSE	FALSE		putative copper resistance protein D	945	314		Burkholderia pseudomallei NCTC 13177		COG1276	P	pfam05425		No	Yes
642007375	8		BpseBC_010100003891	FALSE	FALSE	FALSE	FALSE		copper resistance family protein	927	308		Burkholderia pseudomallei BCC215		COG1276	P	pfam05425		No	Yes
642007805	4		BpseBC_010100006063	FALSE	FALSE	FALSE	FALSE		predicted integral membrane protein	459	152		Burkholderia pseudomallei BCC215		COG5615	S	pfam05425		No	Yes
642011505	7		BpseBC_010100024623	FALSE	FALSE	FALSE	FALSE		putative copper resistance protein D	945	314		Burkholderia pseudomallei BCC215		COG1276	P	pfam05425		No	Yes
642121543	8		Sententerica_010100022103	FALSE	FALSE	FALSE	FALSE		putative cation transporter	876	291		Salmonella enterica enterica sv Kentucky CDC 191		COG1276	P	pfam05425		No	Yes
642126399	8		Senteenterica_010100020109	FALSE	FALSE	FALSE	FALSE		putative inner membrane protein	876	291		Salmonella enterica enterica sv Schwarzengrund SL480		COG1276	P	pfam05425		No	Yes
642134797	8		Senterienterica_010100007706	FALSE	FALSE	FALSE	FALSE		hypothetical protein	876	291		Salmonella enterica enterica Heidelberg SL486		COG1276	P	pfam05425		No	Yes
642155669	8		Saentericaenterica_010100000770	FALSE	FALSE	FALSE	FALSE		putative inner membrane protein	876	291		Salmonella enterica enterica sv Newport SL317		COG1276	P	pfam05425		No	Yes
642167082	8		Salentericaenterica_010100015001	FALSE	FALSE	FALSE	FALSE		putative inner membrane protein	876	291		Salmonella enterica enterica sv Weltevreden HI_N05-537		COG1276	P	pfam05425		No	Yes
642170221	8		Salmentericaenterica_010100002065	FALSE	FALSE	FALSE	FALSE		putative inner membrane protein	876	291		Salmonella enterica enterica sv Hadar RI_05P066		COG1276	P	pfam05425		No	Yes
642276070	8		EschcoliO157_010100028751	FALSE	FALSE	FALSE	FALSE		putative resistance protein	873	290		Escherichia coli O157:H7 EC4196		COG1276	P	pfam05425		No	Yes
642282050	8		EsccoliO157_010100027448	FALSE	FALSE	FALSE	FALSE		putative resistance protein	873	290		Escherichia coli O157:H7 EC4113		COG1276	P	pfam05425		No	Yes
642287917	8		EscoliO157_010100024673	FALSE	FALSE	FALSE	FALSE		putative resistance protein	873	290		Escherichia coli O157:H7 EC4076		COG1276	P	pfam05425		No	Yes
642295017	8		EcoliO157_010100028463	FALSE	FALSE	FALSE	FALSE		putative resistance protein	873	290		Escherichia coli O157:H7 EC4401		COG1276	P	pfam05425		No	Yes
642301078	8		EcolO157_010100026453	FALSE	FALSE	FALSE	FALSE		putative resistance protein	873	290		Escherichia coli O157:H7 EC4486		COG1276	P	pfam05425		No	Yes
642305514	8		EcolO15_010100015438	FALSE	FALSE	FALSE	FALSE		putative resistance protein	873	290		Escherichia coli O157:H7 EC4501		COG1276	P	pfam05425		No	Yes
642312671	8		EcolO1_010100018974	FALSE	FALSE	FALSE	FALSE		putative resistance protein	873	290		Escherichia coli O157:H7 EC869		COG1276	P	pfam05425		No	Yes
642320639	8		EcolO_010100027134	FALSE	FALSE	FALSE	FALSE		putative resistance protein	873	290		Escherichia coli O157:H7 EC508		COG1276	P	pfam05425		No	Yes
642340572	9		BAC_1931	TRUE	FALSE	FALSE	TRUE		putative membrane protein	1650	549		Bacillus anthracis A0488		COG1276	P	pfam04234 pfam05425 pfam13115		Yes	Yes
642343618	8		PstuA_020100012885	FALSE	FALSE	FALSE	FALSE		hypothetical protein	897	298		Providencia stuartii ATCC 25827		COG1276	P	pfam05425		No	Yes
642366628	9		BAQ_1960	TRUE	FALSE	FALSE	TRUE		putative membrane protein	1650	549		Bacillus anthracis A0193		COG1276	P	pfam04234 pfam05425 pfam13115		Yes	Yes
642372003	9		BAH_1958	TRUE	FALSE	FALSE	TRUE		putative membrane protein	1650	549		Bacillus anthracis A0442		COG1276	P	pfam04234 pfam05425 pfam13115		Yes	Yes
642404987	8		ESCAB7627_4450	FALSE	FALSE	FALSE	FALSE		copper resistance protein D	930	309		Escherichia albertii TW07627		COG1276	P	pfam05425		No	Yes
642407607	8		ESCAB7627_3408	FALSE	FALSE	FALSE	FALSE		copper resistance protein D	873	290		Escherichia albertii TW07627		COG1276	P	pfam05425		No	Yes
642410243	9		BAK_1990	TRUE	FALSE	FALSE	TRUE		putative membrane protein	1650	549		Bacillus anthracis A0389		COG1276	P	pfam04234 pfam05425 pfam13115		Yes	Yes
642414101	8		BamIOP4010DRAFT_0226	FALSE	FALSE	FALSE	FALSE		copper resistance D domain protein	942	313		Burkholderia ambifaria IOP40-10		COG1276	P	pfam05425		No	Yes
642416008	8		BamIOP4010DRAFT_2115	FALSE	FALSE	FALSE	FALSE		copper resistance D domain protein	933	310		Burkholderia ambifaria IOP40-10		COG1276	P	pfam05425		No	Yes
642417608	4		BamIOP4010DRAFT_3703	FALSE	FALSE	FALSE	FALSE		integral membrane protein-like protein	459	152		Burkholderia ambifaria IOP40-10		COG5615	S	pfam05425		No	Yes
642421007	8		BgramDRAFT_0154	FALSE	FALSE	FALSE	FALSE		copper resistance D domain protein	945	314		Burkholderia graminis C4D1M		COG1276	P	pfam05425		No	Yes
642422691	4		BgramDRAFT_1835	FALSE	FALSE	FALSE	FALSE		conserved hypothetical protein	459	152		Burkholderia graminis C4D1M		COG5615	S	pfam05425		No	Yes
642424249	8		BgramDRAFT_3384	FALSE	FALSE	FALSE	FALSE		copper resistance D domain protein	930	309		Burkholderia graminis C4D1M		COG1276	P	pfam05425		No	Yes
642429340	9		BAM_1951	TRUE	FALSE	FALSE	TRUE		putative membrane protein	1650	549		Bacillus anthracis A0465		COG1276	P	pfam04234 pfam05425 pfam13115		Yes	Yes
642440119	8		BamMEX5DRAFT_2014	FALSE	FALSE	FALSE	FALSE		copper resistance D domain protein	933	310		Burkholderia ambifaria MEX-5		COG1276	P	pfam05425		No	Yes
642440292	4		BamMEX5DRAFT_2187	FALSE	FALSE	FALSE	FALSE		integral membrane protein-like protein	459	152		Burkholderia ambifaria MEX-5		COG5615	S	pfam05425		No	Yes
642442388	8		BamMEX5DRAFT_4283	FALSE	FALSE	FALSE	FALSE		copper resistance D domain protein	942	313		Burkholderia ambifaria MEX-5		COG1276	P	pfam05425		No	Yes
642459960	9		BAO_1903	TRUE	FALSE	FALSE	TRUE		putative membrane protein	1650	549		Bacillus anthracis A0174		COG1276	P	pfam04234 pfam05425 pfam13115		Yes	Yes
642575503	15		CMS_3068	FALSE	TRUE	FALSE	FALSE		putative integral membrane transport protein	1857	618		Clavibacter michiganensis sepedonicus ATCC 33113		COG1276 COG3336	P S	pfam05425 pfam09678		Yes	Yes
642577385	8		PMI1009	FALSE	FALSE	FALSE	FALSE		copper resistance protein	900	299		Proteus mirabilis HI4320		COG1276	P	pfam05425		No	Yes
642589727	16		KRH_03690	FALSE	TRUE	FALSE	FALSE		hypothetical protein	2163	720		Kocuria rhizophila DC2201		COG1276 COG3336	P S	pfam05425 pfam09678		No	Yes
642592195	8		Bphy_0431	FALSE	FALSE	FALSE	FALSE		copper resistance D domain-containing protein	930	309		Burkholderia phymatum STM815		COG1276	P	pfam05425		No	Yes
642593830	8		Bphy_2037	FALSE	FALSE	FALSE	FALSE		copper resistance D domain-containing protein	942	313		Burkholderia phymatum STM815		COG1276	P	pfam05425		No	Yes
642593914	4		Bphy_2122	FALSE	FALSE	FALSE	FALSE		hypothetical protein	459	152		Burkholderia phymatum STM815		COG5615	S	pfam05425		No	Yes
642607939	8		YPTS_1786	FALSE	FALSE	FALSE	FALSE		copper resistance D domain-containing protein	885	294		Yersinia pseudotuberculosis PB1/+		COG1276	P	pfam05425		No	Yes
642619085	7		Rpic_4608	FALSE	FALSE	FALSE	FALSE		copper resistance D domain protein	945	314		Ralstonia pickettii 12J		COG1276	P	pfam05425		No	Yes
642620766	4		Bphyt_1207	FALSE	FALSE	FALSE	FALSE		hypothetical protein	459	152		Burkholderia phytofirmans PsJN		COG5615	S	pfam05425		No	Yes
642622880	8		Bphyt_3306	FALSE	FALSE	FALSE	FALSE		copper resistance D domain protein	936	311		Burkholderia phytofirmans PsJN		COG1276	P	pfam05425		No	Yes
642625286	8		Rpic_1722	FALSE	FALSE	FALSE	FALSE		copper resistance D domain protein	930	309		Ralstonia pickettii 12J		COG1276	P	pfam05425		No	Yes
642625340	8		Rpic_1776	FALSE	FALSE	FALSE	FALSE		copper resistance D domain protein	930	309		Ralstonia pickettii 12J		COG1276	P	pfam05425		No	Yes
642625399	8		Rpic_1837	FALSE	FALSE	FALSE	FALSE		copper resistance D domain protein	930	309		Ralstonia pickettii 12J		COG1276	P	pfam05425		No	Yes
642657564	4		SYO3AOP1_1279	FALSE	FALSE	FALSE	FALSE		protein of unknown function DUF474	450	149		Sulfurihydrogenibium sp. YO3AOP1				pfam05425		No	Yes
642667588	8		BMULJ_06274	FALSE	FALSE	FALSE	FALSE	pcoD	Cu resistance protein CopD	942	313		Burkholderia multivorans ATCC 17616		COG1276	P	pfam05425		No	Yes
642669315	3		Clim_1710	FALSE	FALSE	FALSE	FALSE		hypothetical protein	411	136		Chlorobium limicola DSM 245				pfam05425		No	Yes
642670997	8		BMULJ_00900	FALSE	FALSE	FALSE	FALSE	pcoD	putative copper resistance protein D	954	317		Burkholderia multivorans ATCC 17616		COG1276	P	pfam05425		No	Yes
642672417	4		BMULJ_02343	FALSE	FALSE	FALSE	FALSE		predicted integral membrane protein	459	152		Burkholderia multivorans ATCC 17616		COG5615	S	pfam05425		No	Yes
642672702	8		BMULJ_02630	FALSE	FALSE	FALSE	FALSE	pcoD	putative copper resistance protein D	933	310		Burkholderia multivorans ATCC 17616		COG1276	P	pfam05425		No	Yes
642675595	5		Glov_0201	FALSE	FALSE	FALSE	FALSE		cytochrome b5	927	308		Geobacter lovleyi SZ		COG4892	R	pfam00173 pfam05425		Yes	No
642693525	8		Smlt2441	FALSE	FALSE	FALSE	FALSE	copD	putative transmembrane transporter protein	942	313		Stenotrophomonas maltophilia K279a		COG1276	P	pfam05425		No	Yes
642693762	8		Smlt2692	FALSE	FALSE	FALSE	FALSE	copD	putative copper resistance transporter protein	885	294		Stenotrophomonas maltophilia K279a		COG1276	P	pfam05425		No	Yes
642713153	9		Rpal_3277	TRUE	FALSE	FALSE	FALSE		copper resistance protein CopC	1587	528		Rhodopseudomonas palustris TIE-1		COG1276 COG2372	P R	pfam04234 pfam05425		No	Yes
642720238	4		Cpar_1591	FALSE	FALSE	FALSE	FALSE		hypothetical protein	450	149		Chlorobaculum parvum NCIB 8327				pfam05425		No	Yes
642727283	4		Ppha_1032	FALSE	FALSE	FALSE	FALSE		hypothetical protein	438	145		Pelodictyon phaeoclathratiforme BU-1				pfam05425		No	Yes
642731346	8		Smal_2164	FALSE	FALSE	FALSE	FALSE		copper resistance D domain protein	885	294		Stenotrophomonas maltophilia R551-3		COG1276	P	pfam05425		No	Yes
642737389	8		SNSL254_A2033	FALSE	FALSE	FALSE	FALSE		copper resistance protein D	876	291		Salmonella enterica sv Newport SL254		COG1276	P	pfam05425		No	Yes
642742284	8		SeHA_C2088	FALSE	FALSE	FALSE	FALSE		copper resistance protein D	876	291		Salmonella enterica sv Heidelberg SL476, CVM30485		COG1276	P	pfam05425		No	Yes
642747108	8		SeSA_A2028	FALSE	FALSE	FALSE	FALSE		copper resistance protein D	876	291		Salmonella enterica enterica sv Schwarzengrund CVM19633		COG1276	P	pfam05425		No	Yes
642750240	4		HY04AAS1_0447	FALSE	FALSE	FALSE	FALSE		protein of unknown function DUF474	450	149		Hydrogenobaculum sp. Y04AAS1				pfam05425		No	Yes
642753753	8		MADE_00324	FALSE	FALSE	FALSE	FALSE		putative copper export protein	915	304		Alteromonas macleodii Deep ecotype, DSM 17117		COG1276	P	pfam05425		No	Yes
642753818	7		MADE_00389	FALSE	FALSE	FALSE	FALSE		putative copper export protein	888	295		Alteromonas macleodii Deep ecotype, DSM 17117		COG1276	P	pfam05425		No	Yes
642757777	7		PHZ_p0224	FALSE	FALSE	FALSE	FALSE	copD	copper resistance d transmembrane protein	933	310		Phenylobacterium zucineum HLK1		COG1276	P	pfam05425		No	Yes
642759378	8		PHZ_c1480	FALSE	FALSE	FALSE	FALSE		putative copper export protein	930	309		Phenylobacterium zucineum HLK1		COG1276	P	pfam05425		No	Yes
642766238	4		Gbem_0269	FALSE	FALSE	FALSE	FALSE		cytochrome b5	954	317		Geobacter bemidjiensis Bem, DSM 16622		COG4892	R	pfam00173 pfam05425		Yes	Yes
642770993	8		SSPA0928	FALSE	FALSE	FALSE	FALSE		putative cation transporter	876	291		Salmonella enterica sv Paratyphi A AKU_12601		COG1276	P	pfam05425		No	Yes
642775511	8		SeAg_B1250	FALSE	FALSE	FALSE	FALSE		copper resistance protein D	876	291		Salmonella enterica Agona SL483		COG1276	P	pfam05425		No	Yes
642784543	8		SeD_A1375	FALSE	FALSE	FALSE	FALSE		copper resistance protein D	876	291		Salmonella enterica sv Dublin CT_02021853		COG1276	P	pfam05425		No	Yes
642788945	4		Lferr_1065	FALSE	FALSE	FALSE	FALSE		hypothetical protein	465	154		Acidithiobacillus ferrooxidans ATCC 53993		COG5615	S	pfam05425		No	Yes
642800299	4		StMg1_010100018341	FALSE	FALSE	FALSE	FALSE		putative integral membrane protein	900	300		Streptomyces sp. Mg1				pfam05425		No	Yes
642818092	8		EscherichcoliO157_010100025620	FALSE	FALSE	FALSE	FALSE		putative resistance protein	873	290		Escherichia coli O157:H7 EC4024		COG1276	P	pfam05425		No	Yes
642878649	9		BAT_3717	TRUE	FALSE	FALSE	TRUE		YcnJ	1635	544		Bacillus pumilus ATCC 7061		COG1276	P	pfam04234 pfam05425 pfam13115		Yes	Yes
642910964	13		CfE428DRAFT_3675	FALSE	FALSE	FALSE	FALSE		copper resistance D domain protein	1608	535		Chthoniobacter flavus Ellin428		COG1276	P	pfam05425		No	Yes
642923745	4		Rpal_1063	FALSE	FALSE	FALSE	FALSE			444	147		Rhodopseudomonas palustris TIE-1				pfam05425		No	Yes
642924337	5		Lferr_2277	FALSE	FALSE	FALSE	FALSE			534	178		Acidithiobacillus ferrooxidans ATCC 53993				pfam05425		No	Yes
642980127	8		Bcoam_010100004590	FALSE	FALSE	FALSE	FALSE		hypothetical protein	942	313		Bacillus coahuilensis m4-4		COG1276	P	pfam05425		No	Yes
643016235	8		ESCCO14588_4071	FALSE	FALSE	FALSE	FALSE		copper resistance protein D	873	290		Escherichia coli O157:H7 TW14588		COG1276	P	pfam05425		No	Yes
643021547	16		Mtub9_010100021508	FALSE	TRUE	FALSE	FALSE		integral membrane protein	1986	661		Mycobacterium tuberculosis 94_M4241A		COG3336	S	pfam05425 pfam09678		No	Yes
643025745	16		Mtub0_010100020861	FALSE	TRUE	FALSE	FALSE		integral membrane protein	1986	661		Mycobacterium tuberculosis 02_1987		COG3336	S	pfam05425 pfam09678		No	Yes
643026469	16		MtubT9_010100002511	FALSE	TRUE	FALSE	FALSE		integral membrane protein	1986	661		Mycobacterium tuberculosis T92		COG3336	S	pfam05425 pfam09678		No	Yes
643034271	16		MtubE_010100020739	FALSE	TRUE	FALSE	FALSE		integral membrane protein	1986	661		Mycobacterium tuberculosis EAS054		COG3336	S	pfam05425 pfam09678		No	Yes
643038508	16		MtubT_010100021443	FALSE	TRUE	FALSE	FALSE		integral membrane protein	1986	661		Mycobacterium tuberculosis T85		COG3336	S	pfam05425 pfam09678		No	Yes
643047542	16		MtubG1_010100021409	FALSE	TRUE	FALSE	FALSE		integral membrane protein	1986	661		Mycobacterium tuberculosis GM 1503		COG3336	S	pfam05425 pfam09678		No	Yes
643047880	16		MtubT1_010100000735	FALSE	TRUE	FALSE	FALSE		integral membrane protein	1986	661		Mycobacterium tuberculosis T17		COG3336	S	pfam05425 pfam09678		No	Yes
643090984	4		PSPTOT1_2030	FALSE	FALSE	FALSE	FALSE		conserved hypothetical protein	465	154		Pseudomonas syringae pv. tomato T1		COG5615	S	pfam05425		No	Yes
643091404	7		PSPTOT1_3174	FALSE	FALSE	FALSE	FALSE		Copper resistance D	885	294		Pseudomonas syringae pv. tomato T1		COG1276	P	pfam05425		No	Yes
643143004	8		PROVRUST_02615	FALSE	FALSE	FALSE	FALSE		Putative copper export protein	897	298		Providencia rustigianii DSM 4541		COG1276	P	pfam05425		No	Yes
643146166	8		PROVALCAL_01845	FALSE	FALSE	FALSE	FALSE		Putative copper export protein	897	298		Providencia alcalifaciens DSM 30120		COG1276	P	pfam05425		No	Yes
643174622	4		BH160DRAFT_1267	FALSE	FALSE	FALSE	FALSE		conserved hypothetical protein	459	152		Burkholderia sp. H160		COG5615	S	pfam05425		No	Yes
643176780	8		BH160DRAFT_3407	FALSE	FALSE	FALSE	FALSE		copper resistance D domain protein	930	309		Burkholderia sp. H160		COG1276	P	pfam05425		No	Yes
643193510	16		CORAM0001_1160	FALSE	TRUE	FALSE	FALSE		ABC-type transporter, permease domain	2148	715		Corynebacterium amycolatum SK46		COG3336	S	pfam05425 pfam09678		No	Yes
643194910	4		CAPSP0001_0156	FALSE	FALSE	FALSE	FALSE		conserved hypothetical protein	459	152		Capnocytophaga sputigena Capno, ATCC 33612				pfam05425		No	Yes
643200390	4		BUC_1356	FALSE	FALSE	FALSE	FALSE		conserved hypothetical protein	459	152		Burkholderia pseudomallei 576		COG5615	S	pfam05425		No	Yes
643200781	8		BUC_0962	FALSE	FALSE	FALSE	FALSE		copper resistance family protein	927	308		Burkholderia pseudomallei 576		COG1276	P	pfam05425		No	Yes
643205382	8		BUC_4798	FALSE	FALSE	FALSE	FALSE		putative copper resistance protein D	948	315		Burkholderia pseudomallei 576		COG1276	P	pfam05425		No	Yes
643216586	3		Salmonelentericaenterica_010100016966	FALSE	FALSE	FALSE	FALSE		putative cation transporter	345	114		Salmonella enterica enterica sv Typhi 404ty				pfam05425		No	Yes
643227305	8		Salmoneentericaenterica_010100027145	FALSE	FALSE	FALSE	FALSE		putative cation transporter	876	291		Salmonella enterica enterica sv Typhi E00-7866		COG1276	P	pfam05425		No	Yes
643230606	4		Salmonentericaenterica_010100016926	FALSE	FALSE	FALSE	FALSE		putative cation transporter	462	153		Salmonella enterica enterica sv Typhi E01-6750				pfam05425		No	Yes
643237773	8		SentesTyphi_010100015100	FALSE	FALSE	FALSE	FALSE		putative cation transporter	876	291		Salmonella enterica enterica sv Typhi E02-1180		COG1276	P	pfam05425		No	Yes
643247009	5		SentesTyph_010100038798	FALSE	FALSE	FALSE	FALSE		putative cation transporter	547	181		Salmonella enterica enterica sv Typhi E98-0664				pfam05425		No	Yes
643254121	4		SentesTyp_010100038298	FALSE	FALSE	FALSE	FALSE		putative cation transporter	472	156		Salmonella enterica enterica sv Typhi E98-2068				pfam05425		No	Yes
643256540	8		SentesTy_010100013239	FALSE	FALSE	FALSE	FALSE		putative cation transporter	876	291		Salmonella enterica enterica sv Typhi J185		COG1276	P	pfam05425		No	Yes
643268696	3		Salmonellaentericaenterica_010100014499	FALSE	FALSE	FALSE	FALSE		putative cation transporter	357	118		Salmonella enterica enterica sv Typhi AG3				pfam05425		No	Yes
643279202	8		Salmonellentericaenterica_010100020854	FALSE	FALSE	FALSE	FALSE		putative cation transporter	876	291		Salmonella enterica enterica sv Typhi E98-3139		COG1276	P	pfam05425		No	Yes
643349843	9		BCAL0936	FALSE	FALSE	FALSE	FALSE		putative transmembrane transporter protein	978	325		Burkholderia cenocepacia J2315		COG1276	P	pfam05425		No	Yes
643351368	4		BCAL2453	FALSE	FALSE	FALSE	FALSE		hypothetical protein	459	152		Burkholderia cenocepacia J2315		COG5615	S	pfam05425		No	Yes
643352895	8		BCAM0450	FALSE	FALSE	FALSE	FALSE		putative copper-resistance membrane protein	942	313		Burkholderia cenocepacia J2315		COG1276	P	pfam05425		No	Yes
643359580	8		SG1178	FALSE	FALSE	FALSE	FALSE		putative cation transporter	876	291		Salmonella enterica enterica sv Gallinarum 287/91		COG1276	P	pfam05425		No	Yes
643364795	8		KPK_1932	FALSE	FALSE	FALSE	FALSE		copper resistance protein D	870	289		Klebsiella pneumoniae 342		COG1276	P	pfam05425		No	Yes
643369523	8		SEN1129	FALSE	FALSE	FALSE	FALSE		putative cation transporter	876	291		Salmonella enterica enterica sv Enteritidis P125109		COG1276	P	pfam05425		No	Yes
643386440	8		ECH74115_2575	FALSE	FALSE	FALSE	FALSE		copper resistance protein D	873	290		Escherichia coli O157:H7 EC4115		COG1276	P	pfam05425		No	Yes
643392832	4		Gdia_3321	FALSE	FALSE	FALSE	FALSE		putative integral membrane protein	453	150		Gluconacetobacter diazotrophicus PAl 5, DSM 5601		COG5615	S	pfam05425		No	No
643407987	8		ECSE_2015	FALSE	FALSE	FALSE	FALSE		putative transport protein	873	290		Escherichia coli SE11		COG1276	P	pfam05425		No	Yes
643432090	8		AB57_0657	FALSE	FALSE	FALSE	FALSE		copper resistance D	882	293		Acinetobacter baumannii AB0057		COG1276	P	pfam05425		No	Yes
643443307	8		E2348C_1965	FALSE	FALSE	FALSE	FALSE	yebZ	predicted inner membrane protein	873	290		Escherichia coli O127:H6 E2348/69 (EPEC)		COG1276	P	pfam05425		No	No
643450478	9		BCAH187_A2018	TRUE	FALSE	FALSE	TRUE		hypothetical protein	1650	549		Bacillus cereus AH187 (F4810/72)		COG1276	P	pfam04234 pfam05425 pfam13115		Yes	Yes
643454584	9		LMHCC_0498	TRUE	FALSE	FALSE	FALSE		copper resistance domain protein	1626	541		Listeria monocytogenes HCC23		COG1276 COG2372	P R	pfam04234 pfam05425		Yes	No
643463797	8		Msil_0467	FALSE	FALSE	FALSE	FALSE		copper resistance D domain protein	942	313	aMOB	Methylocella silvestris BL2, DSM 15510		COG1276	P	pfam05425		No	Yes
643469452	9		BCB4264_A1917	TRUE	FALSE	FALSE	TRUE		hypothetical protein	1650	549		Bacillus cereus B4264		COG1276	P	pfam04234 pfam05425 pfam13115		Yes	Yes
643490493	8		ECIAI1_1912	FALSE	FALSE	FALSE	FALSE	yebZ	conserved hypothetical protein; putative inner membrane protein	873	290		Escherichia coli IAI1		COG1276	P	pfam05425		No	No
643501521	8		ECED1_2045	FALSE	FALSE	FALSE	FALSE	yebZ	conserved hypothetical protein; putative inner membrane protein	873	290		Escherichia coli O81 ED1a		COG1276	P	pfam05425		No	No
643506678	8		EC55989_2018	FALSE	FALSE	FALSE	FALSE	yebZ	conserved hypothetical protein; putative inner membrane protein	873	290		Escherichia coli 55989		COG1276	P	pfam05425		No	Yes
643508533	8		EC55989_3903	FALSE	FALSE	FALSE	FALSE		Copper resistance protein D	930	309		Escherichia coli 55989		COG1276	P	pfam05425		No	Yes
643511037	8		ECIAI39_1210	FALSE	FALSE	FALSE	FALSE	yebZ	conserved hypothetical protein; putative inner membrane protein	873	290		Escherichia coli IAI39		COG1276	P	pfam05425		No	Yes
643529347	4		AFE_0949	FALSE	FALSE	FALSE	FALSE		hypothetical protein	465	154		Acidithiobacillus ferrooxidans ATCC 23270		COG5615	S	pfam05425		No	No
643531007	8		AFE_2651	FALSE	FALSE	FALSE	FALSE		copper resistance protein, putative	1095	364		Acidithiobacillus ferrooxidans ATCC 23270		COG1276	P	pfam05425		No	Yes
643546045	4		PLES_42791	FALSE	FALSE	FALSE	FALSE		hypothetical protein	465	154		Pseudomonas aeruginosa LESB58		COG5615	S	pfam05425		No	Yes
643546780	4		PLES_49951	FALSE	FALSE	FALSE	FALSE		hypothetical protein	435	144		Pseudomonas aeruginosa LESB58				pfam05425		No	Yes
643549625	9		BCG9842_B3426	TRUE	FALSE	FALSE	TRUE		hypothetical protein	1644	547		Bacillus cereus G9842		COG1276	P	pfam04234 pfam05425 pfam13115		Yes	Yes
643555361	8		BCAH820_1949	FALSE	FALSE	FALSE	TRUE		hypothetical protein	1320	439		Bacillus cereus AH820		COG1276	P	pfam05425 pfam13115		No	No
643580646	16		Achl_4532	FALSE	TRUE	FALSE	FALSE		copper resistance D domain protein	1962	653		Arthrobacter chlorophenolicus A6		COG3336	S	pfam05425 pfam09678		No	Yes
643592123	16		Achl_3717	FALSE	TRUE	FALSE	FALSE		copper resistance D domain protein	2157	718		Arthrobacter chlorophenolicus A6		COG1276 COG3336	P S	pfam05425 pfam09678		No	Yes
643604200	8		Mnod_6631	FALSE	FALSE	FALSE	FALSE		copper resistance D domain protein	852	283		Methylobacterium nodulans ORS 2060		COG1276	P	pfam05425		No	Yes
643606531	16		MLBr_01998	FALSE	TRUE	FALSE	FALSE		hypothetical protein	1980	659		Mycobacterium leprae Br4923		COG3336	S	pfam05425 pfam09678		No	Yes
643616094	8		Tgr7_1206	FALSE	FALSE	FALSE	FALSE		copper resistance D domain-containing protein	867	288		Thioalkalivibrio sulfidophilus HL-EbGR7		COG1276	P	pfam05425		No	Yes
643617780	4		Tgr7_2880	FALSE	FALSE	FALSE	FALSE		hypothetical protein	462	153		Thioalkalivibrio sulfidophilus HL-EbGR7		COG5615	S	pfam05425		No	Yes
643623878	4		trd_0479	FALSE	FALSE	FALSE	FALSE		putative integral membrane protein	498	165		Thermomicrobium roseum DSM 5159		COG5615	S	pfam05425		No	Yes
643631580	9		BCQ_1903	TRUE	FALSE	FALSE	TRUE		possible copper resistance protein	1650	549		Bacillus cereus Q1		COG1276	P	pfam04234 pfam05425 pfam13115		Yes	Yes
643652894	7		Avi_4216	FALSE	FALSE	FALSE	FALSE		Cu resistance protein	879	292		Agrobacterium vitis S4		COG1276	P	pfam05425		No	Yes
643655403	4		Dtpsy_2085	FALSE	FALSE	FALSE	FALSE		hypothetical protein	480	159		Acidovorax ebreus TPSY		COG5615	S	pfam05425		No	Yes
643655822	3		Dtpsy_2513	FALSE	FALSE	FALSE	FALSE		hypothetical protein	447	148		Acidovorax ebreus TPSY				pfam05425		No	Yes
643693608	16		pREL1_0118	FALSE	TRUE	FALSE	FALSE		hypothetical protein	1929	642		Rhodococcus erythropolis PR4		COG3336	S	pfam05425 pfam09678		No	Yes
643700493	4		Tmz1t_3552	FALSE	FALSE	FALSE	FALSE		conserved hypothetical membrane spanning protein	462	153		Thauera aminoaromatica MZ1T		COG5615	S	pfam05425		No	Yes
643702315	8		EFER_1233	FALSE	FALSE	FALSE	FALSE	yebZ	putative inner membrane protein yebZ, putative copper ion transport	873	290		Escherichia fergusonii UMN026, ATCC 35469		COG1276	P	pfam05425		No	Yes
643729958	7		SPC_1842	FALSE	FALSE	FALSE	FALSE		putative cation transporter	825	274		Salmonella enterica Paratyphi C RKS4594		COG1276	P	pfam05425		No	Yes
643732925	16		JTY_0106	FALSE	TRUE	FALSE	FALSE		putative integral membrane protein	1986	661		Mycobacterium bovis BCG Tokyo 172		COG3336	S	pfam05425 pfam09678		No	Yes
643741709	4		SULAZ_1027	FALSE	FALSE	FALSE	FALSE		hypothetical protein	450	149		Sulfurihydrogenibium azorense Az-Fu1				pfam05425		No	Yes
643742841	4		PERMA_0320	FALSE	FALSE	FALSE	FALSE		hypothetical protein	459	152		Persephonella marina EX-H1				pfam05425		No	Yes
643762455	9		BCA_1978	TRUE	FALSE	FALSE	TRUE		hypothetical protein	1644	547		Bacillus cereus 03BB102		COG1276	P	pfam04234 pfam05425 pfam13115		Yes	Yes
643771797	9		Lm4b_02083	TRUE	FALSE	FALSE	FALSE		copper export protein	1626	541		Listeria monocytogenes 4b CLIP 80459		COG1276	P	pfam04234 pfam05425		Yes	Yes
643773909	8		GAU_1325	FALSE	FALSE	FALSE	FALSE		copper resistance protein D	972	323		Gemmatimonas aurantiaca T-27T		COG1276	P	pfam05425		No	Yes
643775442	8		GAU_2823	FALSE	FALSE	FALSE	FALSE		putative copper-resistance membrane protein	810	269		Gemmatimonas aurantiaca T-27T		COG1276	P	pfam05425		No	Yes
643776687	9		RER_01290	FALSE	FALSE	FALSE	FALSE		hypothetical protein	915	304		Rhodococcus erythropolis PR4		COG1276	P	pfam05425		No	Yes
643780439	16		RER_38380	FALSE	TRUE	FALSE	FALSE		hypothetical protein	2136	711		Rhodococcus erythropolis PR4		COG3336	S	pfam05425 pfam09678		No	Yes
643799168	8		Deide_3p01300	FALSE	FALSE	FALSE	FALSE		putative copper resistance protein CopD; putative membrane protein	813	270		Deinococcus deserti VCD115		COG1276	P	pfam05425		No	Yes
643804845	4		Avin_19440	FALSE	FALSE	FALSE	FALSE		hypothetical protein	465	154		Azotobacter vinelandii DJ, ATCC BAA-1303		COG5615	S	pfam05425		No	Yes
643818815	9		BAMEG_2678	TRUE	FALSE	FALSE	TRUE		hypothetical protein	1650	549		Bacillus anthracis CDC 684		COG1276	P	pfam04234 pfam05425 pfam13115		Yes	Yes
643822476	9		NGR_b06130	TRUE	FALSE	FALSE	FALSE		possible Copper export protein	1608	535		Ensifer fredii NGR234		COG1276	P	pfam04234 pfam05425		Yes	Yes
643835434	14		cauri_2053	FALSE	TRUE	FALSE	FALSE		hypothetical protein	2073	690		Corynebacterium aurimucosum CN-1, ATCC 700975		COG3336	S	pfam05425 pfam09678		No	Yes
643850749	9		BAA_1982	TRUE	FALSE	FALSE	TRUE		copper resistance protein	1650	549		Bacillus anthracis A0248		COG1276	P	pfam04234 pfam05425 pfam13115		Yes	Yes
643868058	16		Bcav_3955	FALSE	TRUE	FALSE	FALSE		copper resistance D domain protein	2169	722		Beutenbergia cavernae HKI 0122, DSM 12333		COG3336	S	pfam05425 pfam09678		No	Yes
643876052	15		ckrop_1383	FALSE	TRUE	FALSE	FALSE		hypothetical protein	2223	740		Corynebacterium kroppenstedtii DSM 44385		COG3336	S	pfam05425 pfam09678		No	Yes
643881770	4		bglu_1g26910	FALSE	FALSE	FALSE	FALSE		hypothetical protein	459	152		Burkholderia glumae BGR1		COG5615	S	pfam05425		No	Yes
643882103	8		bglu_1g30310	FALSE	FALSE	FALSE	FALSE		Copper resistance D	933	310		Burkholderia glumae BGR1		COG1276	P	pfam05425		No	Yes
643892182	9		Bsubs1_010100002223	TRUE	FALSE	FALSE	TRUE		hypothetical protein	1626	541		Bacillus subtilis subtilis 168		COG1276	P	pfam04234 pfam05425 pfam13115		Yes	Yes
643896577	9		BsubsN3_010100002209	TRUE	FALSE	FALSE	TRUE		hypothetical protein	1626	541		Bacillus subtilis NCIB 3610		COG1276	P	pfam04234 pfam05425 pfam13115		Yes	Yes
643901122	9		BsubsJ_010100002228	TRUE	FALSE	FALSE	TRUE		hypothetical protein	1626	541		Bacillus subtilis subtilis JH642		COG1276	P	pfam04234 pfam05425 pfam13115		Yes	Yes
643905500	9		BsubsS_010100002239	TRUE	FALSE	FALSE	TRUE		hypothetical protein	1626	541		Bacillus subtilis subtilis SMY		COG1276	P	pfam04234 pfam05425 pfam13115		Yes	Yes
643937383	8		GHTCC_010100005934	FALSE	FALSE	FALSE	FALSE		putative copper export protein	888	295		Glaciecola sp. HTCC 2999		COG1276	P	pfam05425		No	Yes
644099642	2		PROPEN_04358	FALSE	FALSE	FALSE	FALSE		Copper resistance protein D.	192	63		Proteus penneri ATCC 35198				pfam05425		No	Yes
644125859	8		HMPREF0023_0015	FALSE	FALSE	FALSE	FALSE	copD	copper resistance protein D	882	293		Acinetobacter sp. ATCC 27244		COG1276	P	pfam05425		No	Yes
644132987	16		HMPREF0294_1415	FALSE	TRUE	FALSE	FALSE		copper resistance D precursor	1989	662		Corynebacterium glucuronolyticum ATCC 51867		COG3336	S	pfam05425 pfam09678		No	Yes
644204524	16		CORMATOL_01673	FALSE	TRUE	FALSE	FALSE		Putative copper export protein/Predicted membrane protein	2001	666		Corynebacterium matruchotii ATCC 33806		COG1276 COG3336	P S	pfam05425 pfam09678		No	Yes
644233539	8		BURMUCGD1_0542	FALSE	FALSE	FALSE	FALSE		copper resistance D domain protein	918	305		Burkholderia multivorans CGD1		COG1276	P	pfam05425		No	Yes
644233840	4		BURMUCGD1_0844	FALSE	FALSE	FALSE	FALSE		integral membrane protein	459	152		Burkholderia multivorans CGD1		COG5615	S	pfam05425		No	Yes
644241126	4		BURMUCGD2_1236	FALSE	FALSE	FALSE	FALSE		integral membrane protein	459	152		Burkholderia multivorans CGD2		COG5615	S	pfam05425		No	Yes
644242291	8		BURMUCGD2_0786	FALSE	FALSE	FALSE	FALSE		copper resistance D domain protein	933	310		Burkholderia multivorans CGD2		COG1276	P	pfam05425		No	Yes
644248534	4		BURMUCGD2M_1329	FALSE	FALSE	FALSE	FALSE		integral membrane protein	459	152		Burkholderia multivorans CGD2M		COG5615	S	pfam05425		No	Yes
644249133	8		BURMUCGD2M_0877	FALSE	FALSE	FALSE	FALSE		copper resistance D domain protein	933	310		Burkholderia multivorans CGD2M		COG1276	P	pfam05425		No	Yes
644278825	16		HMPREF0276_1628	FALSE	TRUE	FALSE	FALSE		copper resistance transporter	1965	654		Corynebacterium accolens ATCC 49725		COG3336	S	pfam05425 pfam09678		No	Yes
644279787	16		HMPREF0308_0234	FALSE	TRUE	FALSE	FALSE		copper resistance D domain protein	2121	706		Corynebacterium striatum ATCC 6940		COG3336	S	pfam05425 pfam09678		No	Yes
644301904	8		HMPREF0358_2325	FALSE	FALSE	FALSE	FALSE	yebZ	resistance protein	873	290		Escherichia coli 83972		COG1276	P	pfam05425		No	Yes
644342525	16		HMPREF0293_2182	FALSE	TRUE	FALSE	FALSE		copper resistance D precursor	1989	662		Corynebacterium glucuronolyticum ATCC 51866		COG3336	S	pfam05425 pfam09678		No	Yes
644348391	16		HMPREF0298_0904	FALSE	TRUE	FALSE	FALSE		copper resistance transporter	2157	718		Corynebacterium lipophiloflavum DSM 44291		COG3336	S	pfam05425 pfam09678		No	Yes
644348493	16		HMPREF0298_1000	FALSE	TRUE	FALSE	FALSE		copper resistance D domain protein	2013	670		Corynebacterium lipophiloflavum DSM 44291		COG3336	S	pfam05425 pfam09678		No	Yes
644379018	4		FuraDRAFT_3019	FALSE	FALSE	FALSE	FALSE		conserved hypothetical membrane spanning protein	462	153		Pseudogulbenkiania ferrooxidans 2002		COG5615	S	pfam05425		No	Yes
644414229	4		BUH_1055	FALSE	FALSE	FALSE	FALSE		conserved hypothetical protein	459	152		Burkholderia pseudomallei Pakistan 9		COG5615	S	pfam05425		No	Yes
644416405	8		BUH_4927	FALSE	FALSE	FALSE	FALSE		putative copper resistance protein D	948	315		Burkholderia pseudomallei Pakistan 9		COG1276	P	pfam05425		No	Yes
644416527	8		BUH_0642	FALSE	FALSE	FALSE	FALSE		copper resistance family protein	927	308		Burkholderia pseudomallei Pakistan 9		COG1276	P	pfam05425		No	Yes
644441822	8		HMPREF0693_0580	FALSE	FALSE	FALSE	FALSE		copper resistance protein	900	299		Proteus mirabilis ATCC 29906		COG1276	P	pfam05425		No	Yes
644455802	9		bcere0001_17170	TRUE	FALSE	FALSE	TRUE		Copper resistance protein	1650	549		Bacillus cereus m1293		COG1276	P	pfam04234 pfam05425 pfam13115		Yes	Yes
644461163	9		bcere0002_17130	TRUE	FALSE	FALSE	TRUE		Copper resistance protein	1650	549		Bacillus cereus ATCC 10876		COG1276	P	pfam04234 pfam05425 pfam13115		Yes	Yes
644467107	9		bcere0004_17150	TRUE	FALSE	FALSE	TRUE		Copper resistance protein	1650	549		Bacillus cereus BGSC 6E1		COG1276	P	pfam04234 pfam05425 pfam13115		Yes	Yes
644472864	9		bcere0005_17060	TRUE	FALSE	FALSE	TRUE		Copper resistance protein	1650	549		Bacillus cereus 172560W		COG1276	P	pfam04234 pfam05425 pfam13115		Yes	Yes
644478613	8		bcere0006_17480	FALSE	FALSE	FALSE	TRUE		Copper resistance protein	1320	439		Bacillus cereus MM3		COG1276	P	pfam05425 pfam13115		No	Yes
644484311	9		bcere0007_17830	TRUE	FALSE	FALSE	TRUE		Copper resistance protein	1650	549		Bacillus cereus AH621		COG1276	P	pfam04234 pfam05425 pfam13115		Yes	Yes
644489978	9		bcere0009_17020	TRUE	FALSE	FALSE	TRUE		Copper resistance protein	1644	547		Bacillus cereus R309803		COG1276	P	pfam04234 pfam05425 pfam13115		Yes	Yes
644495678	9		bcere0010_17180	TRUE	FALSE	FALSE	TRUE		Copper resistance protein	1650	549		Bacillus cereus ATCC 4342		COG1276	P	pfam04234 pfam05425 pfam13115		Yes	Yes
644501050	9		bcere0011_17290	TRUE	FALSE	FALSE	TRUE		Copper resistance protein	1650	549		Bacillus cereus mm1550		COG1276	P	pfam04234 pfam05425 pfam13115		Yes	Yes
644506371	9		bcere0012_17160	TRUE	FALSE	FALSE	TRUE		Copper resistance protein	1650	549		Bacillus cereus BDRD-ST24		COG1276	P	pfam04234 pfam05425 pfam13115		Yes	Yes
644511926	8		bcere0013_17590	TRUE	FALSE	FALSE	TRUE		Copper resistance protein	1365	454		Bacillus cereus BDRD-ST26		COG1276	P	pfam04234 pfam05425 pfam13115		No	Yes
644517736	8		bcere0014_17150	TRUE	FALSE	FALSE	TRUE		Copper resistance protein	1551	516		Bacillus cereus BDRD-ST196		COG1276	P	pfam04234 pfam05425 pfam13115		No	Yes
644523378	9		bcere0015_17200	TRUE	FALSE	FALSE	TRUE		Copper resistance protein	1650	549		Bacillus cereus BDRD-Cer4		COG1276	P	pfam04234 pfam05425 pfam13115		Yes	Yes
644528932	9		bcere0016_17970	TRUE	FALSE	FALSE	TRUE		Copper resistance protein	1650	549		Bacillus cereus 95/8201		COG1276	P	pfam04234 pfam05425 pfam13115		Yes	Yes
644534523	9		bcere0017_16780	TRUE	FALSE	FALSE	TRUE		Copper resistance protein	1650	549		Bacillus cereus Rock1-3		COG1276	P	pfam04234 pfam05425 pfam13115		Yes	Yes
644540422	9		bcere0018_16710	TRUE	FALSE	FALSE	TRUE		Copper resistance protein	1650	549		Bacillus cereus Rock1-15		COG1276	P	pfam04234 pfam05425 pfam13115		Yes	Yes
644546262	9		bcere0019_17100	TRUE	FALSE	FALSE	TRUE		Copper resistance protein	1650	549		Bacillus cereus Rock3-28		COG1276	P	pfam04234 pfam05425 pfam13115		Yes	Yes
644552104	9		bcere0020_17070	TRUE	FALSE	FALSE	TRUE		Copper resistance protein	1650	549		Bacillus cereus Rock3-29		COG1276	P	pfam04234 pfam05425 pfam13115		Yes	Yes
644558090	9		bcere0021_17440	TRUE	FALSE	FALSE	TRUE		Copper resistance protein	1650	549		Bacillus cereus Rock3-42		COG1276	P	pfam04234 pfam05425 pfam13115		Yes	Yes
644568260	9		bcere0023_17810	TRUE	FALSE	FALSE	TRUE		Copper resistance protein	1650	549		Bacillus cereus Rock4-2		COG1276	P	pfam04234 pfam05425 pfam13115		Yes	Yes
644576912	9		bcere0025_16930	TRUE	FALSE	FALSE	TRUE		Copper resistance protein	1650	549		Bacillus cereus F65185		COG1276	P	pfam04234 pfam05425 pfam13115		Yes	Yes
644583058	9		bcere0026_17190	TRUE	FALSE	FALSE	TRUE		Copper resistance protein	1650	549		Bacillus cereus AH603		COG1276	P	pfam04234 pfam05425 pfam13115		Yes	Yes
644588966	9		bcere0027_17500	TRUE	FALSE	FALSE	TRUE		Copper resistance protein	1650	549		Bacillus cereus AH676		COG1276	P	pfam04234 pfam05425 pfam13115		Yes	Yes
644594639	9		bcere0028_17290	TRUE	FALSE	FALSE	TRUE		Copper resistance protein	1650	549		Bacillus cereus AH1271		COG1276	P	pfam04234 pfam05425 pfam13115		Yes	Yes
644600393	9		bcere0029_17570	TRUE	FALSE	FALSE	TRUE		Copper resistance protein	1650	549		Bacillus cereus AH1272		COG1276	P	pfam04234 pfam05425 pfam13115		Yes	Yes
644606318	8		bcere0030_18020	FALSE	FALSE	FALSE	TRUE		Copper resistance protein	1227	408		Bacillus cereus AH1273		COG1276	P	pfam05425 pfam13115		No	Yes
644612157	9		bmyco0001_16940	TRUE	FALSE	FALSE	TRUE		Copper resistance protein	1650	549		Bacillus mycoides DSM 2048		COG1276	P	pfam04234 pfam05425 pfam13115		Yes	Yes
644629772	9		bpmyx0001_17240	TRUE	FALSE	FALSE	TRUE		Copper resistance protein	1689	562		Bacillus pseudomycoides DSM 12442		COG1276	P	pfam04234 pfam05425 pfam13115		Yes	Yes
644635728	9		bthur0001_17410	TRUE	FALSE	FALSE	TRUE		Copper resistance protein	1650	549		Bacillus thuringiensis sv tochigiensis BGSC 4Y1		COG1276	P	pfam04234 pfam05425 pfam13115		Yes	Yes
644641577	9		bthur0002_17590	TRUE	FALSE	FALSE	TRUE		Copper resistance protein	1650	549		Bacillus thuringiensis Bt407		COG1276	P	pfam04234 pfam05425 pfam13115		Yes	Yes
644647955	9		bthur0003_17220	TRUE	FALSE	FALSE	TRUE		Copper resistance protein	1650	549		Bacillus thuringiensis sv thuringiensis T01001		COG1276	P	pfam04234 pfam05425 pfam13115		Yes	Yes
644658171	9		bthur0004_56050	TRUE	FALSE	FALSE	TRUE		Copper resistance protein	1656	551		Bacillus thuringiensis sv sotto T04001		COG1276	P	pfam04234 pfam05425 pfam13115		Yes	Yes
644660990	9		bthur0005_17360	TRUE	FALSE	FALSE	TRUE		Copper resistance protein	1650	549		Bacillus thuringiensis sv pakistani t13001		COG1276	P	pfam04234 pfam05425 pfam13115		Yes	Yes
644667111	9		bthur0006_17240	TRUE	FALSE	FALSE	TRUE		Copper resistance protein	1650	549		Bacillus thuringiensis sv kurstaki T03a001		COG1276	P	pfam04234 pfam05425 pfam13115		Yes	Yes
644672739	9		bthur0007_17180	TRUE	FALSE	FALSE	TRUE		Copper resistance protein	1650	549		Bacillus thuringiensis sv monterrey BGSC 4AJ1		COG1276	P	pfam04234 pfam05425 pfam13115		Yes	Yes
644679314	9		bthur0008_17280	TRUE	FALSE	FALSE	TRUE		Copper resistance protein	1650	549		Bacillus thuringiensis sv berliner ATCC 10792		COG1276	P	pfam04234 pfam05425 pfam13115		Yes	Yes
644685642	9		bthur0009_17160	TRUE	FALSE	FALSE	TRUE		Copper resistance protein	1650	549		Bacillus thuringiensis sv andalousiensis BGSC 4AW1		COG1276	P	pfam04234 pfam05425 pfam13115		Yes	Yes
644691303	9		bthur0010_17240	TRUE	FALSE	FALSE	TRUE		Copper resistance protein	1650	549		Bacillus thuringiensis sv pondicheriensis BGSC 4BA1		COG1276	P	pfam04234 pfam05425 pfam13115		Yes	Yes
644697383	9		bthur0011_16610	TRUE	FALSE	FALSE	TRUE		Copper resistance protein	1656	551		Bacillus thuringiensis sv huazhongensis BGSC 4BD1		COG1276	P	pfam04234 pfam05425 pfam13115		Yes	Yes
644703590	9		bthur0012_17640	TRUE	FALSE	FALSE	TRUE		Copper resistance protein	1650	549		Bacillus thuringiensis sv pulsiensis BGSC 4CC1		COG1276	P	pfam04234 pfam05425 pfam13115		Yes	Yes
644709675	9		bthur0013_18280	TRUE	FALSE	FALSE	TRUE		Copper resistance protein	1650	549		Bacillus thuringiensis IBL200		COG1276	P	pfam04234 pfam05425 pfam13115		Yes	Yes
644716358	8		bthur0014_17380	TRUE	FALSE	FALSE	TRUE		Copper resistance protein	1407	468		Bacillus thuringiensis IBL4222		COG1276	P	pfam04234 pfam05425 pfam13115		No	Yes
644727827	9		RHOER0001_4107	FALSE	FALSE	FALSE	FALSE		copper resistance protein D	942	313		Rhodococcus erythropolis SK121		COG1276	P	pfam05425		No	Yes
644728307	16		RHOER0001_5668	FALSE	TRUE	FALSE	FALSE		ABC-type transporter, permease component	1929	642		Rhodococcus erythropolis SK121		COG1276 COG3336	P S	pfam05425 pfam09678		No	Yes
644729040	16		RHOER0001_5461	FALSE	TRUE	FALSE	FALSE		ABC-type transporter, permease component	2049	682		Rhodococcus erythropolis SK121		COG3336	S	pfam05425 pfam09678		No	Yes
644736358	16		CE3P024	FALSE	TRUE	FALSE	FALSE		hypothetical protein	2565	854		Corynebacterium efficiens YS-314		COG3336	S	pfam05425 pfam09678		No	Yes
644738767	16		CE2351	FALSE	TRUE	FALSE	FALSE		hypothetical protein	2220	739		Corynebacterium efficiens YS-314		COG3336	S	pfam05425 pfam09678		No	Yes
644748335	4		RALTA_A2019	FALSE	FALSE	FALSE	FALSE		Conserved hypothetical protein; putative transmembrane protein	462	153		Cupriavidus taiwanensis LMG 19424		COG5615	S	pfam05425		No	Yes
644751975	8		RALTA_B1965	FALSE	FALSE	FALSE	FALSE	copD	Copper resistance protein D	939	312		Cupriavidus taiwanensis LMG 19424		COG1276	P	pfam05425		No	Yes
644754201	8		ECS88_1894	FALSE	FALSE	FALSE	FALSE	yebZ	conserved hypothetical protein; putative inner membrane protein	873	290		Escherichia coli O45:K1 S88		COG1276	P	pfam05425		No	Yes
644759690	8		ECUMN_2135	FALSE	FALSE	FALSE	FALSE	yebZ	conserved hypothetical protein; putative inner membrane protein	873	290		Escherichia coli O17:K52:H18 UMN026		COG1276	P	pfam05425		No	Yes
644775496	8		BWG_1654	FALSE	FALSE	FALSE	FALSE	yebZ	putative inner membrane protein	873	290		Escherichia coli BW2952		COG1276	P	pfam05425		No	Yes
644790724	4		Vapar_0121	FALSE	FALSE	FALSE	FALSE		hypothetical protein	459	152		Variovorax paradoxus S110		COG5615	S	pfam05425		No	Yes
644806858	16		Mlut_19110	FALSE	TRUE	FALSE	FALSE		predicted membrane protein	2259	752		Micrococcus luteus NCTC 2665		COG3336	S	pfam05425 pfam09678		No	Yes
644822321	8		Rpic12D_5103	FALSE	FALSE	FALSE	FALSE		copper resistance D domain protein	930	309		Ralstonia pickettii 12D		COG1276	P	pfam05425		No	Yes
644822547	8		Rpic12D_5339	FALSE	FALSE	FALSE	FALSE		copper resistance D domain protein	930	309		Ralstonia pickettii 12D		COG1276	P	pfam05425		No	Yes
644832323	7		Rpic12D_3532	FALSE	FALSE	FALSE	FALSE		copper resistance D domain protein	945	314		Ralstonia pickettii 12D		COG1276	P	pfam05425		No	Yes
644836201	8		Dd703_2125	FALSE	FALSE	FALSE	FALSE		copper resistance D domain protein	879	292		Dickeya dadantii Ech703		COG1276	P	pfam05425		No	Yes
644852622	8		Dd1591_2237	FALSE	FALSE	FALSE	FALSE		copper resistance D domain protein	876	291		Dickeya zeae Ech1591		COG1276	P	pfam05425		No	Yes
644858143	10		Pjdr2_1131	FALSE	FALSE	FALSE	FALSE		copper resistance D domain protein	1080	359		Paenibacillus sp. JDR-2		COG1276	P	pfam05425		No	Yes
644861334	10		Pjdr2_4362	FALSE	FALSE	FALSE	FALSE		Putative copper export protein-like protein	1086	361		Paenibacillus sp. JDR-2		COG1276	P	pfam05425		No	Yes
644862825	9		Pjdr2_5844	TRUE	FALSE	FALSE	FALSE		copper resistance protein CopC	1620	539		Paenibacillus sp. JDR-2		COG1276	P	pfam04234 pfam05425		Yes	Yes
644867875	4		GM21_0254	FALSE	FALSE	FALSE	FALSE		cytochrome b5	927	308		Geobacter sp. M21		COG4892	R	pfam00173 pfam05425		Yes	Yes
644877783	16		TBMG_00103	FALSE	TRUE	FALSE	FALSE		hypothetical protein	1986	661		Mycobacterium tuberculosis KZN 1435 (MDR)		COG3336	S	pfam05425 pfam09678		No	Yes
644883594	8		ECBD_1800	FALSE	FALSE	FALSE	FALSE		copper resistance D domain protein	873	290		Escherichia coli BL21(DE3)		COG1276	P	pfam05425		No	Yes
644888232	8		PAU_01849	FALSE	FALSE	FALSE	FALSE		putative copper transporter	894	297		Photorhabdus asymbiotica asymbiotica ATCC 43949		COG1276	P	pfam05425		No	Yes
644892667	8		ECB_01811	FALSE	FALSE	FALSE	FALSE	yebZ	predicted inner membrane protein	873	290		Escherichia coli B REL606		COG1276	P	pfam05425		No	Yes
644902656	8		Hbal_0697	FALSE	FALSE	FALSE	FALSE		copper resistance D domain protein	828	275		Hirschia baltica ATCC 49814		COG1276	P	pfam05425		No	Yes
644921876	8		ECSP_2414	FALSE	FALSE	FALSE	FALSE	yebZ	predicted inner membrane protein	873	290		Escherichia coli O157:H7 TW14359		COG1276	P	pfam05425		No	Yes
644940578	9		Amir_0040	FALSE	FALSE	FALSE	FALSE		copper resistance D domain protein	1020	339		Actinosynnema mirum 101, DSM 43827		COG1276	P	pfam05425		No	Yes
644941668	15		Amir_1122	FALSE	TRUE	FALSE	FALSE		copper resistance D domain protein	2064	687		Actinosynnema mirum 101, DSM 43827		COG3336	S	pfam05425 pfam09678		No	Yes
644954274	9		Caci_1126	TRUE	FALSE	FALSE	FALSE		copper resistance protein CopC	1683	560		Catenulispora acidiphila ID139908, DSM 44928		COG1276	P	pfam04234 pfam05425		Yes	Yes
644955209	9		Caci_2060	FALSE	FALSE	FALSE	FALSE		copper resistance D domain protein	1203	400		Catenulispora acidiphila ID139908, DSM 44928		COG1276	P	pfam05425		No	Yes
644956212	9		Caci_3065	TRUE	FALSE	FALSE	FALSE		copper resistance protein CopC	1737	578		Catenulispora acidiphila ID139908, DSM 44928		COG2372	R	pfam04234 pfam05425 pfam05751		Yes	Yes
644956347	9		Caci_3202	TRUE	FALSE	FALSE	FALSE		copper resistance protein CopC	1767	588		Catenulispora acidiphila ID139908, DSM 44928		COG2372	R	pfam04234 pfam05425		Yes	Yes
644956714	9		Caci_3571	TRUE	FALSE	FALSE	FALSE		copper resistance protein CopC	1695	564		Catenulispora acidiphila ID139908, DSM 44928		COG2372	R	pfam04234 pfam05425		Yes	Yes
644957087	8		Caci_3973	TRUE	FALSE	FALSE	FALSE		copper resistance protein CopC	1698	565		Catenulispora acidiphila ID139908, DSM 44928		COG2372	R	pfam04234 pfam05425		Yes	Yes
644972000	3		Huta_0936	FALSE	FALSE	FALSE	FALSE		hypothetical protein	450	149		Halorhabdus utahensis AX-2, DSM 12940				pfam05425		No	Yes
644974162	9		Svir_00580	FALSE	FALSE	FALSE	FALSE		putative copper export protein	1032	343		Saccharomonospora viridis P101, DSM 43017		COG1276	P	pfam05425		No	Yes
644975264	16		Svir_11750	FALSE	TRUE	FALSE	FALSE		predicted membrane protein	1956	651		Saccharomonospora viridis P101, DSM 43017		COG3336	S	pfam05425 pfam09678		No	Yes
644992873	15		Ksed_26540	FALSE	TRUE	FALSE	FALSE		predicted membrane protein	1896	631		Kytococcus sedentarius 541, DSM 20547		COG3336	S	pfam05425 pfam09678		No	Yes
644998247	16		Bfae_21870	FALSE	TRUE	FALSE	FALSE		predicted membrane protein	2016	671		Brachybacterium faecium 6-10, DSM 4810		COG3336	S	pfam05425 pfam09678		Yes	Yes
644998583	16		Bfae_25350	FALSE	TRUE	FALSE	FALSE		putative copper export protein	1815	604		Brachybacterium faecium 6-10, DSM 4810		COG1276	P	pfam05425 pfam09678		No	Yes
645005213	16		Jden_2448	FALSE	TRUE	FALSE	FALSE		copper resistance D domain protein	2064	687		Jonesia denitrificans 55134, DSM 20603		COG3336	S	pfam05425 pfam09678		No	Yes
645008255	3		CAP2UW1_0434	FALSE	FALSE	FALSE	FALSE		hypothetical protein	465	154		Candidatus Accumulibacter phosphatis Type IIA UW-1				pfam05425		No	Yes
645011410	4		CAP2UW1_3646	FALSE	FALSE	FALSE	FALSE		hypothetical protein	468	155		Candidatus Accumulibacter phosphatis Type IIA UW-1		COG5615	S	pfam05425		No	Yes
645018505	4		Hmuk_0180	FALSE	FALSE	FALSE	FALSE		hypothetical protein	417	138		Halomicrobium mukohataei arg-2, DSM 12286				pfam05425		No	Yes
645028751	9		Aaci_2624	TRUE	FALSE	FALSE	FALSE		copper resistance protein CopC	1641	546		Alicyclobacillus acidocaldarius acidocaldarius 104-IA, DSM 446		COG2372	R	pfam04234 pfam05425		Yes	Yes
645040205	8		Namu_1067	TRUE	FALSE	FALSE	TRUE		copper resistance protein CopC	1782	593		Nakamurella multipartita Y-104, DSM 44233		COG1276	P	pfam04234 pfam05425 pfam13115		Yes	Yes
645040938	16		Namu_1809	FALSE	TRUE	FALSE	FALSE		copper resistance D domain protein	2061	686		Nakamurella multipartita Y-104, DSM 44233		COG3336	S	pfam05425 pfam09678		No	Yes
645062858	4		BthaA_010200011551	FALSE	FALSE	FALSE	FALSE		hypothetical protein	459	152		Burkholderia thailandensis E264, ATCC 700388		COG5615	S	pfam05425		No	Yes
645063210	8		BthaA_010200013350	FALSE	FALSE	FALSE	FALSE		copper resistance protein, putative	927	308		Burkholderia thailandensis E264, ATCC 700388		COG1276	P	pfam05425		No	Yes
645063822	8		BthaA_010200016478	FALSE	FALSE	FALSE	FALSE		copper resistance protein, putative	948	315		Burkholderia thailandensis E264, ATCC 700388		COG1276	P	pfam05425		No	Yes
645068613	8		BantC_010100011715	TRUE	FALSE	FALSE	TRUE		hypothetical protein	1617	538		Bacillus anthracis CNEVA-9066		COG1276	P	pfam04234 pfam05425 pfam13115		Yes	Yes
645072618	8		BantA1_010100002255	TRUE	FALSE	FALSE	TRUE		hypothetical protein	1617	538		Bacillus anthracis A1055		COG1276	P	pfam04234 pfam05425 pfam13115		Yes	Yes
645082583	8		BantV_010100023602	TRUE	FALSE	FALSE	TRUE		hypothetical protein	1617	538		Bacillus anthracis Vollum		COG1276	P	pfam04234 pfam05425 pfam13115		Yes	Yes
645085684	8		BantKB_010100009422	TRUE	FALSE	FALSE	TRUE		hypothetical protein	1617	538		Bacillus anthracis Kruger B		COG1276	P	pfam04234 pfam05425 pfam13115		Yes	Yes
645090993	8		BantWNA_010100006540	TRUE	FALSE	FALSE	TRUE		hypothetical protein	1617	538		Bacillus anthracis WesternNA USA6153		COG1276	P	pfam04234 pfam05425 pfam13115		Yes	Yes
645099078	8		BantA9_010100016961	TRUE	FALSE	FALSE	TRUE		hypothetical protein	1617	538		Bacillus anthracis Australia 94		COG1276	P	pfam04234 pfam05425 pfam13115		Yes	Yes
645102576	8		CtesDRAFT_PD0893	FALSE	FALSE	FALSE	FALSE		copper resistance D domain protein	927	308		Comamonas testosteroni KF-1		COG1276	P	pfam05425		No	Yes
645104297	4		CtesDRAFT_PD2594	FALSE	FALSE	FALSE	FALSE		conserved hypothetical protein	498	165		Comamonas testosteroni KF-1		COG5615	S	pfam05425		No	Yes
645126433	7		MintA_010100019062	FALSE	FALSE	FALSE	FALSE		ABC-type transporter, permease components	846	282		Mycobacterium intracellulare ATCC 13950		COG1276	P	pfam05425		No	Yes
645190079	16		Mtube_010100000991	FALSE	TRUE	FALSE	FALSE		hypothetical protein	1986	661		Mycobacterium tuberculosis 98-R604 INH-RIF-EM		COG3336	S	pfam05425 pfam09678		No	Yes
645199299	9		AbauAB_010100007332	FALSE	FALSE	FALSE	FALSE		copper resistance D	987	328		Acinetobacter baumannii AB900		COG1276	P	pfam05425		No	Yes
645205306	9		SghaA1_010100018612	TRUE	FALSE	FALSE	FALSE		hypothetical protein	2046	681		Streptomyces ghanaensis ATCC 14672		COG1276	P	pfam04234 pfam05425		Yes	Yes
645207190	7		SghaA1_010100027974	FALSE	FALSE	FALSE	FALSE		membrane protein	927	308		Streptomyces ghanaensis ATCC 14672		COG1276	P	pfam05425		Yes	Yes
645212904	8		SrosN15_010100017274	TRUE	FALSE	FALSE	FALSE		putative integral membrane protein	1941	646		Streptomyces roseosporus NRRL 15998		COG2372	R	pfam04234 pfam05425		Yes	Yes
645217437	9		SalbJ_010100005010	FALSE	FALSE	FALSE	FALSE		membrane protein	1083	360		Streptomyces albus J1074		COG1276	P	pfam05425		No	Yes
645219565	8		SalbJ_010100015621	TRUE	FALSE	FALSE	FALSE		hypothetical protein	2043	680		Streptomyces albus J1074		COG1276	P	pfam04234 pfam05425		Yes	Yes
645230002	8		SrosN1_010100018041	TRUE	FALSE	FALSE	FALSE		putative integral membrane protein	1941	646		Streptomyces roseosporus NRRL 11379		COG2372	R	pfam04234 pfam05425		Yes	Yes
645231662	8		SrosN1_010100026339	FALSE	FALSE	FALSE	FALSE		hypothetical protein	1059	352		Streptomyces roseosporus NRRL 11379		COG1276	P	pfam05425		No	Yes
645284114	8		SentesTe_010100004624	FALSE	FALSE	FALSE	FALSE		copper resistance protein	930	309		Salmonella enterica enterica sv Tennessee CDC07-0191		COG1276	P	pfam05425		No	Yes
645285797	8		SentesTe_010100013176	FALSE	FALSE	FALSE	FALSE		putative cation transporter	876	291		Salmonella enterica enterica sv Tennessee CDC07-0191		COG1276	P	pfam05425		No	Yes
645329457	8		ykris0001_2210	FALSE	FALSE	FALSE	FALSE		Copper resistance protein D	885	294		Yersinia kristensenii ATCC 33638		COG1276	P	pfam05425		No	Yes
645334438	7		yaldo0001_18890	FALSE	FALSE	FALSE	FALSE		Copper resistance protein D	831	276		Yersinia aldovae ATCC 35236		COG1276	P	pfam05425		No	Yes
645339307	8		yruck0001_12270	FALSE	FALSE	FALSE	FALSE		Copper resistance protein D	885	294		Yersinia ruckeri ATCC 29473		COG1276	P	pfam05425		No	Yes
645340484	8		yrohd0001_28800	FALSE	FALSE	FALSE	FALSE		Copper resistance protein D	885	294		Yersinia rohdei ATCC 43380		COG1276	P	pfam05425		No	Yes
645344866	8		ShiD9_010100003572	FALSE	FALSE	FALSE	FALSE		hypothetical protein	873	290		Shigella sp. D9		COG1276	P	pfam05425		No	Yes
645386589	8		StreC_010100018867	TRUE	FALSE	FALSE	FALSE		putative integral membrane protein	2037	678		Streptomyces sp. C		COG2372	R	pfam04234 pfam05425		Yes	Yes
645395281	8		ShygA5_010100023874	TRUE	FALSE	FALSE	FALSE		putative integral membrane protein	2112	703		Streptomyces hygroscopicus ATCC 53653		COG2372	R	pfam04234 pfam05425		Yes	Yes
645403862	8		SlivT_010100018436	TRUE	FALSE	FALSE	FALSE		transport integral membrane protein	1770	589		Streptomyces lividans TK24		COG2372	R	pfam04234 pfam05425		Yes	Yes
645403934	9		SlivT_010100018784	TRUE	FALSE	FALSE	FALSE		hypothetical protein	1970	657		Streptomyces lividans TK24		COG2372	R	pfam04234 pfam05425		Yes	Yes
645405992	7		SlivT_010100029096	FALSE	FALSE	FALSE	FALSE		membrane protein	1008	335		Streptomyces lividans TK24		COG1276	P	pfam05425		No	Yes
645409584	7		SvirD4_010100008856	FALSE	FALSE	FALSE	FALSE		membrane protein	1041	346		Streptomyces viridochromogenes DSM 40736		COG1276	P	pfam05425		No	Yes
645411676	8		SvirD4_010100019383	TRUE	FALSE	FALSE	FALSE		hypothetical protein	1902	633		Streptomyces viridochromogenes DSM 40736		COG1276	P	pfam04234 pfam05425		Yes	Yes
645411748	8		SvirD4_010100019767	TRUE	FALSE	FALSE	FALSE		hypothetical protein	2112	703		Streptomyces viridochromogenes DSM 40736		COG2372	R	pfam04234 pfam05425		Yes	Yes
645419361	8		SgriT_010100018853	TRUE	FALSE	FALSE	FALSE		putative integral membrane protein	1899	632		Streptomyces griseoflavus Tu4000		COG2372	R	pfam04234 pfam05425		Yes	Yes
645421254	7		SgriT_010100028425	FALSE	FALSE	FALSE	FALSE		membrane protein	957	318		Streptomyces griseoflavus Tu4000		COG1276	P	pfam05425		No	Yes
645424369	16		MaviaA2_010100007553	FALSE	TRUE	FALSE	FALSE		hypothetical protein	2070	689		Mycobacterium avium avium ATCC 25291		COG3336	S	pfam05425 pfam09678		No	Yes
645489613	8		YP516_2634	FALSE	FALSE	FALSE	FALSE		putative copper resistance protein D	885	294		Yersinia pestis Nepal516		COG1276	P	pfam05425		No	Yes
645493903	8		YPF_2300	FALSE	FALSE	FALSE	FALSE		putative copper resistance protein D	885	294		Yersinia pestis bv Orientalis India 195		COG1276	P	pfam05425		No	Yes
645500526	8		YPH_4177	FALSE	FALSE	FALSE	FALSE		putative copper resistance protein D	885	294		Yersinia pestis bv Orientalis PEXU2		COG1276	P	pfam05425		No	Yes
645505178	8		YPS_4042	FALSE	FALSE	FALSE	FALSE		putative copper resistance protein D	885	294		Yersinia pestis Pestoides A		COG1276	P	pfam05425		No	Yes
645542132	8		OINT_2001774	FALSE	FALSE	TRUE	FALSE		Copper resistance protein D	1824	607		Ochrobactrum intermedium LMG 3301		COG1276	P	pfam05425 pfam13442		No	Yes
645556879	4		AcdelDRAFT_1680	FALSE	FALSE	FALSE	FALSE		conserved hypothetical protein	468	155		Acidovorax delafieldii 2AN		COG5615	S	pfam05425		No	Yes
645630436	16		CORTU0001_1021	FALSE	TRUE	FALSE	FALSE		ABC-type transporter, permease component	2052	683		Corynebacterium tuberculostearicum SK141		COG3336	S	pfam05425 pfam09678		No	Yes
645637035	8		ACIRA0001_1945	FALSE	FALSE	FALSE	FALSE		copper resistance D	882	293		Acinetobacter radioresistens SK82		COG1276	P	pfam05425		No	Yes
645970786	5		SSPB78_010100005504	FALSE	FALSE	FALSE	FALSE		hypothetical protein	561	186		Streptomyces sp. SPB78				pfam05425		No	Yes
645978654	8		StAA4_010100012110	FALSE	FALSE	FALSE	FALSE		hypothetical protein	915	304		Streptomyces sp. AA4		COG1276	P	pfam05425		No	Yes
645981811	16		StAA4_010100027896	FALSE	TRUE	FALSE	FALSE		copper resistance transporter	1998	665		Streptomyces sp. AA4		COG3336	S	pfam05425 pfam09678		Yes	Yes
645984264	9		StAA4_010100040123	FALSE	FALSE	FALSE	FALSE		copper resistance D domain protein	1029	342		Streptomyces sp. AA4		COG1276	P	pfam05425		No	Yes
646008582	16		MtubT4_010100002875	FALSE	TRUE	FALSE	FALSE		hypothetical protein	1986	661		Mycobacterium tuberculosis T46		COG3336	S	pfam05425 pfam09678		No	Yes
646012749	16		MtubCP_010100002752	FALSE	TRUE	FALSE	FALSE		hypothetical protein	1986	661		Mycobacterium tuberculosis CPHL_A		COG3336	S	pfam05425 pfam09678		No	Yes
646016966	16		MtubK8_010100002875	FALSE	TRUE	FALSE	FALSE		hypothetical protein	1986	661		Mycobacterium tuberculosis K85		COG3336	S	pfam05425 pfam09678		No	Yes
646024857	8		PsyrptA_020100021101	FALSE	FALSE	FALSE	FALSE		copper resistance D	936	311		Pseudomonas syringae pv. tabaci ATCC 11528		COG1276	P	pfam05425		No	Yes
646025747	4		PsyrptA_020100025555	FALSE	FALSE	FALSE	FALSE		hypothetical protein	465	154		Pseudomonas syringae pv. tabaci ATCC 11528		COG5615	S	pfam05425		No	Yes
646092782	16		AmarD1_010100007255	FALSE	TRUE	FALSE	FALSE		copper resistance transporter	1962	653		Aeromicrobium marinum DSM 15272		COG3336	S	pfam05425 pfam09678		No	Yes
646093295	9		AmarD1_010100009828	FALSE	TRUE	FALSE	FALSE		predicted membrane protein	1231	409		Aeromicrobium marinum DSM 15272		COG3336	S	pfam05425 pfam09678		No	Yes
646100496	14		CaurA7_010100012877	FALSE	TRUE	FALSE	FALSE		hypothetical protein	2073	690		Corynebacterium aurimucosum ATCC 700975		COG3336	S	pfam05425 pfam09678		No	Yes
646101175	16		HMPREF0290_0586	FALSE	TRUE	FALSE	FALSE		copper resistance D	2049	682		Corynebacterium efficiens YS-314, DSM 44549		COG3336	S	pfam05425 pfam09678		No	Yes
646103009	16		HMPREF0290_2391	FALSE	TRUE	FALSE	FALSE		ABC superfamily ATP binding cassette transporter, permease protein	2067	688		Corynebacterium efficiens YS-314, DSM 44549		COG3336	S	pfam05425 pfam09678		No	Yes
646154432	8		EscherichiacoliO157EcO_010100020472	FALSE	FALSE	FALSE	FALSE		predicted inner membrane protein	873	290		Escherichia coli O157:H7 FRIK966		COG1276	P	pfam05425		No	Yes
646160540	8		EscherichiacoliO157_010100024126	FALSE	FALSE	FALSE	FALSE		predicted inner membrane protein	873	290		Escherichia coli O157:H7 FRIK2000		COG1276	P	pfam05425		No	Yes
646163611	4		CAMGR0001_0228	FALSE	FALSE	FALSE	FALSE		protein translocation protein, low temperature	444	147		Campylobacter gracilis RM3268		COG3399	S	pfam05425		No	Yes
646187572	16		MlutN2_010100009449	FALSE	TRUE	FALSE	FALSE		predicted membrane protein	2259	752		Micrococcus luteus NCTC 2665		COG3336	S	pfam05425 pfam09678		No	Yes
646208804	8		ESAG_02520	FALSE	FALSE	FALSE	FALSE		conserved hypothetical protein	873	290		Escherichia sp. 3_2_53FAA		COG1276	P	pfam05425		No	Yes
646245330	8		CSAG_01689	FALSE	FALSE	FALSE	FALSE		conserved hypothetical protein	873	290		Citrobacter sp. 30_2		COG1276	P	pfam05425		No	Yes
646247909	8		CSAG_04234	FALSE	FALSE	FALSE	FALSE		pcoD	930	309		Citrobacter sp. 30_2		COG1276	P	pfam05425		No	Yes
646301655	8		HMPREF0016_02531	FALSE	FALSE	FALSE	FALSE		copper resistance D	927	308		Acinetobacter johnsonii SH046		COG1276	P	pfam05425		No	Yes
646305285	8		HMPREF0026_02726	FALSE	FALSE	FALSE	FALSE		copper resistance protein D	882	293		Acinetobacter junii SH205		COG1276	P	pfam05425		No	Yes
646308576	8		HMPREF0017_02765	FALSE	FALSE	FALSE	FALSE		copper resistance protein D	927	308		Acinetobacter lwoffii SH145		COG1276	P	pfam05425		No	Yes
646311768	8		HMPREF0018_02764	FALSE	FALSE	FALSE	FALSE		copper resistance protein D	927	308		Acinetobacter radioresistens SH164		COG1276	P	pfam05425		No	Yes
646313789	8		b1840	FALSE	FALSE	FALSE	FALSE	yebZ	inner membrane protein	873	290		Escherichia coli K-12, MG1655		COG1276	P	pfam05425		No	Yes
646316847	9		BSU03950	TRUE	FALSE	FALSE	TRUE	ycnJ	putative copper import protein	1626	541		Bacillus subtilis subtilis 168		COG1276	P	pfam04234 pfam05425 pfam13115		Yes	Yes
646330379	6		Ctu_25230	FALSE	FALSE	FALSE	FALSE	yebZ	Inner membrane protein yebZ	705	234		Cronobacter turicensis z3032		COG1276	P	pfam05425		No	Yes
646332338	8		Ctu_3p00520	FALSE	FALSE	FALSE	FALSE	pcoD	Copper resistance protein D	930	309		Cronobacter turicensis z3032		COG1276	P	pfam05425		No	Yes
646341461	8		ECO103_2031	FALSE	FALSE	FALSE	FALSE	yebZ	putative inner membrane protein	873	290		Escherichia coli O103:H2 12009		COG1276	P	pfam05425		No	Yes
646354638	8		ECO111_2348	FALSE	FALSE	FALSE	FALSE	yebZ	putative inner membrane protein	873	290		Escherichia coli O111:H 11128		COG1276	P	pfam05425		No	Yes
646362659	10		GYMC10_2467	FALSE	FALSE	FALSE	FALSE		copper resistance D domain protein	1089	362		Paenibacillus lautus Y412MC10		COG1276	P	pfam05425		No	Yes
646384589	4		Hneap_2208	FALSE	FALSE	FALSE	FALSE		hypothetical protein	453	150		Halothiobacillus neapolitanus c2, ATCC 23641		COG5615	S	pfam05425		No	Yes
646392686	8		Gbro_1161	FALSE	FALSE	FALSE	FALSE		copper resistance D domain protein	933	310		Gordonia bronchialis 3410, DSM 43247		COG1276	P	pfam05425		No	Yes
646393510	16		Gbro_2024	FALSE	TRUE	FALSE	FALSE		Cytochrome c oxidase caa3-type, assembly factor CtaG-related protein	2028	675		Gordonia bronchialis 3410, DSM 43247		COG3336	S	pfam05425 pfam09678		No	Yes
646411580	4		Rmar_2288	FALSE	FALSE	FALSE	FALSE		copper resistance D	501	166		Rhodothermus marinus R-10, DSM 4252		COG5615	S	pfam05425		No	Yes
646420813	16		Tcur_3124	FALSE	TRUE	FALSE	FALSE		copper resistance D domain protein	2046	681		Thermomonospora curvata DSM 43183		COG3336	S	pfam05425 pfam09678		Yes	Yes
646421503	16		Tcur_3816	FALSE	TRUE	FALSE	FALSE		copper resistance D domain protein	1956	651		Thermomonospora curvata DSM 43183		COG3336	S	pfam05425 pfam09678		No	Yes
646437998	9		Sthe_3008	TRUE	FALSE	FALSE	FALSE		copper resistance protein CopC	2262	753		Sphaerobacter thermophilus 4ac11, DSM 20745		COG1276	P	pfam04234 pfam05425		No	Yes
646438279	9		Sthe_3292	TRUE	FALSE	FALSE	TRUE		copper resistance protein CopC	2271	756		Sphaerobacter thermophilus 4ac11, DSM 20745		COG1276	P	pfam04234 pfam05425 pfam13115		Yes	Yes
646439659	8		Tter_1118	TRUE	FALSE	FALSE	TRUE		copper resistance protein CopC	1992	663		Thermobaculum terrenum YNP1, ATCC BAA-798		COG1276	P	pfam04234 pfam05425 pfam13115		Yes	Yes
646440703	4		Tter_2155	FALSE	FALSE	FALSE	FALSE		copper resistance D	495	164		Thermobaculum terrenum YNP1, ATCC BAA-798				pfam05425		No	Yes
646444644	16		Xcel_3220	FALSE	TRUE	FALSE	FALSE		copper resistance D domain protein	2136	711		Xylanimonas cellulosilytica XIL07, DSM 15894		COG3336	S	pfam05425 pfam09678		Yes	Yes
646449545	8		Dd586_2180	FALSE	FALSE	FALSE	FALSE		copper resistance D domain protein	879	292		Dickeya dadantii Ech586		COG1276	P	pfam05425		No	Yes
646454116	16		Sros_2572	FALSE	TRUE	FALSE	FALSE		membrane protein-like protein	2037	678		Streptosporangium roseum NI 9100, DSM 43021		COG3336	S	pfam05425 pfam09678		No	Yes
646458148	9		Sros_6848	FALSE	FALSE	FALSE	FALSE		hypothetical protein	1032	343		Streptosporangium roseum NI 9100, DSM 43021		COG1276	P	pfam05425		No	Yes
646474125	8		ROD_18791	FALSE	FALSE	FALSE	FALSE		putative copper resistance protein	873	290		Citrobacter rodentium ICC168		COG1276	P	pfam05425		No	Yes
646490729	9		Kfla_4172	TRUE	FALSE	FALSE	FALSE		copper resistance protein CopC	1665	554		Kribbella flavida IFO 14399, DSM 17836		COG1276	P	pfam04234 pfam05425		Yes	Yes
646492142	7		Kfla_5612	FALSE	FALSE	FALSE	FALSE		hypothetical protein	963	320		Kribbella flavida IFO 14399, DSM 17836				pfam05425		No	Yes
646492280	9		Kfla_5749	FALSE	FALSE	FALSE	FALSE		hypothetical protein	984	327		Kribbella flavida IFO 14399, DSM 17836				pfam05425		Yes	Yes
646506403	8		Cwoe_5776	TRUE	FALSE	FALSE	TRUE		copper resistance protein CopC	1734	577		Conexibacter woesei ID131577, DSM 14684		COG1276	P	pfam04234 pfam05425 pfam13115		Yes	Yes
646516963	9		Gobs_1275	TRUE	FALSE	FALSE	FALSE		copper resistance protein CopC	1818	605		Geodermatophilus obscurus G-20, DSM 43160		COG1276	P	pfam04234 pfam05425		No	Yes
646522902	9		LM5578_2263	TRUE	FALSE	FALSE	FALSE		hypothetical protein	1626	541		Listeria monocytogenes 08-5578		COG1276	P	pfam04234 pfam05425		Yes	Yes
646526020	9		LM5923_2214	TRUE	FALSE	FALSE	FALSE		hypothetical protein	1626	541		Listeria monocytogenes 08-5923		COG1276	P	pfam04234 pfam05425		Yes	Yes
646537241	10		BpOF4_19225	FALSE	FALSE	FALSE	FALSE		hypothetical protein	1620	539		Bacillus pseudofirmus OF4		COG1276	P	pfam05425		No	Yes
646537412	9		BpOF4_20289	TRUE	FALSE	FALSE	FALSE		copper resistance protein	1812	603		Bacillus pseudofirmus OF4		COG1276	P	pfam04234 pfam05425		No	Yes
646541829	4		HTH_1732	FALSE	FALSE	FALSE	FALSE		hypothetical protein	453	150		Hydrogenobacter thermophilus TK-6, DSM 6534				pfam05425		No	Yes
646543798	8		Kvar_1752	FALSE	FALSE	FALSE	FALSE		copper resistance D domain protein	870	289		Klebsiella variicola At-22		COG1276	P	pfam05425		No	Yes
646551225	8		AZL_007870	TRUE	FALSE	FALSE	FALSE		hypothetical protein	1857	618		Azospirillum sp. B510		COG1276	P	pfam04234 pfam05425		No	Yes
646564511	9		BMQ_pBM40012	TRUE	FALSE	FALSE	FALSE		putative copper export protein	1605	534		Bacillus megaterium QM B1551		COG1276	P	pfam04234 pfam05425		Yes	Yes
646564689	8		pK2044_00565	FALSE	FALSE	FALSE	FALSE		copper resistant protein PcoD	930	309		Klebsiella pneumoniae NTUH-K2044		COG1276	P	pfam05425		No	Yes
646581449	5		ROP_pROB01-02060	FALSE	FALSE	FALSE	FALSE		hypothetical membrane protein	1005	334		Rhodococcus opacus B4				pfam05425		No	Yes
646581507	16		ROP_pROB01-02640	FALSE	TRUE	FALSE	FALSE		putative copper resistance protein	1935	644		Rhodococcus opacus B4		COG3336	S	pfam05425 pfam09678		No	Yes
646583206	16		ROP_11110	FALSE	TRUE	FALSE	FALSE		hypothetical membrane protein	2031	676		Rhodococcus opacus B4		COG3336	S	pfam05425 pfam09678		No	Yes
646585982	9		ROP_38700	FALSE	FALSE	FALSE	FALSE		putative copper resistance protein	939	312		Rhodococcus opacus B4		COG1276	P	pfam05425		Yes	Yes
646598753	8		KP1_3485	FALSE	FALSE	FALSE	FALSE	yebZ	putative cation transporter	870	289		Klebsiella pneumoniae NTUH-K2044		COG1276	P	pfam05425		No	Yes
646609031	16		Sked_16830	FALSE	TRUE	FALSE	FALSE		predicted membrane protein	2127	708		Sanguibacter keddieii ST-74, DSM 10542		COG3336	S	pfam05425 pfam09678		No	Yes
646610902	16		Sked_35680	FALSE	TRUE	FALSE	FALSE		predicted membrane protein	2127	708		Sanguibacter keddieii ST-74, DSM 10542		COG3336	S	pfam05425 pfam09678		No	Yes
646624909	4		TK90_0527	FALSE	FALSE	FALSE	FALSE		hypothetical protein	468	155		Thioalkalivibrio sp. K90mix		COG5615	S	pfam05425		No	Yes
646626618	8		TK90_2222	FALSE	FALSE	FALSE	FALSE		copper resistance D domain protein	909	302		Thioalkalivibrio sp. K90mix		COG1276	P	pfam05425		No	Yes
646630550	9		lse_2042	TRUE	FALSE	FALSE	FALSE		copper resistance domain protein	1629	542		Listeria seeligeri sv 1/2b, SLCC3954		COG1276	P	pfam04234 pfam05425		Yes	Yes
646633772	8		XBJ1_2555	FALSE	FALSE	FALSE	FALSE	yebZ	putative resistance protein	945	314		Xenorhabdus bovienii SS-2004		COG1276	P	pfam05425		No	Yes
646644713	10		Nmag_0946	TRUE	FALSE	FALSE	FALSE		copper resistance protein CopC	2094	697		Natrialba magadii ATCC 43099		COG1276	P	pfam04234 pfam05425		No	Yes
646652723	9		SCAB_12001	TRUE	FALSE	FALSE	FALSE		putative transport integral membrane protein	1971	656		Streptomyces scabiei 87.22		COG2372	R	pfam04234 pfam05425 pfam05751		No	Yes
646656076	8		SCAB_46591	TRUE	FALSE	FALSE	FALSE		putative copper-binding protein	2004	667		Streptomyces scabiei 87.22		COG2372	R	pfam04234 pfam05425		Yes	Yes
646656163	9		SCAB_47441	TRUE	FALSE	FALSE	FALSE		putative copper-binding protein	2031	676		Streptomyces scabiei 87.22		COG1276	P	pfam04234 pfam05425		No	Yes
646658512	7		SCAB_71191	FALSE	FALSE	FALSE	FALSE		putative copper uptake protein	936	311		Streptomyces scabiei 87.22				pfam05425		Yes	Yes
646665398	8		G2583_2292	FALSE	FALSE	FALSE	FALSE	yebZ	Copper resistance protein D	873	290		Escherichia coli O55:H7 CB9615		COG1276	P	pfam05425		No	Yes
646673071	8		Mrub_1602	FALSE	FALSE	FALSE	FALSE		copper resistance D domain-containing protein	1152	383		Meiothermus ruber 21, DSM 1279		COG1276	P	pfam05425		No	Yes
646680248	11		Snas_5782	TRUE	FALSE	FALSE	FALSE		copper resistance protein CopC	2610	869		Stackebrandtia nassauensis LLR-40K-21, DSM 44728				pfam04234 pfam05425		Yes	Yes
646680643	16		Snas_6178	FALSE	TRUE	FALSE	FALSE		copper resistance D domain-containing protein	2076	691		Stackebrandtia nassauensis LLR-40K-21, DSM 44728		COG3336	S	pfam05425 pfam09678		No	Yes
646685455	6		PANA_2183	FALSE	FALSE	FALSE	FALSE	yebZ	YebZ	636	211		Pantoea ananatis LMG 20103		COG1276	P	pfam05425		No	Yes
646689307	4		Slit_1636	FALSE	FALSE	FALSE	FALSE		conserved hypothetical membrane spanning protein	465	154		Sideroxydans lithotrophicus ES-1		COG5615	S	pfam05425		No	Yes
646691885	14	ctag	Nhal_1243	FALSE	FALSE	FALSE	FALSE		copper resistance D domain protein	1644	547	gAOB	Nitrosococcus halophilus Nc4		COG1276	P	pfam05425		No	Yes
646708899	8		SJA_C1-04850	FALSE	FALSE	FALSE	FALSE	copD	copper resistance protein CopD	933	310		Sphingobium japonicum UT26S		COG1276	P	pfam05425		No	Yes
646728794	10		BMQ_2981	FALSE	FALSE	FALSE	FALSE		hypothetical protein	1050	349		Bacillus megaterium QM B1551		COG1276	P	pfam05425		No	Yes
646733415	8		YPZ3_1935	FALSE	FALSE	FALSE	FALSE		putative copper resistance protein D	885	294		Yersinia pestis Z176003		COG1276	P	pfam05425		No	Yes
646749197	9		Btus_0353	TRUE	FALSE	FALSE	TRUE		copper resistance protein CopC	1698	565		Kyrpidia tusciae T2, DSM 2912		COG2372	R	pfam04234 pfam05425 pfam13115		No	Yes
646754540	8		Cseg_2516	FALSE	FALSE	FALSE	FALSE		copper resistance D domain-containing protein	927	308		Caulobacter segnis ATCC 21756		COG1276	P	pfam05425		No	Yes
646759253	10		BMD_3009	FALSE	FALSE	FALSE	FALSE		hypothetical protein	1050	349		Bacillus megaterium DSM 319		COG1276	P	pfam05425		No	Yes
646763629	8		ECL_A016	FALSE	FALSE	FALSE	FALSE	pcoD	copper resistance protein D	930	309		Enterobacter cloacae cloacae ATCC 13047		COG1276	P	pfam05425		No	Yes
646765421	4		BC1002_0836	FALSE	FALSE	FALSE	FALSE		hypothetical protein	459	152		Burkholderia sp. CCGE1002		COG5615	S	pfam05425		No	Yes
646767154	8		BC1002_2575	FALSE	FALSE	FALSE	FALSE		copper resistance D domain protein	930	309		Burkholderia sp. CCGE1002		COG1276	P	pfam05425		No	Yes
646770096	8		BC1002_5603	FALSE	FALSE	FALSE	FALSE		copper resistance D domain protein	942	313		Burkholderia sp. CCGE1002		COG1276	P	pfam05425		No	Yes
646773064	8		ECL_01456	FALSE	FALSE	FALSE	FALSE		copper resistance D domain-containing protein	870	289		Enterobacter cloacae cloacae ATCC 13047		COG1276	P	pfam05425		No	Yes
646776505	8		ECL_04878	FALSE	FALSE	FALSE	FALSE	pcoD	copper resistant protein PcoD	930	309		Enterobacter cloacae cloacae ATCC 13047		COG1276	P	pfam05425		No	Yes
646784271	3		MCR_0509	FALSE	FALSE	FALSE	FALSE		hypothetical protein	453	150		Moraxella catarrhalis RH4				pfam05425		No	Yes
646796256	16		Cfla_3374	FALSE	TRUE	FALSE	FALSE		Cytochrome c oxidase caa3-type, assembly factor CtaG-related protein	2052	683		Cellulomonas flavigena 134, DSM 20109		COG3336	S	pfam05425 pfam09678		Yes	Yes
646802342	4		Tint_2762	FALSE	FALSE	FALSE	FALSE		hypothetical protein	447	148		Thiomonas intermedia K12		COG5615	S	pfam05425		No	Yes
646806318	8		Tpau_3511	FALSE	FALSE	FALSE	FALSE		copper resistance D domain-containing protein	813	270		Tsukamurella paurometabola 33, DSM 20162				pfam05425		No	Yes
646809819	16		Tbis_1244	FALSE	TRUE	FALSE	FALSE		copper resistance D domain-containing protein	1995	664		Thermobispora bispora R51, DSM 43833		COG3336	S	pfam05425 pfam09678		Yes	Yes
646822268	9		BMB171_C1702	TRUE	FALSE	FALSE	TRUE		copper resistance protein	1635	544		Bacillus thuringiensis BMB171		COG1276	P	pfam04234 pfam05425 pfam13115		Yes	Yes
646836722	16		Ndas_0625	FALSE	TRUE	FALSE	FALSE		Cytochrome c oxidase caa3-type, assembly factor CtaG-related protein	2196	731		Nocardiopsis dassonvillei dassonvillei DSM 43111		COG3336	S	pfam05425 pfam09678		No	Yes
646842566	8		Mesil_0922	FALSE	FALSE	FALSE	FALSE		copper resistance D domain protein	888	295		Meiothermus silvanus VI-R2, DSM 9946		COG1276	P	pfam05425		No	Yes
646856294	7		Trad_0873	FALSE	FALSE	FALSE	FALSE		copper resistance D domain protein	822	273		Truepera radiovictrix RQ-24, DSM 17093		COG1276	P	pfam05425		No	Yes
646864098	8		B21_01799	FALSE	FALSE	FALSE	FALSE	yebZ	Putative copper export protein	873	290		Escherichia coli BL21 (DE3)		COG1276	P	pfam05425		No	Yes
646871040	8		ECSF_1698	FALSE	FALSE	FALSE	FALSE		putative transport protein	873	290		Escherichia coli O150:H5 SE15		COG1276	P	pfam05425		No	Yes
646908492	8		STM14_2279	FALSE	FALSE	FALSE	FALSE		putative inner membrane protein	876	291		Salmonella enterica enterica sv Typhimurium 14028S		COG1276	P	pfam05425		No	Yes
646918340	8		ECD_01811	FALSE	FALSE	FALSE	FALSE	yebZ	predicted inner membrane protein	873	290		Escherichia coli BL21(DE3)		COG1276	P	pfam05425		No	Yes
646925007	8		YPD4_1581	FALSE	FALSE	FALSE	FALSE		putative copper resistance protein D	885	294		Yersinia pestis D106004		COG1276	P	pfam05425		No	Yes
646929273	8		YPD8_1973	FALSE	FALSE	FALSE	FALSE		putative copper resistance protein D	885	294		Yersinia pestis D182038		COG1276	P	pfam05425		No	Yes
646935707	8		EcDH1_1802	FALSE	FALSE	FALSE	FALSE		copper resistance D domain protein	873	290		Escherichia coli K12 DH1, ATCC 33849		COG1276	P	pfam05425		No	Yes
646962510	8		ECOK1_1958	FALSE	FALSE	FALSE	FALSE		copper resistance protein D	873	290		Escherichia coli O18:K1:H7 IHE3034		COG1276	P	pfam05425		No	Yes
646974410	9		SBI_05286	TRUE	FALSE	FALSE	FALSE		putative integral membrane protein	1950	649		Streptomyces bingchenggensis BCW-1		COG2372	R	pfam04234 pfam05425		Yes	Yes
646989251	8		STMMW_18551	FALSE	FALSE	FALSE	FALSE		putative cation transporter	876	291		Salmonella enterica enterica sv Typhimurium D23580		COG1276	P	pfam05425		No	Yes
646997012	8		EC042_2005	FALSE	FALSE	FALSE	FALSE		putative copper resistance protein	873	290		Escherichia coli O44:H18 042 (EAEC)		COG1276	P	pfam05425		No	Yes
647013702	16		SeryN2_010100022857	FALSE	TRUE	FALSE	FALSE		copper resistance transporter	2025	674		Saccharopolyspora erythraea NRRL 2338		COG3336	S	pfam05425 pfam09678		Yes	Yes
647015604	16		SeryN2_010100032488	FALSE	TRUE	FALSE	FALSE		copper resistance transporter	1845	614		Saccharopolyspora erythraea NRRL 2338		COG3336	S	pfam05425 pfam09678		No	Yes
647016165	9		SeryN2_010100035370	FALSE	FALSE	FALSE	FALSE		copper resistance D domain-containing protein	1056	351		Saccharopolyspora erythraea NRRL 2338		COG1276	P	pfam05425		No	Yes
647016444	14		SeryN2_010100036785	FALSE	TRUE	FALSE	FALSE		copper resistance transporter	1905	634		Saccharopolyspora erythraea NRRL 2338		COG3336	S	pfam05425 pfam09678		No	Yes
647024630	4		PaerPAb_010100020671	FALSE	FALSE	FALSE	FALSE		hypothetical protein	465	154		Pseudomonas aeruginosa PAb1		COG5615	S	pfam05425		No	Yes
647025480	4		PaerPAb_010100024864	FALSE	FALSE	FALSE	FALSE		hypothetical protein	435	144		Pseudomonas aeruginosa PAb1				pfam05425		No	Yes
647084644	16		MtubK4_020200000535	FALSE	TRUE	FALSE	FALSE		hypothetical protein	1986	661		Mycobacterium tuberculosis KZN 4207		COG3336	S	pfam05425 pfam09678		No	Yes
647088838	16		MtubKV_020200000550	FALSE	TRUE	FALSE	FALSE		hypothetical protein	1986	661		Mycobacterium tuberculosis KZN V2475		COG3336	S	pfam05425 pfam09678		No	Yes
647096472	4		PsyrpaN_010100018129	FALSE	FALSE	FALSE	FALSE		hypothetical protein	465	154		Pseudomonas syringae pv aesculi NCPPB 3681		COG5615	S	pfam05425		No	Yes
647100494	3		Psyrpa2_010100009602	FALSE	FALSE	FALSE	FALSE		hypothetical protein	465	154		Pseudomonas syringae pv aesculi 2250		COG5615	S	pfam05425		No	Yes
647114380	8		A6013_010100004233	FALSE	FALSE	FALSE	FALSE		copper resistance D	882	293		Acinetobacter baumannii 6013150		COG1276	P	pfam05425		No	Yes
647128592	16		HMPREF0297_0821	FALSE	TRUE	FALSE	FALSE		copper resistance protein D family protein	2289	762		Corynebacterium jeikeium ATCC 43734		COG3336	S	pfam05425 pfam09678		No	Yes
647151933	5		HMPREF0484_2156	FALSE	FALSE	FALSE	FALSE		conserved hypothetical protein	562	186		Klebsiella pneumoniae rhinoscleromatis ATCC 13884				pfam05425		No	Yes
647205889	16		Mtub2_010100000170	FALSE	TRUE	FALSE	FALSE		hypothetical protein	1986	661		Mycobacterium tuberculosis 210		COG3336	S	pfam05425 pfam09678		No	Yes
647265085	8		HMPREF0758_3348	FALSE	FALSE	FALSE	FALSE		copper resistance D	882	293		Serratia odorifera DSM 4582		COG1276	P	pfam05425		No	Yes
647280678	16		HMPREF0569_2045	FALSE	TRUE	FALSE	FALSE		Tat (twin-arginine translocation) pathway signal sequence	2259	752		Micrococcus luteus SK58		COG3336	S	pfam05425 pfam09678		No	Yes
647283351	8		YPD27_0130	FALSE	FALSE	FALSE	FALSE		copper resistance protein D	885	294		Yersinia pestis KIM D27		COG1276	P	pfam05425		No	Yes
647324616	8		SACT1DRAFT_1374	TRUE	FALSE	FALSE	FALSE		copper resistance protein CopC	1947	648		Streptomyces griseus XyelbKG-1 1		COG2372	R	pfam04234 pfam05425		Yes	Yes
647330586	8		SACT1DRAFT_7289	FALSE	FALSE	FALSE	FALSE		copper resistance D domain protein	1050	349		Streptomyces griseus XyelbKG-1 1		COG1276	P	pfam05425		No	Yes
647382214	9		BSU6633_16755	TRUE	FALSE	FALSE	TRUE		copper resistance protein	1626	541		Bacillus subtilis spizizenii ATCC 6633		COG1276	P	pfam04234 pfam05425 pfam13115		Yes	Yes
647462437	8		HMPREF0004_1703	FALSE	FALSE	FALSE	FALSE	copD	copper resistance protein D	927	308		Achromobacter piechaudii ATCC 43553		COG1276	P	pfam05425		No	Yes
647465393	5		HMPREF0004_4635	FALSE	FALSE	FALSE	FALSE		conserved hypothetical protein	570	189		Achromobacter piechaudii ATCC 43553				pfam05425		No	Yes
647465926	4		HMPREF0004_5157	FALSE	FALSE	FALSE	FALSE		integral membrane protein	468	155		Achromobacter piechaudii ATCC 43553		COG5615	S	pfam05425		No	Yes
647467130	8		HMP0015_0598	FALSE	FALSE	FALSE	FALSE	copD	copper resistance D	987	328		Acinetobacter haemolyticus ATCC 19194		COG1276	P	pfam05425		No	Yes
647490352	16		HMPREF0281_01245	FALSE	TRUE	FALSE	FALSE		copper resistance protein D family protein	2067	688		Corynebacterium ammoniagenes DSM 20306		COG3336	S	pfam05425 pfam09678		No	Yes
647490776	16		HMPREF0281_01670	FALSE	TRUE	FALSE	FALSE		ABC transporter, permease protein	2043	680		Corynebacterium ammoniagenes DSM 20306		COG3336	S	pfam05425 pfam09678		No	Yes
647494414	16		HMPREF0183_0621	FALSE	TRUE	FALSE	FALSE		copper resistance protein D family protein	2121	706		Brevibacterium mcbrellneri ATCC 49030		COG3336	S	pfam05425 pfam09678		No	Yes
647501795	16		HMPREF0591_5476	FALSE	TRUE	FALSE	FALSE		ABC superfamily ATP binding cassette transporter	2037	678		Mycobacterium parascrofulaceum ATCC BAA-614		COG3336	S	pfam05425 pfam09678		No	Yes
647504544	16		HMPREF0724_1736	FALSE	TRUE	FALSE	FALSE		copper resistance transporter	2031	676		Rhodococcus equi ATCC 33707		COG3336	S	pfam05425 pfam09678		No	Yes
647506420	9		HMPREF0724_3593	FALSE	FALSE	FALSE	FALSE		copper resistance protein	945	314		Rhodococcus equi ATCC 33707		COG1276	P	pfam05425		No	Yes
647515864	4		GXY_12083	FALSE	FALSE	FALSE	FALSE		putative integral membrane protein	552	183		Gluconacetobacter hansenii ATCC 23769				pfam05425		No	Yes
647545374	8		SCLAV_2838	TRUE	FALSE	FALSE	FALSE		Putative integral membrane protein	2106	701		Streptomyces clavuligerus ATCC 27064		COG2372	R	pfam04234 pfam05425		Yes	Yes
647546934	7		SCLAV_4373	FALSE	FALSE	FALSE	FALSE		Putative membrane protein	1008	335		Streptomyces clavuligerus ATCC 27064		COG1276	P	pfam05425		No	Yes
647573772	8		BBAL3_1077	FALSE	FALSE	FALSE	FALSE		Copper resistance protein D	915	304		Brevundimonas sp. BAL3		COG1276	P	pfam05425		No	Yes
647602639	4		VDG1235_3467	FALSE	FALSE	FALSE	FALSE		hypothetical protein	477	158		Verrucomicrobiales sp. DG1235				pfam05425		No	Yes
647614695	8		RB2083_4148	FALSE	FALSE	FALSE	FALSE		copper resistance D	849	282		Rhodobacterales sp. HTCC2083		COG1276	P	pfam05425		No	Yes
647621500	4		CBGD1_1165	FALSE	FALSE	FALSE	FALSE		conserved hypothetical protein	444	147		Campylobacterales sp. GD 1		COG3399	S	pfam05425		No	Yes
647627268	14	ctag	NOC27_287	FALSE	FALSE	FALSE	FALSE		Copper resistance protein D	1653	550	gAOB	Nitrosococcus oceani AFC27		COG1276	P	pfam05425		No	Yes
647636684	7		RR11_3095	FALSE	FALSE	FALSE	FALSE		copper resistance D	861	286		Nautella italica R11		COG1276	P	pfam05425		No	Yes
647645532	8		RGAI101_1582	FALSE	FALSE	FALSE	FALSE		copper resistance D domain protein	951	316		Sulfitobacter sp. GAI101		COG1276	P	pfam05425		No	Yes
647666542	8		SSKA14_2823	FALSE	FALSE	FALSE	FALSE	copD	probable copper resistance D transmembrane protein	927	308		Stenotrophomonas sp. SKA14		COG1276	P	pfam05425		No	Yes
647671060	8		RKLH11_3604	FALSE	FALSE	FALSE	FALSE		copper resistance D	867	288		Ruegeria sp. KLH11		COG1276	P	pfam05425		No	Yes
647685821	6		MCAG_04125	FALSE	FALSE	FALSE	FALSE		copper resistance protein copC	1065	354		Micromonospora carbonacea var. africana. ATCC 39149		COG1276	P	pfam05425		No	Yes
647689698	3		MDMS009_2293	FALSE	FALSE	FALSE	FALSE		hypothetical protein	324	107		Methylophaga thiooxydans DMS010				pfam05425		No	Yes
647771013	9		POTG_01250	TRUE	FALSE	FALSE	FALSE		copper resistance D domain-containing protein	1710	569		Paenibacillus sp. D14		COG1276	P	pfam04234 pfam05425		Yes	Yes
647937719	8		HMPREF0485_00600	FALSE	FALSE	FALSE	FALSE		copper resistance protein D	870	289		Klebsiella sp. 1_1_55		COG1276	P	pfam05425		No	Yes
647954167	8		ECCG_00360	FALSE	FALSE	FALSE	FALSE		copper resistance protein D	873	290		Escherichia coli B088		COG1276	P	pfam05425		No	Yes
647958578	8		ECDG_01711	FALSE	FALSE	FALSE	FALSE		copper resistance protein D	873	290		Escherichia coli B185		COG1276	P	pfam05425		No	Yes
647964185	8		ECGG_00677	FALSE	FALSE	FALSE	FALSE		copper resistance protein D	873	290		Escherichia coli FVEC1412		COG1276	P	pfam05425		No	Yes
647971369	8		ECEG_01105	FALSE	FALSE	FALSE	FALSE		conserved hypothetical protein	873	290		Escherichia coli B354		COG1276	P	pfam05425		No	Yes
647978433	9		HMPREF0013_02502	FALSE	FALSE	FALSE	FALSE		conserved hypothetical protein	987	328		Acinetobacter sp. SH024		COG1276	P	pfam05425		No	Yes
647981871	8		SSTG_02207	TRUE	FALSE	FALSE	FALSE		copper resistance protein CopC	1821	606		Streptomyces sp. e14		COG2372	R	pfam04234 pfam05425		Yes	Yes
647981923	8		SSTG_02255	TRUE	FALSE	FALSE	FALSE		integral membrane protein	2118	705		Streptomyces sp. e14		COG2372	R	pfam04234 pfam05425		Yes	Yes
648030623	8		ECO26_2678	FALSE	FALSE	FALSE	FALSE	yebZ	putative inner membrane protein	873	290		Escherichia coli O26:H11 11368		COG1276	P	pfam05425		No	Yes
648063209	9		HacjB3_08500	FALSE	FALSE	FALSE	FALSE		hypothetical protein	1191	396		Halalkalicoccus jeotgali B3, DSM 18796		COG1276	P	pfam05425		No	Yes
648063520	4		HacjB3_10000	FALSE	FALSE	FALSE	FALSE		hypothetical protein	465	154		Halalkalicoccus jeotgali B3, DSM 18796				pfam05425		No	Yes
648072012	14	ctag	Nwat_1375	FALSE	FALSE	FALSE	FALSE		copper resistance D domain-containing protein	1644	547	gAOB	Nitrosococcus watsoni C-113		COG1276	P	pfam05425		No	Yes
648073748	9		AMED_0092	FALSE	FALSE	FALSE	FALSE		copper resistance transporter	1029	342		Amycolatopsis mediterranei U32		COG1276	P	pfam05425		No	Yes
648077883	8		AMED_4251	FALSE	FALSE	FALSE	FALSE	pcoC	putative copper resistance protein	909	302		Amycolatopsis mediterranei U32		COG1276	P	pfam05425		No	Yes
648080428	16		AMED_6830	FALSE	TRUE	FALSE	FALSE		putative copper resistance protein D	2010	669		Amycolatopsis mediterranei U32		COG3336	S	pfam05425 pfam09678		No	Yes
648080487	9		AMED_6892	TRUE	FALSE	FALSE	FALSE	pcoC	putative copper resistance protein	1329	442		Amycolatopsis mediterranei U32		COG1276	P	pfam04234 pfam05425		Yes	Yes
648085616	4		Hsero_2669	FALSE	FALSE	FALSE	FALSE		integral membrane protein	450	149		Herbaspirillum seropedicae SmR1		COG5615	S	pfam05425		No	Yes
648093704	16		cpfrc_01632	FALSE	TRUE	FALSE	FALSE		hypothetical protein	2046	681		Corynebacterium pseudotuberculosis FRC41		COG3336	S	pfam05425 pfam09678		No	Yes
648101610	9		BACI_c18960	TRUE	FALSE	FALSE	TRUE		putative copper resistance protein	1644	547		Bacillus anthracis CI		COG1276	P	pfam04234 pfam05425 pfam13115		Yes	Yes
648120125	8		Bresu_1668	FALSE	FALSE	FALSE	FALSE		copper resistance d transmembrane protein	918	305		Brevundimonas subvibrioides ATCC 15264		COG1276	P	pfam05425		No	Yes
648135779	9		Micau_1195	TRUE	FALSE	FALSE	FALSE		copper resistance protein CopC	1668	555		Micromonospora aurantiaca ATCC 27029		COG1276	P	pfam04234 pfam05425		Yes	Yes
648138536	9		Micau_3972	TRUE	FALSE	FALSE	FALSE		copper resistance protein CopC	1542	513		Micromonospora aurantiaca ATCC 27029				pfam04234 pfam05425		Yes	Yes
648157587	8		PB2503_00205	FALSE	FALSE	FALSE	FALSE		hypothetical protein	825	274		Parvularcula bermudensis HTCC2503				pfam05425		No	Yes
648164204	9		BSUW23_02040	TRUE	FALSE	FALSE	TRUE	ycnJ	copper resistance protein	1626	541		Bacillus subtilis spizizenii W23		COG1276	P	pfam04234 pfam05425 pfam13115		Yes	Yes
648168343	9		PPE_00412	TRUE	FALSE	FALSE	FALSE		Uncharacterized protein, Cu resistance protein CopC-like protein	1719	572		Paenibacillus polymyxa E681		COG1276	P	pfam04234 pfam05425		Yes	Yes
648182526	8		Dda3937_00085	FALSE	FALSE	FALSE	FALSE		Copper resistance protein D	879	292		Dickeya dadantii 3937		COG1276	P	pfam05425		No	Yes
648206219	4		BC1003_0991	FALSE	FALSE	FALSE	FALSE		hypothetical protein	459	152		Burkholderia sp. CCGE1003		COG5615	S	pfam05425		No	Yes
648208134	8		BC1003_2892	FALSE	FALSE	FALSE	FALSE		copper resistance D domain-containing protein	930	309		Burkholderia sp. CCGE1003		COG1276	P	pfam05425		No	Yes
648208657	6		BC1003_3407	FALSE	FALSE	FALSE	FALSE		copper resistance D domain-containing protein	942	313		Burkholderia sp. CCGE1003		COG1276	P	pfam05425		No	Yes
648224306	8		Pvag_1648	FALSE	FALSE	FALSE	FALSE	copD	Putative CopD family transporter	876	291		Pantoea vagans C9-1		COG1276	P	pfam05425		No	Yes
648233747	8		ECABU_c21000	FALSE	FALSE	FALSE	FALSE	yebZ	copper resistance protein D	873	290		Escherichia coli ABU 83972		COG1276	P	pfam05425		No	Yes
648238231	16		Cp1002_1627	FALSE	TRUE	FALSE	FALSE	copD	Copper resistance D domain-containing protein/Cytochrome c oxidase caa3 assembly factor (Caa3_CtaG)	2046	681		Corynebacterium pseudotuberculosis 1002		COG3336	S	pfam05425 pfam09678		No	Yes
648240352	16		CpC231_1627	FALSE	TRUE	FALSE	FALSE	copD	Copper resistance D domain-containing protein/Cytochrome c oxidase caa3 assembly factor (Caa3_CtaG)	2046	681		Corynebacterium pseudotuberculosis C231		COG3336	S	pfam05425 pfam09678		No	Yes
648271634	8		UM146_07960	FALSE	FALSE	FALSE	FALSE		inner membrane protein yebZ	873	290		Escherichia coli AIEC UM146		COG1276	P	pfam05425		No	Yes
648278633	4		RB2654_10878	FALSE	FALSE	FALSE	FALSE		hypothetical protein	465	154		Maritimibacter alkaliphilus HTCC2654				pfam05425		No	Yes
648287511	8		R2601_07343	FALSE	FALSE	FALSE	FALSE		hypothetical protein	879	292		Pelagibaca bermudensis HTCC2601		COG1276	P	pfam05425		No	Yes
648324082	16		HMPREF0291_11027	FALSE	TRUE	FALSE	FALSE		copper resistance protein D	2040	679		Corynebacterium genitalium ATCC 33030		COG3336	S	pfam05425 pfam09678		No	Yes
648331373	16		HMPREF0299_7072	FALSE	TRUE	FALSE	FALSE		cytochrome c oxidase Caa3 assembly factor	2001	666		Corynebacterium matruchotii ATCC 14266		COG3336	S	pfam05425 pfam09678		No	Yes
648334309	16		MtubKR_020200000560	FALSE	TRUE	FALSE	FALSE		hypothetical protein	1986	661		Mycobacterium tuberculosis KZN R506		COG3336	S	pfam05425 pfam09678		No	Yes
648341826	8		EcolH7_010100010275	FALSE	FALSE	FALSE	FALSE		inner membrane protein yebZ	873	290		Escherichia coli H736		COG1276	P	pfam05425		No	Yes
648346684	8		EcolM6_010100011647	FALSE	FALSE	FALSE	FALSE		inner membrane protein yebZ	873	290		Escherichia coli M605		COG1276	P	pfam05425		No	Yes
648352282	8		EcolM_010100012082	FALSE	FALSE	FALSE	FALSE		inner membrane protein yebZ	873	290		Escherichia coli M718		COG1276	P	pfam05425		No	Yes
648356788	8		EcolTA_010100008381	FALSE	FALSE	FALSE	FALSE		inner membrane protein yebZ	873	290		Escherichia coli TA206		COG1276	P	pfam05425		No	Yes
648362072	8		EcolT_010100009898	FALSE	FALSE	FALSE	FALSE		inner membrane protein yebZ	873	290		Escherichia coli TA143		COG1276	P	pfam05425		No	Yes
648367083	8		EcolTA2_010100011814	FALSE	FALSE	FALSE	FALSE		inner membrane protein yebZ	873	290		Escherichia coli TA271		COG1276	P	pfam05425		No	Yes
648372270	8		EcolTA28_010100012984	FALSE	FALSE	FALSE	FALSE		inner membrane protein yebZ	873	290		Escherichia coli TA280		COG1276	P	pfam05425		No	Yes
648376898	8		EcolH5_010100009562	FALSE	FALSE	FALSE	FALSE		inner membrane protein yebZ	873	290		Escherichia coli H591		COG1276	P	pfam05425		No	Yes
648382445	8		EcolH2_010100012588	FALSE	FALSE	FALSE	FALSE		inner membrane protein yebZ	873	290		Escherichia coli H299		COG1276	P	pfam05425		No	Yes
648410112	8		PsyrptK_010100013371	FALSE	FALSE	FALSE	FALSE		copper resistance D	936	311		Pseudomonas syringae pv. tomato K40		COG1276	P	pfam05425		No	Yes
648411181	4		PsyrptK_010100018791	FALSE	FALSE	FALSE	FALSE		hypothetical protein	465	154		Pseudomonas syringae pv. tomato K40		COG5615	S	pfam05425		No	Yes
648414912	8		PsyrptM_010100007827	FALSE	FALSE	FALSE	FALSE		copper resistance D	936	311		Pseudomonas syringae pv. tomato Max13		COG1276	P	pfam05425		No	Yes
648416760	4		PsyrptM_010100017085	FALSE	FALSE	FALSE	FALSE		hypothetical protein	465	154		Pseudomonas syringae pv. tomato Max13		COG5615	S	pfam05425		No	Yes
648419716	8		PsyrptN_010100002835	FALSE	FALSE	FALSE	FALSE		copper resistance D	936	311		Pseudomonas syringae pv. tomato NCPPB 1108		COG1276	P	pfam05425		No	Yes
648423116	4		PsyrptN_010100019914	FALSE	FALSE	FALSE	FALSE		hypothetical protein	465	154		Pseudomonas syringae pv. tomato NCPPB 1108		COG5615	S	pfam05425		No	Yes
648427396	4		Psyrps6_010100012846	FALSE	FALSE	FALSE	FALSE		hypothetical protein	465	154		Pseudomonas syringae pv. syringae 642		COG5615	S	pfam05425		No	Yes
648436951	8		AbauAB0_010100014208	FALSE	FALSE	FALSE	FALSE		copper resistance D	882	293		Acinetobacter baumannii AB056		COG1276	P	pfam05425		No	Yes
648441697	16		TMAG_01234	FALSE	TRUE	FALSE	FALSE		conserved membrane protein	1986	661		Mycobacterium tuberculosis SUMu001		COG3336	S	pfam05425 pfam09678		No	Yes
648446180	16		MtubS_010100002820	FALSE	TRUE	FALSE	FALSE		hypothetical protein	1986	661		Mycobacterium tuberculosis SUMu002		COG3336	S	pfam05425 pfam09678		No	Yes
648449994	16		MtubSUM_010100000576	FALSE	TRUE	FALSE	FALSE		hypothetical protein	1986	661		Mycobacterium tuberculosis SUMu003		COG3336	S	pfam05425 pfam09678		No	Yes
648454408	16		MtubSUMu_010100001216	FALSE	TRUE	FALSE	FALSE		hypothetical protein	1986	661		Mycobacterium tuberculosis SUMu004		COG3336	S	pfam05425 pfam09678		No	Yes
648458999	16		MtubSUMu0_010100002800	FALSE	TRUE	FALSE	FALSE		hypothetical protein	1986	661		Mycobacterium tuberculosis SUMu005		COG3336	S	pfam05425 pfam09678		No	Yes
648463107	15		MtubSUMu00_010100002053	FALSE	TRUE	FALSE	FALSE		hypothetical protein	1857	618		Mycobacterium tuberculosis SUMu006		COG3336	S	pfam05425 pfam09678		No	Yes
648467496	16		MtubSUMu007_010100002750	FALSE	TRUE	FALSE	FALSE		hypothetical protein	1986	661		Mycobacterium tuberculosis SUMu007		COG3336	S	pfam05425 pfam09678		No	Yes
648471726	16		MtubSUMu008_010100002790	FALSE	TRUE	FALSE	FALSE		hypothetical protein	1986	661		Mycobacterium tuberculosis SUMu008		COG3336	S	pfam05425 pfam09678		No	Yes
648479494	16		MtubSUMu009_010100020609	FALSE	TRUE	FALSE	FALSE		hypothetical protein	1986	661		Mycobacterium tuberculosis SUMu009		COG3336	S	pfam05425 pfam09678		No	Yes
648483774	16		MtubSUMu01_010100020654	FALSE	TRUE	FALSE	FALSE		hypothetical protein	1986	661		Mycobacterium tuberculosis SUMu010		COG3336	S	pfam05425 pfam09678		No	Yes
648488038	16		MtubSUMu011_010100020954	FALSE	TRUE	FALSE	FALSE		hypothetical protein	1986	661		Mycobacterium tuberculosis SUMu011		COG3336	S	pfam05425 pfam09678		No	Yes
648488325	16		MtubSUMu012_010100000527	FALSE	TRUE	FALSE	FALSE		hypothetical protein	1986	661		Mycobacterium tuberculosis SUMu012		COG3336	S	pfam05425 pfam09678		No	Yes
648523044	8		HMPREF9552_03212	FALSE	FALSE	FALSE	FALSE		copper resistance protein D	873	290		Escherichia coli MS 198-1		COG1276	P	pfam05425		No	Yes
648528334	8		HMPREF9536_02779	FALSE	FALSE	FALSE	FALSE		copper resistance protein D	873	290		Escherichia coli MS 84-1		COG1276	P	pfam05425		No	Yes
648531516	8		HMPREF9540_00132	FALSE	FALSE	FALSE	FALSE		copper resistance protein D	930	309		Escherichia coli MS 115-1		COG1276	P	pfam05425		No	Yes
648532794	8		HMPREF9540_01411	FALSE	FALSE	FALSE	FALSE		copper resistance protein D	873	290		Escherichia coli MS 115-1		COG1276	P	pfam05425		No	Yes
648539541	8		HMPREF9548_03026	FALSE	FALSE	FALSE	FALSE		copper resistance protein D	873	290		Escherichia coli MS 182-1		COG1276	P	pfam05425		No	Yes
648544205	8		HMPREF9543_02258	FALSE	FALSE	FALSE	FALSE		copper resistance protein D	873	290		Escherichia coli MS 146-1		COG1276	P	pfam05425		No	Yes
648552097	8		HMPREF9531_05082	FALSE	FALSE	FALSE	FALSE		copper resistance protein D	873	290		Escherichia coli MS 45-1		COG1276	P	pfam05425		No	Yes
648557411	8		HMPREF9534_05050	FALSE	FALSE	FALSE	FALSE		copper resistance protein D	873	290		Escherichia coli MS 69-1		COG1276	P	pfam05425		No	Yes
648559166	8		HMPREF9550_01213	FALSE	FALSE	FALSE	FALSE		copper resistance protein D	873	290		Escherichia coli MS 187-1		COG1276	P	pfam05425		No	Yes
648566207	8		HMPREF9530_03650	FALSE	FALSE	FALSE	FALSE		copper resistance protein D	873	290		Escherichia coli MS 21-1		COG1276	P	pfam05425		No	Yes
648570871	8		HMPREF9535_02455	FALSE	FALSE	FALSE	FALSE		copper resistance protein D	873	290		Escherichia coli MS 78-1		COG1276	P	pfam05425		No	Yes
648578287	8		HMPREF9541_04769	FALSE	FALSE	FALSE	FALSE		copper resistance protein D	873	290		Escherichia coli MS 116-1		COG1276	P	pfam05425		No	Yes
648581260	8		HMPREF9547_02467	FALSE	FALSE	FALSE	FALSE		copper resistance protein D	873	290		Escherichia coli MS 175-1		COG1276	P	pfam05425		No	Yes
648585812	8		HMPREF9553_02035	FALSE	FALSE	FALSE	FALSE		copper resistance protein D	873	290		Escherichia coli MS 200-1		COG1276	P	pfam05425		No	Yes
648591919	8		HMPREF9551_02698	FALSE	FALSE	FALSE	FALSE		copper resistance protein D	873	290		Escherichia coli MS 196-1		COG1276	P	pfam05425		No	Yes
648599645	8		HMPREF9549_04715	FALSE	FALSE	FALSE	FALSE		copper resistance protein D	873	290		Escherichia coli MS 185-1		COG1276	P	pfam05425		No	Yes
648604518	9		Krac_7870	TRUE	FALSE	FALSE	TRUE		copper resistance protein CopC	1884	627		Ktedonobacter racemifer SOSP1-21, DSM 44963		COG1276	P	pfam04234 pfam05425 pfam13115		Yes	Yes
648604975	9		Krac_8339	TRUE	FALSE	FALSE	TRUE		copper resistance protein CopC	1896	631		Ktedonobacter racemifer SOSP1-21, DSM 44963		COG1276	P	pfam04234 pfam05425 pfam13115		No	Yes
648605156	9		Krac_8525	TRUE	FALSE	FALSE	TRUE		copper resistance protein CopC	2172	723		Ktedonobacter racemifer SOSP1-21, DSM 44963		COG2372	R	pfam04234 pfam05425 pfam13115		Yes	Yes
648619461	4		CTS44_15218	FALSE	FALSE	FALSE	FALSE		hypothetical protein	471	156		Comamonas testosteroni S44		COG5615	S	pfam05425		No	Yes
648621614	8		CTS44_26023	FALSE	FALSE	FALSE	FALSE		copper resistance protein CopD	927	308		Comamonas testosteroni S44		COG1276	P	pfam05425		No	Yes
648621629	8		CTS44_26098	FALSE	FALSE	FALSE	FALSE		copper resistance protein CopD	927	308		Comamonas testosteroni S44		COG1276	P	pfam05425		No	Yes
648633819	8		AfiDRAFT_0897	FALSE	FALSE	FALSE	FALSE		copper resistance D domain protein	927	308		Afipia sp. 1NLS2		COG1276	P	pfam05425		No	Yes
648647352	8		HMPREF9347_03017	FALSE	FALSE	FALSE	FALSE		copper resistance protein D	873	290		Escherichia coli MS 124-1		COG1276	P	pfam05425		No	Yes
648654535	8		HMPREF9346_04088	FALSE	FALSE	FALSE	FALSE		copper resistance protein D	873	290		Escherichia coli MS 119-7		COG1276	P	pfam05425		No	Yes
648657235	8		HMPREF9345_01311	FALSE	FALSE	FALSE	FALSE		copper resistance protein D	873	290		Escherichia coli MS 107-1		COG1276	P	pfam05425		No	Yes
648738024	9		SinmeBDRAFT_2679	TRUE	FALSE	FALSE	FALSE		copper resistance D domain protein	1626	541		Ensifer meliloti BL225C		COG1276	P	pfam04234 pfam05425		No	Yes
648756020	8		StrviDRAFT_7058	TRUE	FALSE	FALSE	FALSE		copper resistance protein CopC	2118	705		Streptomyces violaceusniger Tu 4113		COG2372	R	pfam04234 pfam05425		Yes	Yes
648768248	8		PanABDRAFT_1359	FALSE	FALSE	FALSE	FALSE		copper resistance D domain protein	876	291		Pantoea sp. aB		COG1276	P	pfam05425		No	Yes
648795025	8		R2A130_2602	FALSE	FALSE	FALSE	FALSE		copper resistance D	882	293		Ahrensia sp. R2A130		COG1276	P	pfam05425		No	Yes
648800646	16		HMPREF0277_1962	FALSE	TRUE	FALSE	FALSE		ABC superfamily ATP binding cassette transporter, permease protein	2043	680		Corynebacterium accolens ATCC 49726		COG3336	S	pfam05425 pfam09678		No	Yes
648836623	8		ECNC101_19866	FALSE	FALSE	FALSE	FALSE		inner membrane protein yebZ	873	290		Escherichia coli NC101		COG1276	P	pfam05425		No	Yes
648841702	14	ctag	MettuDRAFT_0450	FALSE	FALSE	FALSE	FALSE		copper resistance D domain protein	1638	545	gMOB	Methylobacter tundripaludum SV96		COG1276	P	pfam05425		No	Yes
648864501	4		SSDG_06568	FALSE	FALSE	FALSE	FALSE		predicted protein	1140	379		Streptomyces pristinaespiralis ATCC 25486				pfam05425		No	Yes
648869926	7		SSEG_05833	FALSE	FALSE	FALSE	FALSE		membrane protein	1008	335		Streptomyces sviceus ATCC 29083		COG1276	P	pfam05425		No	Yes
648871974	9		SSEG_02947	TRUE	FALSE	FALSE	FALSE		transport integral membrane protein	1875	624		Streptomyces sviceus ATCC 29083		COG2372	R	pfam04234 pfam05425		Yes	Yes
648872077	9		SSEG_10968	TRUE	FALSE	FALSE	FALSE		integral membrane protein	1899	632		Streptomyces sviceus ATCC 29083		COG2372	R	pfam04234 pfam05425		Yes	Yes
648880492	4		PSA3335_4254	FALSE	FALSE	FALSE	FALSE		Phosphoribosylcarboxyaminoimidazole (NCAIR) mutase	465	154		Pseudomonas savastanoi pv. savastanoi NCPPB 3335		COG5615	S	pfam05425		No	Yes
648899938	8		ECFG_00689	FALSE	FALSE	FALSE	FALSE		copper resistance protein D	873	290		Escherichia coli FVEC1302		COG1276	P	pfam05425		No	Yes
648920394	15		HMPREF0734_01513	FALSE	TRUE	FALSE	FALSE		copper resistance protein D family protein	2169	722		Rothia dentocariosa M567		COG3336	S	pfam05425 pfam09678		No	Yes
649589664	2		RCOM_2100200	FALSE	FALSE	FALSE	FALSE		hypothetical protein	693	230		Ricinus communis Hale				pfam05425		No	Yes
649634820	4		PFLU1323	FALSE	FALSE	FALSE	FALSE		hypothetical protein	465	154		Pseudomonas fluorescens SBW25		COG5615	S	pfam05425		No	Yes
649637372	8		PFLU3947	FALSE	FALSE	FALSE	FALSE		putative copper resistance protein D	858	285		Pseudomonas fluorescens SBW25		COG1276	P	pfam05425		No	Yes
649643976	8		XNC1_1920	FALSE	FALSE	FALSE	FALSE	yebZ	putative resistance protein	999	332		Xenorhabdus nematophila ATCC 19061		COG1276	P	pfam05425		No	Yes
649651162	8		EbC_24850	FALSE	FALSE	FALSE	FALSE		Putative opper resistance D protein	864	287		Erwinia billingiae Eb661		COG1276	P	pfam05425		No	Yes
649662027	4		NIDE3927	FALSE	FALSE	FALSE	FALSE		hypothetical protein	474	157		Candidatus Nitrospira defluvii				pfam05425		No	Yes
649665171	16		AARI_25710	FALSE	TRUE	FALSE	FALSE		putative copper resistance protein D	2055	684		Arthrobacter arilaitensis re117, CIP 108037		COG3336	S	pfam05425 pfam09678		No	Yes
649666425	9		BAMF_0363	TRUE	FALSE	FALSE	TRUE	ycnJ	Copper resistance protein D	1629	542		Bacillus amyloliquefaciens Campbell F, DSM 7		COG1276	P	pfam04234 pfam05425 pfam13115		Yes	Yes
649676560	8		Entcl_1949	FALSE	FALSE	FALSE	FALSE		putative resistance protein	870	289		Enterobacter cloacae SCF1		COG1276	P	pfam05425		No	Yes
649679840	9		PPSC2_c0443	TRUE	FALSE	FALSE	FALSE		copper resistance protein copc	1719	572		Paenibacillus polymyxa SC2		COG1276	P	pfam04234 pfam05425		Yes	Yes
649710539	9		BATR1942_20685	TRUE	FALSE	FALSE	TRUE		copper resistance protein	1635	544		Bacillus atrophaeus 1942		COG1276	P	pfam04234 pfam05425 pfam13115		Yes	Yes
649711767	8		AXYL_01129	FALSE	FALSE	FALSE	FALSE		copper resistance protein D	927	308		Achromobacter xylosoxidans A8		COG1276	P	pfam05425		No	Yes
649715895	4		AXYL_05258	FALSE	FALSE	FALSE	FALSE		integral membrane protein 4	468	155		Achromobacter xylosoxidans A8		COG5615	S	pfam05425		No	Yes
649718849	15		HMPREF0733_11292	FALSE	TRUE	FALSE	FALSE		copper resistance protein D family protein	2169	722		Rothia dentocariosa ATCC 17931		COG3336	S	pfam05425 pfam09678		No	Yes
649739024	9		REQ_01180	FALSE	FALSE	FALSE	FALSE		copper transporter	945	314		Rhodococcus equi 103S		COG1276	P	pfam05425		No	Yes
649741837	16		REQ_30380	FALSE	TRUE	FALSE	FALSE		integral membrane protein	2031	676		Rhodococcus equi 103S		COG3336	S	pfam05425 pfam09678		No	Yes
649748965	9		FraEuI1c_1869	FALSE	FALSE	FALSE	FALSE		copper resistance D domain protein	1233	410		Frankia sp. EuI1c		COG1276	P	pfam05425		No	Yes
649751781	16		FraEuI1c_4733	FALSE	TRUE	FALSE	FALSE		cytochrome C oxidase caa3-type, assembly factor CtaG-related protein	2304	767		Frankia sp. EuI1c		COG3336	S	pfam05425 pfam09678		No	Yes
649754150	9		FraEuI1c_7109	TRUE	FALSE	FALSE	FALSE		copper resistance protein CopC	1992	663		Frankia sp. EuI1c		COG2372	R	pfam04234 pfam05425		Yes	Yes
649769476	3		Hbor_21750	FALSE	FALSE	FALSE	FALSE		copper resistance protein d	459	152		Halogeometricum borinquense PR3, DSM 11551				pfam05425		No	Yes
649800291	6		PSM_A2647	FALSE	FALSE	FALSE	FALSE		copper export protein	720	239		Pseudoalteromonas sp. SM9913		COG1276	P	pfam05425		No	Yes
649806911	16		Mspyr1_19960	FALSE	TRUE	FALSE	FALSE		hypothetical protein	2031	676		Mycobacterium gilvum Spyr1		COG3336	S	pfam05425 pfam09678		No	Yes
649809880	9		Mspyr1_50610	FALSE	FALSE	FALSE	FALSE		copper export protein	924	307		Mycobacterium gilvum Spyr1		COG1276	P	pfam05425		Yes	Yes
649811623	9		ML5_1460	TRUE	FALSE	FALSE	FALSE		copper resistance protein copc	1668	555		Micromonospora sp. L5		COG1276	P	pfam04234 pfam05425		Yes	Yes
649814406	8		ML5_4245	TRUE	FALSE	FALSE	FALSE		copper resistance protein copc	1509	502		Micromonospora sp. L5				pfam04234 pfam05425		Yes	Yes
649814586	9		ML5_4449	TRUE	FALSE	FALSE	FALSE		copper resistance protein copc	1542	513		Micromonospora sp. L5				pfam04234 pfam05425		Yes	Yes
649817411	8		Astex_1047	FALSE	FALSE	FALSE	FALSE		hypothetical protein	1260	419		Asticcacaulis excentricus CB 48		COG2847	S	pfam04314 pfam05425		No	Yes
649828322	16		Intca_0263	FALSE	TRUE	FALSE	FALSE		Cytochrome c oxidase caa3-type, assembly factor CtaG-related protein	2037	678		Intrasporangium calvum 7KIP, DSM 43043		COG3336	S	pfam05425 pfam09678		Yes	Yes
649833102	4		Tmar_1395	FALSE	FALSE	FALSE	FALSE		hypothetical protein	468	155		Thermaerobacter marianensis 7p75a, DSM 12885				pfam05425		No	Yes
649833212	4		Tmar_1507	FALSE	FALSE	FALSE	FALSE		copper resistance D	483	160		Thermaerobacter marianensis 7p75a, DSM 12885		COG5615	S	pfam05425		No	Yes
649839874	9		Rpdx1_2574	TRUE	FALSE	FALSE	FALSE		copper resistance protein CopC	1599	532		Rhodopseudomonas palustris DX-1		COG1276	P	pfam04234 pfam05425		No	Yes
649847234	8		Pat9b_2286	FALSE	FALSE	FALSE	FALSE		copper resistance D domain-containing protein	882	293		Pantoea sp. At-9b		COG1276	P	pfam05425		No	Yes
649856792	4		Alide_1895	FALSE	FALSE	FALSE	FALSE		hypothetical protein	567	188		Alicycliphilus denitrificans BC		COG5615	S	pfam05425		No	Yes
649858129	3		Alide_3233	FALSE	FALSE	FALSE	FALSE		hypothetical protein	441	146		Alicycliphilus denitrificans BC				pfam05425		No	Yes
649871569	9		Mesci_1691	TRUE	FALSE	FALSE	FALSE		copper resistance protein CopC	1638	545		Mesorhizobium ciceri bv biserrulae WSM1271		COG1276	P	pfam04234 pfam05425		No	Yes
649883366	4		Varpa_0135	FALSE	FALSE	FALSE	FALSE		hypothetical protein	459	152		Variovorax paradoxus EPS		COG5615	S	pfam05425		No	Yes
649904096	4		ANT_03880	FALSE	FALSE	FALSE	FALSE		hypothetical protein	516	171		Anaerolinea thermophila UNI-1		COG5615	S	pfam05425		No	Yes
649928505	5		GM18_0298	FALSE	FALSE	FALSE	FALSE		cytochrome b5	915	304		Geobacter sp. M18		COG4892	R	pfam05425		Yes	Yes
649937995	9		BSn5_13580	TRUE	FALSE	FALSE	TRUE		copper resistance protein	1626	541		Bacillus subtilis BSn5		COG1276	P	pfam04234 pfam05425 pfam13115		Yes	Yes
649945100	8		Rahaq_2882	FALSE	FALSE	FALSE	FALSE		copper resistance D domain-containing protein	885	294		Rahnella sp. Y9602		COG1276	P	pfam05425		No	Yes
649954278	4		BC1001_0919	FALSE	FALSE	FALSE	FALSE		hypothetical protein	459	152		Burkholderia sp. CCGE1001		COG5615	S	pfam05425		No	Yes
649956314	8		BC1001_2953	FALSE	FALSE	FALSE	FALSE		copper resistance D domain-containing protein	930	309		Burkholderia sp. CCGE1001		COG1276	P	pfam05425		No	Yes
649963934	8		Deipr_0940	FALSE	FALSE	FALSE	FALSE		copper resistance D domain-containing protein	783	260		Deinococcus proteolyticus MRP, DSM 20540		COG1276	P	pfam05425		No	Yes
650023053	8		HMPREF1004_04506	FALSE	FALSE	FALSE	FALSE		copper resistance protein D	930	309		Ralstonia sp. 5_7_47FAA		COG1276	P	pfam05425		No	Yes
650023101	8		HMPREF1004_04555	FALSE	FALSE	FALSE	FALSE		copper resistance protein D	930	309		Ralstonia sp. 5_7_47FAA		COG1276	P	pfam05425		No	Yes
650034055	8		HMPREF1012_04019	TRUE	FALSE	FALSE	TRUE		YcnJ protein	1647	548		Bacillus sp. BT1B_CT2		COG1276	P	pfam04234 pfam05425 pfam13115		Yes	Yes
650039286	10		HMPREF1013_04730	FALSE	FALSE	FALSE	FALSE		hypothetical protein	1095	364		Bacillus sp. 2_A_57_CT2		COG1276	P	pfam05425		No	Yes
650067586	10		PVOR_14889	FALSE	FALSE	FALSE	FALSE		copper resistance D domain protein	1089	362		Paenibacillus vortex V453		COG1276	P	pfam05425		No	Yes
650093569	2		PseP1_010100021729	FALSE	FALSE	FALSE	FALSE		hypothetical protein	234	77		Pseudonocardia sp. P1				pfam05425		No	Yes
650096260	8		EC182770_0356	FALSE	FALSE	FALSE	FALSE		copper resistance D family protein	873	290		Escherichia coli 1827-70		COG1276	P	pfam05425		No	Yes
650103574	8		EC236275_2860	FALSE	FALSE	FALSE	FALSE		copper resistance D family protein	873	290		Escherichia coli 2362-75		COG1276	P	pfam05425		No	Yes
650111800	8		SD1617_5741	FALSE	FALSE	FALSE	FALSE		copper resistance D family protein	873	290		Shigella dysenteriae 1617		COG1276	P	pfam05425		No	Yes
650116708	8		HMPREF9348_01403	FALSE	FALSE	FALSE	FALSE		copper resistance protein D	873	290		Escherichia coli MS 145-7		COG1276	P	pfam05425		No	Yes
650122404	7		SSA3_010100007288	FALSE	FALSE	FALSE	FALSE		membrane protein	978	325		Streptomyces sp. SA3_actG		COG1276	P	pfam05425		No	Yes
650126028	8		SSA3_010100025541	TRUE	FALSE	FALSE	FALSE		hypothetical protein	1932	643		Streptomyces sp. SA3_actG		COG2372	R	pfam04234 pfam05425		Yes	Yes
650136025	8		PL1_2849	TRUE	FALSE	FALSE	FALSE		copper importer-like protein	1689	562		Paenibacillus larvae larvae B-3650		COG1276	P	pfam04234 pfam05425		No	Yes
650141430	4		PFWH6_1342	FALSE	FALSE	FALSE	FALSE		hypothetical protein	465	154		Pseudomonas fluorescens WH6		COG5615	S	pfam05425		No	Yes
650143793	8		PFWH6_3726	FALSE	FALSE	FALSE	FALSE		putative copper resistance protein D	858	285		Pseudomonas fluorescens WH6		COG1276	P	pfam05425		No	Yes
650144353	8		PFWH6_4284	FALSE	FALSE	FALSE	FALSE	copD	Copper resistance protein D	882	293		Pseudomonas fluorescens WH6		COG1276	P	pfam05425		No	Yes
650199682	4		PA39016_000130032	FALSE	FALSE	FALSE	FALSE		hypothetical protein	465	154		Pseudomonas aeruginosa 39016		COG5615	S	pfam05425		No	Yes
650200892	4		PA39016_000910010	FALSE	FALSE	FALSE	FALSE		hypothetical protein	435	144		Pseudomonas aeruginosa 39016				pfam05425		No	Yes
650201230	8		PA39016_001030057	FALSE	FALSE	FALSE	FALSE		hypothetical protein	927	308		Pseudomonas aeruginosa 39016		COG1276	P	pfam05425		No	Yes
650226826	9		HMPREF0321_1083	FALSE	FALSE	FALSE	FALSE		copper resistance protein D	1191	396		Dermacoccus sp. Ellin185		COG1276	P	pfam05425		No	Yes
650228066	15		HMPREF0321_2571	FALSE	TRUE	FALSE	FALSE		cytochrome c oxidase Caa3 assembly factor	2181	726		Dermacoccus sp. Ellin185		COG3336	S	pfam05425 pfam09678		No	Yes
650235684	16		ES5_01669	FALSE	TRUE	FALSE	FALSE		integral membrane protein	2031	676		Dietzia cinnamea P4		COG3336	S	pfam05425 pfam09678		No	Yes
650379279	9		BSNT_00693	TRUE	FALSE	FALSE	TRUE	ycnJ	hypothetical protein	1626	541		Bacillus subtilis natto BEST195		COG1276	P	pfam04234 pfam05425 pfam13115		Yes	Yes
650396357	8		YPC_2493	FALSE	FALSE	FALSE	FALSE		putative copper resistance protein D	885	294		Yersinia pestis Medievalis Harbin 35		COG1276	P	pfam05425		No	Yes
650400555	8		NRG857_09215	FALSE	FALSE	FALSE	FALSE		hypothetical protein	873	290		Escherichia coli O83:H1 NRG 857C		COG1276	P	pfam05425		No	Yes
650410029	4		HP15_851	FALSE	FALSE	FALSE	FALSE		integral membrane protein-like protein	456	151		Marinobacter adhaerens HP15, DSM 23420		COG5615	S	pfam05425		No	Yes
650428157	8		ECW_m2013	FALSE	FALSE	FALSE	FALSE	yebZ	predicted inner membrane protein	873	290		Escherichia coli W, ATCC 9637		COG1276	P	pfam05425		No	Yes
650434887	4		Hydth_1715	FALSE	FALSE	FALSE	FALSE		protein of unknown function DUF474	453	150		Hydrogenobacter thermophilus TK-6, DSM 6534				pfam05425		No	Yes
650437925	16		CpI19_1634	FALSE	TRUE	FALSE	FALSE	copD	Copper resistance D domain-containing protein/Cytochrome c oxidase caa3 assembly factor (Caa3_CtaG)	2046	681		Corynebacterium pseudotuberculosis I19		COG3336	S	pfam05425 pfam09678		No	Yes
650443903	4		PPUBIRD1_1170	FALSE	FALSE	FALSE	FALSE		Hypothetical protein, conserved	465	154		Pseudomonas putida BIRD-1		COG5615	S	pfam05425		No	Yes
650468331	16		Asphe3_37510	FALSE	TRUE	FALSE	FALSE		putative membrane protein	2184	727		Arthrobacter phenanthrenivorans Sphe3		COG3336	S	pfam05425 pfam09678		No	Yes
650468661	16		Asphe3_41060	FALSE	TRUE	FALSE	FALSE		putative membrane protein	2076	691		Arthrobacter phenanthrenivorans Sphe3		COG3336	S	pfam05425 pfam09678		No	Yes
650490236	8		STM474_1906	FALSE	FALSE	FALSE	FALSE		putative inner membrane protein	876	291		Salmonella enterica enterica sv Typhimurium 4/74		COG1276	P	pfam05425		No	Yes
650498500	9		YBT020_09935	TRUE	FALSE	FALSE	TRUE		copper resistance protein	1644	547		Bacillus thuringiensis sv. finitimus YBT-020		COG1276	P	pfam04234 pfam05425 pfam13115		Yes	Yes
650513951	9		lmo4a_2111	TRUE	FALSE	FALSE	FALSE		copper export protein, putative	1626	541		Listeria monocytogenes 4a L99		COG1276	P	pfam04234 pfam05425		Yes	Yes
650541267	8		ENC_06540	FALSE	FALSE	FALSE	FALSE		Putative copper export protein	870	289		Enterobacter cloacae cloacae NCTC 9394		COG1276	P	pfam05425		No	Yes
650543518	8		ENC_35370	FALSE	FALSE	FALSE	FALSE		Putative copper export protein	930	309		Enterobacter cloacae cloacae NCTC 9394		COG1276	P	pfam05425		No	Yes
650722360	6		RBRH_02412	FALSE	FALSE	FALSE	FALSE		hypothetical protein	1023	340		Burkholderia rhizoxinica HKI 454				pfam05425		No	Yes
650723492	4		RBRH_01372	FALSE	FALSE	FALSE	FALSE		hypothetical protein	456	151		Burkholderia rhizoxinica HKI 454		COG5615	S	pfam05425		No	Yes
650730417	16		MTES_1690	FALSE	TRUE	FALSE	FALSE		hypothetical protein	1995	664		Microbacterium testaceum StLB037		COG3336	S	pfam05425 pfam09678		No	Yes
650744621	8		ACMV_26290	FALSE	FALSE	FALSE	FALSE		putative copper resistance protein	936	311		Acidiphilium multivorum AIU301		COG1276	P	pfam05425		No	Yes
650753380	10		NAL212_0803	FALSE	FALSE	TRUE	FALSE		copper resistance D domain-containing protein	2010	669	bAOB	Nitrosomonas sp. AL212		COG1276	P	pfam00578 pfam05425 pfam13442		No	Yes
650754413	10		NAL212_1916	FALSE	FALSE	TRUE	FALSE		copper resistance D domain-containing protein	2019	672	bAOB	Nitrosomonas sp. AL212		COG1276	P	pfam05425 pfam13442		No	Yes
650758162	8		YE105_C2376	FALSE	FALSE	FALSE	FALSE		putative copper resistance protein D	885	294		Yersinia enterocolitica palearctica 105.5R(r) (O:9)		COG1276	P	pfam05425		No	Yes
650773138	4		bgla_2g05310	FALSE	FALSE	FALSE	FALSE		copper resistance protein D	522	173		Burkholderia gladioli BSR3				pfam05425		No	Yes
650777000	4		PSEBR_a1167	FALSE	FALSE	FALSE	FALSE		hypothetical protein	465	154		Pseudomonas brassicacearum brassicacearum NFM421		COG5615	S	pfam05425		No	Yes
650780530	7		PSEBR_a4429	FALSE	FALSE	FALSE	FALSE		copper resistance protein	912	303		Pseudomonas brassicacearum brassicacearum NFM421		COG1276	P	pfam05425		No	Yes
650786411	4		bgla_1g30390	FALSE	FALSE	FALSE	FALSE		hypothetical protein	459	152		Burkholderia gladioli BSR3		COG5615	S	pfam05425		No	Yes
650786757	8		bgla_1g33890	FALSE	FALSE	FALSE	FALSE		Copper resistance D	939	312		Burkholderia gladioli BSR3		COG1276	P	pfam05425		No	Yes
650792901	4		MDS_1481	FALSE	FALSE	FALSE	FALSE		hypothetical protein	465	154		Pseudomonas mendocina NK-01		COG5615	S	pfam05425		No	Yes
650800833	3		Alide2_1214	FALSE	FALSE	FALSE	FALSE		copper resistance D domain-containing protein	441	146		Alicycliphilus denitrificans K601				pfam05425		No	Yes
650801694	4		Alide2_2093	FALSE	FALSE	FALSE	FALSE		hypothetical protein	561	186		Alicycliphilus denitrificans K601		COG5615	S	pfam05425		No	Yes
650815566	9		VAB18032_10540	TRUE	FALSE	FALSE	FALSE		copper resistance protein CopC	1656	551		Verrucosispora maris AB-18-032		COG1276	P	pfam04234 pfam05425		Yes	Yes
650819607	9		VAB18032_00760	TRUE	FALSE	FALSE	FALSE		copper resistance protein CopC	1656	551		Verrucosispora maris AB-18-032		COG1276	P	pfam04234 pfam05425		Yes	Yes
650839527	8		Glaag_4448	FALSE	FALSE	FALSE	FALSE		putative copper export protein	900	299		Glaciecola agarilytica 4H-3-7+YE-5		COG1276	P	pfam05425		No	Yes
650839595	8		Glaag_4518	FALSE	FALSE	FALSE	FALSE		putative copper export protein	915	304		Glaciecola agarilytica 4H-3-7+YE-5		COG1276	P	pfam05425		No	Yes
650863517	9		AS9A_0047	FALSE	FALSE	FALSE	FALSE		copper resistance protein	969	322		Amycolicicoccus subflavus DQS3-9A1		COG1276	P	pfam05425		No	Yes
650864542	16		AS9A_1058	FALSE	TRUE	FALSE	FALSE		copper resistance transporter	2073	690		Amycolicicoccus subflavus DQS3-9A1		COG3336	S	pfam05425 pfam09678		No	Yes
650866548	9		AS9A_3056	TRUE	FALSE	FALSE	FALSE		hypothetical protein	1641	546		Amycolicicoccus subflavus DQS3-9A1		COG1276	P	pfam04234 pfam05425		No	Yes
650874267	16		JDM601_1426	FALSE	TRUE	FALSE	FALSE		ABC transporter permease	2010	669		Mycobacterium sp. JDM601		COG3336	S	pfam05425 pfam09678		Yes	Yes
650886787	7		PP1Y_AT24202	FALSE	FALSE	FALSE	FALSE		copper resistance D	885	294		Novosphingobium sp. PP1Y		COG1276	P	pfam05425		No	Yes
650888433	6		PP1Y_Mpl4190	FALSE	FALSE	FALSE	FALSE		copper resistance D	663	220		Novosphingobium sp. PP1Y		COG1276	P	pfam05425		No	Yes
650897124	9		Sinme_5871	TRUE	FALSE	FALSE	FALSE		copper resistance protein CopC	1626	541		Ensifer meliloti AK83, DSM 23913		COG1276	P	pfam04234 pfam05425		No	Yes
650916084	16		MLP_46280	FALSE	TRUE	FALSE	FALSE		hypothetical protein	2058	685		Microlunatus phosphovorus NM-1		COG3336	S	pfam05425 pfam09678		No	Yes
650916709	16		MLP_52500	FALSE	TRUE	FALSE	FALSE		hypothetical protein	2016	671		Microlunatus phosphovorus NM-1		COG3336	S	pfam05425 pfam09678		Yes	Yes
650931204	8		EAE_22760	FALSE	FALSE	FALSE	FALSE		putative copper resistance protein D	870	289		Enterobacter aerogenes KCTC 2190		COG1276	P	pfam05425		No	Yes
650932384	16		CRES_0612	FALSE	TRUE	FALSE	FALSE		hypothetical protein	2214	737		Corynebacterium resistens DSM 45100		COG3336	S	pfam05425 pfam09678		No	Yes
650945682	16		CULC22_01783	FALSE	TRUE	FALSE	FALSE		hypothetical protein	2046	681		Corynebacterium ulcerans BR-AD22		COG3336	S	pfam05425 pfam09678		No	Yes
650960800	9		KNP414_06849	TRUE	FALSE	FALSE	FALSE	ycnJ	YcnJ	1659	552		Paenibacillus mucilaginosus KNP414		COG2372	R	pfam04234 pfam05425		Yes	Yes
650990350	8		CNE_2c21670	FALSE	FALSE	FALSE	FALSE		hypothetical protein	933	310		Cupriavidus necator N-1, ATCC 43291		COG1276	P	pfam05425		No	Yes
650994284	4		CNE_1c24010	FALSE	FALSE	FALSE	FALSE		hypothetical protein	507	168		Cupriavidus necator N-1, ATCC 43291		COG5615	S	pfam05425		No	Yes
651004236	10		Nit79A3_2897	FALSE	FALSE	TRUE	FALSE		copper resistance D domain-containing protein	2022	673	bAOB	Nitrosomonas sp. IS79A3		COG1276	P	pfam05425 pfam13442		No	Yes
651004863	10		Nit79A3_3551	FALSE	FALSE	TRUE	FALSE		copper resistance D domain-containing protein	2022	673	bAOB	Nitrosomonas sp. IS79A3		COG1276	P	pfam00578 pfam05425 pfam13442		No	Yes
651009042	4		PPS_4137	FALSE	FALSE	FALSE	FALSE		hypothetical protein	465	154		Pseudomonas putida S16		COG5615	S	pfam05425		No	Yes
651018966	4		PSTAB_0839	FALSE	FALSE	FALSE	FALSE		putative copper export protein	435	144		Pseudomonas stutzeri Lautrop AB 201, ATCC 17588				pfam05425		No	Yes
651019558	4		PSTAB_1426	FALSE	FALSE	FALSE	FALSE		integral membrane protein	465	154		Pseudomonas stutzeri Lautrop AB 201, ATCC 17588		COG5615	S	pfam05425		No	Yes
651023613	16		MAF_01030	FALSE	TRUE	FALSE	FALSE		putative conserved integral membrane protein	1986	661		Mycobacterium africanum GM041182		COG3336	S	pfam05425 pfam09678		No	Yes
651032583	8		SBG_1711	FALSE	FALSE	FALSE	FALSE		putative cation transporter	876	291		Salmonella bongori NCTC 12419		COG1276	P	pfam05425		No	Yes
651037452	16		MCAN_01051	FALSE	TRUE	FALSE	FALSE		putative integral membrane protein	1986	661		Mycobacterium canettii CIPT 140010059		COG3336	S	pfam05425 pfam09678		No	Yes
651063731	8		STMDT12_C18980	FALSE	FALSE	FALSE	FALSE		putative cation transporter	876	291		Salmonella enterica enterica sv Typhimurium T000240		COG1276	P	pfam05425		No	Yes
651068609	8		ECDH1ME8569_1786	FALSE	FALSE	FALSE	FALSE	yebZ	copper resistance D domain-containing protein	873	290		Escherichia coli DH1 (ME8569)		COG1276	P	pfam05425		No	Yes
651072713	6		PAJ_1497	FALSE	FALSE	FALSE	FALSE	yebZ	inner membrane protein YebZ	828	275		Pantoea ananatis AJ13355		COG1276	P	pfam05425		No	Yes
651082953	16		CCDC5079_0090	FALSE	TRUE	FALSE	FALSE		integral membrane protein	1923	640		Mycobacterium tuberculosis CCDC5079		COG3336	S	pfam05425 pfam09678		Yes	Yes
651086648	16		CCDC5180_0090	FALSE	TRUE	FALSE	FALSE		integral membrane protein	1923	640		Mycobacterium tuberculosis CCDC5180		COG3336	S	pfam05425 pfam09678		Yes	Yes
651095016	8		SM11_pC0976	TRUE	FALSE	FALSE	FALSE		Copper binding protein	1569	522		Ensifer meliloti SM11		COG1276	P	pfam04234 pfam05425		Yes	Yes
651102640	9		CT43_CH1777	TRUE	FALSE	FALSE	TRUE		copper resistance protein	1650	549		Bacillus thuringiensis sv chinensis CT-43		COG1276	P	pfam04234 pfam05425 pfam13115		Yes	Yes
651152318	9		Psed_0137	FALSE	FALSE	FALSE	FALSE		copper resistance D domain protein	981	326		Pseudonocardia dioxanivorans CB1190		COG1276	P	pfam05425		No	Yes
651156904	16		Psed_4809	FALSE	TRUE	FALSE	FALSE		Cytochrome c oxidase caa3-type, assembly factor CtaG-related protein	2181	726		Pseudonocardia dioxanivorans CB1190		COG3336	S	pfam05425 pfam09678		No	Yes
651164538	8		STMUK_1854	FALSE	FALSE	FALSE	FALSE		putative inner membrane protein	876	291		Salmonella enterica enterica sv Typhimurium UK-1		COG1276	P	pfam05425		No	Yes
651174775	4		PSTAA_0906	FALSE	FALSE	FALSE	FALSE		putative copper export protein	435	144		Pseudomonas stutzeri CMT.A.9, DSM 4166				pfam05425		No	Yes
651175414	4		PSTAA_1545	FALSE	FALSE	FALSE	FALSE		integral membrane protein	465	154		Pseudomonas stutzeri CMT.A.9, DSM 4166		COG5615	S	pfam05425		No	Yes
651178626	9		BAMTA208_01840	TRUE	FALSE	FALSE	TRUE	ycnJ	copper resistance protein	1629	542		Bacillus amyloliquefaciens TA208		COG1276	P	pfam04234 pfam05425 pfam13115		Yes	Yes
651182815	9		LL3_00378	TRUE	FALSE	FALSE	TRUE	ycnJ	Copper resistance protein D	1629	542		Bacillus amyloliquefaciens LL3		COG1276	P	pfam04234 pfam05425 pfam13115		Yes	Yes
651191413	4		BPTD_2076	FALSE	FALSE	FALSE	FALSE		hypothetical protein	447	148		Bordetella pertussis CS		COG3399	S	pfam05425		No	Yes
651192165	4		BPTD_2886	FALSE	FALSE	FALSE	FALSE		hypothetical protein	453	150		Bordetella pertussis CS		COG5615	S	pfam05425		No	Yes
651203594	16		CULC809_01704	FALSE	TRUE	FALSE	FALSE		putative membrane protein	2046	681		Corynebacterium ulcerans 809		COG3336	S	pfam05425 pfam09678		No	Yes
651208061	8		ECNA114_1887	FALSE	FALSE	FALSE	FALSE	yebZ	hypothetical protein	873	290		Escherichia coli NA114		COG1276	P	pfam05425		No	Yes
651226121	9		LMM7_2150	TRUE	FALSE	FALSE	FALSE	yebZ	putative copper export protein	1626	541		Listeria monocytogenes M7		COG1276	P	pfam04234 pfam05425		Yes	Yes
651230806	8		RSPO_m00424	FALSE	FALSE	FALSE	FALSE	copD	copper resistance protein d	930	309		Ralstonia solanacearum Po82		COG1276	P	pfam05425		No	Yes
651232579	8		OCA4_c05180	FALSE	FALSE	FALSE	FALSE		putative copper resistance protein D	936	311		Oligotropha carboxidovorans OM4		COG1276	P	pfam05425		No	Yes
651235552	8		OCA4_pOC167B00280	FALSE	FALSE	FALSE	FALSE		putative copper resistance protein D	936	311		Oligotropha carboxidovorans OM4		COG1276	P	pfam05425		No	Yes
651239973	8		UMNF18_2296	FALSE	FALSE	FALSE	FALSE		copper resistance protein D family protein	873	290		Escherichia coli UMNF18		COG1276	P	pfam05425		No	Yes
651246423	8		KPN2242_14765	FALSE	FALSE	FALSE	FALSE		putative copper resistance protein D	870	289		Klebsiella pneumoniae KCTC 2242		COG1276	P	pfam05425		No	Yes
651248568	7		KPN2242_25491	FALSE	FALSE	FALSE	FALSE		copper resistance protein D	780	259		Klebsiella pneumoniae KCTC 2242		COG1276	P	pfam05425		No	Yes
651252276	8		LF82_2937	FALSE	FALSE	FALSE	FALSE	yebZ	Inner membrane protein yebZ	873	290		Escherichia coli LF82		COG1276	P	pfam05425		No	Yes
651258163	4		THI_3310	FALSE	FALSE	FALSE	FALSE		Putative copper export protein	447	148		Thiomonas arsenitoxydans 3As		COG5615	S	pfam05425		No	Yes
651262935	8		Y11_06521	FALSE	FALSE	FALSE	FALSE		copper resistance protein D	885	294		Yersinia enterocolitica palearctica sv O:3/4 Y11		COG1276	P	pfam05425		No	Yes
651288297	8		STTU_3298	TRUE	FALSE	FALSE	FALSE		putative copper resistance protein CopC	1953	650		Streptomyces sp. Tu6071		COG2372	R	pfam04234 pfam05425		Yes	Yes
651290533	7		STTU_5534	FALSE	FALSE	FALSE	FALSE		hypothetical protein	978	325		Streptomyces sp. Tu6071		COG1276	P	pfam05425		No	Yes
651315712	2		ABI_01060	FALSE	FALSE	FALSE	FALSE		putative membrane protein	228	75		Asticcacaulis biprosthecum C19, ATCC 27554				pfam05425		No	Yes
651321747	8		BDIM_13860	FALSE	FALSE	FALSE	FALSE		copper resistance protein D	927	308		Brevundimonas diminuta ATCC 11568		COG1276	P	pfam05425		No	Yes
651321789	8		BDIM_14280	FALSE	FALSE	FALSE	FALSE		copper resistance protein D	906	301		Brevundimonas diminuta ATCC 11568		COG1276	P	pfam05425		No	Yes
651396586	5		PH505_du00010	FALSE	FALSE	FALSE	FALSE		copper resistance protein D	546	181		Pseudoalteromonas haloplanktis ANT/505				pfam05425		No	Yes
651398658	9		NBCG_01933	TRUE	FALSE	FALSE	FALSE		LigA	1704	567	acUOB	Nocardioidaceae bacterium Broad-1		COG1276	P	pfam04234 pfam05425		No	Yes
651399625	16		NBCG_02911	FALSE	TRUE	FALSE	FALSE		copper resistance protein D family protein	2013	670	acUOB	Nocardioidaceae bacterium Broad-1		COG3336	S	pfam05425 pfam09678		No	Yes
651399690	8		NBCG_02977	TRUE	FALSE	FALSE	FALSE		putative membrane protein	1944	647	acUOB	Nocardioidaceae bacterium Broad-1		COG1276	P	pfam04234 pfam05425		No	Yes
651401395	9		NBCG_04709	FALSE	FALSE	FALSE	FALSE		ABC-type transporter	1008	335	acUOB	Nocardioidaceae bacterium Broad-1		COG1276	P	pfam05425		No	Yes
651404988	8		SclaA2_010100012726	TRUE	FALSE	FALSE	FALSE		putative integral membrane protein	2106	701		Streptomyces clavuligerus ATCC 27064		COG2372	R	pfam04234 pfam05425		Yes	Yes
651406652	7		SclaA2_010100020953	FALSE	FALSE	FALSE	FALSE		hypothetical protein	1008	335		Streptomyces clavuligerus ATCC 27064		COG1276	P	pfam05425		No	Yes
651419353	10		Nlim_1405	TRUE	FALSE	FALSE	FALSE		copper resistance D domain-containing protein	2787	928	arAOB	Candidatus Nitrosoarchaeum limnia SFB1		COG4257	V	pfam04234 pfam05425		Yes	Yes
651419406	4		Nlim_1458	FALSE	FALSE	FALSE	FALSE		hypothetical protein	498	165	arAOB	Candidatus Nitrosoarchaeum limnia SFB1		COG5615	S	pfam05425		No	Yes
651441532	16		CbovD2_010100010552	FALSE	TRUE	FALSE	FALSE		hypothetical protein	2202	734		Corynebacterium bovis Evans, DSM 20582		COG3336	S	pfam05425 pfam09678		No	Yes
651458414	8		XVE_3818	FALSE	FALSE	FALSE	FALSE	copD	Copper resistance protein D	930	309		Xanthomonas vesicatoria Maraite, ATCC 35937		COG1276	P	pfam05425		No	Yes
651472398	16		SCNU_07688	FALSE	TRUE	FALSE	FALSE		cytochrome c oxidase caa3-type, assembly factor CtaG-like protein	2070	689		Gordonia neofelifaecis NRRL B-59395		COG3336	S	pfam05425 pfam09678		Yes	Yes
651473187	9		SCNU_11645	FALSE	FALSE	FALSE	FALSE		copper resistance D domain protein	1152	383		Gordonia neofelifaecis NRRL B-59395		COG1276	P	pfam05425		No	Yes
651473802	9		SCNU_14721	FALSE	FALSE	FALSE	FALSE		copper resistance D domain-containing protein	909	302		Gordonia neofelifaecis NRRL B-59395				pfam05425		Yes	Yes
651512670	10		HMPREF9412_0645	FALSE	FALSE	FALSE	FALSE		copper resistance protein D	1089	362		Paenibacillus sp. HGF5		COG1276	P	pfam05425		No	Yes
651525344	8		SGM_3597	TRUE	FALSE	FALSE	FALSE		copper-binding protein	2412	803		Streptomyces griseoaurantiacus M045		COG2372	R	pfam04234 pfam05425		No	Yes
651525405	9		SGM_3654	TRUE	FALSE	FALSE	FALSE		copper-binding protein	1983	660		Streptomyces griseoaurantiacus M045		COG2372	R	pfam04234 pfam05425		Yes	Yes
651547479	8		HMPREF9538_01240	FALSE	FALSE	FALSE	FALSE		copper resistance protein D	930	309		Klebsiella sp. MS 92-3		COG1276	P	pfam05425		No	Yes
651547837	8		HMPREF9538_01599	FALSE	FALSE	FALSE	FALSE		copper resistance protein D	870	289		Klebsiella sp. MS 92-3		COG1276	P	pfam05425		No	Yes
651558825	9		CathTA2_0186	TRUE	FALSE	FALSE	FALSE		copper resistance protein CopC	1950	649		Caldalkalibacillus thermarum TA2.A1		COG1276	P	pfam04234 pfam05425		No	Yes
651560157	10		CathTA2_1536	FALSE	FALSE	FALSE	FALSE		copper resistance D domain protein	1161	386		Caldalkalibacillus thermarum TA2.A1		COG1276	P	pfam05425		No	Yes
651563825	4		SXCC_01986	FALSE	FALSE	FALSE	FALSE		Inner membrane protein yebZ	486	161		Gluconacetobacter sp. SXCC-1				pfam05425		No	Yes
651571803	9		HMPREF9413_4025	TRUE	FALSE	FALSE	FALSE		copper resistance protein CopC	1653	550		Paenibacillus sp. HGF7		COG2372	R	pfam04234 pfam05425		Yes	Yes
651584742	8		SUS17_3278	FALSE	FALSE	FALSE	FALSE		copper resistance D family protein	945	314		Sphingomonas sp. S17		COG1276	P	pfam05425		No	Yes
651585341	8		SUS17_3881	FALSE	FALSE	FALSE	FALSE		copper resistance D family protein	927	308		Sphingomonas sp. S17		COG1276	P	pfam05425		No	Yes
651586777	4		METUNv1_01274	FALSE	FALSE	FALSE	FALSE		Conserved hypothetical protein; Putative membrane protein	468	155		Methyloversatilis universalis FAM5		COG5615	S	pfam05425		No	Yes
651588592	8		METUNv1_03127	FALSE	FALSE	FALSE	FALSE		Putative copper resistance D transmembrane protein, CopD	927	308		Methyloversatilis universalis FAM5		COG1276	P	pfam05425		No	Yes
651600881	8		HMPREF9086_2256	FALSE	FALSE	FALSE	FALSE	copD	copper resistance protein D	930	309		Enterobacter hormaechei ATCC 49162		COG1276	P	pfam05425		No	Yes
651601418	8		HMPREF9086_2787	FALSE	FALSE	FALSE	FALSE	yebZ	inner membrane protein YebZ	870	289		Enterobacter hormaechei ATCC 49162		COG1276	P	pfam05425		No	Yes
651610205	4		HMPREF9373_0578	FALSE	FALSE	FALSE	FALSE		hypothetical protein	441	146		Psychrobacter sp. 1501				pfam05425		No	Yes
651613187	4		MAMP_01837	FALSE	FALSE	FALSE	FALSE		putative integral membrane protein	468	155		Methylophaga aminisulfidivorans MP, KCTC 12909		COG5615	S	pfam05425		No	Yes
651614086	4		MAMP_02721	FALSE	FALSE	FALSE	FALSE		hypothetical protein	444	147		Methylophaga aminisulfidivorans MP, KCTC 12909				pfam05425		No	Yes
651658329	8		SOHN41_01749	FALSE	FALSE	FALSE	FALSE		copper export protein	897	298		Shewanella sp. HN-41		COG1276	P	pfam05425		No	Yes
651664004	8		APM_3414	FALSE	FALSE	FALSE	FALSE		hypothetical protein	921	306		Acidiphilium sp. PM, DSM 24941		COG1276	P	pfam05425		No	Yes
651666436	9		MY1_1770	TRUE	FALSE	FALSE	FALSE		Copper resistance D domain protein	2787	928	arAOB	Candidatus Nitrosoarchaeum koreensis MY1		COG1276	P	pfam04234 pfam05425		Yes	Yes
651666493	4		MY1_1827	FALSE	FALSE	FALSE	FALSE		Copper export protein	498	165	arAOB	Candidatus Nitrosoarchaeum koreensis MY1		COG5615	S	pfam05425		No	Yes
2143740971	4		GAL35imgmDRAFT_00008300	FALSE	FALSE	FALSE	FALSE		Copper resistance protein D.	507	168		Thermoflexus hugenholtzii JAD2 (Draft Genome)				pfam05425		No	Yes
2230704389	6		Rhi57DRAFT_00049700	FALSE	FALSE	FALSE	FALSE		Putative copper export protein	879	292		Rhizobium sp. 57MFTsu3.2		COG1276	P	pfam05425		No	Yes
2230705253	9		Rhi57DRAFT_00058340	TRUE	FALSE	FALSE	FALSE		Uncharacterized protein, homolog of Cu resistance protein CopC	1599	532		Rhizobium sp. 57MFTsu3.2		COG2372	R	pfam04234 pfam05425		Yes	Yes
2230708482	4		PseKD5DRAFT_00026890	FALSE	FALSE	FALSE	FALSE		Predicted integral membrane protein	465	154		Pseudomonas sp. KD5		COG5615	S	pfam05425		No	Yes
2230709762	8		PseKD5DRAFT_00039730	FALSE	FALSE	FALSE	FALSE		Putative copper export protein	924	307		Pseudomonas sp. KD5		COG1276	P	pfam05425		No	Yes
2230711165	8		PseKD5DRAFT_00053780	FALSE	FALSE	FALSE	FALSE		Putative copper export protein	846	281		Pseudomonas sp. KD5		COG1276	P	pfam05425		No	Yes
2236277047	8		A536G10DRAFT_00020040	FALSE	FALSE	FALSE	FALSE		Putative copper export protein	876	291		alpha proteobacterium SCGC AAA536-G10		COG1276	P	pfam05425		No	Yes
2236277920	8		A536K22DRAFT_00005380	FALSE	FALSE	FALSE	FALSE		Putative copper export protein	876	291		alpha proteobacterium SCGC AAA536-K22		COG1276	P	pfam05425		No	Yes
2236438670	8		A76C3DRAFT_00003910	FALSE	FALSE	FALSE	FALSE		Putative copper export protein	849	282		alpha proteobacterium SCGC AAA076-C03		COG1276	P	pfam05425		No	Yes
2236663163	15		A027J17DRAFT_00004290	FALSE	TRUE	FALSE	FALSE		Predicted membrane protein	1785	594		actinobacterium SCGC AAA027-J17		COG3336	S	pfam05425 pfam09678		No	Yes
2236664242	15		A27M14DRAFT_00004120	FALSE	TRUE	FALSE	FALSE		Predicted membrane protein	1893	630		actinobacterium SCGC AAA027-M14		COG3336	S	pfam05425 pfam09678		No	Yes
2236665164	14		A28A23DRAFT_00004720	FALSE	TRUE	FALSE	FALSE		Predicted membrane protein	1527	508		actinobacterium SCGC AAA028-A23		COG3336	S	pfam05425 pfam09678		No	Yes
2236666403	15		A44N4DRAFT_00007990	FALSE	TRUE	FALSE	FALSE		Predicted membrane protein	1848	615		actinobacterium SCGC AAA044-N04		COG3336	S	pfam05425 pfam09678		No	Yes
2236668574	12		A278O22DRAFT_00005900	FALSE	TRUE	FALSE	FALSE		Predicted membrane protein	1413	470		actinobacterium SCGC AAA278-O22				pfam05425 pfam09678		No	Yes
2236670933	7		A023D18DRAFT_00007370	FALSE	FALSE	FALSE	FALSE		Putative copper export protein	768	256		actinobacterium SCGC AAA023-D18		COG1276	P	pfam05425		No	Yes
2246769252	15		AB141P3DRAFT_00047	FALSE	TRUE	FALSE	FALSE		Predicted membrane protein	1785	594		actinobacterium SCGC AB141-P03		COG3336	S	pfam05425 pfam09678		No	Yes
2264898624	10		A3KODRAFT_01482	TRUE	FALSE	FALSE	FALSE		Putative copper export protein	2859	952	arAOB	Marine Group I crenarchaeon SCGC AB-629-I23		COG1276	P	pfam04234 pfam05425		Yes	Yes
2264959078	4		A471M6DRAFT_01015	FALSE	FALSE	FALSE	FALSE		Predicted integral membrane protein	483	160		Calescamantes bacterium SCGC AAA471-M6 (GBS-N_001_25)		COG5615	S	pfam05425		No	Yes
2264961778	4		J0000106I5DRAFT_00275	FALSE	FALSE	FALSE	FALSE		Predicted integral membrane protein	483	160		Calescamantes bacterium JGI 0000106-I5 (GBS-C_001_287)		COG5615	S	pfam05425		No	Yes
2264964186	4		J0000106N5DRAFT_00394	FALSE	FALSE	FALSE	FALSE		Predicted integral membrane protein	483	160		Calescamantes bacterium JGI 0000106-N5 (GBS-C_001_291)		COG5615	S	pfam05425		No	Yes
2264964739	4		J00000106N7DRAFT_00339	FALSE	FALSE	FALSE	FALSE		Predicted integral membrane protein	483	160		Calescamantes bacterium JGI 0000106-N7 (GBS-C_001_292)		COG5615	S	pfam05425		No	Yes
2265139626	4		or0609	FALSE	FALSE	FALSE	FALSE		Predicted integral membrane protein	504	167		Candidatus Poribacteria sp. WGA-4E (final_clean_version)		COG5615	S	pfam05425		No	Yes
2265146283	4		POR3G_03741	FALSE	FALSE	FALSE	FALSE		Predicted integral membrane protein	507	168		Poribacteria bacterium WGA-3G (final_clean_version)				pfam05425		No	Yes
2500865672	2		scaf_01880	FALSE	FALSE	FALSE	FALSE		Putative copper export protein	201	66		Chlamydomonas reinhardtii				pfam05425		No	Yes
2501074230	8		BPVA5_49680	FALSE	FALSE	FALSE	FALSE		Putative copper export protein	927	308		Burkholderia sp. PVA5		COG1276	P	pfam05425		No	Yes
2501075877	4		BPVA5_66150	FALSE	FALSE	FALSE	FALSE		Predicted integral membrane protein	459	152		Burkholderia sp. PVA5		COG5615	S	pfam05425		No	Yes
2501081446	4		BMTI641T_47210	FALSE	FALSE	FALSE	FALSE		Predicted integral membrane protein	459	152		Burkholderia unamae MTI-641		COG5615	S	pfam05425		No	Yes
2501081675	8		BMTI641T_49510	FALSE	FALSE	FALSE	FALSE		Putative copper export protein	927	308		Burkholderia unamae MTI-641		COG1276	P	pfam05425		No	Yes
2501407998	8		BSRMRH20_11720	FALSE	FALSE	FALSE	FALSE		Putative copper export protein	927	308		Burkholderia sp. SRMrh-20		COG1276	P	pfam05425		No	Yes
2501411218	4		BSRMRH20_43940	FALSE	FALSE	FALSE	FALSE		Predicted integral membrane protein	459	152		Burkholderia sp. SRMrh-20		COG5615	S	pfam05425		No	Yes
2501715914	8		CMT41_3845	FALSE	FALSE	FALSE	FALSE		copper resistance D domain protein	879	292		Colwellia sp. MT41		COG1276	P	pfam05425		No	Yes
2501721243	8		KT99_2583	FALSE	FALSE	FALSE	FALSE		copper resistance D	981	326		Shewanella benthica KT99		COG1276	P	pfam05425		No	Yes
2501735521	4		P3TCK_4901	FALSE	FALSE	FALSE	FALSE		Copper resistance protein D	444	147		Photobacterium profundum 3TCK				pfam05425		No	Yes
2501809732	4		PADW1_00740	FALSE	FALSE	FALSE	FALSE		Predicted integral membrane protein	465	154		Pseudomonas aeruginosa DoWo1		COG5615	S	pfam05425		No	Yes
2501810940	4		PADW1_12820	FALSE	FALSE	FALSE	FALSE		hypothetical protein	435	144		Pseudomonas aeruginosa DoWo1				pfam05425		No	Yes
2501812637	8		PADW1_29820	FALSE	FALSE	FALSE	FALSE		Putative copper export protein	927	308		Pseudomonas aeruginosa DoWo1		COG1276	P	pfam05425		No	Yes
2501847336	4		p707DRAFT_10320	FALSE	FALSE	FALSE	FALSE		Predicted integral membrane protein	465	154		Pseudomonas aeruginosa PAP7		COG5615	S	pfam05425		No	Yes
2501849067	8		p707DRAFT_27560	FALSE	FALSE	FALSE	FALSE		Putative copper export protein	927	308		Pseudomonas aeruginosa PAP7		COG1276	P	pfam05425		No	Yes
2501851229	4		p707DRAFT_48900	FALSE	FALSE	FALSE	FALSE		hypothetical protein	435	144		Pseudomonas aeruginosa PAP7				pfam05425		No	Yes
2501855997	8		XANTHO5DRAFT_37430	FALSE	FALSE	FALSE	FALSE		Putative copper export protein	930	309		Xanthomonas sp. 5		COG1276	P	pfam05425		No	Yes
2501895062	4		ClimDRAFT_18100	FALSE	FALSE	FALSE	FALSE		hypothetical protein	438	145		Chlorobaculum limnaeum DSM 1677				pfam05425		No	Yes
2501902898	4		orh_00870	FALSE	FALSE	FALSE	FALSE		hypothetical protein	435	144		Ornithobacterium rhinotracheale				pfam05425		No	Yes
2501941254	8		MicromonoL516690	TRUE	FALSE	FALSE	FALSE		Putative copper export protein	1509	502		Micromonospora L5				pfam04234 pfam05425		Yes	Yes
2501941985	9		MicromonoL524010	TRUE	FALSE	FALSE	FALSE		Putative copper export protein	1668	555		Micromonospora L5		COG1276	P	pfam04234 pfam05425		No	Yes
2501943741	9		MicromonoL541650	TRUE	FALSE	FALSE	FALSE		Putative copper export protein	1542	513		Micromonospora L5				pfam04234 pfam05425		No	Yes
2502332908	4		PHBDraft_05810	FALSE	FALSE	FALSE	FALSE		Predicted integral membrane protein	459	152		Chromatiales bacterium		COG5615	S	pfam05425		No	Yes
2502671219	8		A1_00150	TRUE	FALSE	FALSE	FALSE		Putative copper export protein	1194	397	arAOB	Candidatus Nitrosopumilus sp. BD31 (assembly_A1_100119)		COG1276	P	pfam04234 pfam05425		Yes	Yes
2502671280	4		A1_00760	FALSE	FALSE	FALSE	FALSE		Predicted integral membrane protein	498	165	arAOB	Candidatus Nitrosopumilus sp. BD31 (assembly_A1_100119)		COG5615	S	pfam05425		No	Yes
2502832991	3		WTB_Feb10_08230	FALSE	FALSE	FALSE	FALSE		Copper resistance protein D.	405	134		Pseudomonas aeruginosa				pfam05425		No	Yes
2502833027	4		WTB_Feb10_08650	FALSE	FALSE	FALSE	FALSE		Predicted integral membrane protein	465	154		Pseudomonas aeruginosa		COG5615	S	pfam05425		No	Yes
2502834430	8		WTB_Feb10_22660	FALSE	FALSE	FALSE	FALSE		Putative copper export protein	927	308		Pseudomonas aeruginosa		COG1276	P	pfam05425		No	Yes
2502842183	4		BOGUAY_2352	FALSE	FALSE	FALSE	FALSE		Predicted integral membrane protein	474	157		Beggiatoa sp. Orange Guaymas		COG5615	S	pfam05425		No	Yes
2502910752	8		rn_15650	TRUE	FALSE	FALSE	FALSE		Uncharacterized protein, homolog of Cu resistance protein CopC	2115	704		Streptomyces clavuligerus ATCC 27064 (pseudochromosome_reference_new)		COG2372	R	pfam04234 pfam05425		Yes	Yes
2502912338	6		rn_31270	FALSE	FALSE	FALSE	FALSE		Putative copper export protein	885	294		Streptomyces clavuligerus ATCC 27064 (pseudochromosome_reference_new)		COG1276	P	pfam05425		No	Yes
2503199759	9		Mesop_1734	TRUE	FALSE	FALSE	FALSE		copper resistance protein CopC	1605	534		Mesorhizobium opportunistum WSM2075 (final version from ORNL)		COG1276	P	pfam04234 pfam05425		Yes	Yes
2503255035	9		T81_Chloro_DRAFT_00005750	TRUE	FALSE	FALSE	TRUE		Uncharacterized protein, homolog of Cu resistance protein CopC	2010	669		Chloroflexi bacterium T81		COG2372	R	pfam04234 pfam05425 pfam13115		No	Yes
2503258255	9		T81_Chloro_DRAFT_00038040	TRUE	FALSE	FALSE	FALSE		Uncharacterized protein, homolog of Cu resistance protein CopC	2022	673		Chloroflexi bacterium T81		COG2372	R	pfam04234 pfam05425		No	Yes
2503281109	9		bcoa_00018320	TRUE	FALSE	FALSE	TRUE		Putative copper export protein	1647	548		Bacillus coagulans 36D1, ATCC PTA-5827 (Bacillus coagulans 36D1 UF finished)		COG1276	P	pfam04234 pfam05425 pfam13115		Yes	Yes
2503367859	4		Cyast_2434	FALSE	FALSE	FALSE	FALSE		Copper resistance protein D	447	148		Cyanobacterium stanieri PCC 7202				pfam05425		No	Yes
2503568850	8		b1840	FALSE	FALSE	FALSE	FALSE		predicted inner membrane protein	873	290		Escherichia coli K		COG1276	P	pfam05425		No	Yes
2503639746	4		tkp2_00011300	FALSE	FALSE	FALSE	FALSE		Predicted integral membrane protein	489	162		Thiomicrospira sp. KP2		COG5615	S	pfam05425		No	Yes
2503651098	4		PF-R124_00012170	FALSE	FALSE	FALSE	FALSE		Predicted integral membrane protein	465	154		Pseudomonas fluorescens R124		COG5615	S	pfam05425		No	Yes
2503652062	8		PF-R124_00021810	FALSE	FALSE	FALSE	FALSE		Putative copper export protein	858	285		Pseudomonas fluorescens R124		COG1276	P	pfam05425		No	Yes
2503662033	9		bcer_00025170	TRUE	FALSE	FALSE	TRUE		Putative copper export protein	1635	544		Bacillus cereus RCH_BC1 (Abyss contigs Sep '10)		COG1276	P	pfam04234 pfam05425 pfam13115		Yes	Yes
2503665783	9		bcer_00008990	TRUE	FALSE	FALSE	TRUE		Putative copper export protein	1635	544		Bacillus cereus RCH_BC3 (Abyss contigs Sep '10)		COG1276	P	pfam04234 pfam05425 pfam13115		Yes	Yes
2503671687	9		bcer_00012390	TRUE	FALSE	FALSE	TRUE		Putative copper export protein	1635	544		Bacillus cereus RCH_BC2 (Abyss contigs Sep '10)		COG1276	P	pfam04234 pfam05425 pfam13115		Yes	Yes
2503747509	4		Cyan10605_3231	FALSE	FALSE	FALSE	FALSE		Copper resistance protein D	447	148		Cyanobacterium aponinum PCC 10605				pfam05425		No	Yes
2503809426	8		BSes73_00014940	TRUE	FALSE	FALSE	TRUE		Putative copper export protein	1626	541		Bacillus subtilis ES73 (11072010 Assembly)		COG1276	P	pfam04234 pfam05425 pfam13115		Yes	No
2503861754	16		TCel_TB100_00007200	FALSE	TRUE	FALSE	FALSE		Predicted membrane protein	1989	662		Thermobifida cellulosilytica TB100		COG3336	S	pfam05425 pfam09678		No	Yes
2503914406	9		BsimplexDRAFT_00026380	TRUE	FALSE	FALSE	TRUE		Putative copper export protein	1635	544		Bacillus simplex II3b11 (Draft1, status 17.November 2010)		COG1276	P	pfam04234 pfam05425 pfam13115		Yes	Yes
2503916051	10		BsimplexDRAFT_00042870	FALSE	FALSE	FALSE	FALSE		Putative copper export protein	1080	359		Bacillus simplex II3b11 (Draft1, status 17.November 2010)		COG1276	P	pfam05425		No	Yes
2503965226	8		Schlor_00042050	FALSE	FALSE	FALSE	FALSE		Putative copper export protein	945	314		Sphingobium chlorophenolicum L-1		COG1276	P	pfam05425		No	Yes
2504551621	8		AMB_00014410	FALSE	FALSE	FALSE	FALSE		Putative copper export protein	927	308		Alteromonas taeanensis SN2		COG1276	P	pfam05425		No	Yes
2504663241	16		Rhol_00013690	FALSE	TRUE	FALSE	FALSE		Predicted membrane protein	1989	662		Candidatus Rhodoluna lacicola MWH-Ta8		COG3336	S	pfam05425 pfam09678		No	Yes
2504679837	4		Pse7367_1407	FALSE	FALSE	FALSE	FALSE		Copper resistance protein D	447	148		Pseudanabaena sp. PCC 7367				pfam05425		No	Yes
2504720034	8		Pfl_HK44_00010270	FALSE	FALSE	FALSE	FALSE		Putative copper export protein	879	292		Pseudomonas fluorescens HK44 (Draft 1)		COG1276	P	pfam05425		No	Yes
2504722137	4		Pfl_HK44_00031330	FALSE	FALSE	FALSE	FALSE		Predicted integral membrane protein	465	154		Pseudomonas fluorescens HK44 (Draft 1)		COG5615	S	pfam05425		No	Yes
2504808827	8		Rm45A6_00009410	FALSE	FALSE	FALSE	FALSE		Putative copper export protein	879	292		Ruegeria mobilis 45A6		COG1276	P	pfam05425		No	Yes
2504820149	8		RosLE17_00002430	FALSE	FALSE	FALSE	FALSE		Putative copper export protein	879	292		Roseobacter sp. LE17 (first submission)		COG1276	P	pfam05425		No	Yes
2504908392	8		CATT_00019490	TRUE	FALSE	FALSE	FALSE		Uncharacterized protein, homolog of Cu resistance protein CopC	1866	621		Streptomyces cattleya ATCC 35852 (S. cattleya - VELVET and IMAGE assembly)		COG2372	R	pfam04234 pfam05425		Yes	Yes
2504913403	7		CATT_00069690	TRUE	FALSE	FALSE	FALSE		Uncharacterized protein, homolog of Cu resistance protein CopC	1977	658		Streptomyces cattleya ATCC 35852 (S. cattleya - VELVET and IMAGE assembly)		COG2372	R	pfam04234 pfam05425		No	Yes
2504959661	13		Metme_00005190	FALSE	FALSE	FALSE	FALSE		Putative copper export protein	1632	543	gMOB	Methylomonas methanica MC09		COG1276	P	pfam05425		No	Yes
2504978728	16		IsoJ5_00019430	FALSE	TRUE	FALSE	FALSE		Predicted membrane protein	2070	689		Isoptericola variabilis J5		COG3336	S	pfam05425 pfam09678		No	Yes
2504990074	8		PseW53_00061440	TRUE	FALSE	FALSE	FALSE		Uncharacterized protein, homolog of Cu resistance protein CopC	1914	637		Streptomyces sp. HrubLS-53		COG2372	R	pfam04234 pfam05425		Yes	Yes
2505092281	8		seerub_00046760	FALSE	FALSE	FALSE	FALSE		Putative copper export protein	876	291		Salmonella enterica enterica Rubislaw		COG1276	P	pfam05425		No	Yes
2505096867	8		seehvt_00042770	FALSE	FALSE	FALSE	FALSE		Putative copper export protein	876	291		Salmonella enterica enterica sv Hvittingfoss A4-620		COG1276	P	pfam05425		No	Yes
2505113186	8		seemzo_00047190	FALSE	FALSE	FALSE	FALSE		Putative copper export protein	876	291		Salmonella enterica enterica MZ0080		COG1276	P	pfam05425		No	Yes
2505178031	8		PflaDRAFT_00029000	FALSE	FALSE	FALSE	FALSE		Putative copper export protein	888	295		Pseudoalteromonas flavipulchra 2ta6 (Draft assembly 1)		COG1276	P	pfam05425		No	Yes
2505180398	8		TW2DRAFT_00004450	FALSE	FALSE	FALSE	FALSE		Putative copper export protein	888	295		Pseudoalteromonas sp. Tw-2 (Draft assembly 1)		COG1276	P	pfam05425		No	Yes
2505291136	7		arA4DRAFT_00035950	FALSE	FALSE	FALSE	FALSE		Putative copper export protein	831	276		Agrobacterium rhizogenes A4 (version 3)		COG1276	P	pfam05425		No	Yes
2505325199	4		PaeATCC142_0286.00000060	FALSE	FALSE	FALSE	FALSE		Putative copper export protein	435	144		Pseudomonas aeruginosa AMC, ATCC 142				pfam05425		No	Yes
2505325724	4		PaeATCC142_0392.00000150	FALSE	FALSE	FALSE	FALSE		Predicted integral membrane protein	465	154		Pseudomonas aeruginosa AMC, ATCC 142		COG5615	S	pfam05425		No	Yes
2505349353	4		PaeATCC8709_0266.00000430	FALSE	FALSE	FALSE	FALSE		Predicted integral membrane protein	465	154		Pseudomonas aeruginosa AMC 25-A-2, ATCC 8709		COG5615	S	pfam05425		No	Yes
2505350981	4		PaeATCC8709_0370.00000170	FALSE	FALSE	FALSE	FALSE		Putative copper export protein	435	144		Pseudomonas aeruginosa AMC 25-A-2, ATCC 8709				pfam05425		No	Yes
2505351381	8		PaeATCC8709_0477.00000170	FALSE	FALSE	FALSE	FALSE		Putative copper export protein	927	308		Pseudomonas aeruginosa AMC 25-A-2, ATCC 8709		COG1276	P	pfam05425		No	Yes
2505400432	4		Pci0788_9_0040.00001590	FALSE	FALSE	FALSE	FALSE		Predicted integral membrane protein	465	154		Pseudomonas syringae Pci0788_9		COG5615	S	pfam05425		No	Yes
2505482964	4		PgyBR1_0036.00000320	FALSE	FALSE	FALSE	FALSE		Predicted integral membrane protein	465	154		Pseudomonas syringae PgyBR1 (Psy13)		COG5615	S	pfam05425		No	Yes
2505489604	4		PgyUnB647_0037.00000320	FALSE	FALSE	FALSE	FALSE		Predicted integral membrane protein	465	154		Pseudomonas syringae PgyUnB647 (Psy14)		COG5615	S	pfam05425		No	Yes
2505494356	4		PgyLN10_0033.00000320	FALSE	FALSE	FALSE	FALSE		Predicted integral membrane protein	465	154		Pseudomonas syringae PgyLN10 (Psy15)		COG5615	S	pfam05425		No	Yes
2505503002	4		PgyKN44_0053.00000320	FALSE	FALSE	FALSE	FALSE		Predicted integral membrane protein	465	154		Pseudomonas syringae PgyKN44 (Psy16)		COG5615	S	pfam05425		No	Yes
2505508691	4		PlaYM7902_0041.00000400	FALSE	FALSE	FALSE	FALSE		Predicted integral membrane protein	465	154		Pseudomonas syringae PlaYM7902 (Psy27)		COG5615	S	pfam05425		No	Yes
2505509988	8		PlaYM7902_0059.00000360	FALSE	FALSE	FALSE	FALSE		Putative copper export protein	939	312		Pseudomonas syringae PlaYM7902 (Psy27)		COG1276	P	pfam05425		No	Yes
2505511843	4		Pla107_0024.00001560	FALSE	FALSE	FALSE	FALSE		Predicted integral membrane protein	465	154		Pseudomonas syringae Pla107 (Psy30)		COG5615	S	pfam05425		No	Yes
2505521487	4		PmaES4326_0055.00001340	FALSE	FALSE	FALSE	FALSE		Predicted integral membrane protein	465	154		Pseudomonas syringae PmaES4326 (Psy34)		COG5615	S	pfam05425		No	Yes
2505527193	4		PmaH7608_0307.00000040	FALSE	FALSE	FALSE	FALSE		Predicted integral membrane protein	465	154		Pseudomonas syringae PmaH7608 (Psy39)		COG5615	S	pfam05425		No	Yes
2505533676	4		PmaYM7930_0048.00000550	FALSE	FALSE	FALSE	FALSE		Predicted integral membrane protein	465	154		Pseudomonas syringae PmaYM7930 (Psy40)		COG5615	S	pfam05425		No	Yes
2505539306	4		PmaKN91_0041.00000350	FALSE	FALSE	FALSE	FALSE		Predicted integral membrane protein	465	154		Pseudomonas syringae PmaKN91 (Psy41)		COG5615	S	pfam05425		No	Yes
2505544893	4		PmeN6801_0068.00000570	FALSE	FALSE	FALSE	FALSE		Predicted integral membrane protein	465	154		Pseudomonas syringae PmeN6801 (Psy44)		COG5615	S	pfam05425		No	Yes
2505547356	4		PphY5_2_0016.00005630	FALSE	FALSE	FALSE	FALSE		Predicted integral membrane protein	465	154		Pseudomonas syringae PphY5_2 (Psy55)		COG5615	S	pfam05425		No	Yes
2505552816	4		PphNPS3121_0016.00000380	FALSE	FALSE	FALSE	FALSE		Predicted integral membrane protein	465	154		Pseudomonas syringae PphNPS3121 (Psy56)		COG5615	S	pfam05425		No	Yes
2505560090	4		PseHC_1_0032.00000330	FALSE	FALSE	FALSE	FALSE		Predicted integral membrane protein	465	154		Pseudomonas syringae PseHC_1 (Psy67)		COG5615	S	pfam05425		No	Yes
2505565915	4		Pta6606_0021.00000380	FALSE	FALSE	FALSE	FALSE		Predicted integral membrane protein	465	154		Pseudomonas syringae Pta6606 (Psy83)		COG5615	S	pfam05425		No	Yes
2505571343	4		PsyCit7_0283.00000160	FALSE	FALSE	FALSE	FALSE		Predicted integral membrane protein	465	154		Pseudomonas syringae PsyCit7 (Psy94)		COG5615	S	pfam05425		No	Yes
2505576495	4		Pla3988_0216.00000320	FALSE	FALSE	FALSE	FALSE		Predicted integral membrane protein	465	154		Pseudomonas syringae Pla3988 (Psy96)		COG5615	S	pfam05425		No	Yes
2505580400	4		Pph1302A_0019.00000330	FALSE	FALSE	FALSE	FALSE		Predicted integral membrane protein	465	154		Pseudomonas syringae Pph1302A (Psy97)		COG5615	S	pfam05425		No	Yes
2505585543	4		PphHB10Y_0010.00002720	FALSE	FALSE	FALSE	FALSE		Predicted integral membrane protein	465	154		Pseudomonas syringae PphHB10Y (Psy102)		COG5615	S	pfam05425		No	Yes
2505597189	4		PavBPIC631_0121.00000190	FALSE	FALSE	FALSE	FALSE		Predicted integral membrane protein	465	154		Pseudomonas syringae PavBPIC631 (Psy108)		COG5615	S	pfam05425		No	Yes
2505605243	4		PavISPaVe013_0033.00001290	FALSE	FALSE	FALSE	FALSE		Predicted integral membrane protein	465	154		Pseudomonas syringae PavISPaVe013 (Psy117)		COG5615	S	pfam05425		No	Yes
2505610532	4		PavISPaVe037_0026.00000350	FALSE	FALSE	FALSE	FALSE		Predicted integral membrane protein	465	154		Pseudomonas syringae PavISPaVe037 (Psy119)		COG5615	S	pfam05425		No	Yes
2505624252	4		PmaM6_0460.00000040	FALSE	FALSE	FALSE	FALSE		Predicted integral membrane protein	465	154		Pseudomonas syringae PmaM6 (Psy38)		COG5615	S	pfam05425		No	Yes
2505737821	16		Celgi_3084	FALSE	TRUE	FALSE	FALSE		Cytochrome c oxidase caa3-type, assembly factor CtaG-related	2067	688		Cellulomonas gilvus ATCC 13127		COG3336	S	pfam05425 pfam09678		No	Yes
2505796573	8		Rrad_1200	FALSE	FALSE	FALSE	FALSE		copper resistance D domain protein	948	315		Rubrobacter radiotolerans DSM 5868		COG1276	P	pfam05425		No	Yes
2505835029	10		AmiJ15_0077.00000060	FALSE	FALSE	FALSE	FALSE		Putative copper export protein	1899	632		Aminobacter sp. J15		COG1276	P	pfam00578 pfam05425		No	Yes
2505839194	10		AmiJ44_0008.00000050	FALSE	FALSE	FALSE	FALSE		Putative copper export protein	1899	632		Aminobacter sp. J44		COG1276	P	pfam00578 pfam05425		No	Yes
2505843254	9		BacJ22_0006.00000490	TRUE	FALSE	FALSE	TRUE		Putative copper export protein	1626	541		Bacillus subtilis J22		COG1276	P	pfam04234 pfam05425 pfam13115		Yes	Yes
2505847529	9		BacJ23_0006.00000500	TRUE	FALSE	FALSE	TRUE		Putative copper export protein	1626	541		Bacillus subtilis J23		COG1276	P	pfam04234 pfam05425 pfam13115		Yes	Yes
2505851940	9		BacJ24_0007.00001040	TRUE	FALSE	FALSE	FALSE		Putative copper export protein	1626	541		Bacillus subtilis J24		COG1276	P	pfam04234 pfam05425		Yes	Yes
2505856073	9		BacJ25_0007.00000500	TRUE	FALSE	FALSE	TRUE		Putative copper export protein	1626	541		Bacillus subtilis J25		COG1276	P	pfam04234 pfam05425 pfam13115		Yes	Yes
2505863965	9		BacJ26_0007.00000910	TRUE	FALSE	FALSE	FALSE		Putative copper export protein	1626	541		Bacillus subtilis J26		COG1276	P	pfam04234 pfam05425		Yes	Yes
2505866712	9		BacJ27_0029.00000260	TRUE	FALSE	FALSE	TRUE		Putative copper export protein	1626	541		Bacillus subtilis J27		COG1276	P	pfam04234 pfam05425 pfam13115		Yes	Yes
2505872791	10		CelJ34_0012.00000150	TRUE	FALSE	FALSE	FALSE		Putative copper export protein	1689	562		Cellulosimicrobium cellulans J34		COG1276	P	pfam04234 pfam05425		Yes	No
2505874702	10		CelJ34_0032.00000350	FALSE	TRUE	FALSE	FALSE		Predicted membrane protein	1290	429		Cellulosimicrobium cellulans J34		COG3336	S	pfam05425 pfam09678		No	Yes
2505875922	16		CelJ34_0007.00000340	FALSE	TRUE	FALSE	FALSE		Predicted membrane protein	2106	701		Cellulosimicrobium cellulans J34		COG3336	S	pfam05425 pfam09678		No	Yes
2505882624	9		GorJ30_0021.00000120	FALSE	FALSE	FALSE	FALSE		Putative copper export protein	888	295		Gordonia westfalica J30		COG1276	P	pfam05425		No	Yes
2505883828	16		GorJ30_0036.00000170	FALSE	TRUE	FALSE	FALSE		Predicted membrane protein	2025	674		Gordonia westfalica J30		COG3336	S	pfam05425 pfam09678		No	Yes
2505889675	16		IsoJ7_0034.00000010	FALSE	TRUE	FALSE	FALSE		Predicted membrane protein	1932	644		Isoptericola variabilis J7		COG3336	S	pfam05425 pfam09678		No	Yes
2505890137	16		IsoJ7_0045.00000110	FALSE	TRUE	FALSE	FALSE		Predicted membrane protein	2031	676		Isoptericola variabilis J7		COG3336	S	pfam05425 pfam09678		No	Yes
2505903144	16		MicJ28_0038.00000150	FALSE	TRUE	FALSE	FALSE		Predicted membrane protein	2259	752		Micrococcus luteus J28		COG3336	S	pfam05425 pfam09678		No	Yes
2505904215	9		NocJ9_0010.00000570	TRUE	FALSE	FALSE	FALSE		Uncharacterized protein, homolog of Cu resistance protein CopC	1734	577		Nocardioides sp. J9		COG2372	R	pfam04234 pfam05425		No	Yes
2505904308	9		NocJ9_0108.00000030	TRUE	FALSE	FALSE	FALSE		Putative copper export protein	1650	549		Nocardioides sp. J9		COG1276	P	pfam04234 pfam05425		Yes	Yes
2505906072	7		NocJ9_0031.00000260	TRUE	FALSE	FALSE	FALSE		Putative copper export protein	1626	541		Nocardioides sp. J9		COG1276	P	pfam04234 pfam05425		Yes	Yes
2505928312	9		PaeJ10_0004.00000140	TRUE	FALSE	FALSE	FALSE		Uncharacterized protein, homolog of Cu resistance protein CopC	1710	569		Paenibacillus sp. J10		COG2372	R	pfam04234 pfam05425		Yes	Yes
2505934024	16		RhoJ38_0001.00005240	FALSE	TRUE	FALSE	FALSE		Predicted membrane protein	2034	677		Rhodococcus rhodochrous J38		COG3336	S	pfam05425 pfam09678		No	Yes
2505937325	9		RhoJ38_0004.00001500	FALSE	FALSE	FALSE	FALSE		Putative copper export protein	939	312		Rhodococcus rhodochrous J38		COG1276	P	pfam05425		No	Yes
2505939105	8		RhoJ45_0001.00000230	FALSE	FALSE	FALSE	FALSE		Putative copper export protein	1512	503		Rhodococcus rhodochrous J45		COG1276	P	pfam05425		No	Yes
2505941766	16		RhoJ45_0002.00006010	FALSE	TRUE	FALSE	FALSE		Predicted membrane protein	2034	677		Rhodococcus rhodochrous J45		COG3336	S	pfam05425 pfam09678		No	Yes
2505945679	16		RhoJ21_0001.00006340	FALSE	TRUE	FALSE	FALSE		Predicted membrane protein	2034	677		Rhodococcus sp. J21		COG3336	S	pfam05425 pfam09678		No	Yes
2505946912	9		RhoJ21_0002.00000360	FALSE	FALSE	FALSE	FALSE		Putative copper export protein	939	312		Rhodococcus sp. J21		COG1276	P	pfam05425		No	Yes
2505948908	16		RhoJ21_0030.00000140	FALSE	TRUE	FALSE	FALSE		Predicted membrane protein	2013	670		Rhodococcus sp. J21		COG3336	S	pfam05425 pfam09678		No	No
2505951352	16		Isova_0256	FALSE	TRUE	FALSE	FALSE		Cytochrome c oxidase caa3-type, assembly factor CtaG-related	2031	676		Isoptericola variabilis 225		COG3336	S	pfam05425 pfam09678		No	Yes
2505958506	4		hydr_0001.00004370	FALSE	FALSE	FALSE	FALSE		Putative copper export protein	513	170		Hydrogenobaculum sp. SHO (Final Finished Sequence)				pfam05425		No	Yes
2505982434	4		Rhom172_2287	FALSE	FALSE	FALSE	FALSE		copper resistance D	501	166		Rhodothermus marinus SG0.5JP17-172		COG5615	S	pfam05425		No	Yes
2506006050	4		Psefu_3342	FALSE	FALSE	FALSE	FALSE		Predicted integral membrane protein	462	153		Pseudomonas fulva 12-X		COG5615	S	pfam05425		No	Yes
2506019569	4		Pagaricii_0287.00000010	FALSE	FALSE	FALSE	FALSE		Predicted integral membrane protein	465	154		Pseudomonas agarici NCPPB 2289		COG5615	S	pfam05425		No	Yes
2506027771	4		PflNZ007_0727.00000080	FALSE	FALSE	FALSE	FALSE		Predicted integral membrane protein	465	154		Pseudomonas fluorescens NZ007		COG5615	S	pfam05425		No	Yes
2506028377	8		PflNZ007_0093.00000020	FALSE	FALSE	FALSE	FALSE		Putative copper export protein	858	285		Pseudomonas fluorescens NZ007		COG1276	P	pfam05425		No	Yes
2506044650	16		Cfi_0001.00002580	FALSE	TRUE	FALSE	FALSE		Predicted membrane protein	2232	743		Cellulomonas fimi NRS 133, ATCC 484		COG3336	S	pfam05425 pfam09678		No	Yes
2506096977	4		Desca_2318	FALSE	FALSE	FALSE	FALSE		Predicted integral membrane protein	483	160		Desulfotomaculum carboxydivorans CO-1-SRB, DSM 14880		COG5615	S	pfam05425		No	Yes
2506230415	7		Marme_3512	FALSE	FALSE	FALSE	FALSE		copper resistance D domain protein	825	274		Marinomonas mediterranea MMB-1, ATCC 700492		COG1276	P	pfam05425		No	Yes
2506320709	9		ChT88_00024090	TRUE	FALSE	FALSE	TRUE		Uncharacterized protein, homolog of Cu resistance protein CopC	2010	669		Chloroflexus sp. T88 (Newbler 2.3 assembly)		COG2372	R	pfam04234 pfam05425 pfam13115		No	Yes
2506321512	9		ChT88_00032120	TRUE	FALSE	FALSE	FALSE		Uncharacterized protein, homolog of Cu resistance protein CopC	2022	673		Chloroflexus sp. T88 (Newbler 2.3 assembly)		COG2372	R	pfam04234 pfam05425		No	Yes
2506352860	2		PflNZI7_00023100	FALSE	FALSE	FALSE	FALSE		Copper resistance protein D.	282	93		Pseudomonas fluorescens NZ17				pfam05425		No	Yes
2506353839	8		PflNZI7_00032900	FALSE	FALSE	FALSE	FALSE		Putative copper export protein	876	291		Pseudomonas fluorescens NZ17		COG1276	P	pfam05425		No	Yes
2506355830	8		PflNZI7_00052840	FALSE	FALSE	FALSE	FALSE		Putative copper export protein	939	312		Pseudomonas fluorescens NZ17		COG1276	P	pfam05425		No	Yes
2506357454	8		PflNZ011_00015720	FALSE	FALSE	FALSE	FALSE		Putative copper export protein	858	285		Pseudomonas fluorescens NZ011		COG1276	P	pfam05425		No	Yes
2506359183	3		PflNZ011_00033020	FALSE	FALSE	FALSE	FALSE		Predicted integral membrane protein	402	133		Pseudomonas fluorescens NZ011		COG5615	S	pfam05425		No	Yes
2506362759	4		PflNZ052_00006860	FALSE	FALSE	FALSE	FALSE		Predicted integral membrane protein	465	154		Pseudomonas fluorescens NZ052		COG5615	S	pfam05425		No	Yes
2506363736	7		PflNZ052_00016630	FALSE	FALSE	FALSE	FALSE		Putative copper export protein	855	284		Pseudomonas fluorescens NZ052		COG1276	P	pfam05425		No	Yes
2506367948	8		PflNZ052_00058820	FALSE	FALSE	FALSE	FALSE		Putative copper export protein	858	285		Pseudomonas fluorescens NZ052		COG1276	P	pfam05425		No	Yes
2506377333	4		HydHO_0440	FALSE	FALSE	FALSE	FALSE		Putative copper export protein	513	170		Hydrogenobaculum sp. HO				pfam05425		No	Yes
2506379003	4		Hyd3684_0438	FALSE	FALSE	FALSE	FALSE		copper resistance D domain protein	513	170		Hydrogenobaculum sp. 3684 ((Finished QAed))				pfam05425		No	Yes
2506445891	16		FrEUN1f_1788	FALSE	TRUE	FALSE	FALSE		Cytochrome c oxidase caa3-type, assembly factor CtaG-related	2202	733		Frankia sp. EUN1f		COG3336	S	pfam05425 pfam09678		Yes	Yes
2506450527	9		FrEUN1f_6399	TRUE	FALSE	FALSE	FALSE		copper resistance protein CopC	2109	702		Frankia sp. EUN1f		COG2372	R	pfam04234 pfam05425		No	Yes
2506522418	8		Smalt168_00024270	FALSE	FALSE	FALSE	FALSE		Putative copper export protein	930	309		Stenotrophomonas maltophilia PML168		COG1276	P	pfam05425		No	Yes
2506577959	8		SerAS9_1893	FALSE	FALSE	FALSE	FALSE		copper resistance D domain protein	882	293		Serratia plymuthica AS9		COG1276	P	pfam05425		No	Yes
2506583097	8		SerAS12_1893	FALSE	FALSE	FALSE	FALSE		copper resistance D domain protein	882	293		Serratia plymuthica AS12		COG1276	P	pfam05425		No	Yes
2506588238	8		SerAS13_1894	FALSE	FALSE	FALSE	FALSE		copper resistance D domain protein	882	293		Serratia plymuthica AS13		COG1276	P	pfam05425		No	Yes
2506605515	4		Turpa_2093	FALSE	FALSE	FALSE	FALSE		Copper resistance protein D	450	149		Turneriella parva H, DSM 21527				pfam05425		No	Yes
2506671545	4		JJ_00022140	FALSE	FALSE	FALSE	FALSE		Predicted integral membrane protein	462	153		Dechloromonas sp. JJ		COG5615	S	pfam05425		No	Yes
2506695618	8		EcWSU1_02768	FALSE	FALSE	FALSE	FALSE		Inner membrane protein YebZ	870	289		Enterobacter cloacae EcWSU1		COG1276	P	pfam05425		No	Yes
2506703327	8		EschW_1232	FALSE	FALSE	FALSE	FALSE		Putative copper export protein	873	290		Escherichia coli W		COG1276	P	pfam05425		No	Yes
2506709931	8		Rahaq_2906	FALSE	FALSE	FALSE	FALSE		Putative copper export protein	885	294		Rahnella aquatilis CIP 78.65, ATCC 33071		COG1276	P	pfam05425		No	Yes
2506724408	4		Rhoma_2213	FALSE	FALSE	FALSE	FALSE		Predicted integral membrane protein	501	166		Rhodothermus marinus SG0.5JP17-171		COG5615	S	pfam05425		No	Yes
2506727471	4		Thith_2312	FALSE	FALSE	FALSE	FALSE		Predicted integral membrane protein	555	184		Thioalkalivibrio thiocyanoxidans ARh 4		COG5615	S	pfam05425		No	Yes
2506727875	8		Thith_2716	FALSE	FALSE	FALSE	FALSE		Putative copper export protein	1170	389		Thioalkalivibrio thiocyanoxidans ARh 4		COG1276	P	pfam05425		No	Yes
2506731345	10		Natoc_2629	TRUE	FALSE	FALSE	FALSE		Putative copper export protein	2025	674		Natronococcus occultus SP4, DSM 3396		COG1276	P	pfam04234 pfam05425		No	Yes
2506744684	9		B1NLA3E_4238	TRUE	FALSE	FALSE	FALSE		Putative copper export protein	1584	527		Bacillus sp. 1NLA3E		COG1276	P	pfam04234 pfam05425		No	Yes
2506754169	4		Thini_4145	FALSE	FALSE	FALSE	FALSE		Predicted integral membrane protein	459	152		Thiothrix nivea JP2, DSM 5205		COG5615	S	pfam05425		No	Yes
2506757210	4		Myrod_2506	FALSE	FALSE	FALSE	FALSE		Copper resistance protein D	456	151		Myroides odoratus DSM 2801				pfam05425		No	Yes
2506761840	9		BS_27E1_00033560	TRUE	FALSE	FALSE	TRUE		Putative copper export protein	1626	541		Bacillus subtilis 27E1		COG1276	P	pfam04234 pfam05425 pfam13115		Yes	Yes
2506765190	9		BS_27E2_00019900	TRUE	FALSE	FALSE	FALSE		Putative copper export protein	1626	541		Bacillus subtilis 27E2		COG1276	P	pfam04234 pfam05425		Yes	Yes
2506838685	9		NeocalSC4_00093450	TRUE	FALSE	FALSE	FALSE		Putative copper export protein	1293	431		Neocallimastix sp. SC4 (gene modules)		COG1276	P	pfam04234 pfam05425		Yes	Yes
2506845134	4		Niaso_1704	FALSE	FALSE	FALSE	FALSE		Putative copper export protein	450	149		Niabella soli JS13-8, DSM 19437				pfam05425		No	Yes
2506869024	9		FsymDg_4454	TRUE	FALSE	FALSE	FALSE		copper resistance protein CopC	2211	736		Candidatus Frankia datiscae Dg1		COG1276	P	pfam04234 pfam05425		No	Yes
2506872634	16		Mycch_3504	FALSE	TRUE	FALSE	FALSE		putative membrane protein	2019	672	acUOB	Mycobacterium chubuense NBB4		COG3336	S	pfam05425 pfam09678		Yes	Yes
2506874161	9		Mycch_5031	FALSE	FALSE	FALSE	FALSE		putative copper export protein	945	314	acUOB	Mycobacterium chubuense NBB4		COG1276	P	pfam05425		No	Yes
2506874327	8		Mycch_5197	FALSE	FALSE	FALSE	FALSE		putative copper export protein	987	328	acUOB	Mycobacterium chubuense NBB4		COG1276	P	pfam05425		No	Yes
2506875376	4		CC440_00001740	FALSE	FALSE	FALSE	FALSE		Predicted integral membrane protein	465	154		Pseudomonas syringae CC440 (CC440)		COG5615	S	pfam05425		No	Yes
2506882949	4		USA007_00019860	FALSE	FALSE	FALSE	FALSE		Predicted integral membrane protein	465	154		Pseudomonas syringae USA007 (USA007)		COG5615	S	pfam05425		No	Yes
2506892557	4		CC457_00056580	FALSE	FALSE	FALSE	FALSE		Predicted integral membrane protein	465	154		Pseudomonas syringae CC457 (CC457)		COG5615	S	pfam05425		No	Yes
2506895701	4		CC1458_00029580	FALSE	FALSE	FALSE	FALSE		Predicted integral membrane protein	465	154		Pseudomonas syringae CC1458 (CC1458)		COG5615	S	pfam05425		No	Yes
2506903991	4		CC1466_00053840	FALSE	FALSE	FALSE	FALSE		Predicted integral membrane protein	465	154		Pseudomonas syringae CC1466 (CC1466)		COG5615	S	pfam05425		No	Yes
2506906514	3		CC1513_00021660	FALSE	FALSE	FALSE	FALSE		Predicted integral membrane protein	465	154		Pseudomonas syringae CC1513 (CC1513)		COG5615	S	pfam05425		No	Yes
2506910305	4		CC1524_00003040	FALSE	FALSE	FALSE	FALSE		Predicted integral membrane protein	465	154		Pseudomonas syringae CC1524 (CC1524)		COG5615	S	pfam05425		No	Yes
2506917939	4		CC1544_00022580	FALSE	FALSE	FALSE	FALSE		Predicted integral membrane protein	465	154		Pseudomonas syringae CC1544 (CC1544)		COG5615	S	pfam05425		No	Yes
2506922325	4		CC94_00012320	FALSE	FALSE	FALSE	FALSE		Predicted integral membrane protein	465	154		Pseudomonas syringae CC94 (CC94)		COG5615	S	pfam05425		No	Yes
2506928583	4		CC1557_00014680	FALSE	FALSE	FALSE	FALSE		Predicted integral membrane protein	465	154		Pseudomonas syringae CC1557 (CC1557)		COG5615	S	pfam05425		No	Yes
2506933214	4		CC1582_00003000	FALSE	FALSE	FALSE	FALSE		Predicted integral membrane protein	465	154		Pseudomonas viridiflava CC1582 (CC1582)		COG5615	S	pfam05425		No	Yes
2506959637	4		CC1543_00033770	FALSE	FALSE	FALSE	FALSE		Predicted integral membrane protein	465	154		Pseudomonas syringae CC1543 (CC1543)		COG5615	S	pfam05425		No	Yes
2506964406	4		CC1417_00019760	FALSE	FALSE	FALSE	FALSE		Predicted integral membrane protein	465	154		Pseudomonas syringae CC1417 (CC1417)		COG5615	S	pfam05425		No	Yes
2506971972	4		TA043_00040680	FALSE	FALSE	FALSE	FALSE		Predicted integral membrane protein	465	154		Pseudomonas viridiflava TA043 (TA043)		COG5615	S	pfam05425		No	Yes
2506975498	4		CC1559_00021330	FALSE	FALSE	FALSE	FALSE		Predicted integral membrane protein	465	154		Pseudomonas syringae CC1559 (CC1559)		COG5615	S	pfam05425		No	Yes
2506981623	3		J07ABHX67v2_00008650	FALSE	FALSE	FALSE	FALSE		Copper resistance protein D.	459	152		Halobaculum sp. J07HB67 (version 2)				pfam05425		No	Yes
2507050373	10		Paela_02536	FALSE	FALSE	FALSE	FALSE		Putative copper export protein	1089	362		Paenibacillus lactis 154		COG1276	P	pfam05425		No	Yes
2507064067	16		MycrhDRAFT_06560	FALSE	TRUE	FALSE	FALSE		Predicted membrane protein	1998	665		Mycobacterium rhodesiae JS60		COG3336	S	pfam05425 pfam09678		No	Yes	pf05751	fixH
2507072144	4		tjr2_00002090	FALSE	FALSE	FALSE	FALSE		Predicted integral membrane protein	465	154		Thiomicrospira sp. JR2		COG5615	S	pfam05425		No	Yes
2507085461	4		Pse6802_0146	FALSE	FALSE	FALSE	FALSE		Copper resistance protein D.	447	148		Pseudanabaena sp. PCC 6802				pfam05425		No	Yes
2507094708	4		PacA10853_00039600	FALSE	FALSE	FALSE	FALSE		Predicted integral membrane protein	465	154		Pseudomonas syringae PacA10853		COG5615	S	pfam05425		No	Yes
2507100734	4		PmpFTRS_U7_00043010	FALSE	FALSE	FALSE	FALSE		Predicted integral membrane protein	465	154		Pseudomonas syringae PmpFTRS_U7		COG5615	S	pfam05425		No	Yes
2507107478	4		Psv4352_00052790	FALSE	FALSE	FALSE	FALSE		Predicted integral membrane protein	465	154		Pseudomonas syringae Psv4352		COG5615	S	pfam05425		No	Yes
2507111830	8		PsyB48_00038590	FALSE	FALSE	FALSE	FALSE		Putative copper export protein	936	311		Pseudomonas syringae PsyB48		COG1276	P	pfam05425		No	Yes
2507112615	4		PsyB48_00046450	FALSE	FALSE	FALSE	FALSE		Predicted integral membrane protein	465	154		Pseudomonas syringae PsyB48		COG5615	S	pfam05425		No	Yes
2507121427	16		Mycsm_04305	FALSE	TRUE	FALSE	FALSE		Predicted membrane protein	2007	668		Mycobacterium smegmatis JS623		COG3336	S	pfam05425 pfam09678		No	Yes
2507123355	7		Mycsm_06233	FALSE	FALSE	FALSE	FALSE		Putative copper export protein	843	280		Mycobacterium smegmatis JS623		COG1276	P	pfam05425		No	Yes
2507213090	4		Psest_2858	FALSE	FALSE	FALSE	FALSE		Predicted integral membrane protein	465	154		Pseudomonas stutzeri RCH2		COG5615	S	pfam05425		No	Yes
2507213632	4		Psest_3400	FALSE	FALSE	FALSE	FALSE		Copper resistance protein D.	435	144		Pseudomonas stutzeri RCH2				pfam05425		No	Yes
2507267646	4		UB246_00012350	FALSE	FALSE	FALSE	FALSE		Predicted integral membrane protein	465	154		Pseudomonas syringae UB246 (UB246)		COG5615	S	pfam05425		No	Yes
2507267999	8		UB246_00015880	FALSE	FALSE	FALSE	FALSE		Putative copper export protein	873	290		Pseudomonas syringae UB246 (UB246)		COG1276	P	pfam05425		No	Yes
2507276244	4		UB303_00039760	FALSE	FALSE	FALSE	FALSE		Predicted integral membrane protein	465	154		Pseudomonas syringae UB303 (UB303)		COG5615	S	pfam05425		No	Yes
2507338417	4		Pjap_00010180	FALSE	FALSE	FALSE	FALSE		Predicted integral membrane protein	465	154		Pseudomonas syringae pv. japonica M301072PT (Japonica)		COG5615	S	pfam05425		No	Yes
2507341963	8		Pjap_00045710	FALSE	FALSE	FALSE	FALSE		Putative copper export protein	933	310		Pseudomonas syringae pv. japonica M301072PT (Japonica)		COG1276	P	pfam05425		No	Yes
2507348561	4		Lac107_00015350	FALSE	FALSE	FALSE	FALSE		Predicted integral membrane protein	465	154		Pseudomonas syringae pv. lachrymans 107 MAFF301315 (Lac 107)		COG5615	S	pfam05425		No	Yes
2507354357	4		Pae_ATCC21472_00004820	FALSE	FALSE	FALSE	FALSE		Putative copper export protein	435	144		Pseudomonas aeruginosa 1-7-2A, ATCC 21472 (Initial Paired-End assembly)				pfam05425		No	Yes
2507357185	8		Pae_ATCC21472_00033110	FALSE	FALSE	FALSE	FALSE		Putative copper export protein	927	308		Pseudomonas aeruginosa 1-7-2A, ATCC 21472 (Initial Paired-End assembly)		COG1276	P	pfam05425		No	Yes
2507358299	4		Pae_ATCC21472_00044270	FALSE	FALSE	FALSE	FALSE		Predicted integral membrane protein	465	154		Pseudomonas aeruginosa 1-7-2A, ATCC 21472 (Initial Paired-End assembly)		COG5615	S	pfam05425		No	Yes
2507369436	4		Pae_HUN_PA531_00018560	FALSE	FALSE	FALSE	FALSE		Putative copper export protein	435	144		Pseudomonas aeruginosa HUN_PA531 (Initial Paired-End assembly)				pfam05425		No	Yes
2507374339	4		Pae_HUN_PA531_00067700	FALSE	FALSE	FALSE	FALSE		Predicted integral membrane protein	465	154		Pseudomonas aeruginosa HUN_PA531 (Initial Paired-End assembly)		COG5615	S	pfam05425		No	Yes
2507379345	4		Pae_ITL_134MG_00048270	FALSE	FALSE	FALSE	FALSE		Putative copper export protein	435	144		Pseudomonas aeruginosa ITL_134MG (Initial Paired-End assembly)				pfam05425		No	Yes
2507379981	4		Pae_ITL_134MG_00054630	FALSE	FALSE	FALSE	FALSE		Predicted integral membrane protein	465	154		Pseudomonas aeruginosa ITL_134MG (Initial Paired-End assembly)		COG5615	S	pfam05425		No	Yes
2507381219	8		Pae_ITL_134MG_00067020	FALSE	FALSE	FALSE	FALSE		Putative copper export protein	927	308		Pseudomonas aeruginosa ITL_134MG (Initial Paired-End assembly)		COG1276	P	pfam05425		No	Yes
2507382121	4		Pae_PHU46_00006010	FALSE	FALSE	FALSE	FALSE		Putative copper export protein	435	144		Pseudomonas aeruginosa PHU46 (Initial Paired-End assembly)				pfam05425		No	Yes
2507387865	4		Pae_PHU46_00063530	FALSE	FALSE	FALSE	FALSE		Predicted integral membrane protein	465	154		Pseudomonas aeruginosa PHU46 (Initial Paired-End assembly)		COG5615	S	pfam05425		No	Yes
2507389255	4		Pae_PsVir01_00009070	FALSE	FALSE	FALSE	FALSE		Putative copper export protein	435	144		Pseudomonas aeruginosa PsVir01 (Initial Paired-End assembly)				pfam05425		No	Yes
2507390148	4		Pae_PsVir01_00018010	FALSE	FALSE	FALSE	FALSE		Predicted integral membrane protein	465	154		Pseudomonas aeruginosa PsVir01 (Initial Paired-End assembly)		COG5615	S	pfam05425		No	Yes
2507394105	8		Pae_PsVir01_00057640	FALSE	FALSE	FALSE	FALSE		Putative copper export protein	927	308		Pseudomonas aeruginosa PsVir01 (Initial Paired-End assembly)		COG1276	P	pfam05425		No	Yes
2507404714	4		DesniDRAFT_1778	FALSE	FALSE	FALSE	FALSE		Predicted integral membrane protein	483	160		Desulfotomaculum nigrificans DSM 574		COG5615	S	pfam05425		No	Yes
2507406427	10		MettrDRAFT_0379	FALSE	FALSE	TRUE	FALSE		Putative copper export protein	1908	635	aMOB	Methylosinus trichosporium OB3b		COG1276	P	pfam05425 pfam13442		No	Yes
2507406883	14		MettrDRAFT_0835	FALSE	FALSE	FALSE	FALSE		Putative copper export protein	1608	535	aMOB	Methylosinus trichosporium OB3b				pfam05425		No	Yes
2507432011	4		TLP2_00026400	FALSE	FALSE	FALSE	FALSE		Predicted integral membrane protein	465	154		Pseudomonas syringae TLP2 (TLP2)		COG5615	S	pfam05425		No	Yes
2507463112	4		HydSN_0449	FALSE	FALSE	FALSE	FALSE		Putative copper export protein	513	170		Hydrogenobaculum sp. SN				pfam05425		No	Yes
2507509306	9		Bra1417DRAFT_4995	TRUE	FALSE	FALSE	FALSE		Putative copper export protein	1563	520		Bradyrhizobium sp. WSM1417		COG1276	P	pfam04234 pfam05425		Yes	Yes
2507516494	8		CrFGI571_1798	FALSE	FALSE	FALSE	FALSE		Putative copper export protein	870	289		Enterobacteriaceae bacterium FGI 57		COG1276	P	pfam05425		No	Yes
2507526968	2		ProkrDRAFT_00019780	FALSE	FALSE	FALSE	FALSE		Putative copper export protein	378	125		Promicromonospora kroppenstedtii RS16, DSM 19349				pfam05425		No	Yes
2507528257	16		ProkrDRAFT_00032700	FALSE	TRUE	FALSE	FALSE		Predicted membrane protein	2049	682		Promicromonospora kroppenstedtii RS16, DSM 19349		COG3336	S	pfam05425 pfam09678		No	Yes
2508501288	4		LT1_00002920	FALSE	FALSE	FALSE	FALSE		Predicted integral membrane protein	459	152		Dechlorobacter hydrogenophilus LT-1		COG5615	S	pfam05425		No	Yes
2508515201	4		Desgi_4236	FALSE	FALSE	FALSE	FALSE		Predicted integral membrane protein	510	169		Desulfotomaculum gibsoniae Groll, DSM 7213		COG5615	S	pfam05425		No	Yes
2508524694	4		ate_1724	FALSE	FALSE	FALSE	FALSE		Predicted integral membrane protein	468	155		Acidovorax temperans CB2 (Finished +Insert)		COG5615	S	pfam05425		No	Yes
2508527751	4		PseuPK_00009210	FALSE	FALSE	FALSE	FALSE		Predicted integral membrane protein	465	154		Pseudomonas sp. PK		COG5615	S	pfam05425		No	Yes
2508528463	4		PseuPK_00016340	FALSE	FALSE	FALSE	FALSE		Copper resistance protein D.	435	144		Pseudomonas sp. PK				pfam05425		No	Yes
2508543364	9		Bra471DRAFT_04445	TRUE	FALSE	FALSE	FALSE		Putative copper export protein	1563	520		Bradyrhizobium sp. WSM471		COG1276	P	pfam04234 pfam05425		Yes	Yes
2508546570	12		MetalDRAFT_0222	FALSE	FALSE	FALSE	FALSE		Putative copper export protein	1629	542	gMOB	Methylomicrobium album BG8		COG1276	P	pfam05425		No	Yes
2508549211	14	ctag	MetalDRAFT_2864	FALSE	FALSE	FALSE	FALSE		Putative copper export protein	1656	551	gMOB	Methylomicrobium album BG8		COG1276	P	pfam05425		No	Yes
2508549972	4		MetalDRAFT_3625	FALSE	FALSE	FALSE	FALSE		Putative copper export protein	444	147	gMOB	Methylomicrobium album BG8				pfam05425		No	Yes
2508554057	9		SacmaDRAFT_0228	FALSE	FALSE	FALSE	FALSE		Putative copper export protein	1023	340		Saccharomonospora marina XMU15, DSM 45390		COG1276	P	pfam05425		Yes	Yes
2508555438	15		SacmaDRAFT_1610	FALSE	TRUE	FALSE	FALSE		Predicted membrane protein	1971	656		Saccharomonospora marina XMU15, DSM 45390		COG3336	S	pfam05425 pfam09678		No	Yes
2508559313	9		SacmaDRAFT_5485	TRUE	FALSE	FALSE	FALSE		Putative copper export protein	1725	574		Saccharomonospora marina XMU15, DSM 45390		COG1276	P	pfam04234 pfam05425		Yes	Yes
2508559695	9		SaccyDRAFT_0082	FALSE	FALSE	FALSE	FALSE		Putative copper export protein	1047	348		Saccharomonospora cyanea NA-134		COG1276	P	pfam05425		No	Yes
2508561013	15		SaccyDRAFT_1401	FALSE	TRUE	FALSE	FALSE		Predicted membrane protein	1950	649		Saccharomonospora cyanea NA-134		COG3336	S	pfam05425 pfam09678		No	Yes
2508574440	4		HAH_00018490	FALSE	FALSE	FALSE	FALSE		Copper resistance protein D.	432	143		Haloarcula californiae BJGN-2, ATCC 33799				pfam05425		No	Yes
2508577992	4		HAI_00007050	FALSE	FALSE	FALSE	FALSE		Copper resistance protein D.	432	143		Haloarcula sinaiiensis ATCC 33800				pfam05425		No	Yes
2508583666	4		HAJ_00017860	FALSE	FALSE	FALSE	FALSE		Copper resistance protein D.	432	143		Haloarcula vallismortis J.F. 54, ATCC 29715				pfam05425		No	Yes
2508586343	4		HAL_00002950	FALSE	FALSE	FALSE	FALSE		Copper resistance protein D.	450	149		Haloferax mediterranei R-4, ATCC 33500				pfam05425		No	Yes
2508613320	10		BacJ37DRAFT_00019040	FALSE	FALSE	FALSE	FALSE		Putative copper export protein	1083	360		Bacillus sp. J37		COG1276	P	pfam05425		No	Yes
2508618912	4		BorpeDRAFT_00021310	FALSE	FALSE	FALSE	FALSE		Predicted integral membrane protein	468	155		Bordetella petrii J49		COG5615	S	pfam05425		No	Yes
2508621191	10		CelceDRAFT_00004110	FALSE	TRUE	FALSE	FALSE		Predicted membrane protein	1290	429		Cellulosimicrobium cellulans J36		COG3336	S	pfam05425 pfam09678		No	Yes
2508621867	16		CelceDRAFT_00010880	FALSE	TRUE	FALSE	FALSE		Predicted membrane protein	2106	701		Cellulosimicrobium cellulans J36		COG3336	S	pfam05425 pfam09678		No	Yes
2508621961	9		CelceDRAFT_00011820	TRUE	FALSE	FALSE	FALSE		Putative copper export protein	1704	567		Cellulosimicrobium cellulans J36		COG1276	P	pfam04234 pfam05425		Yes	Yes
2508661757	9		BacgiDRAFT_00037400	TRUE	FALSE	FALSE	TRUE		Putative copper export protein	1656	551		Bacillus ginsengihumi J57		COG1276	P	pfam04234 pfam05425 pfam13115		No	Yes
2508665487	10		AmiJ41DRAFT_00034660	FALSE	FALSE	FALSE	FALSE		Putative copper export protein	1899	632		Aminobacter sp. J41		COG1276	P	pfam00578 pfam05425		No	Yes
2508671434	10		FrCN3DRAFT_1124	TRUE	FALSE	FALSE	FALSE		Uncharacterized protein, homolog of Cu resistance protein CopC	1965	654		Frankia sp. CN3		COG2372	R	pfam04234 pfam05425		Yes	Yes
2508677475	16		FrCN3DRAFT_7166	FALSE	TRUE	FALSE	FALSE		Predicted membrane protein	2259	752		Frankia sp. CN3		COG3336	S	pfam05425 pfam09678		No	Yes
2508678957	4		BCh11DRAFT_0234	FALSE	FALSE	FALSE	FALSE		Predicted integral membrane protein	459	152		Burkholderia sp. Ch1-1		COG5615	S	pfam05425		No	Yes
2508683927	8		BCh11DRAFT_5206	FALSE	FALSE	FALSE	FALSE		Putative copper export protein	930	309		Burkholderia sp. Ch1-1		COG1276	P	pfam05425		No	Yes
2508686448	8		BCh11DRAFT_7729	FALSE	FALSE	FALSE	FALSE		Putative copper export protein	942	313		Burkholderia sp. Ch1-1		COG1276	P	pfam05425		No	Yes
2508698250	1		Bra1253DRAFT_07782	FALSE	FALSE	FALSE	FALSE		Putative copper export protein	240	79		Bradyrhizobium sp. WSM1253				pfam05425		No	Yes
2508698864	9		Bra1253DRAFT_08396	TRUE	FALSE	FALSE	FALSE		putative copper export protein	1563	520		Bradyrhizobium sp. WSM1253		COG1276	P	pfam04234 pfam05425		Yes	Yes
2508705295	9		SacazDRAFT_2835	FALSE	FALSE	FALSE	FALSE		Putative copper export protein	1047	348		Saccharomonospora azurea NA-128, DSM 44631		COG1276	P	pfam05425		No	Yes
2508706491	16		SacazDRAFT_4032	FALSE	TRUE	FALSE	FALSE		Predicted membrane protein	1968	655		Saccharomonospora azurea NA-128, DSM 44631		COG3336	S	pfam05425 pfam09678		No	Yes
2508713403	4		BegalDRAFT_0327	FALSE	FALSE	FALSE	FALSE		putative integral membrane protein	465	154		Beggiatoa alba B18LD		COG5615	S	pfam05425		No	Yes
2508745664	7		MyctuDRAFT_5029	TRUE	FALSE	FALSE	FALSE		Uncharacterized protein, homolog of Cu resistance protein CopC	1899	632		Mycobacterium tusciae JS617		COG2372	R	pfam04234 pfam05425		Yes	Yes
2508746478	9		MyctuDRAFT_5843	FALSE	FALSE	FALSE	FALSE		Putative copper export protein	945	314		Mycobacterium tusciae JS617		COG1276	P	pfam05425		No	Yes
2508747662	16		MyctuDRAFT_7027	FALSE	TRUE	FALSE	FALSE		Predicted membrane protein	2007	668		Mycobacterium tusciae JS617		COG3336	S	pfam05425 pfam09678		Yes	Yes
2508755067	4		Pac_00019830	FALSE	FALSE	FALSE	FALSE		Predicted integral membrane protein	465	154		Pseudomonas syringae pv. aceris M302273PT (Aceris)		COG5615	S	pfam05425		No	Yes
2508762304	4		Pan_00035040	FALSE	FALSE	FALSE	FALSE		Predicted integral membrane protein	465	154		Pseudomonas syringae pv. actinidiae M302091 (Actinidiae)		COG5615	S	pfam05425		No	Yes
2508765796	4		Pae_00015890	FALSE	FALSE	FALSE	FALSE		Predicted integral membrane protein	465	154		Pseudomonas syringae pv. aesculi 0893_23 (Aesculi)		COG5615	S	pfam05425		No	Yes
2508772099	4		Ptt_00022740	FALSE	FALSE	FALSE	FALSE		Predicted integral membrane protein	465	154		Pseudomonas syringae pv. aptata DSM 50252 (Aptata)		COG5615	S	pfam05425		No	Yes
2508778707	4		Pgy_00016450	FALSE	FALSE	FALSE	FALSE		Predicted integral membrane protein	465	154		Pseudomonas syringae pv. glycinea R4 A29-2 (Glycinea)		COG5615	S	pfam05425		No	Yes
2508786614	4		Pmo_00020340	FALSE	FALSE	FALSE	FALSE		Predicted integral membrane protein	465	154		Pseudomonas syringae pv. mori MAFF301020 (Mori)		COG5615	S	pfam05425		No	Yes
2508796297	4		Pmp_00044930	FALSE	FALSE	FALSE	FALSE		Predicted integral membrane protein	465	154		Pseudomonas syringae pv. morsprunorum M302280PT (Morsprunorum)		COG5615	S	pfam05425		No	Yes
2508797834	4		Ppi_00004440	FALSE	FALSE	FALSE	FALSE		Predicted integral membrane protein	465	154		Pseudomonas syringae pv. pisi 1704B (Pisi)		COG5615	S	pfam05425		No	Yes
2508807095	4		Lac106_00012960	FALSE	FALSE	FALSE	FALSE		Predicted integral membrane protein	465	154		Pseudomonas syringae pv. lachrymans M302278PT (Lac106)		COG5615	S	pfam05425		No	Yes
2508813199	4		Pta_00019870	FALSE	FALSE	FALSE	FALSE		Predicted integral membrane protein	465	154		Pseudomonas syringae pv. tabaci ATCC 11528 (Tabaci)		COG5615	S	pfam05425		No	Yes
2508815867	8		Pta_00046600	FALSE	FALSE	FALSE	FALSE		Putative copper export protein	936	311		Pseudomonas syringae pv. tabaci ATCC 11528 (Tabaci)		COG1276	P	pfam05425		No	Yes
2508817611	4		Cit7_00001360	FALSE	FALSE	FALSE	FALSE		Predicted integral membrane protein	465	154		Pseudomonas syringae Cit 7 (Cit7)		COG5615	S	pfam05425		No	Yes
2508824758	4		Pma_00007310	FALSE	FALSE	FALSE	FALSE		Predicted integral membrane protein	465	154		Pseudomonas syringae pv. maculicola ES4326 (Maculicola)		COG5615	S	pfam05425		No	Yes
2508831059	13		MetszDRAFT_1222	FALSE	FALSE	FALSE	FALSE		Putative copper export protein	1662	553	gMOB	Methylocaldum szegediense O-12		COG1276	P	pfam05425		No	Yes
2508831672	4		MetszDRAFT_1835	FALSE	FALSE	FALSE	FALSE		Putative copper export protein	444	147	gMOB	Methylocaldum szegediense O-12				pfam05425		No	Yes
2508843508	8		Theco_1097	TRUE	FALSE	FALSE	FALSE		Putative copper export protein	1641	546		Thermobacillus composti KWC4, DSM 18247		COG1276	P	pfam04234 pfam05425		Yes	Yes
2508851920	8		SerS4DRAFT_2108	FALSE	FALSE	FALSE	FALSE		Putative copper export protein	882	293		Serratia proteamaculans S4		COG1276	P	pfam05425		No	Yes
2508856431	4		Pphimg_00014800	FALSE	FALSE	FALSE	FALSE		Predicted integral membrane protein	465	154		Pseudomonas syringae Pph1448A (1448A gold standard)		COG5615	S	pfam05425		No	Yes
2508862167	8		Psyimg_00015430	FALSE	FALSE	FALSE	FALSE		Putative copper export protein	933	310		Pseudomonas syringae pv. syringae B728a (B728A gold standard)		COG1276	P	pfam05425		No	Yes
2508864611	4		Psyimg_00039930	FALSE	FALSE	FALSE	FALSE		Predicted integral membrane protein	465	154		Pseudomonas syringae pv. syringae B728a (B728A gold standard)		COG5615	S	pfam05425		No	Yes
2508870178	4		PSPTOimg_00042570	FALSE	FALSE	FALSE	FALSE		Predicted integral membrane protein	465	154		Pseudomonas syringae pv. tomato DC3000 (DC3000 gold standard)		COG5615	S	pfam05425		No	Yes
2509041783	7		MycrhN1_1899	FALSE	FALSE	FALSE	FALSE		Putative copper export protein	945	314	acUOB	Mycobacterium rhodesiae NBB3		COG1276	P	pfam05425		No	Yes	pf13115	ykta
2509042732	7		MycrhN1_2848	TRUE	FALSE	FALSE	FALSE		Putative copper export protein	1854	617	acUOB	Mycobacterium rhodesiae NBB3		COG1276	P	pfam04234 pfam05425		No	Yes	pf09678	Caa3_CtaG	cyt c ox assembly
2509043991	16		MycrhN1_4107	FALSE	TRUE	FALSE	FALSE		Predicted membrane protein	2007	668	acUOB	Mycobacterium rhodesiae NBB3		COG3336	S	pfam05425 pfam09678		Yes	Yes
2509047400	4		ThimaDRAFT_1173	FALSE	FALSE	FALSE	FALSE		Predicted integral membrane protein	477	158		Thiocapsa marina 5811, DSM 5653		COG5615	S	pfam05425		No	Yes
2509061458	9		Haur_02802	TRUE	FALSE	FALSE	FALSE		Putative copper export protein	1716	571		Herpetosiphon aurantiacus DSM 785		COG1276	P	pfam04234 pfam05425		Yes	Yes
2509066276	4		BorpeJ51DRAFT_00019670	FALSE	FALSE	FALSE	FALSE		Predicted integral membrane protein	468	155		Bordetella petrii J51		COG5615	S	pfam05425		No	Yes
2509074684	8		MicloDRAFT_00013240	FALSE	FALSE	FALSE	FALSE		putative copper export protein	1239	412		Microvirga lotononidis WSM3557		COG1276	P	pfam05425		No	Yes
2509095385	9		SacglDRAFT_0112	FALSE	FALSE	FALSE	FALSE		Putative copper export protein	1047	348		Saccharomonospora glauca K62, DSM 43769		COG1276	P	pfam05425		No	Yes
2509096573	16		SacglDRAFT_1301	FALSE	TRUE	FALSE	FALSE		Predicted membrane protein	2088	695		Saccharomonospora glauca K62, DSM 43769		COG3336	S	pfam05425 pfam09678		No	Yes
2509116700	9		Mesw3626DRAFT_00037790	TRUE	FALSE	FALSE	FALSE		Putative copper export protein	1635	544		Mesorhizobium sp. WSM3626		COG1276	P	pfam04234 pfam05425		No	Yes
2509121455	4		BurW3556DRAFT_00022870	FALSE	FALSE	FALSE	FALSE		Predicted integral membrane protein	459	152		Burkholderia dilworthii WSM3556		COG5615	S	pfam05425		No	Yes
2509121878	8		BurW3556DRAFT_00027120	FALSE	FALSE	FALSE	FALSE		Putative copper export protein	930	309		Burkholderia dilworthii WSM3556		COG1276	P	pfam05425		No	Yes
2509126120	8		BurW3556DRAFT_00069610	FALSE	FALSE	FALSE	FALSE		Putative copper export protein	882	293		Burkholderia dilworthii WSM3556		COG1276	P	pfam05425		No	Yes
2509127676	4		BurW2232DRAFT_00013800	FALSE	FALSE	FALSE	FALSE		Predicted integral membrane protein	459	152		Burkholderia sp. WSM2232		COG5615	S	pfam05425		No	Yes
2509128098	7		BurW2232DRAFT_00018040	FALSE	FALSE	FALSE	FALSE		Putative copper export protein	942	313		Burkholderia sp. WSM2232		COG1276	P	pfam05425		No	Yes
2509130293	8		BurW2232DRAFT_00040010	FALSE	FALSE	FALSE	FALSE		Putative copper export protein	930	309		Burkholderia sp. WSM2232		COG1276	P	pfam05425		No	Yes
2509134728	9		MesloDRAFT_00020550	TRUE	FALSE	FALSE	FALSE		Putative copper export protein	1695	564		Mesorhizobium sp. WSM1293		COG1276	P	pfam04234 pfam05425		No	Yes
2509142423	9		MesW2561DRAFT_00030370	TRUE	FALSE	FALSE	FALSE		Putative copper export protein	1623	540		Mesorhizobium sp. WSM2561		COG1276	P	pfam04234 pfam05425		Yes	Yes
2509147345	8		BraARR65DRAFT_00010480	FALSE	FALSE	FALSE	FALSE		Putative copper export protein	960	319		Bradyrhizobium sp. ARR65		COG1276	P	pfam05425		No	Yes
2509339367	4		PsesuJ47DRAFT_00011940	FALSE	FALSE	FALSE	FALSE		Predicted integral membrane protein	465	154		Pseudomonas thermotolerans J53		COG5615	S	pfam05425		No	Yes
2509341773	10		PaeJ13DRAFT_00000130	FALSE	FALSE	FALSE	FALSE		Putative copper export protein	1089	362		Bacillus sp. J13		COG1276	P	pfam05425		No	Yes
2509344584	10		PaeJ13DRAFT_00028460	FALSE	FALSE	FALSE	FALSE		Putative copper export protein	1086	361		Bacillus sp. J13				pfam05425		No	Yes
2509348312	8		Psesu3DRAFT_00004210	FALSE	FALSE	FALSE	FALSE		Putative copper export protein	930	309		Pseudoxanthomonas suwonensis J42		COG1276	P	pfam05425		No	Yes
2509352995	7		NocJ54DRAFT_00019100	TRUE	FALSE	FALSE	FALSE		Putative copper export protein	1626	541		Nocardioides sp. J54		COG1276	P	pfam04234 pfam05425		Yes	Yes
2509353933	9		NocJ54DRAFT_00028490	TRUE	FALSE	FALSE	FALSE		Uncharacterized protein, homolog of Cu resistance protein CopC	1665	554		Nocardioides sp. J54		COG2372	R	pfam04234 pfam05425		Yes	Yes
2509355100	9		NocJ54DRAFT_00040180	TRUE	FALSE	FALSE	FALSE		Putative copper export protein	1650	549		Nocardioides sp. J54		COG1276	P	pfam04234 pfam05425		Yes	Yes
2509361380	8		PseJ35DRAFT_00014970	FALSE	FALSE	FALSE	FALSE		Putative copper export protein	930	309		Pseudoxanthomonas sp. J35		COG1276	P	pfam05425		No	Yes
2509372010	9		MescicDRAFT_00045210	TRUE	FALSE	FALSE	FALSE		Putative copper export protein	1695	564		Mesorhizobium ciceri CMG6		COG1276	P	pfam04234 pfam05425		No	Yes
2509390316	9		Rleg9DRAFT_4872	TRUE	FALSE	FALSE	FALSE		Putative copper export protein	1653	550		Rhizobium leguminosarum bv. trifolii WSM597				pfam04234 pfam05425		No	Yes
2509394686	9		Mesau_01760	TRUE	FALSE	FALSE	FALSE		Putative copper export protein	1635	544		Mesorhizobium australicum WSM2073		COG1276	P	pfam04234 pfam05425		No	Yes
2509442312	8		Rleg10DRAFT_0952	FALSE	FALSE	FALSE	FALSE		putative copper export protein	894	297		Rhizobium leguminosarum bv. trifolii WSM2012		COG1276	P	pfam05425		No	Yes
2509513646	4		BurcepDRAFT_0186	FALSE	FALSE	FALSE	FALSE		Predicted integral membrane protein	459	152		Burkholderia cepacia UCB 717, ATCC 25416		COG5615	S	pfam05425		No	Yes
2509516972	8		BurcepDRAFT_3513	FALSE	FALSE	FALSE	FALSE		Putative copper export protein	933	310		Burkholderia cepacia UCB 717, ATCC 25416		COG1276	P	pfam05425		No	Yes
2509517739	8		BurcepDRAFT_4281	FALSE	FALSE	FALSE	FALSE		Putative copper export protein	942	313		Burkholderia cepacia UCB 717, ATCC 25416		COG1276	P	pfam05425		No	Yes
2509534323	6		Rleg6DRAFT_3424	FALSE	FALSE	FALSE	FALSE		Putative copper export protein	765	254		Rhizobium leguminosarum bv trifolii CC278f		COG1276	P	pfam05425		No	Yes
2509541863	4		USA011_00022990	FALSE	FALSE	FALSE	FALSE		Predicted integral membrane protein	465	154		Pseudomonas syringae USA011 (USA011)		COG5615	S	pfam05425		No	Yes
2509545815	15		SacxiDRAFT_0772	FALSE	TRUE	FALSE	FALSE		Predicted membrane protein	2118	705		Saccharomonospora xinjiangensis XJ-54		COG3336	S	pfam05425 pfam09678		No	Yes
2509547046	9		SacxiDRAFT_2004	FALSE	FALSE	FALSE	FALSE		Putative copper export protein	1038	345		Saccharomonospora xinjiangensis XJ-54		COG1276	P	pfam05425		No	Yes
2509578720	4		Solca_2167	FALSE	FALSE	FALSE	FALSE		Putative copper export protein	450	149		Solitalea canadensis USAM 9D, DSM 3403				pfam05425		No	Yes
2509585860	7		Deiho_01575	FALSE	FALSE	FALSE	FALSE		Putative copper export protein	810	269		Deinococcus hopiensis KR-140, DSM 18049		COG1276	P	pfam05425		No	Yes
2509595361	8		Deipe_4375	TRUE	FALSE	FALSE	FALSE		Putative copper export protein	1923	640		Deinococcus peraridilitoris KR-200, DSM 19664		COG1276	P	pfam04234 pfam05425		No	Yes
2509604183	4		Ornrh_2220	FALSE	FALSE	FALSE	FALSE		putative copper export protein	435	144		Ornithobacterium rhinotracheale DSM 15997				pfam05425		No	Yes
2509717951	4		pf1112_00022110	FALSE	FALSE	FALSE	FALSE		Predicted integral membrane protein	465	154		Pseudomonas fluorescens 1112 (1112 version 1)		COG5615	S	pfam05425		No	Yes
2509719925	8		pf1112_00041880	FALSE	FALSE	FALSE	FALSE		Putative copper export protein	858	285		Pseudomonas fluorescens 1112 (1112 version 1)		COG1276	P	pfam05425		No	Yes
2509755642	8		IMCC3088_00008620	FALSE	FALSE	FALSE	FALSE		Putative copper export protein	894	297		gamma proteobacterium IMCC3088		COG1276	P	pfam05425		No	Yes
2509789043	9		ThesuDRAFT_0843	FALSE	FALSE	TRUE	FALSE		Putative copper export protein	1989	662		Thermaerobacter subterraneus C21, DSM 13965		COG1276	P	pfam05425 pfam13442		No	Yes
2509789528	4		ThesuDRAFT_1328	FALSE	FALSE	FALSE	FALSE		Predicted integral membrane protein	483	160		Thermaerobacter subterraneus C21, DSM 13965		COG5615	S	pfam05425		No	Yes
2509789680	4		ThesuDRAFT_1480	FALSE	FALSE	FALSE	FALSE		Copper resistance protein D.	468	155		Thermaerobacter subterraneus C21, DSM 13965				pfam05425		No	Yes
2509822217	8		Fraau_2861	FALSE	FALSE	FALSE	FALSE		Putative copper export protein	921	306		Frateuria aurantia Kondo 67, DSM 6220		COG1276	P	pfam05425		No	Yes
2509859343	16		JiagaDRAFT_0497	FALSE	TRUE	FALSE	FALSE		Predicted membrane protein	2007	668		Jiangella gansuensis YIM 002, DSM 44835		COG3336	S	pfam05425 pfam09678		No	Yes
2509875593	4		Syn6308DRAFT_2300	FALSE	FALSE	FALSE	FALSE		Putative copper export protein	447	148		Geminocystis herdmanii PCC 6308				pfam05425		No	Yes
2509884481	10		Natpe_1990	TRUE	FALSE	FALSE	FALSE		Putative copper export protein	1989	662		Natrinema pellirubrum 157, JCM 10476		COG1276	P	pfam04234 pfam05425		No	Yes
2510033711	16		FraQA3DRAFT_0639	FALSE	TRUE	FALSE	FALSE		putative membrane protein	2511	836		Frankia sp. QA3		COG3336	S	pfam05425 pfam09678		No	Yes
2510037861	8		FraQA3DRAFT_4790	TRUE	FALSE	FALSE	FALSE		putative copper export protein	1656	551		Frankia sp. QA3		COG1276	P	pfam04234 pfam05425		Yes	Yes
2510098999	4		Gei7105DRAFT_0249	FALSE	FALSE	FALSE	FALSE		Copper resistance protein D.	447	148		Geitlerinema sp. PCC 7105				pfam05425		No	Yes
2510152221	8		Ngar_c02840	TRUE	FALSE	FALSE	FALSE		streptogramin lyase	2922	973	arAOB	Candidatus Nitrososphaera gargensis Ga9-2		COG1276	P	pfam04234 pfam05425 pfam08450		No	Yes
2510152693	4		Ngar_c07580	FALSE	FALSE	FALSE	FALSE		putative copper resistance protein	495	164	arAOB	Candidatus Nitrososphaera gargensis Ga9-2				pfam05425		No	Yes
2510175666	8		PGA2_c08940	FALSE	FALSE	FALSE	FALSE		Putative copper export protein	849	282		Phaeobacter gallaeciensis 2.10		COG1276	P	pfam05425		No	Yes
2510230370	8		OCA5_c05190	FALSE	FALSE	FALSE	FALSE		putative copper resistance protein D	936	311		Oligotropha carboxidovorans OM5		COG1276	P	pfam05425		No	Yes
2510233407	8		OCA5_pOC16700280	FALSE	FALSE	FALSE	FALSE		putative copper resistance protein D	936	311		Oligotropha carboxidovorans OM5		COG1276	P	pfam05425		No	Yes
2510238115	8		RLO149_p830800	FALSE	FALSE	FALSE	FALSE		copper resistance-like protein	867	288		Roseobacter litoralis Och 149		COG1276	P	pfam05425		No	Yes
2510250353	4		Bur5005DRAFT_4281	FALSE	FALSE	FALSE	FALSE		Predicted integral membrane protein	459	152		Burkholderia sprentiae WSM5005		COG5615	S	pfam05425		No	Yes
2510252266	9		Bur5005DRAFT_6195	FALSE	FALSE	FALSE	FALSE		Putative copper export protein	930	309		Burkholderia sprentiae WSM5005		COG1276	P	pfam05425		No	Yes
2510255733	10		MetacDRAFT_2432	FALSE	FALSE	TRUE	FALSE		Putative copper export protein	2028	675	aMOB	Methylocapsa acidiphila B2		COG1276	P	pfam05425 pfam13442		No	Yes
2510256283	8		MetacDRAFT_2982	FALSE	FALSE	FALSE	FALSE		Putative copper export protein	1038	345	aMOB	Methylocapsa acidiphila B2		COG1276	P	pfam05425		No	Yes
2510283876	8		PseK12I1DRAFT_00030290	FALSE	FALSE	FALSE	FALSE		Putative copper export protein	897	298		Pseudomonas sp. MOIL14HWK12:I1		COG1276	P	pfam05425		No	Yes
2510285587	7		PsbVI21DRAFT_00000820	FALSE	FALSE	FALSE	FALSE		Putative copper export protein	912	303		Pseudomonas brassicacearum 51MFCVI2.1		COG1276	P	pfam05425		No	Yes
2510288162	5		PsbVI21DRAFT_00026600	FALSE	FALSE	FALSE	FALSE		Copper resistance protein D.	483	160		Pseudomonas brassicacearum 51MFCVI2.1				pfam05425		No	Yes
2510288448	4		PsbVI21DRAFT_00029460	FALSE	FALSE	FALSE	FALSE		Predicted integral membrane protein	465	154		Pseudomonas brassicacearum 51MFCVI2.1		COG5615	S	pfam05425		No	Yes
2510293450	8		PsK12I2DRAFT_00020370	FALSE	FALSE	FALSE	FALSE		Putative copper export protein	897	298		Pseudomonas sp. MOIL14HWK12:I2		COG1276	P	pfam05425		No	Yes
2510294327	8		PsK12I2DRAFT_00029140	FALSE	FALSE	FALSE	FALSE		Putative copper export protein	933	310		Pseudomonas sp. MOIL14HWK12:I2		COG1276	P	pfam05425		No	Yes
2510301835	9		SINM1775DRAFT_00057600	TRUE	FALSE	FALSE	FALSE		Putative copper export protein	1626	541		Ensifer meliloti CIAM1775		COG1276	P	pfam04234 pfam05425		No	Yes
2510307896	9		SINM1022DRAFT_00053050	TRUE	FALSE	FALSE	FALSE		Putative copper export protein	1626	541		Ensifer meliloti WSM1022		COG1276	P	pfam04234 pfam05425		No	Yes
2510312943	8		PsoK12DRAFT_00039530	FALSE	FALSE	FALSE	FALSE		Putative copper export protein	897	298		Pseudomonas oleovorans MOIL14HWK12		COG1276	P	pfam05425		No	Yes
2510318731	9		MESCI2DRAFT_00050870	TRUE	FALSE	FALSE	FALSE		Putative copper export protein	1698	565		Mesorhizobium ciceri WSM4083		COG1276	P	pfam04234 pfam05425		No	Yes
2510332441	9		ActroDRAFT_5692	TRUE	FALSE	FALSE	FALSE		Putative copper export protein	1761	586		Actinospica robiniae DSM 44927		COG1276	P	pfam04234 pfam05425		Yes	Yes
2510334972	9		ActroDRAFT_8223	TRUE	FALSE	FALSE	FALSE		Uncharacterized protein, homolog of Cu resistance protein CopC	1332	443		Actinospica robiniae DSM 44927		COG2372	R	pfam04234 pfam05425		Yes	Yes
2510335096	9		ActroDRAFT_8347	FALSE	FALSE	FALSE	FALSE		Putative copper export protein	1281	426		Actinospica robiniae DSM 44927		COG1276	P	pfam05425		No	Yes
2510377430	8		Rleg12_5761	FALSE	FALSE	FALSE	FALSE		Putative copper export protein	894	297		Rhizobium leguminosarum bv. trifolii CB782		COG1276	P	pfam05425		No	Yes
2510394380	9		PatmiDRAFT_0518	TRUE	FALSE	FALSE	FALSE		Putative copper export protein	2973	990		Patulibacter minatonensis KV-614, DSM 18081		COG1276	P	pfam04234 pfam05425		Yes	Yes
2510395947	8		PatmiDRAFT_2085	FALSE	FALSE	FALSE	FALSE		Putative copper export protein	2052	683		Patulibacter minatonensis KV-614, DSM 18081		COG1276	P	pfam05425		Yes	Yes
2510397733	9		PatmiDRAFT_3871	TRUE	FALSE	FALSE	FALSE		Putative copper export protein	1866	621		Patulibacter minatonensis KV-614, DSM 18081		COG1276	P	pfam04234 pfam05425		Yes	Yes
2510400178	9		CryarDRAFT_1213	TRUE	FALSE	FALSE	FALSE		Uncharacterized protein, homolog of Cu resistance protein CopC	1935	644		Cryptosporangium arvum YU 629-21, DSM 44712		COG2372	R	pfam04234 pfam05425		Yes	Yes
2510403886	16		CryarDRAFT_4921	FALSE	TRUE	FALSE	FALSE		Predicted membrane protein	2436	811		Cryptosporangium arvum YU 629-21, DSM 44712		COG3336	S	pfam05425 pfam09678		No	Yes
2510432220	8		RhIBUNDRAFT_00034730	FALSE	FALSE	FALSE	FALSE		Putative copper export protein	879	292		Rhizobium sp. IBUN		COG1276	P	pfam05425		No	Yes
2510434770	9		RhIBUNDRAFT_00060280	TRUE	FALSE	FALSE	FALSE		Putative copper export protein	1599	532		Rhizobium sp. IBUN		COG1276	P	pfam04234 pfam05425		Yes	Yes
2510444267	4		Acife_1802	FALSE	FALSE	FALSE	FALSE		Predicted integral membrane protein	483	160		Acidithiobacillus ferrivorans SS3		COG5615	S	pfam05425		No	Yes
2510457463	8			FALSE	FALSE	FALSE	FALSE		copper resistance protein, putative	1095	364		Acidithiobacillus sp. GGI-221		COG1276	P	pfam05425		No	Yes
2510463643	15		SacpaDRAFT_00026470	FALSE	TRUE	FALSE	FALSE		Predicted membrane protein	1974	657		Saccharomonospora paurometabolica YIM 90007		COG3336	S	pfam05425 pfam09678		No	Yes
2510538522	16		ARUE_c38750	FALSE	TRUE	FALSE	FALSE		Predicted membrane protein	2169	722		Arthrobacter nitroguajacolicus Rue61a		COG3336	S	pfam05425 pfam09678		Yes	Yes
2510539029	16		ARUE_232p00450	FALSE	TRUE	FALSE	FALSE		Predicted membrane protein	2109	702		Arthrobacter nitroguajacolicus Rue61a		COG3336	S	pfam05425 pfam09678		No	Yes
2510563388	4		NSS_00030490	FALSE	FALSE	FALSE	FALSE		Predicted integral membrane protein	450	149		Dechloromarinus chlorophilus NSS		COG5615	S	pfam05425		No	Yes
2510758989	7		OAN307_c37460	FALSE	FALSE	FALSE	FALSE		Putative copper export protein	888	295		Octadecabacter antarcticus 307		COG1276	P	pfam05425		No	Yes
2510788374	4			FALSE	FALSE	FALSE	FALSE		Predicted integral membrane protein	477	158		Acidithiobacillus thiooxidans ATCC 19377		COG5615	S	pfam05425		No	Yes
2511077043	4		PAK_00404	FALSE	FALSE	FALSE	FALSE		Predicted integral membrane protein	465	154		Pseudomonas aeruginosa PAK		COG5615	S	pfam05425		No	Yes
2511081032	4		PAK_04399	FALSE	FALSE	FALSE	FALSE		Putative copper export protein	435	144		Pseudomonas aeruginosa PAK				pfam05425		No	Yes
2511120602	8		PMI01_00395	FALSE	FALSE	FALSE	FALSE		Putative copper export protein	930	309		Caulobacter sp. AP07		COG1276	P	pfam05425		No	Yes
2511132176	8		PMI03_00928	FALSE	FALSE	FALSE	FALSE		Putative copper export protein	888	295		Rhizobium sp. AP16		COG1276	P	pfam05425		No	Yes
2511184278	9		PMI09_03040	TRUE	FALSE	FALSE	FALSE		Putative copper export protein	1593	530		Rhizobium sp. CF122		COG1276	P	pfam04234 pfam05425		No	Yes
2511185896	8		PMI09_04660	FALSE	FALSE	FALSE	FALSE		Putative copper export protein	879	292		Rhizobium sp. CF122		COG1276	P	pfam05425		No	Yes
2511195856	8		PMI11_02512	FALSE	FALSE	FALSE	FALSE		Putative copper export protein	888	295		Rhizobium sp. CF142		COG1276	P	pfam05425		No	Yes
2511198906	9		PMI11_05568	TRUE	FALSE	FALSE	FALSE		Putative copper export protein	1590	529		Rhizobium sp. CF142		COG1276	P	pfam04234 pfam05425		Yes	Yes
2511235755	4		PMI14_00573	FALSE	FALSE	FALSE	FALSE		Predicted integral membrane protein	468	155		Acidovorax sp. CF316		COG5615	S	pfam05425		No	Yes
2511244964	4		PMI15_02508	FALSE	FALSE	FALSE	FALSE		Predicted integral membrane protein	447	148		Polaromonas sp. CF318		COG5615	S	pfam05425		No	Yes
2511252389	4		PMI16_05045	FALSE	FALSE	FALSE	FALSE		Predicted integral membrane protein	453	150		Herbaspirillum sp. CF444		COG5615	S	pfam05425		No	Yes
2511257645	8		PMI18_05236	FALSE	FALSE	FALSE	FALSE		Putative copper export protein	924	307		Pseudomonas sp. GM102		COG1276	P	pfam05425		No	Yes
2511257925	4		PMI18_05516	FALSE	FALSE	FALSE	FALSE		Predicted integral membrane protein	465	154		Pseudomonas sp. GM102		COG5615	S	pfam05425		No	Yes
2511263765	8		PMI20_00838	FALSE	FALSE	FALSE	FALSE		Putative copper export protein	861	286		Pseudomonas sp. GM17		COG1276	P	pfam05425		No	Yes
2511264153	4		PMI20_01226	FALSE	FALSE	FALSE	FALSE		Predicted integral membrane protein	465	154		Pseudomonas sp. GM17		COG5615	S	pfam05425		No	Yes
2511266058	8		PMI20_03132	FALSE	FALSE	FALSE	FALSE		Putative copper export protein	915	304		Pseudomonas sp. GM17		COG1276	P	pfam05425		No	Yes
2511270297	8		PMI21_01179	FALSE	FALSE	FALSE	FALSE		Putative copper export protein	924	307		Pseudomonas sp. GM18		COG1276	P	pfam05425		No	Yes
2511270629	4		PMI21_01511	FALSE	FALSE	FALSE	FALSE		Predicted integral membrane protein	459	152		Pseudomonas sp. GM18		COG5615	S	pfam05425		No	Yes
2511271553	8		PMI21_02436	FALSE	FALSE	FALSE	FALSE		Putative copper export protein	861	286		Pseudomonas sp. GM18		COG1276	P	pfam05425		No	Yes
2511275579	8		PMI22_00664	FALSE	FALSE	FALSE	FALSE		Putative copper export protein	951	316		Pseudomonas sp. GM21		COG1276	P	pfam05425		No	Yes
2511279065	4		PMI22_04157	FALSE	FALSE	FALSE	FALSE		Predicted integral membrane protein	465	154		Pseudomonas sp. GM21		COG5615	S	pfam05425		No	Yes
2511288604	4		PMI24_01303	FALSE	FALSE	FALSE	FALSE		Predicted integral membrane protein	465	154		Pseudomonas sp. GM25		COG5615	S	pfam05425		No	Yes
2511289068	8		PMI24_01768	FALSE	FALSE	FALSE	FALSE		Putative copper export protein	858	285		Pseudomonas sp. GM25		COG1276	P	pfam05425		No	Yes
2511290679	7		PMI24_03381	FALSE	FALSE	FALSE	FALSE		Putative copper export protein	864	287		Pseudomonas sp. GM25		COG1276	P	pfam05425		No	Yes
2511296224	8		PMI25_03089	FALSE	FALSE	FALSE	FALSE		Putative copper export protein	858	285		Pseudomonas sp. GM30		COG1276	P	pfam05425		No	Yes
2511298207	4		PMI25_05076	FALSE	FALSE	FALSE	FALSE		Predicted integral membrane protein	465	154		Pseudomonas sp. GM30		COG5615	S	pfam05425		No	Yes
2511300037	4		PMI26_01203	FALSE	FALSE	FALSE	FALSE		Predicted integral membrane protein	465	154		Pseudomonas sp. GM33		COG5615	S	pfam05425		No	Yes
2511300326	8		PMI26_01492	FALSE	FALSE	FALSE	FALSE		Putative copper export protein	858	285		Pseudomonas sp. GM33		COG1276	P	pfam05425		No	Yes
2511303884	8		PMI26_05057	FALSE	FALSE	FALSE	FALSE		Putative copper export protein	924	307		Pseudomonas sp. GM33		COG1276	P	pfam05425		No	Yes
2511307240	8		PMI27_02230	FALSE	FALSE	FALSE	FALSE		Putative copper export protein	861	286		Pseudomonas sp. GM41(2012)		COG1276	P	pfam05425		No	Yes
2511307999	8		PMI27_02991	FALSE	FALSE	FALSE	FALSE		Putative copper export protein	936	311		Pseudomonas sp. GM41(2012)		COG1276	P	pfam05425		No	Yes
2511309397	4		PMI27_04391	FALSE	FALSE	FALSE	FALSE		Predicted integral membrane protein	465	154		Pseudomonas sp. GM41(2012)		COG5615	S	pfam05425		No	Yes
2511312666	8		PMI28_01505	FALSE	FALSE	FALSE	FALSE		Putative copper export protein	924	307		Pseudomonas sp. GM48		COG1276	P	pfam05425		No	Yes
2511314658	8		PMI28_03498	FALSE	FALSE	FALSE	FALSE		Putative copper export protein	858	285		Pseudomonas sp. GM48		COG1276	P	pfam05425		No	Yes
2511316743	4		PMI28_05586	FALSE	FALSE	FALSE	FALSE		Predicted integral membrane protein	465	154		Pseudomonas sp. GM48		COG5615	S	pfam05425		No	Yes
2511319532	4		PMI29_02396	FALSE	FALSE	FALSE	FALSE		Predicted integral membrane protein	465	154		Pseudomonas sp. GM49		COG5615	S	pfam05425		No	Yes
2511322820	8		PMI29_05688	FALSE	FALSE	FALSE	FALSE		Putative copper export protein	936	311		Pseudomonas sp. GM49		COG1276	P	pfam05425		No	Yes
2511322871	8		PMI29_05739	FALSE	FALSE	FALSE	FALSE		Putative copper export protein	858	285		Pseudomonas sp. GM49		COG1276	P	pfam05425		No	Yes
2511324049	4		PMI30_00572	FALSE	FALSE	FALSE	FALSE		Predicted integral membrane protein	465	154		Pseudomonas sp. GM50		COG5615	S	pfam05425		No	Yes
2511324743	8		PMI30_01266	FALSE	FALSE	FALSE	FALSE		Putative copper export protein	963	320		Pseudomonas sp. GM50		COG1276	P	pfam05425		No	Yes
2511326365	8		PMI30_02889	FALSE	FALSE	FALSE	FALSE		Putative copper export protein	846	281		Pseudomonas sp. GM50		COG1276	P	pfam05425		No	Yes
2511330194	4		PMI31_00566	FALSE	FALSE	FALSE	FALSE		Predicted integral membrane protein	465	154		Pseudomonas sp. GM55		COG5615	S	pfam05425		No	Yes
2511331391	8		PMI31_01764	FALSE	FALSE	FALSE	FALSE		Putative copper export protein	858	285		Pseudomonas sp. GM55		COG1276	P	pfam05425		No	Yes
2511335474	8		PMI31_05852	FALSE	FALSE	FALSE	FALSE		Putative copper export protein	924	307		Pseudomonas sp. GM55		COG1276	P	pfam05425		No	Yes
2511336165	8		PMI32_00467	FALSE	FALSE	FALSE	FALSE		Putative copper export protein	858	285		Pseudomonas sp. GM60		COG1276	P	pfam05425		No	Yes
2511338057	8		PMI32_02362	FALSE	FALSE	FALSE	FALSE		Putative copper export protein	936	311		Pseudomonas sp. GM60		COG1276	P	pfam05425		No	Yes
2511339709	4		PMI32_04015	FALSE	FALSE	FALSE	FALSE		Predicted integral membrane protein	465	154		Pseudomonas sp. GM60		COG5615	S	pfam05425		No	Yes
2511342250	8		PMI33_00562	FALSE	FALSE	FALSE	FALSE		Putative copper export protein	858	285		Pseudomonas sp. GM67		COG1276	P	pfam05425		No	Yes
2511342870	8		PMI33_01182	FALSE	FALSE	FALSE	FALSE		Putative copper export protein	936	311		Pseudomonas sp. GM67		COG1276	P	pfam05425		No	Yes
2511344907	4		PMI33_03225	FALSE	FALSE	FALSE	FALSE		Predicted integral membrane protein	465	154		Pseudomonas sp. GM67		COG5615	S	pfam05425		No	Yes
2511348471	8		PMI34_00696	FALSE	FALSE	FALSE	FALSE		Putative copper export protein	858	285		Pseudomonas sp. GM74		COG1276	P	pfam05425		No	Yes
2511349723	7		PMI34_01950	FALSE	FALSE	FALSE	FALSE		Putative copper export protein	924	307		Pseudomonas sp. GM74		COG1276	P	pfam05425		No	Yes
2511351739	4		PMI34_03971	FALSE	FALSE	FALSE	FALSE		Predicted integral membrane protein	465	154		Pseudomonas sp. GM74		COG5615	S	pfam05425		No	Yes
2511355147	4		PMI35_01723	FALSE	FALSE	FALSE	FALSE		Predicted integral membrane protein	465	154		Pseudomonas sp. GM78		COG5615	S	pfam05425		No	Yes
2511363752	4		PMI36_03530	FALSE	FALSE	FALSE	FALSE		Predicted integral membrane protein	465	154		Pseudomonas sp. GM79		COG5615	S	pfam05425		No	Yes
2511365937	8		PMI36_05718	FALSE	FALSE	FALSE	FALSE		Putative copper export protein	930	309		Pseudomonas sp. GM79		COG1276	P	pfam05425		No	Yes
2511369329	8		PMI37_02959	FALSE	FALSE	FALSE	FALSE		Putative copper export protein	858	285		Pseudomonas sp. GM80		COG1276	P	pfam05425		No	Yes
2511371001	4		PMI37_04633	FALSE	FALSE	FALSE	FALSE		Predicted integral membrane protein	465	154		Pseudomonas sp. GM80		COG5615	S	pfam05425		No	Yes
2511373403	4		PMI38_00697	FALSE	FALSE	FALSE	FALSE		Predicted integral membrane protein	465	154		Pseudomonas sp. GM84		COG5615	S	pfam05425		No	Yes
2511382918	8		PMI39_04843	FALSE	FALSE	FALSE	FALSE		Putative copper export protein	882	293		Pantoea sp. YR343		COG1276	P	pfam05425		No	Yes
2511385204	4		PMI40_02123	FALSE	FALSE	FALSE	FALSE		Predicted integral membrane protein	450	149		Herbaspirillum sp. YR522		COG5615	S	pfam05425		No	Yes
2511394169	9		PMI42_01090	TRUE	FALSE	FALSE	FALSE		Putative copper export protein	1563	520		Bradyrhizobium sp. YR681		COG1276	P	pfam04234 pfam05425		Yes	Yes
2511414048	8		PMI19_03468	FALSE	FALSE	FALSE	FALSE		Putative copper export protein	858	285		Pseudomonas sp. GM16		COG1276	P	pfam05425		No	Yes
2511414250	7		PMI19_03671	FALSE	FALSE	FALSE	FALSE		Putative copper export protein	870	289		Pseudomonas sp. GM16		COG1276	P	pfam05425		No	Yes
2511415668	4		PMI19_05093	FALSE	FALSE	FALSE	FALSE		Predicted integral membrane protein	465	154		Pseudomonas sp. GM16		COG5615	S	pfam05425		No	Yes
2511418867	4		PMI23_02308	FALSE	FALSE	FALSE	FALSE		Predicted integral membrane protein	465	154		Pseudomonas sp. GM24		COG5615	S	pfam05425		No	Yes
2511421905	7		PMI23_05354	FALSE	FALSE	FALSE	FALSE		Putative copper export protein	870	289		Pseudomonas sp. GM24		COG1276	P	pfam05425		No	Yes
2511422211	8		PMI23_05660	FALSE	FALSE	FALSE	FALSE		Putative copper export protein	858	285		Pseudomonas sp. GM24		COG1276	P	pfam05425		No	Yes
2511435081	8		PMI17_02404	FALSE	FALSE	FALSE	FALSE		Putative copper export protein	882	293		Pantoea sp. GM01		COG1276	P	pfam05425		No	Yes
2511499718	9		SinAK58DRAFT_2975	TRUE	FALSE	FALSE	FALSE		Putative copper export protein	1626	541		Ensifer meliloti AK58		COG1276	P	pfam04234 pfam05425		No	Yes
2511510063	8		SLG_p_00870	FALSE	FALSE	FALSE	FALSE		copper resistance protein CopD	945	314		Sphingobium sp. SYK-6		COG1276	P	pfam05425		No	Yes
2511521651	16		CDHC03_1716	FALSE	TRUE	FALSE	FALSE		Predicted membrane protein	2037	678		Corynebacterium diphtheriae HC03		COG3336	S	pfam05425 pfam09678		No	Yes
2511531691	9		GYO_0612	TRUE	FALSE	FALSE	TRUE		Putative copper export protein	1626	541		Bacillus subtilis spizizenii TU-B-10, DSM 15029		COG1276	P	pfam04234 pfam05425 pfam13115		Yes	Yes
2511544021	16		Cp3995_1671	FALSE	TRUE	FALSE	FALSE		Copper resistance D domain-containing protein/Cytochrome c oxidase caa3 assembly factor (Caa3_CtaG)	2046	681		Corynebacterium pseudotuberculosis 3/99-5		COG3336	S	pfam05425 pfam09678		No	Yes
2511546022	3		HAH_1114	FALSE	FALSE	FALSE	FALSE		Copper resistance protein D	453	150		Haloarcula hispanica CGMCC 1.2049				pfam05425		No	Yes
2511547421	4		HAH_2517	FALSE	FALSE	FALSE	FALSE		Predicted integral membrane protein	432	143		Haloarcula hispanica CGMCC 1.2049		COG5615	S	pfam05425		No	Yes
2511551052	16		TBSG_00103	FALSE	TRUE	FALSE	FALSE		Predicted membrane protein	1986	661		Mycobacterium tuberculosis KZN 4207 (DS)		COG3336	S	pfam05425 pfam09678		No	Yes
2511564121	16		CD31A_1808	FALSE	TRUE	FALSE	FALSE		Predicted membrane protein	2037	678		Corynebacterium diphtheriae 31A		COG3336	S	pfam05425 pfam09678		No	Yes
2511572080	9		HPL003_09710	TRUE	FALSE	FALSE	FALSE		copper resistance protein	1722	573		Paenibacillus terrae HPL-003		COG1276	P	pfam04234 pfam05425		Yes	Yes
2511581370	9		BCN_1830	TRUE	FALSE	FALSE	TRUE		Putative copper export protein	1635	544		Bacillus cereus NC7401		COG1276	P	pfam04234 pfam05425 pfam13115		Yes	Yes
2511588052	16		CDHC01_1739	FALSE	TRUE	FALSE	FALSE		Predicted membrane protein	2037	678		Corynebacterium diphtheriae HC01		COG3336	S	pfam05425 pfam09678		No	Yes
2511590347	16		CDHC04_1712	FALSE	TRUE	FALSE	FALSE		Predicted membrane protein	2037	678		Corynebacterium diphtheriae HC04		COG3336	S	pfam05425 pfam09678		No	Yes
2511598974	9		KSE_41000	TRUE	FALSE	FALSE	FALSE		putative copper resistance protein	2019	672		Kitasatospora setae KM-6054, NBRC 14216		COG2372	R	pfam04234 pfam05425 pfam05751		Yes	Yes
2511607618	16		CDB402_1693	FALSE	TRUE	FALSE	FALSE		Predicted membrane protein	2037	678		Corynebacterium diphtheriae INCA 402		COG3336	S	pfam05425 pfam09678		No	Yes
2511610015	16		CDC7B_1788	FALSE	TRUE	FALSE	FALSE		Predicted membrane protein	2037	678		Corynebacterium diphtheriae C7 (beta)		COG3336	S	pfam05425 pfam09678		No	Yes
2511615663	16		CDHC02_1733	FALSE	TRUE	FALSE	FALSE		Predicted membrane protein	2037	678		Corynebacterium diphtheriae HC02		COG3336	S	pfam05425 pfam09678		No	Yes
2511631598	4		NH8B_3199	FALSE	FALSE	FALSE	FALSE		copper resistance protein D	462	153		Pseudogulbenkiania sp. NH8B		COG5615	S	pfam05425		No	Yes
2511643891	9		LIV_2045	TRUE	FALSE	FALSE	FALSE		putative copper export protein	1629	542		Listeria ivanovii ivanovii PAM 55		COG1276	P	pfam04234 pfam05425		No	Yes
2511646499	16		CDBH8_1778	FALSE	TRUE	FALSE	FALSE		Predicted membrane protein	2037	678		Corynebacterium diphtheriae BH8		COG3336	S	pfam05425 pfam09678		No	Yes
2511666798	16		CDVA01_1677	FALSE	TRUE	FALSE	FALSE		Predicted membrane protein	2037	678		Corynebacterium diphtheriae VA01		COG3336	S	pfam05425 pfam09678		No	Yes
2511676600	16		CDPW8_1798	FALSE	TRUE	FALSE	FALSE		Predicted membrane protein	2037	678		Corynebacterium diphtheriae PW8		COG3336	S	pfam05425 pfam09678		No	Yes
2511680509	7		SCAT_2729	TRUE	FALSE	FALSE	FALSE		Copper resistance protein CopC	1965	654		Streptomyces cattleya NRRL 8057		COG2372	R	pfam04234 pfam05425		No	Yes
2511680807	8		SCAT_3018	TRUE	FALSE	FALSE	FALSE		Uncharacterized protein, homolog of Cu resistance protein CopC	1866	621		Streptomyces cattleya NRRL 8057		COG2372	R	pfam04234 pfam05425		Yes	Yes
2511686192	16		CVAR_0800	FALSE	TRUE	FALSE	FALSE		Predicted membrane protein	2145	714		Corynebacterium variabile DSM 44702		COG3336	S	pfam05425 pfam09678		No	Yes
2511690225	16		CDCE8392_1700	FALSE	TRUE	FALSE	FALSE		Predicted membrane protein	2037	678		Corynebacterium diphtheriae CDCE 8392		COG3336	S	pfam05425 pfam09678		No	Yes
2511698267	9		BACAU_0356	TRUE	FALSE	FALSE	TRUE		Putative copper export protein	1629	542		Bacillus amyloliquefaciens CAU-B946		COG1276	P	pfam04234 pfam05425 pfam13115		Yes	Yes
2511711344	4		FCOL_10575	FALSE	FALSE	FALSE	FALSE		Copper resistance protein D	444	147		Flavobacterium columnare ATCC 49512				pfam05425		No	Yes
2511719032	8		KOX_23810	FALSE	FALSE	FALSE	FALSE		putative copper resistance protein D	870	289		Klebsiella oxytoca KCTC 1686		COG1276	P	pfam05425		No	Yes
2511723898	16		CD241_1737	FALSE	TRUE	FALSE	FALSE		Predicted membrane protein	2037	678		Corynebacterium diphtheriae 241		COG3336	S	pfam05425 pfam09678		No	Yes
2511734483	16		MTCTRI2_0105	FALSE	TRUE	FALSE	FALSE		integral membrane protein	1986	661		Mycobacterium tuberculosis CTRI-2		COG3336	S	pfam05425 pfam09678		No	Yes
2511740676	8		ECO55CA74_11020	FALSE	FALSE	FALSE	FALSE		copper resistance protein D	873	290		Escherichia coli O55:H7 RM12579		COG1276	P	pfam05425		No	Yes
2511773790	8		TC41_2921	TRUE	FALSE	FALSE	FALSE		copper resistance protein CopC	1602	533		Alicyclobacillus acidocaldarius acidocaldarius Tc-4-1		COG2372	R	pfam04234 pfam05425		Yes	Yes
2511775800	16		Cp106_1587	FALSE	TRUE	FALSE	FALSE		Copper resistance D domain-containing protein/Cytochrome c oxidase caa3 assembly factor (Caa3_CtaG)	2046	681		Corynebacterium pseudotuberculosis 1/06-A		COG3336	S	pfam05425 pfam09678		No	Yes
2511780393	8		BYI23_A004210	FALSE	FALSE	FALSE	FALSE		copper resistance D domain protein	933	310		Burkholderia sp. YI23		COG1276	P	pfam05425		No	Yes
2511780760	4		BYI23_A007790	FALSE	FALSE	FALSE	FALSE		Predicted integral membrane protein	459	152		Burkholderia sp. YI23		COG5615	S	pfam05425		No	Yes
2511789589	8		A1122_16935	FALSE	FALSE	FALSE	FALSE		putative copper resistance protein D	885	294		Yersinia pestis A1122		COG1276	P	pfam05425		No	Yes
2511802288	9		ACPL_1190	TRUE	FALSE	FALSE	FALSE		Putative copper export protein	1662	553		Actinoplanes sp. SE50/110		COG1276	P	pfam04234 pfam05425		Yes	Yes
2511803986	8		ACPL_2871	TRUE	FALSE	FALSE	FALSE		Putative copper export protein	1620	539		Actinoplanes sp. SE50/110		COG1276	P	pfam04234 pfam05425		Yes	Yes
2511809683	16		BCGMEX_0106	FALSE	TRUE	FALSE	FALSE		Putative integral membrane protein	1986	661		Mycobacterium bovis BCG Mexico		COG3336	S	pfam05425 pfam09678		No	Yes
2511815281	16		CpCIP5297_1640	FALSE	TRUE	FALSE	FALSE		Copper resistance D domain-containing protein/Cytochrome c oxidase caa3 assembly factor (Caa3_CtaG)	2046	681		Corynebacterium pseudotuberculosis CIP52.97		COG3336	S	pfam05425 pfam09678		No	Yes
2511817492	16		CpPAT10_1627	FALSE	TRUE	FALSE	FALSE		Copper resistance D domain-containing protein/Cytochrome c oxidase caa3 assembly factor (Caa3_CtaG)	2046	681		Corynebacterium pseudotuberculosis PAT10		COG3336	S	pfam05425 pfam09678		No	Yes
2511823226	4		PSF113_1237	FALSE	FALSE	FALSE	FALSE		membrane protein	465	154		Pseudomonas fluorescens F113		COG5615	S	pfam05425		No	Yes
2511826595	8		PSF113_4602	FALSE	FALSE	FALSE	FALSE		CopD	912	303		Pseudomonas fluorescens F113		COG1276	P	pfam05425		No	Yes
2511836489	8		PAGR_g1912	FALSE	FALSE	FALSE	FALSE		Copper resistance protein D	876	291		Pantoea ananatis PA13		COG1276	P	pfam05425		No	Yes
2511841173	7		BMWSH_2200	FALSE	FALSE	FALSE	FALSE		Copper resistance protein D	783	260		Bacillus megaterium WSH-002				pfam05425		No	Yes
2511850301	8		STBHUCCB_10740	FALSE	FALSE	FALSE	FALSE		Inner membrane protein yebZ	876	291		Salmonella enterica enterica sv. Typhi P-stx-12		COG1276	P	pfam05425		No	Yes
2511855097	4		NCGM2_0981	FALSE	FALSE	FALSE	FALSE		Copper resistance protein D	435	144		Pseudomonas aeruginosa NCGM2.S1				pfam05425		No	Yes
2511856021	4		NCGM2_1905	FALSE	FALSE	FALSE	FALSE		Predicted integral membrane protein	465	154		Pseudomonas aeruginosa NCGM2.S1		COG5615	S	pfam05425		No	Yes
2511871901	8		i14_2068	FALSE	FALSE	FALSE	FALSE		Putative copper export protein	873	290		Escherichia coli clone D i14		COG1276	P	pfam05425		No	Yes
2511877567	9		NOCYR_0072	FALSE	FALSE	FALSE	FALSE		16.8 : Protect	927	308		Nocardia cyriacigeorgica GUH-2		COG1276	P	pfam05425		No	Yes
2511878805	16		NOCYR_1313	FALSE	TRUE	FALSE	FALSE		15.5 : Detoxification	2040	679		Nocardia cyriacigeorgica GUH-2		COG3336	S	pfam05425 pfam09678		No	Yes
2511883505	9		I33_0452	TRUE	FALSE	FALSE	TRUE		YcnJ	1626	541		Bacillus subtilis subtilis RO-NN-1		COG1276	P	pfam04234 pfam05425 pfam13115		Yes	Yes
2511889384	9		LMRG_01212	TRUE	FALSE	FALSE	FALSE		Putative copper export protein	1626	541		Listeria monocytogenes 10403S		COG1276	P	pfam04234 pfam05425		Yes	Yes
2511903921	8		PANA5342_1981	FALSE	FALSE	FALSE	FALSE		Putative copper export protein	876	291		Pantoea ananatis LMG 5342		COG1276	P	pfam05425		No	Yes
2511910564	9		BAXH7_00381	TRUE	FALSE	FALSE	TRUE		putative copper export protein	1629	542		Bacillus amyloliquefaciens XH7		COG1276	P	pfam04234 pfam05425 pfam13115		Yes	Yes
2511914544	9		RAM_00465	FALSE	FALSE	FALSE	FALSE		putative copper resistance protein D	1029	342		Amycolatopsis mediterranei S699, ATCC 13685		COG1276	P	pfam05425		No	Yes
2511918792	8		RAM_21650	FALSE	FALSE	FALSE	FALSE		copper resistance protein	924	307		Amycolatopsis mediterranei S699, ATCC 13685		COG1276	P	pfam05425		No	Yes
2511921481	16		RAM_35050	FALSE	TRUE	FALSE	FALSE		copper resistance protein D	2010	669		Amycolatopsis mediterranei S699, ATCC 13685		COG3336	S	pfam05425 pfam09678		No	Yes
2511921544	9		RAM_35360	TRUE	FALSE	FALSE	FALSE		copper resistance protein	1104	367		Amycolatopsis mediterranei S699, ATCC 13685		COG1276	P	pfam04234 pfam05425		No	Yes
2511930350	4		PAM18_4001	FALSE	FALSE	FALSE	FALSE		Predicted integral membrane protein	465	154		Pseudomonas aeruginosa M18		COG5615	S	pfam05425		No	Yes
2511931071	4		PAM18_4704	FALSE	FALSE	FALSE	FALSE		Copper resistance protein D	435	144		Pseudomonas aeruginosa M18				pfam05425		No	Yes
2511934240	9		LMKG_00261	TRUE	FALSE	FALSE	FALSE		copper resistance domain-containing protein	1626	541		Listeria monocytogenes FSL R2-561		COG1276	P	pfam04234 pfam05425		No	Yes
2511949990	9		LMOG_01165	TRUE	FALSE	FALSE	FALSE		copper resistance domain-containing protein	1626	541		Listeria monocytogenes J0161, FSL R2-499		COG1276	P	pfam04234 pfam05425		Yes	Yes
2511966452	8		i02_2068	FALSE	FALSE	FALSE	FALSE		Putative copper export protein	873	290		Escherichia coli clone D i2		COG1276	P	pfam05425		No	Yes
2511972983	8		KPHS_33740	FALSE	FALSE	FALSE	FALSE		putative resistance protein	870	289		Klebsiella pneumoniae pneumoniae HS11286		COG1276	P	pfam05425		No	Yes
2511979785	6		SCATT_27160	TRUE	FALSE	FALSE	FALSE		copper resistance protein CopC	1896	631		Streptomyces cattleya DSM 46488		COG2372	R	pfam04234 pfam05425		Yes	Yes
2511980085	8		SCATT_30090	TRUE	FALSE	FALSE	FALSE		Uncharacterized protein, homolog of Cu resistance protein CopC	1866	621		Streptomyces cattleya DSM 46488		COG2372	R	pfam04234 pfam05425		Yes	Yes
2511990001	9		LMLG_0366	TRUE	FALSE	FALSE	FALSE		copper resistance domain-containing protein	1626	541		Listeria monocytogenes Finland 1988		COG1276	P	pfam04234 pfam05425		No	Yes
2512000337	9		BJ6T_48230	TRUE	FALSE	FALSE	FALSE		possible Copper export protein	1563	520		Bradyrhizobium japonicum USDA 6		COG1276	P	pfam04234 pfam05425		Yes	Yes
2512002603	14		BJ6T_70890	FALSE	FALSE	FALSE	FALSE		Putative copper export protein	1656	551		Bradyrhizobium japonicum USDA 6		COG1276	P	pfam05425		No	Yes
2512014612	16		Cp4202_1617	FALSE	TRUE	FALSE	FALSE		Copper resistance D domain-containing protein/Cytochrome c oxidase caa3 assembly factor (Caa3_CtaG)	2046	681		Corynebacterium pseudotuberculosis 42/02-A		COG3336	S	pfam05425 pfam09678		No	Yes
2512023318	8		SPUL_1758	FALSE	FALSE	FALSE	FALSE		putative cation transporter	876	291		Salmonella enterica enterica sv. Gallinarum RKS5078		COG1276	P	pfam05425		No	Yes
2512038574	9		AZOBR_10274	TRUE	FALSE	FALSE	FALSE		16.1 : Circulate	1620	539		Azospirillum brasilense Sp245		COG1276	P	pfam04234 pfam05425		Yes	Yes
2512067563	9		Sm8Draft_00143	FALSE	FALSE	FALSE	FALSE		Putative copper export protein	1083	360		Streptomyces sp. SM8 (StrepSM8)		COG1276	P	pfam05425		No	Yes
2512073805	8		Sm8Draft_06405	TRUE	FALSE	FALSE	FALSE		Putative copper export protein	2097	698		Streptomyces sp. SM8 (StrepSM8)		COG1276	P	pfam04234 pfam05425		Yes	Yes
2512323736	8		MOK_00289	FALSE	FALSE	FALSE	FALSE		Putative copper export protein	915	304		Pseudomonas chlororaphis chlororaphis GP72 (Draft1)		COG1276	P	pfam05425		No	Yes
2512326352	4		MOK_02909	FALSE	FALSE	FALSE	FALSE		Predicted integral membrane protein	465	154		Pseudomonas chlororaphis chlororaphis GP72 (Draft1)		COG5615	S	pfam05425		No	Yes
2512327041	8		MOK_03598	FALSE	FALSE	FALSE	FALSE		Putative copper export protein	864	287		Pseudomonas chlororaphis chlororaphis GP72 (Draft1)		COG1276	P	pfam05425		No	Yes
2512344812	8		GCWU001488_00194	FALSE	FALSE	FALSE	FALSE		Putative copper export protein	930	309		Burkholderia tuberum STM678 (Burkholderia tuberum STM678T (IHQD assembly))		COG1276	P	pfam05425		No	Yes
2512346663	8		GCWU001488_02048	FALSE	FALSE	FALSE	FALSE		Putative copper export protein	906	301		Burkholderia tuberum STM678 (Burkholderia tuberum STM678T (IHQD assembly))		COG1276	P	pfam05425		No	Yes
2512347878	4		GCWU001488_03269	FALSE	FALSE	FALSE	FALSE		Predicted integral membrane protein	459	152		Burkholderia tuberum STM678 (Burkholderia tuberum STM678T (IHQD assembly))		COG5615	S	pfam05425		No	Yes
2512350866	2		GCWU001488_06262	FALSE	FALSE	FALSE	FALSE		Copper resistance protein D.	282	93		Burkholderia tuberum STM678 (Burkholderia tuberum STM678T (IHQD assembly))				pfam05425		No	Yes
2512363832	7		SL003B_2566	TRUE	FALSE	FALSE	FALSE		Copper resistance protein CopC	1578	525		Polymorphum gilvum SL003B-26A1		COG1276	P	pfam04234 pfam05425		No	Yes
2512372688	7		DSC_03670	FALSE	FALSE	FALSE	FALSE		putative transmembrane transporter protein	945	314		Pseudoxanthomonas spadix BD-a59		COG1276	P	pfam05425		No	Yes
2512386096	8		CE10_2125	FALSE	FALSE	FALSE	FALSE		inner membrane protein	873	290		Escherichia coli O7:K1 CE10		COG1276	P	pfam05425		No	Yes
2512437484	8		GOALK_048_00910	FALSE	FALSE	FALSE	FALSE		Putative copper export protein	879	292		Gordonia alkanivorans NBRC 16433		COG1276	P	pfam05425		No	Yes
2512439330	16		GOALK_095_00420	FALSE	TRUE	FALSE	FALSE		Predicted membrane protein	2025	674		Gordonia alkanivorans NBRC 16433		COG3336	S	pfam05425 pfam09678		No	Yes
2512446753	8		A28LD_1815	FALSE	FALSE	FALSE	FALSE		putative copper export protein	873	290		Idiomarina sp. A28L		COG1276	P	pfam05425		No	Yes
2512469721	10		HMPREF9372_3682	FALSE	FALSE	FALSE	FALSE		copper resistance protein D	1095	364		Sporosarcina newyorkensis 2681		COG1276	P	pfam05425		No	Yes
2512469775	9		HMPREF9372_3736	FALSE	FALSE	FALSE	FALSE		copper resistance protein D	1095	364		Sporosarcina newyorkensis 2681		COG1276	P	pfam05425		No	Yes
2512530692	9		SinarDRAFT_2130	TRUE	FALSE	FALSE	FALSE		Putative copper export protein	1626	541		Ensifer arboris LMG 14919		COG1276	P	pfam04234 pfam05425		No	Yes
2512590095	4		Q7A_2256	FALSE	FALSE	FALSE	FALSE		putative exported protein	453	150		Methylophaga nitratireducens JAM1		COG5615	S	pfam05425		No	Yes
2512593402	4		Q7C_2460	FALSE	FALSE	FALSE	FALSE		putative integral membrane protein	462	153		Methylophaga frappieri JAM7		COG5615	S	pfam05425		No	Yes
2512597506	7		OA238_c38080	FALSE	FALSE	FALSE	FALSE		copper resistance protein D-like protein	948	315		Octadecabacter arcticus 238, DSM 13978		COG1276	P	pfam05425		No	Yes
2512621247	16		AmythDRAFT_3942	FALSE	TRUE	FALSE	FALSE		Predicted membrane protein	2010	669		Amycolatopsis thermoflava N1165, DSM 44574		COG3336	S	pfam05425 pfam09678		No	Yes
2512622890	9		AmythDRAFT_5586	TRUE	FALSE	FALSE	FALSE		Putative copper export protein	1773	590		Amycolatopsis thermoflava N1165, DSM 44574		COG1276	P	pfam04234 pfam05425		Yes	Yes
2512623016	9		AmythDRAFT_5712	FALSE	FALSE	FALSE	FALSE		Putative copper export protein	1026	341		Amycolatopsis thermoflava N1165, DSM 44574		COG1276	P	pfam05425		No	Yes
2512626480	9		AmyhaDRAFT_0541	FALSE	FALSE	FALSE	FALSE		Putative copper export protein	1119	372		Amycolatopsis halophila YIM 93223, DSM 45216		COG1276	P	pfam05425		No	Yes
2512628782	7		AmyhaDRAFT_2843	FALSE	FALSE	FALSE	FALSE		Putative copper export protein	936	311		Amycolatopsis halophila YIM 93223, DSM 45216		COG1276	P	pfam05425		No	Yes
2512630259	16		AmyhaDRAFT_4320	FALSE	TRUE	FALSE	FALSE		Predicted membrane protein	1971	656		Amycolatopsis halophila YIM 93223, DSM 45216		COG3336	S	pfam05425 pfam09678		Yes	Yes
2512712943	9		BLASA_0706	TRUE	FALSE	FALSE	FALSE		15.10 : Adaptations to atypical conditions	1758	585		Blastococcus saxobsidens DD2		COG1276	P	pfam04234 pfam05425		Yes	Yes
2512713301	9		BLASA_1071	TRUE	FALSE	FALSE	FALSE		15.5 : Detoxification	1776	591		Blastococcus saxobsidens DD2		COG2372	R	pfam04234 pfam05425		Yes	Yes
2512714090	16		BLASA_1881	FALSE	TRUE	FALSE	FALSE		Predicted membrane protein	1968	655		Blastococcus saxobsidens DD2		COG3336	S	pfam05425 pfam09678		No	Yes
2512714868	9		BLASA_2687	FALSE	FALSE	FALSE	FALSE		7.4 : Cations and iron carrying compounds	1410	469		Blastococcus saxobsidens DD2		COG1276	P	pfam05425		No	Yes
2512722026	16		Cp316_1669	FALSE	TRUE	FALSE	FALSE		Copper resistance D domain-containing protein/Cytochrome c oxidase caa3 assembly factor (Caa3_CtaG)	2046	681		Corynebacterium pseudotuberculosis 316		COG3336	S	pfam05425 pfam09678		No	Yes
2512735909	9		PM3016_6460	TRUE	FALSE	FALSE	FALSE		Uncharacterized protein, homolog of Cu resistance protein CopC	1659	552		Paenibacillus mucilaginosus 3016		COG2372	R	pfam04234 pfam05425		Yes	Yes
2512739871	16		OCQ_15170	FALSE	TRUE	FALSE	FALSE		Predicted membrane protein	2064	687		Mycobacterium intracellulare MOTT-64		COG3336	S	pfam05425 pfam09678		No	Yes
2512747256	9		GPOL_c36390	TRUE	FALSE	FALSE	FALSE		putative copper uptake protein	1677	558		Gordonia polyisoprenivorans VH2, DSM 44266		COG2372	R	pfam04234 pfam05425		Yes	Yes
2512768299	16		OCO_17570	FALSE	TRUE	FALSE	FALSE		Predicted membrane protein	2064	687		Mycobacterium intracellulare MOTT-02		COG3336	S	pfam05425 pfam09678		No	Yes
2512785375	16		UDA_0102	FALSE	TRUE	FALSE	FALSE		Predicted membrane protein	1986	661		Mycobacterium tuberculosis UT205		COG3336	S	pfam05425 pfam09678		No	Yes
2512791697	16		CpP54B96_1655	FALSE	TRUE	FALSE	FALSE		Copper resistance D domain-containing protein/Cytochrome c oxidase caa3 assembly factor (Caa3_CtaG)	2046	681		Corynebacterium pseudotuberculosis P54B96		COG3336	S	pfam05425 pfam09678		No	Yes
2512804235	7		UMN798_1974	FALSE	FALSE	FALSE	FALSE		putative cation transporter	825	274		Salmonella enterica enterica sv. Typhimurium 798		COG1276	P	pfam05425		No	Yes
2512812361	8		DGo_PA0045	FALSE	FALSE	FALSE	FALSE		Putative copper export protein	801	266		Deinococcus gobiensis I-0, DSM 21396		COG1276	P	pfam05425		No	Yes
2512843273	4		Pcal_05859	FALSE	FALSE	FALSE	FALSE		Predicted integral membrane protein	465	154		Pseudomonas cannabina pv. alisalensis PSa866 (Draft assemply with Ion Torrent)		COG5615	S	pfam05425		No	Yes
2512850822	4		Pcal_04972	FALSE	FALSE	FALSE	FALSE		Predicted integral membrane protein	465	154		Pseudomonas cannabina pv. alisalensis PSa1-3 (Draft assemply with Ion Torrent)		COG5615	S	pfam05425		No	Yes
2512917790	4		Theru_0228	FALSE	FALSE	FALSE	FALSE		Copper resistance protein D.	405	134		Thermocrinis ruber OC 14/7/2, DSM 23557				pfam05425		No	Yes
2512926264	9		SacsacDRAFT_2911	TRUE	FALSE	FALSE	FALSE		Putative copper export protein	1653	550		Saccharibacillus sacchari GR21, DSM 19268		COG1276	P	pfam04234 pfam05425		Yes	Yes
2512932821	9		MesloDRAFT_4086	TRUE	FALSE	FALSE	FALSE		Putative copper export protein	1614	537		Mesorhizobium loti R7A		COG1276	P	pfam04234 pfam05425		Yes	Yes
2512960842	9		Meslo2DRAFT_3015	TRUE	FALSE	FALSE	FALSE		Putative copper export protein	1638	545		Mesorhizobium loti R88b		COG1276	P	pfam04234 pfam05425		No	Yes
2512963830	8		Meslo2DRAFT_6003	FALSE	FALSE	FALSE	FALSE		Putative copper export protein	891	296		Mesorhizobium loti R88b		COG1276	P	pfam05425		No	Yes
2513006893	8		THIPADRAFT_2476	FALSE	FALSE	FALSE	FALSE		Putative copper export protein	1170	389		Thioalkalivibrio paradoxus ARh 1		COG1276	P	pfam05425		No	Yes
2513100365	8		EBL_c17240	FALSE	FALSE	FALSE	FALSE		copper resistance D domain protein	873	290		Shimwellia blattae DSM 4481		COG1276	P	pfam05425		No	Yes
2513187146	9		NitalDRAFT_0854	TRUE	FALSE	FALSE	FALSE		Putative copper export protein	1818	605		Nitriliruptor alkaliphilus DSM 45188		COG1276	P	pfam04234 pfam05425		Yes	Yes
2513197929	4		PORcurated_01597	FALSE	FALSE	FALSE	FALSE		Predicted integral membrane protein	465	154		Pseudomonas syringae pv. oryzae 1_6 (Curated version without duplicated contigs)		COG5615	S	pfam05425		No	Yes
2513228858	4		PMI12_02495	FALSE	FALSE	FALSE	FALSE		Predicted integral membrane protein	459	152		Variovorax sp. CF313		COG5615	S	pfam05425		No	Yes
2513234484	4		PMI10_02388	FALSE	FALSE	FALSE	FALSE		Putative copper export protein	450	149		Flavobacterium sp. CF136				pfam05425		No	Yes
2513473548	4		A8I14_00195	FALSE	FALSE	FALSE	FALSE		Putative copper export protein	495	164	arAOB	Marine Group I crenarchaeote sp. SCGC AAA288-I14				pfam05425		No	Yes
2513473611	10		A8I14_00258	TRUE	FALSE	FALSE	FALSE		Putative copper export protein	2859	952	arAOB	Marine Group I crenarchaeote sp. SCGC AAA288-I14		COG1276	P	pfam04234 pfam05425		Yes	Yes
2513475341	10		A1A19_00421	TRUE	FALSE	FALSE	FALSE		Putative copper export protein	2865	954	arAOB	Marine Group I crenarchaeote sp. SCGC AAA001-A19		COG1276	P	pfam04234 pfam05425		No	Yes
2513475608	4		A1A19_00688	FALSE	FALSE	FALSE	FALSE		Putative copper export protein	495	164	arAOB	Marine Group I crenarchaeote sp. SCGC AAA001-A19				pfam05425		No	Yes
2513476578	10		A7N19_00529	TRUE	FALSE	FALSE	FALSE		Putative copper export protein	2859	952	arAOB	Marine Group I crenarchaeote sp. SCGC AAA007-N19		COG1276	P	pfam04234 pfam05425		No	Yes
2513477196	4		A7N19_01147	FALSE	FALSE	FALSE	FALSE		Putative copper export protein	495	164	arAOB	Marine Group I crenarchaeote sp. SCGC AAA007-N19				pfam05425		No	Yes
2513524655	9		Amy_00680	FALSE	FALSE	FALSE	FALSE		Putative copper export protein	1026	341		Amycolatopsis sp. 75iv2, ATCC 39116		COG1276	P	pfam05425		No	Yes
2513524784	9		Amy_00809	TRUE	FALSE	FALSE	FALSE		Putative copper export protein	1773	590		Amycolatopsis sp. 75iv2, ATCC 39116		COG1276	P	pfam04234 pfam05425		Yes	Yes
2513526704	16		Amy_02732	FALSE	TRUE	FALSE	FALSE		Predicted membrane protein	2010	669		Amycolatopsis sp. 75iv2, ATCC 39116		COG3336	S	pfam05425 pfam09678		No	Yes
2513552747	4		A19SDRAFT_01470	FALSE	FALSE	FALSE	FALSE		Predicted integral membrane protein	459	152		Burkholderia mimosarum STM3621		COG5615	S	pfam05425		No	Yes
2513554281	8		A19SDRAFT_03007	FALSE	FALSE	FALSE	FALSE		Putative copper export protein	927	308		Burkholderia mimosarum STM3621		COG1276	P	pfam05425		No	Yes
2513561769	4		A19UDRAFT_02350	FALSE	FALSE	FALSE	FALSE		Predicted integral membrane protein	459	152		Burkholderia mimosarum LMG 23256		COG5615	S	pfam05425		No	Yes
2513562559	8		A19UDRAFT_03140	FALSE	FALSE	FALSE	FALSE		Putative copper export protein	927	308		Burkholderia mimosarum LMG 23256		COG1276	P	pfam05425		No	Yes
2513587492	8		YSYDRAFT_05782	TRUE	FALSE	FALSE	FALSE		Putative copper export protein	1569	522		Ensifer meliloti MVII-I		COG1276	P	pfam04234 pfam05425		Yes	Yes
2513595769	7		YY3DRAFT_01429	FALSE	FALSE	FALSE	FALSE		Putative copper export protein	879	292		Rhizobium mesoamericanum STM6155		COG1276	P	pfam05425		No	Yes
2513608934	9		YU3DRAFT_01200	TRUE	FALSE	FALSE	FALSE		Putative copper export protein	1629	542		Mesorhizobium sp. WSM3224		COG1276	P	pfam04234 pfam05425		No	Yes
2513620040	9		YU7DRAFT_05366	TRUE	FALSE	FALSE	FALSE		Putative copper export protein	1626	541		Ensifer meliloti RRI128		COG1276	P	pfam04234 pfam05425		No	Yes
2513626072	8		YU9DRAFT_04624	FALSE	FALSE	FALSE	FALSE		Putative copper export protein	909	302		Bradyrhizobium sp. WSM1743		COG1276	P	pfam05425		No	Yes
2513637875	9		YUADRAFT_01167	TRUE	FALSE	FALSE	FALSE		Putative copper export protein	1563	520		Bradyrhizobium sp. WSM3983		COG1276	P	pfam04234 pfam05425		Yes	Yes
2513637883	8		YUADRAFT_01175	FALSE	FALSE	FALSE	FALSE		Putative copper export protein	933	310		Bradyrhizobium sp. WSM3983		COG1276	P	pfam05425		No	Yes
2513646686	9		YUEDRAFT_01526	TRUE	FALSE	FALSE	FALSE		Putative copper export protein	1560	519		Bradyrhizobium japonicum USDA 122		COG1276	P	pfam04234 pfam05425		Yes	Yes
2513650435	13		YUEDRAFT_05285	FALSE	FALSE	FALSE	FALSE		Putative copper export protein	1656	551		Bradyrhizobium japonicum USDA 122		COG1276	P	pfam05425		No	Yes
2513656726	9		YUGDRAFT_03066	TRUE	FALSE	FALSE	FALSE		Putative copper export protein	1563	520		Bradyrhizobium elkanii USDA 3259		COG1276	P	pfam04234 pfam05425		Yes	Yes
2513662005	9		YUIDRAFT_00020	TRUE	FALSE	FALSE	FALSE		Putative copper export protein	1563	520		Bradyrhizobium japonicum USDA 6		COG1276	P	pfam04234 pfam05425		Yes	Yes
2513665661	14		YUIDRAFT_03685	FALSE	FALSE	FALSE	FALSE		Putative copper export protein	1656	551		Bradyrhizobium japonicum USDA 6		COG1276	P	pfam05425		No	Yes
2513675690	13		YY7DRAFT_04998	FALSE	FALSE	FALSE	FALSE		Putative copper export protein	1656	551		Bradyrhizobium elkanii WSM2783		COG1276	P	pfam05425		No	Yes
2513680377	3		YY7DRAFT_09690	FALSE	FALSE	FALSE	FALSE		Putative copper export protein	324	107		Bradyrhizobium elkanii WSM2783				pfam05425		No	Yes
2513700689	12		YUQDRAFT_01592	FALSE	FALSE	FALSE	FALSE		Putative copper export protein	1656	551		Bradyrhizobium japonicum USDA 135		COG1276	P	pfam05425		No	Yes
2513711825	4		YUSDRAFT_04817	FALSE	FALSE	FALSE	FALSE		Putative copper export protein	465	154		Rhizobium leguminosarum bv viciae VF39				pfam05425		No	Yes
2513718556	8		YUUDRAFT_04076	FALSE	FALSE	FALSE	FALSE		Putative copper export protein	930	309		Bradyrhizobium sp. EC3.3		COG1276	P	pfam05425		No	Yes
2513718560	9		YUUDRAFT_04080	TRUE	FALSE	FALSE	FALSE		Putative copper export protein	1563	520		Bradyrhizobium sp. EC3.3		COG1276	P	pfam04234 pfam05425		Yes	Yes
2513774478	8		YWCDRAFT_04530	FALSE	FALSE	FALSE	FALSE		Putative copper export protein	942	313		Massilia alkalitolerans DSM 17462		COG1276	P	pfam05425		No	Yes
2513774590	8		YWCDRAFT_04642	FALSE	FALSE	FALSE	FALSE		Putative copper export protein	900	299		Massilia alkalitolerans DSM 17462		COG1276	P	pfam05425		No	Yes
2513774944	8		YWCDRAFT_04997	FALSE	FALSE	FALSE	FALSE		Putative copper export protein	888	295		Massilia alkalitolerans DSM 17462		COG1276	P	pfam05425		No	Yes
2513777713	8		YWEDRAFT_02261	FALSE	FALSE	FALSE	FALSE		Putative copper export protein	882	293		Budvicia aquatica DSM 5075		COG1276	P	pfam05425		No	Yes
2513793430	9		YWKDRAFT_02357	TRUE	FALSE	FALSE	TRUE		Putative copper export protein	1668	555		Alicyclobacillus pomorum DSM 14955		COG1276	P	pfam04234 pfam05425 pfam13115		Yes	Yes
2513799584	9		YWMDRAFT_00250	FALSE	FALSE	FALSE	FALSE		Putative copper export protein	1026	341		Thermocrispum municipale DSM 44069		COG1276	P	pfam05425		No	Yes
2513803122	16		YWMDRAFT_03801	FALSE	TRUE	FALSE	FALSE		Predicted membrane protein	2022	673		Thermocrispum municipale DSM 44069		COG3336	S	pfam05425 pfam09678		No	Yes
2513803703	16		YWWDRAFT_00112	FALSE	TRUE	FALSE	FALSE		Predicted membrane protein	2055	684		Glycomyces tenuis DSM 44171		COG3336	S	pfam05425 pfam09678		No	Yes
2513805935	16		YWWDRAFT_02348	FALSE	TRUE	FALSE	FALSE		Predicted membrane protein	2415	804		Glycomyces tenuis DSM 44171		COG3336	S	pfam05425 pfam09678		No	Yes
2513807190	9		YWWDRAFT_03606	TRUE	FALSE	FALSE	FALSE		Putative copper export protein	1656	551		Glycomyces tenuis DSM 44171		COG1276	P	pfam04234 pfam05425		Yes	Yes
2513807263	9		YWWDRAFT_03679	TRUE	FALSE	FALSE	FALSE		Putative copper export protein	2616	871		Glycomyces tenuis DSM 44171		COG1276	P	pfam04234 pfam05425		No	Yes
2513809363	16		YWUDRAFT_00375	FALSE	TRUE	FALSE	FALSE		Predicted membrane protein	2226	741		Corynebacterium sputi DSM 45148		COG3336	S	pfam05425 pfam09678		No	Yes
2513812723	9		YWYDRAFT_00882	FALSE	FALSE	FALSE	FALSE		Putative copper export protein	1026	341		Thermocrispum agreste DSM 44070		COG1276	P	pfam05425		No	Yes
2513814121	16		YWYDRAFT_02284	FALSE	TRUE	FALSE	FALSE		Predicted membrane protein	2016	671		Thermocrispum agreste DSM 44070		COG3336	S	pfam05425 pfam09678		No	Yes
2513848758	9		A3CKDRAFT_02639	TRUE	FALSE	FALSE	FALSE		Putative copper export protein	1563	520		Bradyrhizobium sp. USDA 3384		COG1276	P	pfam04234 pfam05425		Yes	Yes
2513857916	9		A3AKDRAFT_02497	TRUE	FALSE	FALSE	FALSE		Putative copper export protein	1560	519		Bradyrhizobium elkanii USDA 94		COG1276	P	pfam04234 pfam05425		Yes	Yes
2513869257	8		A3A1DRAFT_04722	FALSE	FALSE	FALSE	FALSE		Putative copper export protein	879	292		Rhizobium sp. OR 191		COG1276	P	pfam05425		No	Yes
2513876491	9		A3AQDRAFT_04245	TRUE	FALSE	FALSE	FALSE		Putative copper export protein	1563	520		Bradyrhizobium japonicum USDA 4		COG1276	P	pfam04234 pfam05425		Yes	Yes
2513892739	8		A3AIDRAFT_05459	FALSE	FALSE	FALSE	FALSE		Putative copper export protein	963	320		Bradyrhizobium sp. TV2a.2		COG1276	P	pfam05425		No	Yes
2513910142	3		A3C1DRAFT_02663	FALSE	FALSE	FALSE	FALSE		Putative copper export protein	519	172		Rhizobium sullae WSM1592				pfam05425		No	Yes
2513917911	9		A3AMDRAFT_02909	TRUE	FALSE	FALSE	FALSE		Putative copper export protein	1563	520		Bradyrhizobium elkanii USDA 3254		COG1276	P	pfam04234 pfam05425		Yes	Yes
2513936075	9		A3AUDRAFT_05303	TRUE	FALSE	FALSE	FALSE		Putative copper export protein	1614	537		Mesorhizobium loti USDA 3471		COG1276	P	pfam04234 pfam05425		Yes	Yes
2513939836	9		A3AODRAFT_02270	TRUE	FALSE	FALSE	FALSE		Putative copper export protein	1563	520		Bradyrhizobium japonicum USDA 38		COG1276	P	pfam04234 pfam05425		Yes	Yes
2513941048	14		A3AODRAFT_03484	FALSE	FALSE	FALSE	FALSE		Putative copper export protein	1656	551		Bradyrhizobium japonicum USDA 38		COG1276	P	pfam05425		No	Yes
2513954916	8		A3AADRAFT_02755	FALSE	FALSE	FALSE	FALSE		Putative copper export protein	939	312		Cupriavidus taiwanensis STM6018		COG1276	P	pfam05425		No	Yes
2513956455	4		A3AADRAFT_04294	FALSE	FALSE	FALSE	FALSE		Predicted integral membrane protein	462	153		Cupriavidus taiwanensis STM6018		COG5615	S	pfam05425		No	Yes
2513960279	4		A3ACDRAFT_02195	FALSE	FALSE	FALSE	FALSE		Predicted integral membrane protein	459	152		Burkholderia sp. WSM2230		COG5615	S	pfam05425		No	Yes
2513963427	8		A3ACDRAFT_05348	FALSE	FALSE	FALSE	FALSE		Putative copper export protein	930	309		Burkholderia sp. WSM2230		COG1276	P	pfam05425		No	Yes
2513968317	9		A3M7DRAFT_02030	TRUE	FALSE	FALSE	FALSE		Putative copper export protein	1596	531		Bradyrhizobium sp. WSM2254		COG1276	P	pfam04234 pfam05425		Yes	Yes
2513971708	9		A3M7DRAFT_05429	TRUE	FALSE	FALSE	FALSE		Putative copper export protein	1557	518		Bradyrhizobium sp. WSM2254		COG1276	P	pfam04234 pfam05425		Yes	Yes
2513979232	4		A3GODRAFT_00520	FALSE	FALSE	FALSE	FALSE		Predicted integral membrane protein	450	149		Sedimenticola selenatireducens DSM 17993		COG5615	S	pfam05425		No	Yes
2514002021	9		A3AYDRAFT_05886	TRUE	FALSE	FALSE	FALSE		Putative copper export protein	1608	535		Rhizobium giardinii bv. giardinii H152		COG1276	P	pfam04234 pfam05425		Yes	Yes
2514010833	9		A3ASDRAFT_01512	TRUE	FALSE	FALSE	FALSE		Putative copper export protein	1563	520		Bradyrhizobium sp. WSM2793		COG1276	P	pfam04234 pfam05425		Yes	Yes
2514013209	8		A3ASDRAFT_03891	FALSE	FALSE	FALSE	FALSE		Putative copper export protein	903	300		Bradyrhizobium sp. WSM2793		COG1276	P	pfam05425		No	Yes
2514025134	8		A3A5DRAFT_00112	FALSE	FALSE	FALSE	FALSE		Putative copper export protein	951	316		Cupriavidus sp. UYPR2.512		COG1276	P	pfam05425		No	Yes
2514025822	4		A3A5DRAFT_00800	FALSE	FALSE	FALSE	FALSE		Predicted integral membrane protein	462	153		Cupriavidus sp. UYPR2.512		COG5615	S	pfam05425		No	Yes
2514036613	9		A3A9DRAFT_04113	TRUE	FALSE	FALSE	FALSE		Putative copper export protein	1638	545		Mesorhizobium loti CJ3sym		COG1276	P	pfam04234 pfam05425		No	Yes
2514041554	4		A3AGDRAFT_01645	FALSE	FALSE	FALSE	FALSE		Predicted integral membrane protein	462	153		Cupriavidus taiwanensis STM6070		COG5615	S	pfam05425		No	Yes
2514042814	8		A3AGDRAFT_02906	FALSE	FALSE	FALSE	FALSE		Putative copper export protein	948	315		Cupriavidus taiwanensis STM6070		COG1276	P	pfam05425		No	Yes
2514047406	8		A3A7DRAFT_01318	FALSE	FALSE	FALSE	FALSE		Putative copper export protein	930	309		Burkholderia sp. UYPR1.413		COG1276	P	pfam05425		No	Yes
2514048664	4		A3A7DRAFT_02582	FALSE	FALSE	FALSE	FALSE		Predicted integral membrane protein	459	152		Burkholderia sp. UYPR1.413		COG5615	S	pfam05425		No	Yes
2514051672	7		A3A7DRAFT_05593	FALSE	FALSE	FALSE	FALSE		Putative copper export protein	942	313		Burkholderia sp. UYPR1.413		COG1276	P	pfam05425		No	Yes
2514078286	9		AMIS_9680	TRUE	FALSE	FALSE	FALSE		putative copper resistance protein	1698	565		Actinoplanes missouriensis NBRC 102363		COG1276	P	pfam04234 pfam05425		No	Yes
2514080257	16		AMIS_29210	FALSE	TRUE	FALSE	FALSE		putative cytochrome c oxidase caa3 assembly factor	2019	672		Actinoplanes missouriensis NBRC 102363		COG3336	S	pfam05425 pfam09678		No	Yes
2514082164	9		AMIS_48210	TRUE	FALSE	FALSE	FALSE		putative copper resistance protein CopCD	1815	604		Actinoplanes missouriensis NBRC 102363		COG2372	R	pfam04234 pfam05425		Yes	Yes
2514090238	9		S23_33060	TRUE	FALSE	FALSE	FALSE		copper export protein	1563	520		Bradyrhizobium sp. S23321		COG1276	P	pfam04234 pfam05425		Yes	Yes
2514098608	8		S70_00860	FALSE	FALSE	FALSE	FALSE		putative resistance protein	897	298		Providencia stuartii MRSN 2154		COG1276	P	pfam05425		No	Yes
2514110724	9		B2K_32665	TRUE	FALSE	FALSE	FALSE		Uncharacterized protein, homolog of Cu resistance protein CopC	1632	543		Paenibacillus mucilaginosus K02		COG2372	R	pfam04234 pfam05425		Yes	Yes
2514113229	8		SMD_1485	FALSE	FALSE	FALSE	FALSE		Copper resistance protein D	927	308		Stenotrophomonas maltophilia D457		COG1276	P	pfam05425		No	Yes
2514114109	8		SMD_2365	FALSE	FALSE	FALSE	FALSE		Copper resistance protein D	885	294		Stenotrophomonas maltophilia D457		COG1276	P	pfam05425		No	Yes
2514121750	9		HBHAL_2470	FALSE	FALSE	FALSE	FALSE		copper transport protein	1089	362		Halobacillus halophilus DSM 2266		COG1276	P	pfam05425		No	Yes
2514129897	9		BANAU_0356	TRUE	FALSE	FALSE	TRUE		putative copper export protein	1629	542		Bacillus amyloliquefaciens plantarum YAU B9601-Y2		COG1276	P	pfam04234 pfam05425 pfam13115		Yes	Yes
2514157633	9		MUO_10580	TRUE	FALSE	FALSE	FALSE		copper resistance protein	1626	541		Listeria monocytogenes 07PF0776		COG1276	P	pfam04234 pfam05425		Yes	Yes
2514166704	8		KO11_13510	FALSE	FALSE	FALSE	FALSE		copper resistance protein D	873	290		Escherichia coli KO11FL		COG1276	P	pfam05425		No	Yes
2514209466	16		Cp267_1692	FALSE	TRUE	FALSE	FALSE		Copper resistance D domain-containing protein/Cytochrome c oxidase caa3 assembly factor (Caa3_CtaG)	2046	681		Corynebacterium pseudotuberculosis 267		COG3336	S	pfam05425 pfam09678		No	Yes
2514211883	9		H9401_1810	TRUE	FALSE	FALSE	TRUE		Membrane protein	1650	549		Bacillus anthracis H9401		COG1276	P	pfam04234 pfam05425 pfam13115		Yes	Yes
2514216356	9		MY9_0411	TRUE	FALSE	FALSE	TRUE		Copper resistance protein CopC	1626	541		Bacillus sp. JS		COG1276	P	pfam04234 pfam05425 pfam13115		Yes	Yes
2514226324	8		P12B_c1245	FALSE	FALSE	FALSE	FALSE		Copper resistance protein D	873	290		Escherichia coli P12b		COG1276	P	pfam05425		No	Yes
2514228709	8		P12B_c3595	FALSE	FALSE	FALSE	FALSE		Copper resistance protein D	930	309		Escherichia coli P12b		COG1276	P	pfam05425		No	Yes
2514232107	4		BP1026B_I2464	FALSE	FALSE	FALSE	FALSE		integral membrane protein	459	152		Burkholderia pseudomallei 1026b		COG5615	S	pfam05425		No	Yes
2514232467	8		BP1026B_I2824	FALSE	FALSE	FALSE	FALSE		transmembrane transporter protein	927	308		Burkholderia pseudomallei 1026b		COG1276	P	pfam05425		No	Yes
2514233880	8		BP1026B_II0513	FALSE	FALSE	FALSE	FALSE		copper-resistance membrane protein	924	307		Burkholderia pseudomallei 1026b		COG1276	P	pfam05425		No	Yes
2514250839	8		CDCO157_2385	FALSE	FALSE	FALSE	FALSE		putative resistance protein	873	290		Escherichia coli Xuzhou21		COG1276	P	pfam05425		No	Yes
2514262236	15		MOPEL_135_01770	FALSE	TRUE	FALSE	FALSE		Predicted membrane protein	1986	661		Mobilicoccus pelagius NBRC 104925		COG3336	S	pfam05425 pfam09678		No	Yes
2514266645	4		HMPREF1030_04300	FALSE	FALSE	FALSE	FALSE		Predicted integral membrane protein	465	154		Pseudomonas sp. 2_1_26		COG5615	S	pfam05425		No	Yes
2514268137	4		HMPREF1030_05787	FALSE	FALSE	FALSE	FALSE		Copper resistance protein D	435	144		Pseudomonas sp. 2_1_26				pfam05425		No	Yes
2514274194	16		CCAS_03925	FALSE	TRUE	FALSE	FALSE		4.2 Detoxification	2055	684		Corynebacterium casei UCMA 3821		COG3336	S	pfam05425 pfam09678		No	Yes
2514282423	8		HMPREF1024_00371	FALSE	FALSE	FALSE	FALSE		Putative copper export protein	870	289		Klebsiella sp. 4_1_44FAA		COG1276	P	pfam05425		No	Yes
2514287156	8		HMPREF1024_05034	FALSE	FALSE	FALSE	FALSE		copper resistance protein D	930	309		Klebsiella sp. 4_1_44FAA		COG1276	P	pfam05425		No	Yes
2514289831	8		HMPREF9428_04716	FALSE	FALSE	FALSE	FALSE		copper resistance protein D	930	309		Citrobacter freundii 4_7_47CFAA		COG1276	P	pfam05425		No	Yes
2514291643	8		HMPREF9428_01751	FALSE	FALSE	FALSE	FALSE		inner membrane protein YebZ	873	290		Citrobacter freundii 4_7_47CFAA		COG1276	P	pfam05425		No	Yes
2514301368	13		BRAO285_570029	FALSE	FALSE	FALSE	FALSE		16.1 : Circulate	1659	552		Bradyrhizobium sp. ORS285		COG1276	P	pfam05425		No	Yes
2514328238	8		PPL19_18307	FALSE	FALSE	FALSE	FALSE		putative copper resistance protein D	897	298		Pseudomonas psychrotolerans L19		COG1276	P	pfam05425		No	Yes
2514329382	7		PPL19_24006	FALSE	FALSE	FALSE	FALSE		copper resistance D	837	279		Pseudomonas psychrotolerans L19		COG1276	P	pfam05425		No	Yes
2514346729	15		HMPREF1324_2246	FALSE	TRUE	FALSE	FALSE		copper resistance protein D / cytochrome C oxidase Caa3 assembly factor multi-domain protein	2181	726		Rothia aeria F0474		COG3336	S	pfam05425 pfam09678		No	Yes
2514347915	16		IMCC13023_02190	FALSE	TRUE	FALSE	FALSE		Predicted membrane protein	1962	653		Candidatus Aquiluna sp. IMCC13023		COG3336	S	pfam05425 pfam09678		No	No
2514365995	16		W59_03531	FALSE	TRUE	FALSE	FALSE		putative copper resistance protein	1935	644		Rhodococcus imtechensis RKJ300		COG3336	S	pfam05425 pfam09678		No	Yes
2514366684	16		W59_07035	FALSE	TRUE	FALSE	FALSE		copper resistance transporter	2031	676		Rhodococcus imtechensis RKJ300		COG3336	S	pfam05425 pfam09678		No	Yes
2514368691	9		W59_17429	FALSE	FALSE	FALSE	FALSE		copper resistance D domain-containing protein	939	312		Rhodococcus imtechensis RKJ300		COG1276	P	pfam05425		Yes	Yes
2514377683	4		PseS9_010100010305	FALSE	FALSE	FALSE	FALSE		Predicted integral membrane protein	465	154		Pseudomonas sp. S9		COG5615	S	pfam05425		No	Yes
2514387567	9		PDENDC454_25154	TRUE	FALSE	FALSE	FALSE		copper resistance protein CopC	1992	663		Paenibacillus dendritiformis C454		COG1276	P	pfam04234 pfam05425		Yes	Yes
2514392452	9		MY7_0232	TRUE	FALSE	FALSE	TRUE		Copper resistance protein CopC	1683	560		Bacillus sp. 5B6		COG1276	P	pfam04234 pfam05425 pfam13115		No	Yes
2514400776	4		HMPREF1019_00509	FALSE	FALSE	FALSE	FALSE		Uncharacterized protein conserved in bacteria	432	143		Campylobacter sp. 10_1_50		COG3399	S	pfam05425		No	Yes
2514417424	9		MEA186_05066	TRUE	FALSE	FALSE	FALSE		putative copper resistance protein D	1641	546		Mesorhizobium amorphae CCNWGS0123		COG1276	P	pfam04234 pfam05425		No	Yes
2514442916	8		BRAS3809_5550005	FALSE	FALSE	FALSE	FALSE		Copper resistance D	984	327		Bradyrhizobium sp. STM 3809		COG1276	P	pfam05425		No	Yes
2514443436	13		BRAS3809_6200005	FALSE	FALSE	FALSE	FALSE		16.1 : Circulate	1659	552		Bradyrhizobium sp. STM 3809		COG1276	P	pfam05425		No	Yes
2514469572	16		GOTRE_026_00660	FALSE	TRUE	FALSE	FALSE		Predicted membrane protein	2025	674		Gordonia terrae NBRC 100016		COG3336	S	pfam05425 pfam09678		No	Yes
2514473305	9		GOTRE_170_00400	FALSE	FALSE	FALSE	FALSE		Putative copper export protein	906	301		Gordonia terrae NBRC 100016		COG1276	P	pfam05425		No	Yes
2514474692	9		GOSPT_034_00300	TRUE	FALSE	FALSE	FALSE		putative copper resistance protein	1701	566		Gordonia sputi NBRC 100414		COG1276	P	pfam04234 pfam05425		Yes	Yes
2514491268	9		HMPREF1014_01910	TRUE	FALSE	FALSE	TRUE		Putative copper export protein	1635	544		Bacillus sp. 7_6_55CFAA_CT2		COG1276	P	pfam04234 pfam05425 pfam13115		Yes	Yes
2514500151	4		KYC_24442	FALSE	FALSE	FALSE	FALSE		integral membrane protein 4	564	187		Achromobacter arsenitoxydans SY8		COG5615	S	pfam05425		No	Yes
2514518433	4		HMPREF9712_03426	FALSE	FALSE	FALSE	FALSE		Copper resistance protein D	453	150		Myroides odoratimimus CCUG 10230				pfam05425		No	Yes
2514525827	4		HMPREF0731_2844	FALSE	FALSE	FALSE	FALSE		Predicted integral membrane protein	474	157		Roseomonas cervicalis ATCC 49957		COG5615	S	pfam05425		No	Yes
2514526438	8		HMPREF0731_3445	FALSE	FALSE	FALSE	FALSE		copper resistance D	891	296		Roseomonas cervicalis ATCC 49957		COG1276	P	pfam05425		No	Yes
2514529334	3		KYG_07815	FALSE	FALSE	FALSE	FALSE		Predicted integral membrane protein	408	135		Acidovorax sp. NO-1		COG5615	S	pfam05425		No	Yes
2514534327	16		NestF_010100009161	FALSE	TRUE	FALSE	FALSE		membrane protein	2196	731		Nesterenkonia sp. F		COG3336	S	pfam05425 pfam09678		No	Yes
2514540928	4		KYE_17903	FALSE	FALSE	FALSE	FALSE		Predicted integral membrane protein	456	151		Marinobacter manganoxydans MnI7-9		COG5615	S	pfam05425		No	Yes
2514547726	6		OR16_09729	FALSE	FALSE	FALSE	FALSE		copper resistance D domain-containing protein	861	286		Cupriavidus basilensis OR16		COG1276	P	pfam05425		No	Yes
2514547947	4		OR16_10948	FALSE	FALSE	FALSE	FALSE		Predicted integral membrane protein	462	153		Cupriavidus basilensis OR16		COG5615	S	pfam05425		No	Yes
2514558328	8		SEE_02975	FALSE	FALSE	FALSE	FALSE		Copper resistance protein D	876	291		Salmonella enterica enterica sv Typhimurium TN061786		COG1276	P	pfam05425		No	Yes
2514601096	8		CKS_1800	FALSE	FALSE	FALSE	FALSE		GO:0005507 - copper ion binding	876	291		Pantoea strewartii stewartii DC283		COG1276	P	pfam05425		No	Yes
2514605610	8		AJE_10599	FALSE	FALSE	FALSE	FALSE		copper export protein	891	296		Alishewanella jeotgali KCTC 22429		COG1276	P	pfam05425		No	Yes
2514605896	8		AJE_12034	FALSE	FALSE	FALSE	FALSE		copper resistance D domain-containing protein	858	285		Alishewanella jeotgali KCTC 22429		COG1276	P	pfam05425		No	Yes
2514621350	8		ETW09_010100002795	FALSE	FALSE	FALSE	FALSE		copper resistance protein D	873	290		Escherichia sp. TW09308		COG1276	P	pfam05425		No	Yes
2514654338	15		O3I_15109	FALSE	TRUE	FALSE	FALSE		Predicted membrane protein	2058	685		Nocardia brasiliensis ATCC 700358		COG3336	S	pfam05425 pfam09678		No	Yes
2514655494	9		O3I_20850	FALSE	FALSE	FALSE	FALSE		copper resistance D domain-containing protein	954	317		Nocardia brasiliensis ATCC 700358		COG1276	P	pfam05425		No	Yes
2514673845	8		HMPREF0454_03637	FALSE	FALSE	FALSE	FALSE		copper resistance protein D	885	294		Hafnia alvei ATCC 51873		COG1276	P	pfam05425		No	Yes
2514700912	9		HMPREF1015_01566	TRUE	FALSE	FALSE	FALSE		Putative copper export protein	1650	549		Bacillus smithii 7_3_47FAA		COG1276	P	pfam04234 pfam05425		Yes	Yes
2514709313	16		AK37_16620	FALSE	TRUE	FALSE	FALSE		integral membrane protein	2013	670		Rhodococcus pyridinivorans AK37		COG3336	S	pfam05425 pfam09678		No	Yes
2514709420	9		AK37_17165	FALSE	FALSE	FALSE	FALSE		copper resistance D domain-containing protein	939	312		Rhodococcus pyridinivorans AK37		COG1276	P	pfam05425		No	Yes
2514816673	8		EH105704_01_03340	FALSE	FALSE	FALSE	FALSE		Putative copper export protein	876	291		Escherichia hermannii NBRC 105704		COG1276	P	pfam05425		No	Yes
2514818989	8		EH105704_07_01690	FALSE	FALSE	FALSE	FALSE		Putative copper export protein	930	309		Escherichia hermannii NBRC 105704		COG1276	P	pfam05425		No	Yes
2514825366	8		SPW_4755	TRUE	FALSE	FALSE	FALSE		putative integral membrane protein	1932	643		Streptomyces sp. W007		COG2372	R	pfam04234 pfam05425		Yes	Yes
2514826868	8		SPW_6247	FALSE	FALSE	FALSE	FALSE		Putative copper export protein	1074	357		Streptomyces sp. W007		COG1276	P	pfam05425		No	Yes
2515012252	9		USDA257_c38890	TRUE	FALSE	FALSE	FALSE		copper binding protein	1632	543		Ensifer fredii USDA 257		COG1276	P	pfam04234 pfam05425		No	Yes
2515063104	9		GOAMR_61_00260	FALSE	FALSE	FALSE	FALSE		Putative copper export protein	930	309		Gordonia amarae NBRC 15530		COG1276	P	pfam05425		No	Yes
[truncated: 8,912 more rows]

## Sheet: TMHMM-pre-hel
gene_oid	len	expAA	First60	PredHel	Topology
637001825	290	ExpAA=173.32	First60=31.86	8	Topology=o11-30i51-73o93-110i117-136o151-170i190-212o227-249i262-284o
637025272	661	ExpAA=346.80	First60=22.01	16	Topology=i25-47o67-89i113-135o155-173i180-199o214-236i243-265o280-299i311-333o370-389i401-423o438-460i483-505o520-539i552-574o597-619i
637037280	249	ExpAA=169.59	First60=40.21	8	Topology=o4-23i28-50o65-87i94-116o126-145i158-180o190-212i225-247o
637051437	154	ExpAA=82.75	First60=30.39	4	Topology=o4-26i54-76o86-103i133-150o
637055044	144	ExpAA=83.74	First60=34.87	4	Topology=i5-27o49-71i84-106o121-143i
637058992	535	ExpAA=215.17	First60=41.95	10	Topology=o5-27i40-62o82-104i111-130o145-164i177-199o214-236i249-266o306-328i333-355o
637064362	290	ExpAA=172.91	First60=31.99	8	Topology=o11-30i51-73o93-110i117-136o151-170i190-212o227-249i262-284o
637072929	659	ExpAA=346.38	First60=22.69	16	Topology=i19-41o70-92i113-130o155-177i184-203o213-235i242-264o279-301i314-336o368-387i399-421o436-458i481-503o518-537i550-572o596-618i
637075903	537	ExpAA=199.07	First60=22.57	9	Topology=i12-34o152-174i181-202o224-246i253-275o285-307i320-342o352-374i394-416o
637083187	290	ExpAA=172.91	First60=31.99	8	Topology=o11-30i51-73o93-110i117-136o151-170i190-212o227-249i262-284o
637094374	661	ExpAA=346.80	First60=22.01	16	Topology=i25-47o67-89i113-135o155-173i180-199o214-236i243-265o280-299i311-333o370-389i401-423o438-460i483-505o520-539i552-574o597-619i
637103420	150	ExpAA=87.02	First60=28.71	4	Topology=o10-32i53-75o85-107i127-149o
637104639	148	ExpAA=87.15	First60=32.17	4	Topology=o6-28i49-71o81-103i123-145o
637108222	150	ExpAA=87.02	First60=28.71	4	Topology=o10-32i53-75o85-107i127-149o
637108551	148	ExpAA=87.13	First60=32.17	4	Topology=o6-28i49-71o81-103i123-145o
637113298	148	ExpAA=87.15	First60=32.17	4	Topology=o6-28i49-71o81-103i123-145o
637114041	150	ExpAA=87.05	First60=28.71	4	Topology=o10-32i53-75o85-107i127-149o
637116450	145	ExpAA=83.90	First60=23.41	4	Topology=i7-29o60-78i85-107o122-144i
637119011	678	ExpAA=346.41	First60=24.48	16	Topology=i13-35o60-82i103-122o149-168i177-199o209-231i244-266o281-303i315-337o375-397i410-432o442-464i496-518o522-541i561-583o608-630i
637135262	689	ExpAA=351.09	First60=24.08	16	Topology=i21-43o70-92i105-127o147-169i176-198o213-235i255-272o282-304i325-347o386-408i420-442o457-479i500-522o537-556i568-590o619-641i
637137441	661	ExpAA=346.80	First60=22.01	16	Topology=i25-47o67-89i113-135o155-173i180-199o214-236i243-265o280-299i311-333o370-389i401-423o438-460i483-505o520-539i552-574o597-619i
637144519	154	ExpAA=84.08	First60=30.36	4	Topology=o10-29i49-71o86-108i134-153o
637165871	541	ExpAA=194.03	First60=20.39	9	Topology=i7-26o151-170i191-213o233-255i260-277o297-319i332-354o369-391i403-425o
637169246	153	ExpAA=88.70	First60=33.93	4	Topology=o5-27i48-70o80-102i130-152o
637170013	559	ExpAA=266.08	First60=23.07	13	Topology=i13-35o95-117i130-152o162-184i205-227o237-259i280-302o368-386i393-411o431-449i462-479o489-511i532-554o
637180069	541	ExpAA=201.53	First60=22.08	9	Topology=i20-42o150-172i184-206o228-250i257-279o289-311i324-346o356-378i398-420o
637200831	294	ExpAA=173.71	First60=36.38	8	Topology=o10-32i44-66o94-111i118-140o155-177i194-216o231-253i266-288o
637207296	589	ExpAA=160.69	First60=0.03	8	Topology=o110-132i139-161o181-203i210-229o244-266i279-298o313-335i438-457o
637207375	694	ExpAA=183.39	First60=21.62	8	Topology=i5-27o145-167i180-202o228-250i285-307o322-344i357-376o391-413i
637209615	350	ExpAA=137.33	First60=22.43	5	Topology=i34-56o71-90i243-265o285-307i328-348o
637212600	291	ExpAA=172.28	First60=31.27	8	Topology=o10-32i52-74o94-113i120-137o152-174i195-217o227-249i270-288o
637217145	291	ExpAA=172.20	First60=31.27	8	Topology=o10-32i52-74o94-113i120-137o152-174i195-217o227-249i270-288o
637221889	541	ExpAA=194.13	First60=20.38	9	Topology=i7-26o151-170i191-213o233-255i260-277o297-319i332-354o369-391i403-425o
637224921	541	ExpAA=194.01	First60=20.40	9	Topology=i7-26o151-170i191-213o233-255i260-277o297-319i332-354o369-391i403-425o
637240519	309	ExpAA=178.83	First60=38.08	8	Topology=o10-32i45-67o87-109i122-144o159-181i201-223o233-255i282-304o
637266061	335	ExpAA=154.02	First60=23.99	7	Topology=i25-47o62-81i102-124o193-215i228-250o270-292i313-333o
637268220	680	ExpAA=192.42	First60=21.86	9	Topology=i12-34o153-175i188-210o234-256i269-291o306-328i348-365o380-399i517-539o
637268312	589	ExpAA=184.75	First60=7.36	8	Topology=o146-165i177-198o218-240i253-273o288-310i322-339o354-376i436-458o
637278817	544	ExpAA=195.50	First60=22.39	9	Topology=i7-29o151-170i183-202o228-250i257-279o294-316i337-359o369-391i403-425o
637302293	544	ExpAA=195.73	First60=21.90	9	Topology=i7-29o151-170i183-202o229-251i263-285o295-317i337-359o369-391i403-425o
637310967	294	ExpAA=173.71	First60=36.38	8	Topology=o10-32i44-66o94-111i118-140o155-177i194-216o231-253i266-288o
637318618	154	ExpAA=82.06	First60=31.21	4	Topology=o4-26i54-76o86-103i133-150o
637319881	291	ExpAA=173.39	First60=30.42	8	Topology=o10-32i52-74o94-113i120-142o152-174i187-209o224-246i267-289o
637326067	366	ExpAA=215.99	First60=41.30	10	Topology=o10-29i42-64o84-106i113-130o145-167i179-201o214-236i256-274o312-334i341-363o
637356087	290	ExpAA=173.47	First60=31.86	8	Topology=o11-30i51-73o93-110i117-136o151-170i190-212o227-249i262-284o
637372452	555	ExpAA=199.32	First60=21.45	9	Topology=i39-61o172-194i207-229o244-266i273-295o305-327i340-362o377-396i417-439o
637374497	551	ExpAA=285.73	First60=25.59	13	Topology=o15-37i58-80o95-114i126-145o160-182i195-217o232-254i274-296o375-392i397-414o437-455i468-490o529-546i
637404809	291	ExpAA=172.20	First60=31.27	8	Topology=o10-32i52-74o94-113i120-137o152-174i195-217o227-249i270-288o
637418622	549	ExpAA=195.77	First60=22.31	9	Topology=i12-34o156-175i188-207o235-257i262-284o299-321i342-364o374-396i408-430o
637428383	715	ExpAA=214.85	First60=35.11	10	Topology=o5-27i47-66o96-115i122-141o156-178i198-220o235-257i324-343o372-394i406-428o
637447538	147	ExpAA=87.05	First60=29.22	4	Topology=i2-24o56-78i85-107o122-144i
637464459	297	ExpAA=174.63	First60=37.10	8	Topology=o15-32i44-66o94-111i118-140o155-177i198-220o235-257i270-292o
637476066	526	ExpAA=197.27	First60=23.21	9	Topology=i7-29o144-166i173-195o215-237i244-266o276-298i310-332o347-365i386-408o
637486995	154	ExpAA=85.32	First60=30.80	4	Topology=i7-29o54-76i89-108o128-150i
637492291	294	ExpAA=173.71	First60=36.38	8	Topology=o10-32i44-66o94-111i118-140o155-177i194-216o231-253i266-288o
637505025	544	ExpAA=195.73	First60=21.90	9	Topology=i7-29o151-170i183-202o229-251i263-285o295-317i337-359o369-391i403-425o
637513183	544	ExpAA=195.60	First60=22.35	9	Topology=i7-29o151-170i183-202o229-251i263-285o295-317i337-359o369-391i403-425o
637527014	679	ExpAA=370.64	First60=33.34	17	Topology=o22-44i46-68o78-95i115-137o157-179i186-208o218-238i251-273o283-305i325-347o390-409i422-444o459-481i510-532o537-559i568-590o620-642i
637527112	670	ExpAA=353.10	First60=34.21	16	Topology=i13-35o50-72i85-107o122-144i157-174o189-211i224-246o256-278i298-320o360-382i395-414o429-451i472-494o509-531i544-566o593-615i
637533282	294	ExpAA=173.71	First60=36.38	8	Topology=o10-32i44-66o94-111i118-140o155-177i194-216o231-253i266-288o
637545960	547	ExpAA=194.57	First60=21.31	9	Topology=i7-29o154-173i186-205o232-254i266-288o298-320i340-362o372-394i406-428o
637561114	308	ExpAA=176.98	First60=27.86	8	Topology=o13-35i56-78o98-120i127-149o169-191i204-226o241-263i284-306o
637562842	130	ExpAA=66.28	First60=21.95	3	Topology=i27-49o62-84i105-127o
637566686	308	ExpAA=176.98	First60=27.86	8	Topology=o13-35i56-78o98-120i127-149o169-191i204-226o241-263i284-306o
637567056	152	ExpAA=89.35	First60=32.14	4	Topology=o4-26i52-74o84-106i127-149o
637569905	314	ExpAA=171.66	First60=28.41	7	Topology=i13-35o55-74i94-116o159-181i194-216o231-253i284-306o
637572618	309	ExpAA=189.56	First60=39.72	9	Topology=i12-31o41-63i70-92o115-137i149-166o176-198i211-233o248-267i288-307o
637573840	683	ExpAA=352.14	First60=25.77	16	Topology=i30-52o72-94i115-137o157-179i186-207o217-239i251-273o283-305i324-346o385-402i414-436o451-473i501-523o533-555i575-597o617-639i
637586361	147	ExpAA=86.31	First60=31.06	4	Topology=i5-27o54-76i83-102o117-139i
637601261	291	ExpAA=172.24	First60=31.27	8	Topology=o10-32i52-74o94-113i120-137o152-174i195-217o227-249i270-288o
637605770	281	ExpAA=174.34	First60=39.36	8	Topology=o10-32i44-66o81-103i110-132o136-158i179-198o213-235i256-278o
637610705	151	ExpAA=89.06	First60=36.95	4	Topology=o7-29i42-64o79-101i131-150o
637640758	291	ExpAA=171.93	First60=30.99	8	Topology=o10-32i52-74o94-113i120-137o152-174i195-217o227-249i270-288o
637651838	310	ExpAA=175.08	First60=38.66	8	Topology=o10-32i44-66o92-114i121-143o158-177i198-220o235-257i278-300o
637654214	154	ExpAA=82.74	First60=30.65	4	Topology=o15-37i49-71o86-103i133-150o
637664322	772	ExpAA=345.82	First60=13.48	16	Topology=i48-70o90-112i133-152o181-198i203-222o237-259i272-294o304-326i353-375o415-434i447-469o479-501i526-548o563-585i592-614o647-669i
637669311	146	ExpAA=79.79	First60=29.15	3	Topology=i5-27o84-106i119-141o
637684658	692	ExpAA=353.37	First60=23.34	16	Topology=i20-42o69-91i103-125o148-170i172-194o209-231i252-274o280-302i319-341o382-404i417-439o449-471i492-514o529-550i562-584o614-636i
637691620	153	ExpAA=83.50	First60=29.24	4	Topology=o5-27i57-79o84-103i131-148o
637691895	303	ExpAA=170.03	First60=38.18	8	Topology=o10-32i45-64o92-114i119-137o152-174i195-217o232-251i278-300o
637709478	151	ExpAA=89.95	First60=37.85	4	Topology=o4-26i47-69o79-101i128-150o
637722748	142	ExpAA=87.99	First60=35.69	4	Topology=i12-31o46-68i81-103o118-140i
637722855	659	ExpAA=205.30	First60=20.81	9	Topology=i7-26o157-179i192-214o234-256i269-288o303-325i346-368o383-405i446-468o
637735957	300	ExpAA=173.12	First60=26.63	8	Topology=o15-35i56-78o93-115i128-147o162-181i202-221o236-253i274-296o
637738224	550	ExpAA=303.52	First60=34.92	14	Topology=o15-34i46-68o93-115i122-144o159-181i201-223o233-255i276-298o360-378i390-412o427-446i458-480o485-507i514-536o
637741076	154	ExpAA=84.56	First60=30.34	4	Topology=o4-26i52-74o84-106i133-150o
637743323	285	ExpAA=173.78	First60=34.39	8	Topology=o10-29i50-72o92-114i119-141o151-173i186-208o218-240i261-283o
637743694	287	ExpAA=154.95	First60=42.16	7	Topology=i7-29o39-58i95-117o137-159i180-202o212-234i261-283o
637764013	152	ExpAA=88.53	First60=31.27	4	Topology=o4-26i52-74o84-106i127-149o
637764315	310	ExpAA=185.05	First60=28.59	8	Topology=o13-35i56-78o98-120i127-149o164-186i207-229o239-261i281-303o
637767609	313	ExpAA=167.72	First60=30.87	8	Topology=o13-35i56-78o93-115i122-139o159-181i194-216o231-253i289-311o
637784854	160	ExpAA=87.35	First60=30.78	4	Topology=o5-27i52-74o84-106i135-157o
637788793	544	ExpAA=195.73	First60=21.90	9	Topology=i7-29o151-170i183-202o229-251i263-285o295-317i337-359o369-391i403-425o
637793021	147	ExpAA=84.47	First60=30.06	4	Topology=o10-32i53-75o90-109i129-146o
637812408	702	ExpAA=218.45	First60=38.08	10	Topology=o15-37i44-66o92-114i121-143o153-175i226-248o263-280i309-331o357-379i388-410o
637812852	702	ExpAA=218.45	First60=38.08	10	Topology=o15-37i44-66o92-114i121-143o153-175i226-248o263-280i309-331o357-379i388-410o
637818838	527	ExpAA=289.22	First60=22.72	12	Topology=o15-37i65-84o99-121i128-147o162-184i197-219o229-251i271-290o351-370i442-461o471-493i506-523o
637832609	149	ExpAA=85.29	First60=30.05	4	Topology=o10-32i52-74o79-101i128-147o
637839257	315	ExpAA=171.87	First60=27.18	8	Topology=o13-35i55-77o97-119i126-143o158-180i193-215o230-252i285-307o
637840283	308	ExpAA=177.77	First60=27.53	8	Topology=o13-35i56-78o98-120i127-149o169-191i204-226o241-263i284-306o
637840614	152	ExpAA=89.26	First60=30.61	4	Topology=o4-26i52-74o84-106i127-149o
637853235	310	ExpAA=174.61	First60=35.54	8	Topology=o6-28i49-71o91-113i120-142o157-179i199-221o231-248i269-291o
637873864	538	ExpAA=193.13	First60=22.33	9	Topology=i7-29o150-172i192-214o229-248i255-277o282-304i334-353o363-385i405-427o
637875916	541	ExpAA=196.63	First60=22.40	9	Topology=i7-29o149-171i191-213o228-250i255-274o284-306i326-348o358-380i400-422o
637880116	736	ExpAA=350.20	First60=38.53	16	Topology=i2-24o44-66i94-116o136-158i165-187o192-214i235-257o267-287i333-355o392-411i431-453o463-485i506-528o543-565i586-608o628-650i
637881502	559	ExpAA=194.90	First60=21.91	9	Topology=i5-27o155-177i190-212o232-254i267-286o296-318i330-352o367-389i423-445o
637884496	512	ExpAA=182.34	First60=0.55	8	Topology=o127-146i153-175o200-222i229-251o261-283i296-318o333-352i373-395o
637916033	158	ExpAA=87.63	First60=32.72	4	Topology=o10-28i48-70o90-112i133-155o
637925534	539	ExpAA=205.33	First60=20.44	9	Topology=i21-43o154-176i183-205o230-252i259-281o291-313i326-348o363-385i398-420o
637933747	290	ExpAA=173.24	First60=31.91	8	Topology=o11-30i51-73o93-110i117-136o151-170i190-212o227-249i262-284o
637940004	160	ExpAA=89.50	First60=21.72	4	Topology=i21-43o63-85i92-114o137-159i
637946301	152	ExpAA=86.92	First60=30.57	4	Topology=o4-26i52-74o84-106i126-148o
637948978	309	ExpAA=176.86	First60=26.80	8	Topology=o13-35i56-78o93-115i128-150o160-182i202-224o234-256i277-299o
637964478	310	ExpAA=169.88	First60=37.16	7	Topology=o11-33i46-68o91-110i122-144o159-178i199-221o236-258i
637964907	319	ExpAA=161.15	First60=27.89	7	Topology=i13-35o55-74i133-155o165-187i207-229o244-266i294-316o
637970655	519	ExpAA=187.78	First60=12.46	8	Topology=o131-153i165-184o204-226i238-260o270-292i305-327o342-364i383-400o
637975141	305	ExpAA=175.53	First60=38.30	8	Topology=o10-30i43-65o91-113i120-142o157-176i196-218o228-250i279-301o
637981087	299	ExpAA=178.36	First60=38.36	8	Topology=o10-32i45-67o94-116i123-145o165-187i194-216o231-253i274-296o
637986048	546	ExpAA=277.02	First60=25.62	13	Topology=o15-37i57-79o94-116i123-145o160-182i195-217o232-254i266-288o368-385i392-411o433-450i462-484o526-543i
638000344	154	ExpAA=84.13	First60=28.76	4	Topology=o10-32i53-75o85-107i134-153o
638007056	288	ExpAA=173.89	First60=33.75	8	Topology=o5-27i48-70o85-107i114-136o146-168i189-211o221-240i261-283o
638010805	322	ExpAA=174.66	First60=30.95	8	Topology=o10-32i52-74o94-116i121-143o158-180i201-223o238-257i293-312o
638015024	152	ExpAA=89.47	First60=30.50	4	Topology=o4-26i52-74o84-106i127-149o
638015336	310	ExpAA=186.90	First60=28.82	8	Topology=o13-35i56-78o98-120i127-149o164-186i207-229o239-261i281-303o
638018036	313	ExpAA=170.76	First60=29.83	8	Topology=o13-35i56-75o95-117i124-143o158-180i193-215o230-252i287-309o
638032754	665	ExpAA=348.87	First60=24.09	16	Topology=i12-34o61-83i96-118o149-171i176-195o205-227i239-261o271-293i312-334o371-393i405-427o437-459i489-511o521-543i556-578o604-626i
638034211	309	ExpAA=192.39	First60=42.01	9	Topology=i7-26o36-58i71-93o118-140i145-167o177-199i211-233o243-265i286-308o
638040377	294	ExpAA=173.71	First60=36.38	8	Topology=o10-32i44-66o94-111i118-140o155-177i194-216o231-253i266-288o
638043249	294	ExpAA=173.71	First60=36.38	8	Topology=o10-32i44-66o94-111i118-140o155-177i194-216o231-253i266-288o
638062919	290	ExpAA=173.47	First60=31.86	8	Topology=o11-30i51-73o93-110i117-136o151-170i190-212o227-249i262-284o
638075576	290	ExpAA=173.30	First60=31.86	8	Topology=o11-30i51-73o93-110i117-136o151-170i190-212o227-249i262-284o
638087984	676	ExpAA=349.22	First60=24.55	16	Topology=i24-46o66-88i108-127o153-170i175-197o212-234i247-269o279-301i320-342o381-398i410-432o447-469i497-519o529-551i564-586o612-634i
638090575	312	ExpAA=192.16	First60=43.73	9	Topology=i7-27o37-59i72-94o120-142i149-166o181-203i216-238o248-270i291-310o
638096856	569	ExpAA=192.82	First60=22.16	9	Topology=i7-29o154-176i183-205o233-255i268-288o298-320i333-352o367-389i433-455o
638100994	787	ExpAA=325.35	First60=22.23	15	Topology=o34-56i162-184o204-221i228-250o260-282i303-325o335-354i391-413o452-474i486-505o520-542i575-597o602-624i637-656o686-708i
638125239	300	ExpAA=175.69	First60=26.87	8	Topology=o15-37i57-79o99-121i128-150o155-177i197-219o234-256i277-299o
638125715	152	ExpAA=88.39	First60=32.85	4	Topology=o4-26i53-75o80-102i129-151o
638126367	155	ExpAA=86.48	First60=31.55	4	Topology=o10-29i49-71o86-105i132-154o
638127797	550	ExpAA=292.37	First60=25.87	14	Topology=o15-37i58-80o95-117i124-146o161-183i195-217o227-249i276-298o371-389i396-413o436-454i467-489o499-516i528-547o
638129104	159	ExpAA=91.35	First60=26.16	4	Topology=o15-37i57-79o94-116i136-158o
638132531	714	ExpAA=211.80	First60=34.16	10	Topology=o10-32i44-66o96-115i122-141o156-178i198-220o235-257i323-342o372-394i406-428o
638144267	276	ExpAA=171.85	First60=41.02	8	Topology=o13-35i40-62o77-99i106-128o133-155i176-195o210-232i253-275o
638150228	152	ExpAA=89.30	First60=29.28	4	Topology=o4-26i52-74o84-106i127-149o
638150559	310	ExpAA=172.26	First60=25.65	8	Topology=o13-35i56-78o98-120i127-149o164-186i207-226o236-258i286-308o
638153036	313	ExpAA=170.60	First60=30.11	8	Topology=o13-35i56-78o93-115i122-139o159-181i194-216o231-253i284-306o
638180256	167	ExpAA=91.83	First60=30.93	4	Topology=o10-32i53-75o90-112i143-165o
638183641	143	ExpAA=88.30	First60=39.21	4	Topology=o5-27i44-66o76-98i119-141o
638190659	204	ExpAA=109.22	First60=30.84	5	Topology=i12-34o49-71i91-113o128-150i180-202o
638425336	541	ExpAA=194.15	First60=20.38	9	Topology=i7-26o151-170i191-213o233-255i260-277o297-319i332-354o369-391i403-425o
638428240	541	ExpAA=193.91	First60=20.39	9	Topology=i7-26o151-170i191-213o233-255i260-277o297-319i332-354o369-391i403-425o
638454166	544	ExpAA=195.69	First60=22.39	9	Topology=i7-29o151-170i183-202o228-250i257-279o294-316i337-359o369-391i403-425o
638482813	692	ExpAA=349.04	First60=24.29	16	Topology=i21-43o58-80i121-143o158-180i185-207o222-244i261-280o290-312i331-353o393-415i427-449o459-481i509-531o546-568i575-597o625-647i
638484736	641	ExpAA=354.67	First60=42.22	16	Topology=i2-24o39-61i92-114o134-156i163-185o200-222i235-257o272-294i306-328o371-388i409-431o436-458i483-505o515-537i550-572o598-620i
638513912	144	ExpAA=86.85	First60=38.01	4	Topology=o5-22i42-64o79-98i119-141o
638517890	308	ExpAA=176.98	First60=27.86	8	Topology=o13-35i56-78o98-120i127-149o169-191i204-226o241-263i284-306o
638518242	144	ExpAA=86.85	First60=38.01	4	Topology=o5-22i42-64o79-98i119-141o
638533186	314	ExpAA=170.68	First60=27.96	7	Topology=i13-35o55-74i94-116o159-181i194-216o231-253i284-306o
638535291	144	ExpAA=86.85	First60=38.01	4	Topology=o5-22i42-64o79-98i119-141o
638537120	308	ExpAA=176.98	First60=27.86	8	Topology=o13-35i56-78o98-120i127-149o169-191i204-226o241-263i284-306o
638537780	314	ExpAA=171.66	First60=28.41	7	Topology=i13-35o55-74i94-116o159-181i194-216o231-253i284-306o
638538976	144	ExpAA=86.84	First60=38.00	4	Topology=o5-22i42-64o79-98i119-141o
638539884	308	ExpAA=176.98	First60=27.86	8	Topology=o13-35i56-78o98-120i127-149o169-191i204-226o241-263i284-306o
638549350	314	ExpAA=171.66	First60=28.41	7	Topology=i13-35o55-74i94-116o159-181i194-216o231-253i284-306o
638549732	144	ExpAA=86.84	First60=38.00	4	Topology=o5-22i42-64o79-98i119-141o
638553094	308	ExpAA=176.98	First60=27.86	8	Topology=o13-35i56-78o98-120i127-149o169-191i204-226o241-263i284-306o
638555008	314	ExpAA=170.96	First60=27.96	7	Topology=i13-35o55-74i94-116o159-181i194-216o231-253i284-306o
638557060	308	ExpAA=176.98	First60=27.86	8	Topology=o13-35i56-78o98-120i127-149o169-191i204-226o241-263i284-306o
638557785	144	ExpAA=86.85	First60=38.00	4	Topology=o5-22i42-64o79-98i119-141o
638597028	144	ExpAA=86.85	First60=38.01	4	Topology=o5-22i42-64o79-98i119-141o
638601266	308	ExpAA=176.98	First60=27.86	8	Topology=o13-35i56-78o98-120i127-149o169-191i204-226o241-263i284-306o
638601881	144	ExpAA=86.85	First60=38.01	4	Topology=o5-22i42-64o79-98i119-141o
638606075	308	ExpAA=176.98	First60=27.86	8	Topology=o13-35i56-78o98-120i127-149o169-191i204-226o241-263i284-306o
638641763	549	ExpAA=195.11	First60=21.61	9	Topology=i12-34o156-175i188-207o233-255i262-284o299-321i342-364o374-396i408-430o
638657986	290	ExpAA=171.36	First60=31.77	8	Topology=o10-32i52-74o89-111i118-137o152-174i194-216o226-248i269-287o
638662184	290	ExpAA=173.47	First60=31.86	8	Topology=o11-30i51-73o93-110i117-136o151-170i190-212o227-249i262-284o
638667795	290	ExpAA=171.36	First60=31.77	8	Topology=o10-32i52-74o89-111i118-137o152-174i194-216o226-248i269-287o
638671416	290	ExpAA=174.07	First60=31.85	8	Topology=o11-30i51-73o93-110i115-137o152-170i190-212o227-249i262-284o
638676957	290	ExpAA=171.36	First60=31.77	8	Topology=o10-32i52-74o89-111i118-137o152-174i194-216o226-248i269-287o
638728725	347	ExpAA=193.67	First60=36.62	9	Topology=i7-26o46-68i92-114o134-152i159-178o193-215i222-244o259-278i290-312o
638741082	154	ExpAA=82.75	First60=30.39	4	Topology=o4-26i54-76o86-103i133-150o
638745961	144	ExpAA=83.74	First60=34.87	4	Topology=i5-27o49-71i84-106o121-143i
638746732	154	ExpAA=83.02	First60=30.24	4	Topology=o4-26i54-76o86-103i133-150o
638752053	144	ExpAA=83.74	First60=34.87	4	Topology=i5-27o49-71i84-106o121-143i
638755028	310	ExpAA=186.85	First60=28.83	8	Topology=o13-35i56-78o98-120i127-149o164-186i207-229o239-261i281-303o
638757055	313	ExpAA=172.22	First60=29.33	8	Topology=o13-35i56-75o95-117i124-139o159-181i194-216o231-253i284-306o
638759571	310	ExpAA=186.95	First60=28.85	8	Topology=o13-35i56-78o98-120i127-149o164-186i207-226o236-258i286-308o
638759875	152	ExpAA=89.60	First60=30.26	4	Topology=o4-26i52-74o84-106i127-149o
638773935	294	ExpAA=174.34	First60=37.46	8	Topology=o10-32i44-66o94-113i120-139o154-176i196-215o225-247i267-289o
638778999	294	ExpAA=174.25	First60=37.04	8	Topology=o15-37i44-66o94-113i120-139o154-176i196-215o225-247i267-289o
638784450	294	ExpAA=174.51	First60=36.93	8	Topology=o10-32i44-66o94-111i118-140o155-177i194-216o231-253i266-288o
638784927	294	ExpAA=174.47	First60=35.74	8	Topology=o15-32i44-66o94-113i120-139o154-176i196-215o225-247i268-290o
638849263	314	ExpAA=171.00	First60=27.96	7	Topology=i13-35o55-74i94-116o159-181i194-216o231-253i284-306o
638850154	130	ExpAA=66.47	First60=22.05	3	Topology=i30-52o62-84i105-127o
638850441	308	ExpAA=176.98	First60=27.86	8	Topology=o13-35i56-78o98-120i127-149o169-191i204-226o241-263i284-306o
638868350	290	ExpAA=173.48	First60=31.86	8	Topology=o11-30i51-73o93-110i117-136o151-170i190-212o227-249i262-284o
638873725	144	ExpAA=86.85	First60=38.00	4	Topology=o5-22i42-64o79-98i119-141o
638876289	314	ExpAA=171.66	First60=28.41	7	Topology=i13-35o55-74i94-116o159-181i194-216o231-253i284-306o
638877962	308	ExpAA=176.98	First60=27.86	8	Topology=o13-35i56-78o98-120i127-149o169-191i204-226o241-263i284-306o
638879993	644	ExpAA=342.59	First60=39.98	16	Topology=i5-27o42-64i84-106o116-138i150-169o184-203i216-238o248-270i291-310o344-366i378-400o415-437i465-487o497-519i531-553o583-605i
638883022	292	ExpAA=162.32	First60=32.98	7	Topology=i13-35o48-70i114-136o146-168i188-210o220-239i270-287o
638886812	292	ExpAA=173.28	First60=28.51	8	Topology=o20-39i52-74o94-116i123-140o150-172i193-212o222-244i265-287o
638913521	320	ExpAA=171.84	First60=29.73	8	Topology=o20-42i55-77o92-114i121-143o153-175i196-218o223-245i274-296o
638917398	281	ExpAA=174.09	First60=39.43	8	Topology=o10-32i44-66o81-103i110-132o136-158i179-198o213-235i256-278o
638932592	288	ExpAA=169.24	First60=35.19	8	Topology=o5-27i48-70o85-107i114-136o146-168i189-208o218-240i267-286o
638944297	284	ExpAA=176.27	First60=33.08	8	Topology=o7-29i50-72o94-116i121-143o153-172i185-207o217-239i260-282o
638969980	144	ExpAA=86.85	First60=38.01	4	Topology=o5-22i42-64o79-98i119-141o
638973693	308	ExpAA=176.98	First60=27.86	8	Topology=o13-35i56-78o98-120i127-149o169-191i204-226o241-263i284-306o
638985889	653	ExpAA=352.37	First60=31.40	16	Topology=i7-29o52-74i86-108o132-151i158-177o192-211i223-245o260-282i302-324o366-388i401-421o436-458i481-503o518-537i550-572o599-621i
638999702	153	ExpAA=86.35	First60=30.65	4	Topology=o10-32i53-75o90-112i125-147o
639047057	292	ExpAA=162.32	First60=32.98	7	Topology=i13-35o48-70i114-136o146-168i188-210o220-239i270-287o
639160541	314	ExpAA=176.38	First60=38.63	8	Topology=o10-32i44-66o90-112i119-141o156-178i203-225o240-262i283-305o
639187975	144	ExpAA=84.44	First60=34.81	4	Topology=i5-27o49-71i84-106o121-143i
639188737	154	ExpAA=82.75	First60=30.39	4	Topology=o4-26i54-76o86-103i133-150o
639303384	717	ExpAA=348.63	First60=22.62	16	Topology=i31-53o78-100i128-150o182-199i206-228o238-260i273-295o305-327i348-367o405-427i440-459o469-491i521-543o553-571i592-614o634-656i
639305417	548	ExpAA=188.90	First60=22.32	8	Topology=i9-31o152-171i192-209o229-251i258-277o292-314i334-356o371-393i
639309672	548	ExpAA=188.90	First60=22.32	8	Topology=i9-31o152-171i192-209o229-251i258-277o292-314i334-356o371-393i
639316947	717	ExpAA=348.63	First60=22.62	16	Topology=i31-53o78-100i128-150o182-199i206-228o238-260i273-295o305-327i348-367o405-427i440-459o469-491i521-543o553-571i592-614o634-656i
639319597	239	ExpAA=87.80	First60=41.78	4	Topology=i13-35o40-62i74-96o111-133i
639326661	154	ExpAA=82.75	First60=30.39	4	Topology=o4-26i54-76o86-103i133-150o
639327521	144	ExpAA=84.26	First60=34.27	4	Topology=i5-27o49-71i84-106o121-143i
639647017	219	ExpAA=103.91	First60=13.04	4	Topology=o76-98i118-140o155-177i190-212o
639687500	697	ExpAA=351.43	First60=22.85	16	Topology=i20-42o67-89i120-142o162-184i189-211o226-248i260-279o289-311i332-354o397-414i427-449o464-486i510-532o547-566i579-601o627-649i
639691740	718	ExpAA=351.02	First60=22.49	16	Topology=i36-58o78-100i121-143o173-191i196-218o233-255i276-298o308-330i351-373o416-438i451-473o483-505i529-551o566-585i598-620o646-668i
639694421	152	ExpAA=89.47	First60=30.50	4	Topology=o4-26i52-74o84-106i127-149o
639694734	310	ExpAA=186.90	First60=28.82	8	Topology=o13-35i56-78o98-120i127-149o164-186i207-229o239-261i281-303o
639695476	313	ExpAA=170.76	First60=29.83	8	Topology=o13-35i56-75o95-117i124-143o158-180i193-215o230-252i287-309o
639706999	541	ExpAA=193.61	First60=20.38	9	Topology=i7-26o150-169i190-212o232-254i261-278o298-320i332-354o369-391i403-425o
639720647	298	ExpAA=174.60	First60=34.49	8	Topology=o15-34i47-69o96-115i122-144o149-171i192-214o229-251i271-293o
639722903	133	ExpAA=66.80	First60=22.59	3	Topology=i30-52o62-84i110-132o
639735044	689	ExpAA=350.42	First60=23.46	16	Topology=i28-50o70-92i105-127o147-169i176-198o213-235i255-272o282-304i325-347o386-408i420-442o457-479i500-522o537-556i568-590o619-641i
639743136	666	ExpAA=348.47	First60=28.50	16	Topology=i7-29o56-78i91-113o140-162i167-184o199-221i241-260o270-292i311-333o370-392i404-426o436-458i488-510o520-542i555-574o603-625i
639744847	309	ExpAA=187.81	First60=39.08	9	Topology=i2-20o25-47i59-81o109-131i138-160o175-197i210-232o242-264i288-307o
639748876	549	ExpAA=195.71	First60=22.43	9	Topology=i12-34o156-175i188-207o234-256i268-290o300-322i342-364o374-396i408-430o
639766479	145	ExpAA=85.57	First60=22.42	4	Topology=i7-29o60-79i86-108o123-144i
639772311	513	ExpAA=196.33	First60=22.41	9	Topology=i9-31o140-162i174-196o211-233i235-257o267-286i299-321o336-358i371-393o
639787042	151	ExpAA=87.12	First60=36.23	4	Topology=o5-27i46-68o83-105i131-150o
639789341	641	ExpAA=348.77	First60=26.07	16	Topology=i13-35o60-82i95-117o145-164i171-188o203-225i238-260o270-289i310-332o369-391i403-425o435-457i482-504o519-541i554-573o600-622i
639793368	665	ExpAA=348.87	First60=24.09	16	Topology=i12-34o61-83i96-118o149-171i176-195o205-227i239-261o271-293i312-334o371-393i405-427o437-459i489-511o521-543i556-578o604-626i
639794838	309	ExpAA=192.39	First60=42.01	9	Topology=i7-26o36-58i71-93o118-140i145-167o177-199i211-233o243-265i286-308o
639796597	296	ExpAA=174.15	First60=37.37	8	Topology=o15-34i47-69o95-114i127-149o159-181i194-216o226-248i276-295o
639802509	751	ExpAA=348.38	First60=22.59	16	Topology=i34-56o79-101i121-143o173-191i193-215o230-252i273-295o305-327i347-369o410-432i444-466o481-503i528-550o565-584i597-619o645-667i
639803154	620	ExpAA=350.99	First60=39.31	16	Topology=i7-29o44-66i83-105o131-153i160-182o192-214i227-249o259-281i301-323o365-387i400-422o427-449i479-501o511-533i542-564o590-612i
639803295	701	ExpAA=349.20	First60=21.26	16	Topology=i20-42o65-87i120-142o170-189i194-216o231-253i258-280o295-317i337-359o402-416i437-459o469-491i515-537o552-571i584-606o632-654i
639807160	642	ExpAA=349.98	First60=25.65	16	Topology=i13-35o60-82i95-117o145-164i171-188o203-225i238-260o270-289i310-332o369-391i403-425o435-457i482-504o519-541i553-575o601-623i
639807537	672	ExpAA=347.95	First60=22.91	16	Topology=i19-41o61-83i104-126o146-168i175-194o209-231i244-266o276-295i316-338o376-398i410-432o442-464i494-516o526-548i561-583o609-631i
639809156	307	ExpAA=187.90	First60=41.23	9	Topology=i7-29o34-56i69-91o111-133i140-159o174-196i209-231o241-263i284-306o
639829038	661	ExpAA=346.80	First60=22.01	16	Topology=i25-47o67-89i113-135o155-173i180-199o214-236i243-265o280-299i311-333o370-389i401-423o438-460i483-505o520-539i552-574o597-619i
639833240	147	ExpAA=88.68	First60=31.52	4	Topology=o10-32i52-74o79-101i122-144o
639838719	159	ExpAA=90.58	First60=24.80	4	Topology=i13-35o60-82i94-116o136-158i
639840208	148	ExpAA=80.18	First60=31.76	3	Topology=o5-27i87-109o119-141i
639844970	152	ExpAA=89.29	First60=32.64	4	Topology=o4-26i49-71o84-106i127-149o
639846953	308	ExpAA=176.98	First60=27.86	8	Topology=o13-35i56-78o98-120i127-149o169-191i204-226o241-263i284-306o
639868380	210	ExpAA=112.16	First60=22.54	5	Topology=i31-53o66-88i108-130o140-162i182-204o
639869132	301	ExpAA=178.06	First60=27.83	8	Topology=o15-46i59-78o105-124i126-148o158-180i201-223o227-249i273-295o
640056498	676	ExpAA=350.56	First60=10.31	16	Topology=i50-69o92-114i127-149o174-196i201-223o238-260i273-295o305-326i346-368o405-427i440-462o472-494i528-550o555-577i589-611o637-659i
640075333	294	ExpAA=173.88	First60=36.91	8	Topology=o10-32i44-66o94-111i116-138o153-175i194-216o231-253i266-288o
640086862	147	ExpAA=86.84	First60=28.79	4	Topology=i2-24o56-78i85-107o122-144i
640090285	158	ExpAA=86.16	First60=32.72	4	Topology=o10-28i48-70o90-112i137-156o
640097625	308	ExpAA=176.98	First60=27.86	8	Topology=o13-35i56-78o98-120i127-149o169-191i204-226o241-263i284-306o
640097770	152	ExpAA=89.29	First60=32.64	4	Topology=o4-26i49-71o84-106i127-149o
640126667	308	ExpAA=176.98	First60=27.86	8	Topology=o13-35i56-78o98-120i127-149o169-191i204-226o241-263i284-306o
640127069	152	ExpAA=88.31	First60=29.88	4	Topology=o4-26i52-74o84-106i127-149o
640130657	314	ExpAA=170.94	First60=27.96	7	Topology=i13-35o55-74i94-116o159-181i194-216o231-253i284-306o
640133981	308	ExpAA=176.98	First60=27.86	8	Topology=o13-35i56-78o98-120i127-149o169-191i204-226o241-263i284-306o
640134379	152	ExpAA=89.38	First60=32.12	4	Topology=o4-26i52-74o84-106i127-149o
640140928	665	ExpAA=348.90	First60=24.09	16	Topology=i12-34o61-83i96-118o149-171i176-195o205-227i239-261o271-293i312-334o371-393i405-427o437-459i489-511o521-543i556-578o604-626i
640141788	632	ExpAA=173.24	First60=1.05	8	Topology=i145-167o182-204i217-236o264-286i307-329o344-366i379-398o418-440i
640142749	309	ExpAA=192.79	First60=42.14	9	Topology=i7-26o36-58i71-93o118-140i145-167o177-199i211-233o243-265i286-308o
640143731	315	ExpAA=170.87	First60=27.80	8	Topology=o10-32i53-75o97-116i123-140o160-182i195-217o232-254i285-307o
640150739	152	ExpAA=89.29	First60=32.64	4	Topology=o4-26i49-71o84-106i127-149o
640151115	308	ExpAA=176.98	First60=27.86	8	Topology=o13-35i56-78o98-120i127-149o169-191i204-226o241-263i284-306o
640155117	297	ExpAA=176.13	First60=31.10	8	Topology=o20-39i52-74o94-116i128-150o155-177i197-219o234-256i269-291o
640167885	311	ExpAA=175.26	First60=35.82	8	Topology=o10-32i45-67o96-115i122-144o159-181i202-221o236-258i279-301o
640168864	306	ExpAA=177.14	First60=34.49	8	Topology=o10-29i50-72o92-114i121-143o158-180i199-221o231-253i282-304o
640170282	148	ExpAA=83.30	First60=31.18	3	Topology=i50-72o77-99i126-147o
640171423	351	ExpAA=197.52	First60=22.84	9	Topology=i26-48o63-85i106-128o150-172i185-203o213-235i251-273o288-310i323-345o
640172062	674	ExpAA=350.10	First60=22.86	16	Topology=i20-42o69-91i104-126o156-175i182-203o213-235i248-270o280-302i315-337o379-396i408-430o445-467i495-517o527-549i562-584o611-633i
640173721	614	ExpAA=345.80	First60=34.43	16	Topology=i2-24o46-68i81-103o133-151i158-180o190-212i224-246o256-278i298-320o351-373i386-408o413-435i473-495o505-524i537-559o582-604i
640177234	635	ExpAA=333.66	First60=39.95	14	Topology=i5-27o42-64i151-173o188-210i227-249o259-278i285-307o340-362i374-396o411-433i461-483o498-517i530-552o579-601i
640179870	160	ExpAA=85.05	First60=26.90	4	Topology=o15-34i55-74o89-111i138-159o
640184297	313	ExpAA=170.10	First60=32.81	8	Topology=o15-37i50-72o94-116i123-142o162-184i196-218o233-255i287-309o
640188226	152	ExpAA=89.90	First60=29.62	4	Topology=o4-26i52-74o84-106i127-149o
640188556	311	ExpAA=179.51	First60=26.30	7	Topology=i7-29o101-120i127-149o169-191i203-225o240-262i282-304o
640429107	290	ExpAA=173.28	First60=31.86	8	Topology=o11-30i51-73o93-110i117-136o151-170i190-212o227-249i262-284o
640433511	222	ExpAA=129.26	First60=32.42	6	Topology=o20-42i49-68o83-102i122-144o159-181i194-216o
640442665	533	ExpAA=199.29	First60=22.64	9	Topology=i13-35o147-169i178-200o220-242i249-268o283-305i317-339o354-376i396-413o
640444896	310	ExpAA=176.10	First60=34.97	8	Topology=o6-28i49-71o91-113i118-140o155-177i198-220o235-257i287-309o
640445702	284	ExpAA=173.35	First60=39.23	8	Topology=o10-32i44-66o81-103i110-132o147-169i190-212o216-235i261-280o
640448606	175	ExpAA=84.41	First60=22.10	4	Topology=o29-51i72-94o109-131i152-174o
640452005	304	ExpAA=176.38	First60=38.97	8	Topology=o10-29i42-64o89-111i118-139o154-176i196-218o228-250i278-300o
640455322	297	ExpAA=173.62	First60=30.09	8	Topology=o24-46i59-81o105-127i132-154o164-186i199-221o231-253i274-296o
640456782	676	ExpAA=348.91	First60=22.51	16	Topology=i19-41o61-83i104-126o146-168i175-194o209-231i251-268o278-300i320-342o380-402i414-436o446-468i498-520o530-552i565-587o613-635i
640457047	646	ExpAA=350.67	First60=22.85	16	Topology=i13-35o64-86i99-121o149-168i175-192o207-229i242-264o274-293i314-336o373-395i407-429o439-461i486-508o523-545i557-579o605-627i
640459556	641	ExpAA=348.77	First60=26.07	16	Topology=i13-35o60-82i95-117o145-164i171-188o203-225i238-260o270-289i310-332o369-391i403-425o435-457i482-504o519-541i554-573o600-622i
640459593	637	ExpAA=349.52	First60=26.07	16	Topology=i13-35o60-82i95-117o145-164i171-188o203-225i238-260o270-289i310-332o369-391i404-426o436-458i482-504o519-541i554-573o600-622i
640459994	673	ExpAA=351.71	First60=22.52	16	Topology=i34-56o81-103i124-146o172-194i201-218o233-255i268-290o305-327i340-362o399-421i434-456o466-488i517-539o549-571i584-606o633-652i
640462299	717	ExpAA=348.55	First60=22.62	16	Topology=i31-53o78-100i128-150o182-199i206-228o238-260i273-295o305-327i348-367o405-427i440-459o469-491i521-543o553-571i592-614o634-656i
640472439	651	ExpAA=343.45	First60=36.82	16	Topology=i2-24o39-61i82-104o124-146i151-173o183-205i218-240o253-275i288-310o352-371i383-405o415-437i467-489o499-521i534-556o583-605i
640473390	607	ExpAA=201.88	First60=6.98	9	Topology=i64-86o215-234i247-266o286-308i321-340o355-377i390-412o427-449i462-484o
640478188	294	ExpAA=173.71	First60=36.38	8	Topology=o10-32i44-66o94-111i118-140o155-177i194-216o231-253i266-288o
640486902	144	ExpAA=86.81	First60=35.39	4	Topology=o5-27i47-69o84-106i119-141o
640487475	154	ExpAA=83.72	First60=30.96	4	Topology=o4-26i52-74o84-106i133-150o
640492594	290	ExpAA=172.85	First60=32.14	8	Topology=o10-32i52-74o89-111i118-137o152-174i195-217o227-249i262-284o
640502655	154	ExpAA=80.70	First60=31.19	4	Topology=o10-32i53-75o85-103i133-150o
640520405	552	ExpAA=289.68	First60=23.99	13	Topology=o15-37i58-80o95-114i121-140o155-177i198-220o230-252i273-295o376-395i402-424o439-456i468-490o530-547i
640521748	523	ExpAA=198.64	First60=21.81	9	Topology=i7-29o135-157i170-192o212-234i241-263o273-295i308-330o341-363i384-406o
640539029	309	ExpAA=175.21	First60=36.57	8	Topology=o11-33i46-68o88-110i117-139o159-178i198-220o235-257i285-307o
640542285	659	ExpAA=352.15	First60=31.49	16	Topology=i13-35o50-72i93-115o130-152i159-176o191-213i225-247o257-279i300-322o366-388i401-420o430-452i481-503o518-537i550-572o599-621i
640557425	621	ExpAA=213.45	First60=23.70	10	Topology=o15-37i58-80o100-122i129-146o161-183i196-218o233-255i268-290o322-341i346-363o
640560183	552	ExpAA=285.85	First60=24.41	13	Topology=o15-37i58-80o95-117i124-146o161-183i196-218o233-255i276-298o376-395i402-424o439-456i468-490o530-547i
640582173	290	ExpAA=175.69	First60=37.52	8	Topology=o5-27i46-68o83-105i112-134o149-168i187-209o219-241i262-284o
640585618	154	ExpAA=84.03	First60=30.36	4	Topology=o10-29i49-71o86-108i134-153o
640595109	590	ExpAA=200.29	First60=20.59	9	Topology=i5-27o167-189i202-224o244-261i268-290o301-323i344-366o381-403i424-446o
640598985	146	ExpAA=81.18	First60=30.81	4	Topology=o5-27i47-69o84-106i119-141o
640600764	661	ExpAA=346.80	First60=22.01	16	Topology=i25-47o67-89i113-135o155-173i180-199o214-236i243-265o280-299i311-333o370-389i401-423o438-460i483-505o520-539i552-574o597-619i
640604843	661	ExpAA=346.80	First60=22.01	16	Topology=i25-47o67-89i113-135o155-173i180-199o214-236i243-265o280-299i311-333o370-389i401-423o438-460i483-505o520-539i552-574o597-619i
640635835	151	ExpAA=81.90	First60=30.73	4	Topology=o4-26i53-70o80-102i130-147o
640636205	300	ExpAA=175.07	First60=35.44	8	Topology=o15-36i49-71o97-116i129-151o161-183i195-217o232-254i275-297o
640640126	165	ExpAA=87.99	First60=21.50	4	Topology=o24-43i63-85o95-117i139-161o
640653234	288	ExpAA=167.10	First60=37.61	8	Topology=o5-27i48-70o85-107i114-136o146-165i185-207o222-244i265-287o
640657501	308	ExpAA=177.07	First60=27.95	8	Topology=o13-35i56-78o98-120i127-149o169-191i204-226o241-263i284-306o
640660901	315	ExpAA=170.57	First60=27.80	8	Topology=o10-32i53-75o97-116i123-140o160-182i195-217o232-254i285-307o
640738300	289	ExpAA=173.05	First60=31.86	8	Topology=o10-32i52-74o89-111i118-137o152-169i189-211o226-248i261-283o
640742002	289	ExpAA=173.05	First60=31.86	8	Topology=o10-32i52-74o89-111i118-137o152-169i189-211o226-248i261-283o
640754732	290	ExpAA=173.24	First60=31.91	8	Topology=o11-30i51-73o93-110i117-136o151-170i190-212o227-249i262-284o
640799398	289	ExpAA=169.70	First60=37.29	8	Topology=o11-33i46-68o88-110i119-138o153-172i193-215o225-247i268-286o
640802012	309	ExpAA=174.27	First60=37.76	8	Topology=o4-26i47-66o93-115i120-142o157-179i200-222o237-259i282-304o
640813384	154	ExpAA=82.46	First60=30.08	4	Topology=o4-26i54-76o86-103i133-150o
640814296	144	ExpAA=83.31	First60=34.35	4	Topology=i5-27o49-71i84-106o121-143i
640816230	310	ExpAA=176.12	First60=38.19	8	Topology=o10-32i45-67o94-113i120-142o157-179i199-221o236-258i287-309o
640817177	306	ExpAA=176.91	First60=33.09	8	Topology=o10-29i50-72o92-114i119-141o156-178i199-221o231-253i282-304o
640818715	148	ExpAA=85.44	First60=36.28	4	Topology=i7-26o41-63i76-98o126-147i
640827944	671	ExpAA=351.99	First60=23.73	16	Topology=i21-43o63-85i98-120o140-162i169-191o201-223i244-266o281-303i316-338o380-397i410-432o447-469i493-515o530-549i562-584o610-632i
640865327	294	ExpAA=173.70	First60=36.38	8	Topology=o10-32i44-66o94-111i118-140o155-177i194-216o231-253i266-288o
640871467	147	ExpAA=83.64	First60=30.79	4	Topology=o10-32i53-75o90-109i129-146o
640879666	576	ExpAA=227.55	First60=27.76	10	Topology=o10-27i48-70o189-211i224-246o266-285i292-314o324-346i359-381o391-413i441-458o
640884468	542	ExpAA=192.89	First60=21.41	9	Topology=i7-29o147-166i178-200o227-249i256-278o293-315i336-355o370-392i404-426o
640894757	613	ExpAA=195.68	First60=21.64	9	Topology=i23-45o185-207i220-242o262-284i291-310o320-342i362-384o399-421i442-464o
640899553	289	ExpAA=175.11	First60=36.50	8	Topology=o10-32i45-67o92-111i116-138o148-170i195-217o227-249i262-284o
640902400	309	ExpAA=174.29	First60=37.76	8	Topology=o4-26i47-66o93-115i120-142o157-179i200-222o237-259i282-304o
640915092	290	ExpAA=174.55	First60=31.57	8	Topology=o11-30i51-73o93-111i118-137o152-174i194-216o226-248i261-283o
640921076	290	ExpAA=173.30	First60=31.86	8	Topology=o11-30i51-73o93-110i117-136o151-170i190-212o227-249i262-284o
640925739	290	ExpAA=171.36	First60=31.77	8	Topology=o10-32i52-74o89-111i118-137o152-174i194-216o226-248i269-287o
640930641	739	ExpAA=351.43	First60=22.80	16	Topology=i26-48o77-99i170-192o212-234i241-263o273-292i304-326o336-358i379-401o443-462i475-497o512-534i562-584o589-611i620-642o674-696i
640937482	293	ExpAA=172.03	First60=35.79	8	Topology=o15-33i46-68o94-111i118-140o155-177i198-220o230-252i265-287o
640940806	309	ExpAA=174.27	First60=37.76	8	Topology=o4-26i47-66o93-115i120-142o157-179i200-222o237-259i282-304o
640944993	544	ExpAA=193.01	First60=22.11	9	Topology=i7-29o148-170i183-202o229-251i258-280o295-317i338-357o372-394i406-428o
640965012	541	ExpAA=193.99	First60=20.39	9	Topology=i7-26o151-170i191-213o233-255i260-277o297-319i332-354o369-391i403-425o
640967735	541	ExpAA=194.13	First60=20.38	9	Topology=i7-26o151-170i191-213o233-255i260-277o297-319i332-354o369-391i403-425o
640983124	541	ExpAA=193.93	First60=20.39	9	Topology=i7-26o151-170i191-213o233-255i260-277o297-319i332-354o369-391i403-425o
641104154	294	ExpAA=173.71	First60=36.38	8	Topology=o10-32i44-66o94-111i118-140o155-177i194-216o231-253i266-288o
641121373	147	ExpAA=81.27	First60=29.65	3	Topology=i5-27o80-102i123-145o
641146603	151	ExpAA=84.15	First60=30.71	4	Topology=o4-26i51-73o83-105i130-147o
641210696	309	ExpAA=174.27	First60=37.76	8	Topology=o4-26i47-66o93-115i120-142o157-179i200-222o237-259i282-304o
641211291	309	ExpAA=174.28	First60=37.76	8	Topology=o4-26i47-66o93-115i120-142o157-179i200-222o237-259i282-304o
641230143	115	ExpAA=67.09	First60=33.20	3	Topology=i13-35o50-72i85-107o
641241388	719	ExpAA=351.27	First60=35.08	16	Topology=i7-29o49-71i84-106o126-148i155-177o187-209i230-252o262-282i338-360o398-420i433-455o465-487i519-541o546-568i581-603o630-652i
641246078	649	ExpAA=193.42	First60=7.73	9	Topology=i53-75o198-220i233-255o275-294i322-344o359-381i431-448o463-485i513-535o
641249603	148	ExpAA=90.25	First60=32.98	4	Topology=i7-29o49-71i83-105o125-147i
641269712	679	ExpAA=350.18	First60=22.78	16	Topology=i20-42o68-87i108-130o150-172i179-201o211-233i246-268o281-303i316-338o370-392i413-435o445-467i495-517o527-549i562-584o611-633i
641270472	510	ExpAA=195.69	First60=22.37	9	Topology=i5-27o168-190i211-230o254-276i336-358o368-390i407-429o439-461i487-509o
641270529	551	ExpAA=194.16	First60=21.79	9	Topology=i12-34o159-178i191-210o230-252i265-284o299-321i334-356o371-393i406-428o
641295507	308	ExpAA=174.56	First60=37.42	8	Topology=o10-32i45-67o92-114i121-143o158-180i200-222o232-254i282-304o
641304241	291	ExpAA=172.33	First60=31.08	8	Topology=o10-32i52-74o94-113i120-137o152-174i195-217o227-249i270-288o
641307959	313	ExpAA=165.68	First60=32.76	8	Topology=o6-28i49-71o94-116i123-142o162-184i196-218o233-255i283-305o
641313044	310	ExpAA=183.18	First60=28.03	8	Topology=o13-35i56-78o98-120i127-149o164-186i207-226o236-258i286-308o
641313334	152	ExpAA=89.13	First60=31.15	4	Topology=o4-26i52-74o84-106i127-149o
641314785	317	ExpAA=179.55	First60=33.90	8	Topology=o7-29i50-72o87-109i121-140o160-182i203-225o240-262i283-305o
641317306	927	ExpAA=197.56	First60=7.01	9	Topology=o145-167i188-210o230-247i259-281o291-313i334-356o367-389i420-439o895-912i
641317388	165	ExpAA=89.07	First60=27.54	4	Topology=o13-35i56-78o93-115i141-163o
641321734	291	ExpAA=172.22	First60=31.29	8	Topology=o10-32i52-74o94-113i120-137o152-174i195-217o227-249i270-288o
641337000	150	ExpAA=86.63	First60=30.02	4	Topology=o10-32i53-75o85-107i128-147o
641339568	294	ExpAA=173.71	First60=36.38	8	Topology=o10-32i44-66o94-111i118-140o155-177i194-216o231-253i266-288o
641357993	701	ExpAA=347.34	First60=22.83	16	Topology=i28-50o70-92i118-140o169-187i189-211o226-245i266-288o298-317i337-359o402-419i432-454o469-491i515-537o552-571i584-606o632-654i
641364555	134	ExpAA=64.63	First60=21.80	3	Topology=i27-49o69-91i116-133o
641365349	305	ExpAA=175.42	First60=39.41	8	Topology=o7-29i42-64o89-111i118-140o155-177i197-219o229-251i279-301o
641376969	547	ExpAA=194.81	First60=21.37	9	Topology=i7-29o154-173i186-205o233-255i260-282o297-319i340-362o372-394i406-428o
641431432	153	ExpAA=88.48	First60=34.15	4	Topology=o5-27i47-69o84-106i127-149o
641549425	154	ExpAA=84.21	First60=30.30	4	Topology=o10-29i49-71o86-108i134-153o
641562837	305	ExpAA=177.72	First60=39.41	8	Topology=o15-37i44-66o86-108i115-133o153-175i196-218o228-250i279-301o
641579286	669	ExpAA=349.97	First60=24.07	16	Topology=i13-35o62-84i97-119o148-167i174-195o205-227i239-261o271-293i312-334o374-391i403-425o440-462i490-512o522-544i557-576o606-628i
641591877	304	ExpAA=177.15	First60=25.85	8	Topology=o23-45i58-80o106-123i135-157o162-184i204-226o241-263i276-298o
641597502	294	ExpAA=175.36	First60=37.45	8	Topology=o15-40i47-69o94-111i118-140o155-177i194-216o231-253i266-288o
641601207	290	ExpAA=173.30	First60=31.86	8	Topology=o11-30i51-73o93-110i117-136o151-170i190-212o227-249i262-284o
641602825	309	ExpAA=174.27	First60=37.76	8	Topology=o4-26i47-66o93-115i120-142o157-179i200-222o237-259i282-304o
641607450	290	ExpAA=173.32	First60=31.86	8	Topology=o11-30i51-73o93-110i117-136o151-170i190-212o227-249i262-284o
641616225	290	ExpAA=173.75	First60=31.92	8	Topology=o11-30i51-73o88-110i117-136o151-170i190-212o227-249i262-284o
641620910	154	ExpAA=82.20	First60=29.34	4	Topology=o10-29i54-76o86-108i134-153o
641638968	152	ExpAA=89.47	First60=30.50	4	Topology=o4-26i52-74o84-106i127-149o
641639289	310	ExpAA=186.85	First60=28.83	8	Topology=o13-35i56-78o98-120i127-149o164-186i207-229o239-261i281-303o
641651207	313	ExpAA=171.05	First60=30.31	8	Topology=o13-35i56-75o95-117i124-146o159-181i194-216o231-253i287-309o
641673804	766	ExpAA=345.05	First60=22.65	16	Topology=i21-43o70-92i113-131o151-173i180-200o215-237i250-272o282-304i330-352o391-413i425-447o457-479i509-531o541-563i576-595o625-647i
641682049	152	ExpAA=89.85	First60=29.25	4	Topology=o4-26i52-74o84-106i127-149o
641682368	310	ExpAA=172.26	First60=25.65	8	Topology=o13-35i56-78o98-120i127-149o164-186i207-226o236-258i286-308o
641683125	306	ExpAA=170.79	First60=36.49	8	Topology=o6-28i49-71o86-108i115-132o152-174i187-209o224-246i277-299o
641696397	349	ExpAA=175.33	First60=16.29	8	Topology=o44-66i120-142o157-174i179-196o206-228i248-265o280-302i323-345o
641697956	648	ExpAA=186.92	First60=22.49	8	Topology=i21-43o168-190i203-225o251-273i285-307o322-344i353-375o390-412i
641707428	316	ExpAA=172.20	First60=31.76	8	Topology=i7-29o49-71i92-114o124-143i156-178o207-229i242-264o288-307i
641726151	290	ExpAA=173.34	First60=31.86	8	Topology=o11-30i51-73o93-110i117-136o151-170i190-212o227-249i262-284o
641735578	169	ExpAA=89.67	First60=24.09	4	Topology=o15-39i60-82o97-119i145-167o
641735823	927	ExpAA=211.72	First60=19.74	10	Topology=i7-24o148-170i191-213o228-250i262-284o299-321i337-359o374-396i423-442o894-911i
641743233	556	ExpAA=172.38	First60=17.35	8	Topology=o5-22i162-179o237-256i263-282o288-310i331-353o363-385i397-419o
641762633	541	ExpAA=193.69	First60=20.38	9	Topology=i7-26o151-170i191-213o233-255i260-277o297-319i332-354o369-391i403-425o
641765298	541	ExpAA=194.01	First60=20.39	9	Topology=i7-26o151-170i191-213o233-255i260-277o297-319i332-354o369-391i403-425o
641785697	661	ExpAA=346.80	First60=22.01	16	Topology=i25-47o67-89i113-135o155-173i180-199o214-236i243-265o280-299i311-333o370-389i401-423o438-460i483-505o520-539i552-574o597-619i
641789247	294	ExpAA=173.71	First60=36.38	8	Topology=o10-32i44-66o94-111i118-140o155-177i194-216o231-253i266-288o
641825539	294	ExpAA=173.71	First60=36.38	8	Topology=o10-32i44-66o94-111i118-140o155-177i194-216o231-253i266-288o
641828706	294	ExpAA=173.71	First60=36.38	8	Topology=o10-32i44-66o94-111i118-140o155-177i194-216o231-253i266-288o
641834280	294	ExpAA=173.71	First60=36.38	8	Topology=o10-32i44-66o94-111i118-140o155-177i194-216o231-253i266-288o
641835721	294	ExpAA=173.71	First60=36.38	8	Topology=o10-32i44-66o94-111i118-140o155-177i194-216o231-253i266-288o
641842838	294	ExpAA=173.71	First60=36.38	8	Topology=o10-32i44-66o94-111i118-140o155-177i194-216o231-253i266-288o
641845644	152	ExpAA=89.29	First60=32.64	4	Topology=o4-26i49-71o84-106i127-149o
641851353	308	ExpAA=176.98	First60=27.86	8	Topology=o13-35i56-78o98-120i127-149o169-191i204-226o241-263i284-306o
641858451	291	ExpAA=172.08	First60=31.19	8	Topology=o10-32i52-74o94-113i120-137o152-174i195-217o227-249i270-288o
641876044	291	ExpAA=172.21	First60=31.27	8	Topology=o10-32i52-74o94-113i120-137o152-174i195-217o227-249i270-288o
641882150	291	ExpAA=172.28	First60=31.27	8	Topology=o10-32i52-74o94-113i120-137o152-174i195-217o227-249i270-288o
641893043	294	ExpAA=173.71	First60=36.38	8	Topology=o10-32i44-66o94-111i118-140o155-177i194-216o231-253i266-288o
641899742	315	ExpAA=171.85	First60=27.18	8	Topology=o13-35i55-77o97-119i126-143o158-180i193-215o230-252i285-307o
641900945	308	ExpAA=177.90	First60=27.54	8	Topology=o13-35i56-78o98-120i127-149o169-191i204-226o241-263i284-306o
641901293	152	ExpAA=89.26	First60=30.61	4	Topology=o4-26i52-74o84-106i127-149o
641905352	313	ExpAA=168.21	First60=29.46	8	Topology=o13-35i55-74o94-116i123-142o162-184i196-218o233-255i283-305o
641906448	152	ExpAA=89.83	First60=30.93	4	Topology=o4-26i52-74o84-106i127-149o
641912263	308	ExpAA=178.19	First60=27.88	8	Topology=o13-35i56-78o98-120i127-149o169-191i204-226o236-258i281-303o
641912644	152	ExpAA=89.42	First60=31.47	4	Topology=o4-26i52-74o84-106i127-149o
641915800	315	ExpAA=163.19	First60=28.96	7	Topology=i7-29o52-74i94-116o159-181i194-216o231-253i285-307o
641919511	308	ExpAA=178.19	First60=27.88	8	Topology=o13-35i56-78o98-120i127-149o169-191i204-226o236-258i281-303o
641919914	152	ExpAA=89.42	First60=31.47	4	Topology=o4-26i52-74o84-106i127-149o
641925590	315	ExpAA=162.73	First60=28.78	7	Topology=i7-29o52-74i94-116o159-181i194-216o231-253i285-307o
641928074	315	ExpAA=171.85	First60=27.18	8	Topology=o13-35i55-77o97-119i126-143o158-180i193-215o230-252i285-307o
641929615	152	ExpAA=89.26	First60=30.61	4	Topology=o4-26i52-74o84-106i127-149o
641933982	152	ExpAA=89.35	First60=32.14	4	Topology=o4-26i52-74o84-106i127-149o
641937902	314	ExpAA=170.96	First60=27.96	7	Topology=i13-35o55-74i94-116o159-181i194-216o231-253i284-306o
641942153	174	ExpAA=89.78	First60=23.73	4	Topology=o34-56i68-90o105-127i147-169o
641942591	152	ExpAA=89.29	First60=32.64	4	Topology=o4-26i49-71o84-106i127-149o
641946476	314	ExpAA=171.66	First60=28.41	7	Topology=i13-35o55-74i94-116o159-181i194-216o231-253i284-306o
641950519	158	ExpAA=89.03	First60=31.59	4	Topology=o15-37i54-76o91-113i134-156o
641954906	314	ExpAA=170.68	First60=27.96	7	Topology=i13-35o55-74i94-116o159-181i194-216o231-253i284-306o
641958003	152	ExpAA=89.35	First60=32.14	4	Topology=o4-26i52-74o84-106i127-149o
641958847	169	ExpAA=89.43	First60=23.56	4	Topology=o29-51i63-85o100-122i142-164o
641959284	152	ExpAA=89.35	First60=32.14	4	Topology=o4-26i52-74o84-106i127-149o
641963122	314	ExpAA=170.68	First60=27.96	7	Topology=i13-35o55-74i94-116o159-181i194-216o231-253i284-306o
641966998	308	ExpAA=178.31	First60=27.91	8	Topology=o13-35i56-78o98-120i127-149o169-191i204-226o241-263i284-306o
641967375	130	ExpAA=66.79	First60=22.40	3	Topology=i30-52o62-84i105-127o
641974568	196	ExpAA=111.15	First60=28.26	5	Topology=i7-29o56-78i90-112o127-149i169-191o
641974985	152	ExpAA=89.30	First60=32.62	4	Topology=o4-26i49-71o84-106i127-149o
641978773	259	ExpAA=141.80	First60=34.84	7	Topology=i7-26o41-60i67-84o104-126i139-161o176-198i229-251o
641982789	187	ExpAA=109.85	First60=35.94	5	Topology=i7-28o48-70i83-105o120-142i163-185o
641983225	152	ExpAA=89.43	First60=32.16	4	Topology=o4-26i52-74o84-106i127-149o
641987054	314	ExpAA=170.68	First60=27.96	7	Topology=i13-35o55-74i94-116o159-181i194-216o231-253i284-306o
641991139	190	ExpAA=110.08	First60=33.12	5	Topology=i7-29o49-71i84-106o121-143i163-185o
641991554	152	ExpAA=89.35	First60=32.14	4	Topology=o4-26i52-74o84-106i127-149o
641995374	314	ExpAA=171.66	First60=28.41	7	Topology=i13-35o55-74i94-116o159-181i194-216o231-253i284-306o
641999667	152	ExpAA=89.30	First60=32.62	4	Topology=o4-26i49-71o84-106i127-149o
642001814	308	ExpAA=176.98	First60=27.86	8	Topology=o13-35i56-78o98-120i127-149o169-191i204-226o241-263i284-306o
642003395	314	ExpAA=171.02	First60=27.96	7	Topology=i13-35o55-74i94-116o159-181i194-216o231-253i284-306o
642007375	308	ExpAA=176.98	First60=27.86	8	Topology=o13-35i56-78o98-120i127-149o169-191i204-226o241-263i284-306o
642007805	152	ExpAA=89.36	First60=32.67	4	Topology=o4-26i49-71o84-106i127-149o
642011505	314	ExpAA=170.68	First60=27.96	7	Topology=i13-35o55-74i94-116o159-181i194-216o231-253i284-306o
642121543	291	ExpAA=172.08	First60=31.19	8	Topology=o10-32i52-74o94-113i120-137o152-174i195-217o227-249i270-288o
642126399	291	ExpAA=172.23	First60=31.27	8	Topology=o10-32i52-74o94-113i120-137o152-174i195-217o227-249i270-288o
642134797	291	ExpAA=172.21	First60=31.27	8	Topology=o10-32i52-74o94-113i120-137o152-174i195-217o227-249i270-288o
642155669	291	ExpAA=172.20	First60=31.26	8	Topology=o10-32i52-74o94-113i120-137o152-174i195-217o227-249i270-288o
642167082	291	ExpAA=172.21	First60=31.30	8	Topology=o10-32i52-74o94-113i120-137o152-174i195-217o227-249i270-288o
642170221	291	ExpAA=172.21	First60=31.30	8	Topology=o10-32i52-74o94-113i120-137o152-174i195-217o227-249i270-288o
642276070	290	ExpAA=172.91	First60=31.99	8	Topology=o11-30i51-73o93-110i117-136o151-170i190-212o227-249i262-284o
642282050	290	ExpAA=172.91	First60=31.99	8	Topology=o11-30i51-73o93-110i117-136o151-170i190-212o227-249i262-284o
642287917	290	ExpAA=172.91	First60=31.99	8	Topology=o11-30i51-73o93-110i117-136o151-170i190-212o227-249i262-284o
642295017	290	ExpAA=172.91	First60=31.99	8	Topology=o11-30i51-73o93-110i117-136o151-170i190-212o227-249i262-284o
642301078	290	ExpAA=172.91	First60=31.99	8	Topology=o11-30i51-73o93-110i117-136o151-170i190-212o227-249i262-284o
642305514	290	ExpAA=172.91	First60=31.99	8	Topology=o11-30i51-73o93-110i117-136o151-170i190-212o227-249i262-284o
642312671	290	ExpAA=172.91	First60=31.99	8	Topology=o11-30i51-73o93-110i117-136o151-170i190-212o227-249i262-284o
642320639	290	ExpAA=172.91	First60=31.99	8	Topology=o11-30i51-73o93-110i117-136o151-170i190-212o227-249i262-284o
642340572	549	ExpAA=195.63	First60=21.80	9	Topology=i12-34o156-175i188-207o234-256i268-290o300-322i342-364o374-396i408-430o
642343618	298	ExpAA=177.32	First60=37.20	8	Topology=o15-34i47-69o89-111i118-140o155-177i198-220o235-257i270-292o
642366628	549	ExpAA=195.63	First60=21.80	9	Topology=i12-34o156-175i188-207o234-256i268-290o300-322i342-364o374-396i408-430o
642372003	549	ExpAA=195.63	First60=21.80	9	Topology=i12-34o156-175i188-207o234-256i268-290o300-322i342-364o374-396i408-430o
642404987	309	ExpAA=174.27	First60=37.76	8	Topology=o4-26i47-66o93-115i120-142o157-179i200-222o237-259i282-304o
642407607	290	ExpAA=174.81	First60=32.25	8	Topology=o10-32i52-74o89-111i118-137o152-174i194-216o226-248i261-283o
642410243	549	ExpAA=195.63	First60=21.80	9	Topology=i12-34o156-175i188-207o234-256i268-290o300-322i342-364o374-396i408-430o
642414101	313	ExpAA=168.74	First60=29.74	8	Topology=o13-35i56-78o93-115i122-139o159-181i194-216o231-253i284-306o
642416008	310	ExpAA=185.27	First60=28.80	8	Topology=o13-35i56-78o98-120i127-149o164-186i207-226o236-258i286-308o
642417608	152	ExpAA=89.30	First60=29.28	4	Topology=o4-26i52-74o84-106i127-149o
642421007	314	ExpAA=170.71	First60=28.39	8	Topology=o15-34i55-74o96-115i122-139o159-181i194-216o231-253i283-305o
642422691	152	ExpAA=87.71	First60=31.91	4	Topology=i7-29o49-71i84-106o126-148i
642424249	309	ExpAA=176.88	First60=27.77	8	Topology=o13-35i56-78o93-115i128-150o165-187i199-221o236-256i277-299o
642429340	549	ExpAA=195.63	First60=21.80	9	Topology=i12-34o156-175i188-207o234-256i268-290o300-322i342-364o374-396i408-430o
642440119	310	ExpAA=171.82	First60=25.65	8	Topology=o13-35i56-78o98-120i127-149o164-186i207-226o236-258i286-308o
642440292	152	ExpAA=89.77	First60=29.26	4	Topology=o4-26i52-74o84-106i127-149o
642442388	313	ExpAA=169.72	First60=27.43	8	Topology=o13-35i56-78o93-115i122-139o159-181i194-216o231-253i284-306o
642459960	549	ExpAA=195.63	First60=21.80	9	Topology=i12-34o156-175i188-207o234-256i268-290o300-322i342-364o374-396i408-430o
642575503	618	ExpAA=328.44	First60=34.26	15	Topology=o15-32i52-74o89-111i118-135o150-172i184-206o216-238i259-281o325-347i360-379o389-411i440-462o477-496i509-531o558-580i
642577385	299	ExpAA=175.65	First60=37.36	8	Topology=o10-32i44-66o94-111i118-140o155-177i198-220o238-260i273-295o
642589727	720	ExpAA=349.95	First60=22.51	16	Topology=i35-57o77-99i135-157o177-199i204-226o241-263i292-314o324-343i363-385o427-449i462-484o494-516i540-562o577-596i609-631o658-680i
642592195	309	ExpAA=175.10	First60=26.17	8	Topology=o10-32i59-81o96-118i125-147o167-189i202-224o234-256i277-299o
642593830	313	ExpAA=164.48	First60=31.23	8	Topology=o10-29i50-72o96-115i127-144o159-181i194-216o231-253i283-305o
642593914	152	ExpAA=86.69	First60=30.73	4	Topology=i7-29o49-71i84-106o126-148i
642607939	294	ExpAA=175.36	First60=37.45	8	Topology=o15-40i47-69o94-111i118-140o155-177i194-216o231-253i266-288o
642619085	314	ExpAA=165.44	First60=26.15	7	Topology=i7-29o53-70i96-118o160-182i195-217o232-254i285-307o
642620766	152	ExpAA=86.90	First60=30.83	4	Topology=i7-29o49-71i84-106o126-148i
642622880	311	ExpAA=176.46	First60=27.86	8	Topology=o13-35i56-78o93-115i128-150o160-182i202-224o234-256i277-299o
642625286	309	ExpAA=176.39	First60=37.10	8	Topology=o10-32i45-67o87-109i122-144o159-181i201-223o233-255i283-305o
642625340	309	ExpAA=177.04	First60=37.09	8	Topology=o10-32i45-67o87-109i122-144o159-181i201-223o233-255i283-305o
642625399	309	ExpAA=177.82	First60=38.42	8	Topology=o10-32i45-67o93-115i120-142o157-179i200-222o237-259i283-305o
642657564	149	ExpAA=84.99	First60=34.23	4	Topology=i5-27o50-72i93-111o121-143i
642667588	313	ExpAA=165.68	First60=32.76	8	Topology=o6-28i49-71o94-116i123-142o162-184i196-218o233-255i283-305o
642669315	136	ExpAA=72.73	First60=18.26	3	Topology=i51-70o74-96i117-135o
642670997	317	ExpAA=179.55	First60=33.90	8	Topology=o7-29i50-72o87-109i121-140o160-182i203-225o240-262i283-305o
642672417	152	ExpAA=89.13	First60=31.15	4	Topology=o4-26i52-74o84-106i127-149o
642672702	310	ExpAA=183.18	First60=28.03	8	Topology=o13-35i56-78o98-120i127-149o164-186i207-226o236-258i286-308o
642675595	308	ExpAA=110.72	First60=19.88	5	Topology=i9-28o84-106i118-140o155-177i283-305o
642693525	313	ExpAA=174.72	First60=41.28	8	Topology=o6-28i40-62o96-115i128-150o160-182i202-224o244-266i289-311o
642693762	294	ExpAA=167.94	First60=40.36	8	Topology=o10-27i34-52o83-105i110-129o144-166i187-209o224-246i266-288o
642713153	528	ExpAA=197.99	First60=24.62	9	Topology=i7-29o139-161i168-190o217-239i246-268o278-300i312-334o349-367i388-410o
642720238	149	ExpAA=86.43	First60=22.24	4	Topology=o10-32i64-86o90-112i125-147o
642727283	145	ExpAA=85.81	First60=22.77	4	Topology=i7-29o60-82i84-106o121-143i
642731346	294	ExpAA=168.51	First60=40.31	8	Topology=o10-27i34-53o83-100i107-129o144-166i187-209o224-246i266-288o
642737389	291	ExpAA=172.22	First60=31.26	8	Topology=o10-32i52-74o94-113i120-137o152-174i195-217o227-249i270-288o
642742284	291	ExpAA=172.21	First60=31.27	8	Topology=o10-32i52-74o94-113i120-137o152-174i195-217o227-249i270-288o
642747108	291	ExpAA=172.23	First60=31.27	8	Topology=o10-32i52-74o94-113i120-137o152-174i195-217o227-249i270-288o
642750240	149	ExpAA=87.97	First60=34.12	4	Topology=o5-27i51-73o88-110i123-145o
642753753	304	ExpAA=167.58	First60=27.39	8	Topology=o15-34i55-77o106-123i128-150o165-184i205-225o235-257i278-300o
642753818	295	ExpAA=162.32	First60=38.74	7	Topology=i7-29o44-66i121-143o153-175i195-217o227-249i270-292o
642757777	310	ExpAA=174.75	First60=36.81	7	Topology=i7-29o44-66i117-139o154-176i197-219o234-253i283-305o
642759378	309	ExpAA=173.49	First60=37.16	8	Topology=o10-32i44-66o96-113i120-142o157-179i200-222o232-254i282-304o
642766238	317	ExpAA=91.63	First60=0.77	4	Topology=o93-115i127-149o164-186i292-314o
642770993	291	ExpAA=172.24	First60=31.27	8	Topology=o10-32i52-74o94-113i120-137o152-174i195-217o227-249i270-288o
642775511	291	ExpAA=172.21	First60=31.27	8	Topology=o10-32i52-74o94-113i120-137o152-174i195-217o227-249i270-288o
642784543	291	ExpAA=172.20	First60=31.31	8	Topology=o10-32i52-74o94-113i120-137o152-174i195-217o227-249i270-288o
642788945	154	ExpAA=89.76	First60=30.25	4	Topology=o10-32i53-75o90-109i130-152o
642800299	300	ExpAA=81.39	First60=41.62	4	Topology=o4-26i39-56o71-93i160-182o
642818092	290	ExpAA=172.91	First60=31.99	8	Topology=o11-30i51-73o93-110i117-136o151-170i190-212o227-249i262-284o
642878649	544	ExpAA=193.13	First60=21.97	9	Topology=i7-29o148-170i183-202o229-251i258-280o295-317i338-357o372-394i406-428o
642910964	535	ExpAA=288.45	First60=36.40	13	Topology=i7-29o49-68i99-121o154-176i197-219o234-256i277-299o349-371i376-398o418-436i443-465o480-502i509-531o
642923745	147	ExpAA=86.10	First60=35.73	4	Topology=i7-24o39-61i82-104o124-146i
642924337	178	ExpAA=105.36	First60=39.08	5	Topology=o11-30i37-56o76-98i111-133o148-170i
642980127	313	ExpAA=174.66	First60=21.97	8	Topology=o29-51i63-85o95-117i124-146o161-183i204-223o260-282i289-311o
643016235	290	ExpAA=172.91	First60=31.99	8	Topology=o11-30i51-73o93-110i117-136o151-170i190-212o227-249i262-284o
643021547	661	ExpAA=347.94	First60=21.97	16	Topology=i25-47o67-89i113-135o155-173i180-199o214-236i243-265o280-299i311-333o370-389i401-423o438-460i483-505o520-539i552-574o597-619i
643025745	661	ExpAA=346.80	First60=22.01	16	Topology=i25-47o67-89i113-135o155-173i180-199o214-236i243-265o280-299i311-333o370-389i401-423o438-460i483-505o520-539i552-574o597-619i
643026469	661	ExpAA=346.80	First60=22.01	16	Topology=i25-47o67-89i113-135o155-173i180-199o214-236i243-265o280-299i311-333o370-389i401-423o438-460i483-505o520-539i552-574o597-619i
643034271	661	ExpAA=346.80	First60=22.01	16	Topology=i25-47o67-89i113-135o155-173i180-199o214-236i243-265o280-299i311-333o370-389i401-423o438-460i483-505o520-539i552-574o597-619i
643038508	661	ExpAA=346.80	First60=22.01	16	Topology=i25-47o67-89i113-135o155-173i180-199o214-236i243-265o280-299i311-333o370-389i401-423o438-460i483-505o520-539i552-574o597-619i
643047542	661	ExpAA=346.80	First60=22.01	16	Topology=i25-47o67-89i113-135o155-173i180-199o214-236i243-265o280-299i311-333o370-389i401-423o438-460i483-505o520-539i552-574o597-619i
643047880	661	ExpAA=346.80	First60=22.01	16	Topology=i25-47o67-89i113-135o155-173i180-199o214-236i243-265o280-299i311-333o370-389i401-423o438-460i483-505o520-539i552-574o597-619i
643090984	154	ExpAA=84.12	First60=31.05	4	Topology=o15-37i50-72o87-106i133-150o
643091404	294	ExpAA=148.52	First60=23.01	7	Topology=i27-49o75-94i101-120o140-162i183-205o215-237i264-286o
643143004	298	ExpAA=173.99	First60=34.95	8	Topology=o15-34i47-69o94-111i118-140o155-177i198-220o235-257i270-292o
643146166	298	ExpAA=174.98	First60=34.68	8	Topology=o15-34i47-69o94-111i118-140o155-177i199-221o236-258i271-293o
643174622	152	ExpAA=87.07	First60=31.23	4	Topology=i7-29o49-71i84-106o126-148i
643176780	309	ExpAA=178.06	First60=28.24	8	Topology=o13-35i56-78o100-122i129-151o166-188i201-220o235-257i277-299o
643193510	715	ExpAA=343.03	First60=22.17	16	Topology=i24-46o66-88i109-128o155-174i179-198o213-235i248-270o280-302i323-342o388-410i422-444o454-476i506-528o538-560i573-592o619-641i
643194910	152	ExpAA=89.33	First60=29.30	4	Topology=i7-29o59-81i88-110o125-147i
643200390	152	ExpAA=89.38	First60=32.12	4	Topology=o4-26i52-74o84-106i127-149o
643200781	308	ExpAA=176.98	First60=27.86	8	Topology=o13-35i56-78o98-120i127-149o169-191i204-226o241-263i284-306o
643205382	315	ExpAA=170.83	First60=27.80	8	Topology=o10-32i53-75o97-116i123-140o160-182i195-217o232-254i285-307o
643216586	114	ExpAA=64.95	First60=33.36	3	Topology=i21-43o50-72i93-111o
643227305	291	ExpAA=172.20	First60=31.27	8	Topology=o10-32i52-74o94-113i120-137o152-174i195-217o227-249i270-288o
643230606	153	ExpAA=86.90	First60=25.08	4	Topology=o15-37i57-79o89-111i132-150o
643237773	291	ExpAA=172.20	First60=31.27	8	Topology=o10-32i52-74o94-113i120-137o152-174i195-217o227-249i270-288o
643247009	181	ExpAA=106.96	First60=38.53	5	Topology=i9-28o43-65i85-107o117-139i160-178o
643254121	156	ExpAA=88.06	First60=23.65	4	Topology=o15-37i60-82o92-114i135-153o
643256540	291	ExpAA=172.20	First60=31.27	8	Topology=o10-32i52-74o94-113i120-137o152-174i195-217o227-249i270-288o
643268696	118	ExpAA=65.66	First60=29.88	3	Topology=i21-43o54-76i97-115o
643279202	291	ExpAA=172.20	First60=31.27	8	Topology=o10-32i52-74o94-113i120-137o152-174i195-217o227-249i270-288o
643349843	325	ExpAA=188.45	First60=22.56	9	Topology=i21-43o66-88i95-112o116-135i142-164o179-201i222-244o254-276i296-318o
643351368	152	ExpAA=89.47	First60=30.50	4	Topology=o4-26i52-74o84-106i127-149o
643352895	313	ExpAA=172.77	First60=30.05	8	Topology=o13-35i56-75o95-117i124-142o157-179i200-222o237-259i289-311o
643359580	291	ExpAA=172.21	First60=31.27	8	Topology=o10-32i52-74o94-113i120-137o152-174i195-217o227-249i270-288o
643364795	289	ExpAA=170.55	First60=36.70	8	Topology=o11-33i46-68o88-110i119-138o153-172i193-215o225-247i268-286o
643369523	291	ExpAA=172.21	First60=31.27	8	Topology=o10-32i52-74o94-113i120-137o152-174i195-217o227-249i270-288o
643386440	290	ExpAA=172.91	First60=31.99	8	Topology=o11-30i51-73o93-110i117-136o151-170i190-212o227-249i262-284o
643392832	150	ExpAA=86.63	First60=30.02	4	Topology=o10-32i53-75o85-107i128-147o
643407987	290	ExpAA=173.53	First60=31.77	8	Topology=o10-32i52-74o89-111i118-137o152-170i190-212o227-249i262-284o
643432090	293	ExpAA=175.63	First60=34.77	8	Topology=o15-34i47-69o95-112i124-146o151-173i193-215o230-252i265-287o
643443307	290	ExpAA=173.67	First60=32.23	8	Topology=o10-30i51-73o93-110i117-136o151-170i190-212o227-249i262-284o
643450478	549	ExpAA=196.20	First60=22.51	9	Topology=i12-34o156-175i188-207o234-256i268-290o300-322i342-364o374-396i408-430o
643454584	541	ExpAA=193.88	First60=20.38	9	Topology=i7-26o151-170i191-213o233-255i260-277o297-319i332-354o369-391i403-425o
643463797	313	ExpAA=176.18	First60=30.95	8	Topology=o10-32i52-74o107-124i129-151o166-188i208-230o245-267i284-306o
643469452	549	ExpAA=194.76	First60=22.52	9	Topology=i12-34o156-175i188-207o235-257i262-284o299-321i341-363o373-395i408-430o
643490493	290	ExpAA=173.53	First60=31.77	8	Topology=o10-32i52-74o89-111i118-137o152-170i190-212o227-249i262-284o
643501521	290	ExpAA=173.51	First60=31.90	8	Topology=o11-30i51-73o93-110i117-136o151-170i190-212o227-249i262-284o
643506678	290	ExpAA=171.36	First60=31.77	8	Topology=o10-32i52-74o89-111i118-137o152-174i194-216o226-248i269-287o
643508533	309	ExpAA=174.27	First60=37.76	8	Topology=o4-26i47-66o93-115i120-142o157-179i200-222o237-259i282-304o
643511037	290	ExpAA=173.14	First60=31.91	8	Topology=o11-30i51-73o93-110i117-136o151-170i190-212o227-249i262-284o
643529347	154	ExpAA=89.76	First60=30.25	4	Topology=o10-32i53-75o90-109i130-152o
643531007	364	ExpAA=169.91	First60=42.42	8	Topology=o4-26i39-61o92-111i118-137o157-179i192-214o229-251i301-323o
643546045	154	ExpAA=82.75	First60=30.39	4	Topology=o4-26i54-76o86-103i133-150o
643546780	144	ExpAA=84.44	First60=34.81	4	Topology=i5-27o49-71i84-106o121-143i
643549625	547	ExpAA=192.10	First60=18.69	9	Topology=i7-29o154-173i186-205o231-253i260-282o297-319i340-362o372-394i406-428o
643555361	439	ExpAA=173.25	First60=16.04	8	Topology=o46-65i78-97o124-146i158-180o190-212i232-254o264-286i298-320o
643580646	653	ExpAA=350.06	First60=27.71	16	Topology=i12-34o58-80i101-123o143-165i170-192o207-229i250-272o282-304i317-339o382-399i412-434o438-460i492-514o524-546i559-577o604-621i
643592123	718	ExpAA=350.69	First60=22.19	16	Topology=i37-59o82-104i125-147o177-195i197-219o234-256i277-299o309-331i352-374o417-434i447-469o484-506i535-557o567-586i599-621o647-669i
643604200	283	ExpAA=165.79	First60=38.97	8	Topology=o10-32i45-64o74-91i98-120o140-162i183-205o215-234i255-277o
643606531	659	ExpAA=346.38	First60=22.69	16	Topology=i19-41o70-92i113-130o155-177i184-203o213-235i242-264o279-301i314-336o368-387i399-421o436-458i481-503o518-537i550-572o596-618i
643616094	288	ExpAA=173.12	First60=39.73	8	Topology=o5-27i48-70o90-110i117-134o144-166i186-208o218-240i261-283o
643617780	153	ExpAA=89.87	First60=35.69	4	Topology=o4-26i47-69o79-101i130-152o
643623878	165	ExpAA=87.86	First60=28.07	4	Topology=o13-35i55-74o89-111i142-164o
643631580	549	ExpAA=195.71	First60=22.42	9	Topology=i12-34o156-175i188-207o234-256i268-290o300-322i342-364o374-396i408-430o
643652894	292	ExpAA=158.35	First60=25.25	7	Topology=i7-29o94-112i117-139o154-176i197-219o229-251i264-286o
643655403	159	ExpAA=90.33	First60=24.79	4	Topology=i13-35o60-82i94-116o136-158i
643655822	148	ExpAA=77.97	First60=30.75	3	Topology=o5-27i87-109o119-141i
643693608	642	ExpAA=350.08	First60=20.66	16	Topology=i21-40o63-85i98-120o150-167i172-194o209-231i244-266o276-297i317-339o376-398i411-433o443-465i499-521o526-548i560-582o608-630i
643700493	153	ExpAA=87.96	First60=30.05	4	Topology=o5-27i56-78o88-110i131-148o
643702315	290	ExpAA=172.29	First60=32.79	8	Topology=o11-30i51-73o93-111i118-137o152-174i194-216o226-248i261-283o
643729958	274	ExpAA=154.83	First60=27.08	7	Topology=i35-57o77-96i103-120o135-157i178-200o210-232i253-271o
643732925	661	ExpAA=346.80	First60=22.01	16	Topology=i25-47o67-89i113-135o155-173i180-199o214-236i243-265o280-299i311-333o370-389i401-423o438-460i483-505o520-539i552-574o597-619i
643741709	149	ExpAA=85.27	First60=34.52	4	Topology=i5-27o50-72i93-111o121-143i
643742841	152	ExpAA=86.06	First60=31.87	4	Topology=o4-26i54-76o96-115i127-146o
643762455	547	ExpAA=194.62	First60=21.31	9	Topology=i7-29o154-173i186-205o232-254i266-288o298-320i340-362o372-394i406-428o
643771797	541	ExpAA=193.89	First60=20.39	9	Topology=i7-26o151-170i191-213o233-255i260-277o297-319i332-354o369-391i403-425o
643773909	323	ExpAA=177.98	First60=26.11	8	Topology=o15-37i58-80o100-120i127-149o173-195i216-238o251-273i293-315o
643775442	269	ExpAA=156.20	First60=37.01	8	Topology=o10-32i39-61o76-98i105-127o142-159i175-197o207-229i242-264o
643776687	304	ExpAA=190.83	First60=40.12	9	Topology=i2-19o29-51i68-90o110-132i139-158o173-195i208-229o239-261i282-301o
643780439	711	ExpAA=345.80	First60=22.92	16	Topology=i27-49o73-95i108-130o157-174i179-201o216-238i251-273o283-305i324-346o385-402i414-436o451-473i506-528o533-555i575-597o617-639i
643799168	270	ExpAA=173.65	First60=41.68	8	Topology=o5-27i39-61o76-98i105-127o142-161i174-196o206-228i241-263o
643804845	154	ExpAA=83.60	First60=29.37	4	Topology=o10-32i52-74o84-106i133-150o
643818815	549	ExpAA=195.63	First60=21.80	9	Topology=i12-34o156-175i188-207o234-256i268-290o300-322i342-364o374-396i408-430o
643822476	535	ExpAA=199.46	First60=21.61	9	Topology=i13-35o149-171i178-200o220-242i251-273o283-305i318-340o350-372i392-414o
643835434	690	ExpAA=343.92	First60=22.72	14	Topology=i28-50o74-96i170-192o226-248i261-283o293-315i331-353o391-413i425-447o457-479i507-529o539-561i574-596o625-647i
643850749	549	ExpAA=195.63	First60=21.80	9	Topology=i12-34o156-175i188-207o234-256i268-290o300-322i342-364o374-396i408-430o
643868058	722	ExpAA=356.95	First60=17.24	16	Topology=i43-65o85-107i147-169o194-216i221-243o253-275i288-310o320-342i366-388o430-452i465-487o497-519i540-562o577-599i612-634o661-683i
643876052	740	ExpAA=341.54	First60=22.09	15	Topology=i19-41o61-83i104-123o153-170i177-199o209-231i244-266o276-298i319-341o376-398i410-432o442-464i494-516o526-548i561-583o
643881770	152	ExpAA=89.37	First60=30.42	4	Topology=o4-26i52-74o84-106i126-148o
643882103	310	ExpAA=177.47	First60=27.07	8	Topology=o13-35i56-78o98-120i127-149o169-191i203-225o240-262i281-303o
643892182	541	ExpAA=191.62	First60=21.58	9	Topology=i7-28o147-166i179-198o226-248i255-277o292-314i335-354o369-391i403-425o
643896577	541	ExpAA=191.62	First60=21.58	9	Topology=i7-28o147-166i179-198o226-248i255-277o292-314i335-354o369-391i403-425o
643901122	541	ExpAA=191.62	First60=21.58	9	Topology=i7-28o147-166i179-198o226-248i255-277o292-314i335-354o369-391i403-425o
643905500	541	ExpAA=191.62	First60=21.58	9	Topology=i7-28o147-166i179-198o226-248i255-277o292-314i335-354o369-391i403-425o
643937383	295	ExpAA=167.73	First60=33.03	8	Topology=i7-29o44-66i98-117o127-149i156-178o198-220i232-254o269-291i
644099642	63	ExpAA=42.35	First60=42.30	2	Topology=o6-24i37-59o
644125859	293	ExpAA=175.02	First60=32.43	8	Topology=o15-37i50-72o92-114i126-143o153-175i196-215o230-252i265-287o
644132987	662	ExpAA=349.61	First60=32.22	16	Topology=i7-29o52-74i95-117o145-164i171-193o203-225i238-260o270-292i305-327o364-386i399-421o431-450i471-493o508-527i540-562o591-613i
644204524	666	ExpAA=344.20	First60=23.59	16	Topology=i13-35o61-83i104-123o152-171i178-200o210-232i244-266o281-298i315-337o375-397i410-432o437-459i490-512o522-540i560-582o607-629i
644233539	305	ExpAA=177.70	First60=30.39	8	Topology=o10-30i51-73o93-115i122-144o159-181i202-221o231-253i281-303o
644233840	152	ExpAA=89.44	First60=31.20	4	Topology=o4-26i52-74o84-106i127-149o
644241126	152	ExpAA=89.44	First60=31.20	4	Topology=o4-26i52-74o84-106i127-149o
644242291	310	ExpAA=183.04	First60=28.03	8	Topology=o13-35i56-78o98-120i127-149o164-186i207-226o236-258i286-308o
644248534	152	ExpAA=89.44	First60=31.20	4	Topology=o4-26i52-74o84-106i127-149o
644249133	310	ExpAA=183.04	First60=28.03	8	Topology=o13-35i56-78o98-120i127-149o164-186i207-226o236-258i286-308o
644278825	654	ExpAA=349.45	First60=43.23	16	Topology=i2-24o39-61i88-110o130-152i159-181o191-213i226-248o258-280i293-315o355-377i389-411o421-443i471-493o503-525i538-560o589-611i
644279787	706	ExpAA=348.16	First60=16.24	16	Topology=i44-66o90-112i133-155o181-203i210-232o242-264i277-299o309-331i350-369o409-428i441-463o473-495i523-545o555-577i590-612o641-663i
644301904	290	ExpAA=173.47	First60=31.86	8	Topology=o11-30i51-73o93-110i117-136o151-170i190-212o227-249i262-284o
644342525	662	ExpAA=349.50	First60=32.07	16	Topology=i7-29o52-74i95-117o145-164i171-193o203-225i238-260o270-292i305-327o364-386i399-421o431-450i471-493o508-527i540-562o591-613i
644348391	718	ExpAA=352.36	First60=13.38	16	Topology=i47-69o94-116i137-159o185-207i214-231o246-268i281-303o318-340i353-375o412-434i447-469o479-501i530-552o562-584i597-619o646-668i
644348493	670	ExpAA=348.40	First60=21.88	16	Topology=i17-39o66-88i109-131o160-182i187-206o216-238i251-273o283-305i324-343o383-400i413-435o445-467i487-509o524-546i559-581o608-630i
644379018	153	ExpAA=84.29	First60=30.79	4	Topology=o10-29i50-72o82-104i133-152o
644414229	152	ExpAA=89.35	First60=32.14	4	Topology=o4-26i52-74o84-106i127-149o
644416405	315	ExpAA=170.55	First60=27.80	8	Topology=o10-32i53-75o97-116i123-140o160-182i195-217o232-254i285-307o
644416527	308	ExpAA=176.98	First60=27.86	8	Topology=o13-35i56-78o98-120i127-149o169-191i204-226o241-263i284-306o
644441822	299	ExpAA=175.65	First60=37.36	8	Topology=o10-32i44-66o94-111i118-140o155-177i198-220o238-260i273-295o
644455802	549	ExpAA=195.40	First60=22.45	9	Topology=i12-34o156-175i188-207o234-256i268-290o300-322i342-364o374-396i408-430o
644461163	549	ExpAA=194.94	First60=22.30	9	Topology=i12-34o156-175i188-207o235-257i262-284o299-321i341-363o373-395i408-430o
644467107	549	ExpAA=195.71	First60=22.43	9	Topology=i12-34o156-175i188-207o234-256i268-290o300-322i342-364o374-396i408-430o
644472864	549	ExpAA=195.63	First60=22.30	9	Topology=i12-34o156-175i188-207o235-257i262-284o299-321i342-364o374-396i408-430o
644478613	439	ExpAA=173.58	First60=15.99	8	Topology=o46-65i78-97o123-145i152-174o189-211i232-254o264-286i298-320o
644484311	549	ExpAA=195.18	First60=21.76	9	Topology=i12-34o156-175i188-207o235-257i262-284o299-321i342-364o374-396i408-430o
644489978	547	ExpAA=195.22	First60=21.87	9	Topology=i7-29o154-173i186-205o233-255i260-282o297-319i340-362o372-394i406-428o
644495678	549	ExpAA=195.81	First60=22.51	9	Topology=i12-34o156-175i188-207o233-255i262-284o299-321i342-364o374-396i408-430o
644501050	549	ExpAA=195.75	First60=22.29	9	Topology=i12-34o156-175i188-207o235-257i262-284o299-321i342-364o374-396i408-430o
644506371	549	ExpAA=195.61	First60=22.31	9	Topology=i12-34o156-175i188-207o233-255i262-284o299-321i342-364o374-396i408-430o
644511926	454	ExpAA=173.61	First60=1.12	8	Topology=o61-80i93-112o139-161i173-195o205-227i247-269o279-301i313-335o
644517736	516	ExpAA=173.13	First60=0.00	8	Topology=o123-142i155-174o202-224i229-251o266-288i309-331o341-363i375-397o
644523378	549	ExpAA=195.77	First60=22.31	9	Topology=i12-34o156-175i188-207o235-257i262-284o299-321i342-364o374-396i408-430o
644528932	549	ExpAA=195.71	First60=22.43	9	Topology=i12-34o156-175i188-207o234-256i268-290o300-322i342-364o374-396i408-430o
644534523	549	ExpAA=196.78	First60=21.95	9	Topology=i12-34o155-177i189-211o235-257i262-284o299-321i342-364o374-396i408-430o
644540422	549	ExpAA=195.31	First60=22.25	9	Topology=i12-34o156-175i188-207o233-255i262-284o299-321i342-364o374-396i408-430o
644546262	549	ExpAA=197.37	First60=22.39	9	Topology=i12-34o155-177i189-211o235-257i262-284o299-321i342-364o374-396i408-430o
644552104	549	ExpAA=197.37	First60=22.39	9	Topology=i12-34o155-177i189-211o235-257i262-284o299-321i342-364o374-396i408-430o
644558090	549	ExpAA=195.71	First60=22.43	9	Topology=i12-34o156-175i188-207o234-256i268-290o300-322i342-364o374-396i408-430o
644568260	549	ExpAA=195.60	First60=22.27	9	Topology=i12-34o156-175i188-207o235-257i262-284o299-321i342-364o374-396i408-430o
644576912	549	ExpAA=195.62	First60=22.30	9	Topology=i12-34o156-175i188-207o235-257i262-284o299-321i342-364o374-396i408-430o
644583058	549	ExpAA=195.18	First60=21.21	9	Topology=i12-34o156-175i188-207o235-257i262-284o299-321i342-364o374-396i408-430o
644588966	549	ExpAA=195.54	First60=22.28	9	Topology=i12-34o156-175i188-207o233-255i262-284o299-321i342-364o374-396i408-430o
644594639	549	ExpAA=195.28	First60=22.14	9	Topology=i12-34o156-175i188-207o235-257i262-284o299-321i342-364o374-396i408-430o
644600393	549	ExpAA=196.46	First60=22.10	9	Topology=i12-34o156-175i188-207o235-257i262-284o299-321i342-364o374-396i408-430o
644606318	408	ExpAA=173.46	First60=34.14	8	Topology=o15-34i47-66o94-116i121-143o158-180i201-223o233-255i267-289o
644612157	549	ExpAA=195.66	First60=21.73	9	Topology=i12-34o156-175i188-207o235-257i262-284o299-321i342-364o374-396i408-430o
644629772	562	ExpAA=195.37	First60=22.01	9	Topology=i20-42o167-186i198-220o246-268i275-292o312-334i354-376o386-408i421-443o
644635728	549	ExpAA=195.43	First60=22.46	9	Topology=i12-34o156-175i188-207o234-256i268-290o300-322i342-364o374-396i408-430o
644641577	549	ExpAA=195.13	First60=22.27	9	Topology=i12-34o156-175i188-207o235-257i264-281o301-323i342-364o374-396i408-430o
644647955	549	ExpAA=195.13	First60=22.27	9	Topology=i12-34o156-175i188-207o235-257i264-281o301-323i342-364o374-396i408-430o
644658171	551	ExpAA=193.06	First60=19.66	9	Topology=i12-34o158-177i190-209o235-257i264-286o301-323i344-366o376-398i410-432o
644660990	549	ExpAA=195.80	First60=22.30	9	Topology=i12-34o156-175i188-207o235-257i262-284o299-321i342-364o374-396i408-430o
644667111	549	ExpAA=195.63	First60=22.30	9	Topology=i12-34o156-175i188-207o235-257i262-284o299-321i342-364o374-396i408-430o
644672739	549	ExpAA=195.74	First60=22.43	9	Topology=i12-34o156-175i188-207o234-256i268-290o300-322i342-364o374-396i408-430o
644679314	549	ExpAA=195.13	First60=22.27	9	Topology=i12-34o156-175i188-207o235-257i264-281o301-323i342-364o374-396i408-430o
644685642	549	ExpAA=195.80	First60=22.43	9	Topology=i12-34o156-175i188-207o233-255i262-284o299-321i342-364o374-396i408-430o
644691303	549	ExpAA=195.70	First60=22.43	9	Topology=i12-34o156-175i188-207o234-256i268-290o300-322i342-364o374-396i408-430o
644697383	551	ExpAA=194.75	First60=22.19	9	Topology=i12-34o158-177i190-209o237-259i264-286o301-323i343-365o375-397i410-432o
644703590	549	ExpAA=195.63	First60=21.80	9	Topology=i12-34o156-175i188-207o234-256i268-290o300-322i342-364o374-396i408-430o
644709675	549	ExpAA=195.29	First60=21.91	9	Topology=i12-34o156-175i188-207o235-257i262-284o299-321i342-364o374-396i408-430o
644716358	468	ExpAA=173.18	First60=0.01	8	Topology=o75-94i107-126o152-174i181-203o218-240i261-283o293-315i327-349o
644727827	313	ExpAA=194.13	First60=43.19	9	Topology=i9-28o38-60i77-99o119-141i148-167o182-204i217-238o248-270i291-310o
[truncated: 10,189 more rows]

## Sheet: length-distro
aa	num
56	2
59	1
61	1
63	3
65	1
66	1
67	5
71	1
72	1
75	1
77	1
78	1
79	2
80	2
81	2
84	1
86	1
87	2
91	4
93	4
94	1
99	1
103	11
104	4
106	1
107	2
108	1
110	1
114	2
115	2
118	2
[truncated: 578 more rows]

## Sheet: pmmo
Genome	Genome	Genome		y/n copD
[truncated: 10,886 more rows]
